# Supplementary material for: Examining ozone effects on the tropical C4 crop Sorghum bicolor
Source: PeerJ journal article supplement (doi:10.7717/peerj.18844), 2025-01-20
Supplement: Data_set_S1.zip [file Data_set_S1.zip]

## Sheet: Metadata
	Species	Sorghum bicolor cv HAT150843 (SB1)
Open top chamber averages (n=3)
	Parameter	Description	Detail/Units
	Exp_ID	Experiment ID
	Plant_ID	unique plant ID
	Cham_ID	Chamber number
	Biomass	Grain, Im. Grain, leaves, stems and roots weight	g
	Grain_DW	Grain dry weight	g
	Im.Grain_DW	Imature grain dry weight	g
	Leaves_DW	Leaves dry weight	g
	Stems_DW	Stems dry weight	g
	Roots_DW	Roots dry weight	g
	LMA	Leaf mass per area	g/m2
	Stoma_PL	Stomatal pore length	μm
	Stoma_Density	Stomatal density	mm-2

## Sheet: Data
Exp_ID	Plant_ID	Cham_ID	Grain_DW	Im.Grain_DW	Leaves_DW	Stems_DW	Roots_DW	LMA	Stoma_PL	Stoma_Density
SB1	1	1	412.214	NA	66.4755	302.5	143.1	42.4946	18.855	197.917
SB1	2	1	372.054	NA	48.6675	213.9	120	50.0924	19.1047	218.75
SB1	3	1	342.024	NA	56.2888	263.1	138.7	53.7548	21.7275	200
SB1	4	2	390.994	NA	59.1741	290.3	85.2	47.7031	19.5478	205.556
SB1	5	2	390.704	NA	86.7458	262.4	102.9	42.3757	19.5442	172.222
SB1	6	2	386.494	7.998	51.5772	241.3	57.7	44.3633	20.9947	139.583
SB1	7	3	373.854	NA	58.758	214.4	71.5	44.7031	19.5908	175
SB1	8	3	384.614	NA	56.5602	223.6	66.5	47.3589	20.4442	223.611
SB1	9	3	385.364	NA	46.3154	235.7	86.7	49.0476	19.1158	222.917
SB1	10	4	377.494	36.828	88.9844	283	139.1	42.9441	18.8611	215.278
SB1	11	4	437.814	NA	61.4885	259.5	69.8	46.7429	21.7272	197.222
SB1	12	4	352.734	NA	46.2126	206.2	84.7	54.3413	18.8192	201.042
SB1	13	5	392.524	NA	62.848	274	80.5	46.8734	20.6486	198.611
SB1	14	5	315.224	27.858	81.9362	278.8	102	44.0828	22.4617	184.028
SB1	15	5	326.184	NA	38.3117	196.2	54.3	49.9041	19.1144	170.833
SB1	16	6	381.124	NA	71.723	270.7	109.9	50.3524	20.15	200.694
SB1	17	6	457.644	NA	77.3775	313.1	104	47.6836	20.1928	195.833
SB1	18	6	334.154	20.898	53.1105	208.6	69	45.8237	17.1058	207.292
SB1	19	7	428.554	NA	66.5243	292.5	83.7	44.6652	20.3661	180.556
SB1	20	7	377.494	NA	66.5403	237.3	72.9	51.5521	19.7386	197.917
SB1	21	7	317.964	NA	37.3195	190.8	65.3	49.5169	21.0331	186.806
SB1	22	8	408.954	NA	60.7854	254.8	84.9	50.8655	19.4944	226.389
SB1	23	8	457.054	NA	73.8	291.5	107.5	43.6339	20.8261	152.778
SB1	24	8	335.224	NA	53.4753	197.5	78.8	50.0874	17.8197	213.889
SB1	25	9	349.664	NA	87.478	286	83	44.7053	20.1614	195.139
SB1	26	9	288.394	NA	48.916	208.6	62.5	46.6008	20.8331	153.472
SB1	27	9	410.984	NA	57.4801	259.9	82.5	45.6925	20.7719	188.889

## Sheet: Metadata2
Environmental variables
	Parameter	Description	Detail/Units
	Air_Temp	Air temperature	°C
	RH_Max	Maximum relative humidity	%
	RH_Min	Minimum relative humidity	%
	PAR	Photosyntheticallyactive radiation	μmol m-2 s-1
	datetime	Date and time

## Sheet: Data2
Air_Temp	datetime	PAR	RH_min	RH_max
28.17	2020-07-13 12:00:00	1309.84	48.1891	50.5888
28.36	2020-07-13 12:05:00	1712.25	48.3586	50.3211
28.79	2020-07-13 12:10:00	1849.53	46.5477	49.5004
28.82	2020-07-13 12:15:00	1262.86	46.5745	48.1713
28.19	2020-07-13 12:20:00	975.917	47.5111	49.8216
28.11	2020-07-13 12:25:00	1403.42	48.6797	50.8296
28.24	2020-07-13 12:30:00	1389.25	48.1802	49.5986
28.34	2020-07-13 12:35:00	1503.68	47.9037	50.339
28.92	2020-07-13 12:40:00	1902.84	45.95	50.0892
29.14	2020-07-13 12:45:00	1857.05	46.066	48.6351
29.52	2020-07-13 12:50:00	1937.91	44.2819	47.9393
29.93	2020-07-13 12:55:00	1830.86	44.6922	46.4585
29.79	2020-07-13 13:00:00	1775.96	44.1391	46.735
29.66	2020-07-13 13:05:00	1834.58	44.2194	46.4407
29.81	2020-07-13 13:10:00	1879.81	43.4344	45.611
30.11	2020-07-13 13:15:00	1941.85	43.1043	45.504
30.36	2020-07-13 13:20:00	1985.69	42.3015	43.8002
30.51	2020-07-13 13:25:00	1985.69	42.1944	43.702
30.7	2020-07-13 13:30:00	2001.87	41.9447	43.0151
30.53	2020-07-13 13:35:00	1129.47	42.6137	43.8091
29.7	2020-07-13 13:40:00	1358.58	42.801	45.2007
29.21	2020-07-13 13:45:00	1162.02	44.9242	47.1097
29.05	2020-07-13 13:50:00	1181.05	45.3345	47.3773
28.79	2020-07-13 13:55:00	1100.06	45.7984	47.6985
28.73	2020-07-13 14:00:00	1342.14	46.0838	47.3595
28.5	2020-07-13 14:05:00	933.301	46.512	48.4835
28.37	2020-07-13 14:10:00	1120.34	46.5745	47.9304
28.83	2020-07-13 14:15:00	1215.09	46.4228	48.0375
28.94	2020-07-13 14:20:00	1375.22	45.7805	47.1008
30.08	2020-07-13 14:25:00	1926.15	42.9705	46.2177
30.77	2020-07-13 14:30:00	1875.99	41.6414	43.5682
31.04	2020-07-13 14:35:00	1808.7	41.124	43.2828
30.9	2020-07-13 14:40:00	1733.23	41.347	42.9527
30.68	2020-07-13 14:45:00	1617.66	41.6592	42.8992
30.62	2020-07-13 14:50:00	1443.87	42.1231	43.2917
30.74	2020-07-13 14:55:00	1525.2	41.686	43.5593
30.68	2020-07-13 15:00:00	1470.48	42.4442	43.5504
30.37	2020-07-13 15:05:00	1438.02	43.4344	44.7814
30.25	2020-07-13 15:10:00	1397.74	42.9973	44.9509
30.15	2020-07-13 15:15:00	1339.41	43.0597	44.157
29.88	2020-07-13 15:20:00	1275.74	44.0589	45.7181
29.77	2020-07-13 15:25:00	1224.99	44.3978	46.1463
29.46	2020-07-13 15:30:00	1173.88	44.1748	46.3247
28.9	2020-07-13 15:35:00	1136.37	45.7538	46.6458
28.36	2020-07-13 15:40:00	1084.54	46.3247	47.7163
28.18	2020-07-13 15:45:00	1041.4	46.628	47.7609
28.18	2020-07-13 15:50:00	991.892	47.1454	48.314
28.2	2020-07-13 15:55:00	956.31	46.8332	48.5549
28.25	2020-07-13 16:00:00	883.534	46.7529	48.7154
28.27	2020-07-13 16:05:00	804.781	46.066	47.1722
28.11	2020-07-13 16:10:00	146.224	46.0749	48.2872
28.07	2020-07-13 16:15:00	154.053	45.9857	47.3149
28.08	2020-07-13 16:20:00	167.319	46.1017	47.7074
28.02	2020-07-13 16:25:00	160.598	46.967	48.2159
27.94	2020-07-13 16:30:00	196.615	46.5566	47.752
27.78	2020-07-13 16:35:00	222.754	46.405	47.6093
27.66	2020-07-13 16:40:00	246.695	46.4228	52.1231
26.57	2020-07-13 16:45:00	45.5659	51.9536	57.5558
24.76	2020-07-13 16:50:00	27.9734	56.8421	61.1151
23.71	2020-07-13 16:55:00	26.6003	61.3203	65.8341
23	2020-07-13 17:00:00	24.7914	65.9144	67.9751
22.59	2020-07-13 17:05:00	22.7611	67.538	69.6165
22.14	2020-07-13 17:10:00	20.6651	69.5541	70.8832
21.82	2020-07-13 17:15:00	18.4524	70.9903	73.265
21.53	2020-07-13 17:20:00	16.1719	71.4809	73.5059
21.42	2020-07-13 17:25:00	13.9082	73.1669	74.7637
21.13	2020-07-13 17:30:00	11.6547	74.8529	76.4675
20.86	2020-07-13 17:35:00	9.42929	76.2981	77.9216
20.6	2020-07-13 17:40:00	7.30163	77.9662	78.6977
20.38	2020-07-13 17:45:00	5.44018	78.2695	78.9386
20.2	2020-07-13 17:50:00	3.88416	78.5193	80.2767
19.92	2020-07-13 17:55:00	2.71197	80.2767	82.15
19.65	2020-07-13 18:00:00	1.95603	82.2124	82.6406
19.43	2020-07-13 18:05:00	1.50853	82.7298	83.6754
19.21	2020-07-13 18:10:00	1.25413	83.39	84.4515
19.01	2020-07-13 18:15:00	1.14003	84.4515	85.1652
18.83	2020-07-13 18:20:00	1.10585	85.1652	85.4328
18.68	2020-07-13 18:25:00	1.09914	85.076	85.7896
18.53	2020-07-13 18:30:00	1.09914	85.2544	86.1464
18.37	2020-07-13 18:35:00	1.10361	85.8788	86.4141
18.25	2020-07-13 18:40:00	1.10585	86.3249	86.8601
18.14	2020-07-13 18:45:00	1.11035	86.8601	87.2169
18.04	2020-07-13 18:50:00	1.1126	87.1277	87.3953
17.94	2020-07-13 18:55:00	1.11486	87.2169	87.4845
17.84	2020-07-13 19:00:00	1.11713	87.3061	87.4845
17.76	2020-07-13 19:05:00	1.1194	87.3953	87.663
17.72	2020-07-13 19:10:00	1.12167	87.3953	87.5737
17.65	2020-07-13 19:15:00	1.12167	87.4845	87.8414
17.55	2020-07-13 19:20:00	1.12395	87.5737	88.2874
17.51	2020-07-13 19:25:00	1.12623	88.109	88.555
17.43	2020-07-13 19:30:00	1.12852	88.1982	88.6442
17.36	2020-07-13 19:35:00	1.12852	88.1982	88.6442
17.26	2020-07-13 19:40:00	1.12852	88.3766	88.9118
17.2	2020-07-13 19:45:00	1.13082	88.7334	89.0903
17.14	2020-07-13 19:50:00	1.13311	88.9118	89.0903
17.06	2020-07-13 19:55:00	1.13311	89.0011	89.5363
17.01	2020-07-13 20:00:00	1.13311	89.4471	89.6255
16.94	2020-07-13 20:05:00	1.13541	89.0903	89.6255
16.88	2020-07-13 20:10:00	1.13772	89.2687	89.8931
16.86	2020-07-13 20:15:00	1.13772	89.5363	89.9823
16.84	2020-07-13 20:20:00	1.14003	89.7147	90.1607
16.78	2020-07-13 20:25:00	1.14003	89.8039	90.2499
16.74	2020-07-13 20:30:00	1.14235	89.8931	90.4284
16.67	2020-07-13 20:35:00	1.14235	90.1607	90.3391
16.61	2020-07-13 20:40:00	1.14467	90.1607	90.6068
16.59	2020-07-13 20:45:00	1.14235	90.4284	90.8744
16.6	2020-07-13 20:50:00	1.14467	90.3391	90.8744
16.55	2020-07-13 20:55:00	1.14467	90.1607	90.6068
16.52	2020-07-13 21:00:00	1.14467	90.2499	90.5176
16.55	2020-07-13 21:05:00	1.14467	90.3391	90.6068
16.53	2020-07-13 21:10:00	1.147	90.1607	90.4284
16.47	2020-07-13 21:15:00	1.147	90.3391	90.6068
16.39	2020-07-13 21:20:00	1.147	90.2499	90.7852
16.36	2020-07-13 21:25:00	1.14933	90.4284	90.7852
16.38	2020-07-13 21:30:00	1.14933	90.2499	90.8744
16.31	2020-07-13 21:35:00	1.14933	90.3391	90.696
16.25	2020-07-13 21:40:00	1.15166	90.5176	90.9636
16.21	2020-07-13 21:45:00	1.15166	90.9636	91.142
16.22	2020-07-13 21:50:00	1.15166	91.142	91.3204
16.26	2020-07-13 21:55:00	1.15166	90.3391	91.142
16.19	2020-07-13 22:00:00	1.154	90.6068	90.9636
16.13	2020-07-13 22:05:00	1.154	90.8744	91.142
16.11	2020-07-13 22:10:00	1.154	90.8744	91.3204
16.04	2020-07-13 22:15:00	1.154	90.9636	91.4988
16	2020-07-13 22:20:00	1.15634	91.3204	91.588
15.98	2020-07-13 22:25:00	1.15634	91.4096	91.6772
15.97	2020-07-13 22:30:00	1.15634	91.3204	91.588
15.95	2020-07-13 22:35:00	1.15634	91.2312	91.6772
15.92	2020-07-13 22:40:00	1.15869	91.2312	91.588
15.88	2020-07-13 22:45:00	1.15869	91.4988	91.6772
15.84	2020-07-13 22:50:00	1.15869	91.588	91.9449
15.88	2020-07-13 22:55:00	1.15869	91.6772	92.1233
15.87	2020-07-13 23:00:00	1.15869	91.4988	91.8557
15.86	2020-07-13 23:05:00	1.15869	91.588	91.8557
15.85	2020-07-13 23:10:00	1.15869	91.7665	91.9449
15.87	2020-07-13 23:15:00	1.15869	91.8557	91.9449
15.9	2020-07-13 23:20:00	1.15634	91.6772	91.8557
15.9	2020-07-13 23:25:00	1.15869	91.6772	91.9449
15.86	2020-07-13 23:30:00	1.15869	91.4988	91.6772
15.78	2020-07-13 23:35:00	1.16105	91.4988	91.7665
15.71	2020-07-13 23:40:00	1.16105	91.7665	91.8557
15.67	2020-07-13 23:45:00	1.16105	91.588	91.9449
15.63	2020-07-13 23:50:00	1.16341	91.6772	92.0341
15.61	2020-07-13 23:55:00	1.16341	91.7665	92.1233
15.58	2020-07-14	1.16341	91.7665	92.2125
15.54	2020-07-14 00:05:00	1.16341	91.7665	92.2125
15.48	2020-07-14 00:10:00	1.16577	91.588	92.1233
15.44	2020-07-14 00:15:00	1.16577	91.7665	92.3017
15.43	2020-07-14 00:20:00	1.16814	91.7665	92.3909
15.35	2020-07-14 00:25:00	1.16814	91.6772	92.2125
15.33	2020-07-14 00:30:00	1.16577	92.1233	92.3017
15.32	2020-07-14 00:35:00	1.16814	91.9449	92.2125
15.29	2020-07-14 00:40:00	1.17051	91.8557	92.4801
15.22	2020-07-14 00:45:00	1.17051	91.8557	92.3909
15.21	2020-07-14 00:50:00	1.17051	92.2125	92.3017
15.18	2020-07-14 00:55:00	1.17289	92.0341	92.2125
15.15	2020-07-14 01:00:00	1.17289	92.0341	92.2125
15.17	2020-07-14 01:05:00	1.17289	91.9449	92.3017
15.13	2020-07-14 01:10:00	1.17289	91.6772	91.8557
15.09	2020-07-14 01:15:00	1.17289	91.8557	92.1233
15.08	2020-07-14 01:20:00	1.17289	91.7665	92.2125
15.06	2020-07-14 01:25:00	1.17289	92.0341	92.4801
15.06	2020-07-14 01:30:00	1.17289	92.0341	92.5693
15.04	2020-07-14 01:35:00	1.17289	92.0341	92.1233
15	2020-07-14 01:40:00	1.17527	92.0341	92.2125
14.96	2020-07-14 01:45:00	1.17527	91.9449	92.3017
14.95	2020-07-14 01:50:00	1.17527	91.9449	92.3909
14.91	2020-07-14 01:55:00	1.17527	91.7665	92.0341
14.85	2020-07-14 02:00:00	1.17766	91.8557	92.2125
14.82	2020-07-14 02:05:00	1.17766	91.9449	92.2125
14.84	2020-07-14 02:10:00	1.17766	91.7665	92.1233
14.88	2020-07-14 02:15:00	1.17766	91.142	92.1233
14.97	2020-07-14 02:20:00	1.17527	90.7852	91.142
14.9	2020-07-14 02:25:00	1.17766	90.9636	91.4096
14.87	2020-07-14 02:30:00	1.17766	91.4096	92.1233
14.84	2020-07-14 02:35:00	1.17766	91.142	92.1233
14.75	2020-07-14 02:40:00	1.18005	91.142	91.3204
14.69	2020-07-14 02:45:00	1.18005	91.3204	91.7665
14.76	2020-07-14 02:50:00	1.18005	91.0528	91.4096
14.83	2020-07-14 02:55:00	1.18005	90.6068	91.2312
14.83	2020-07-14 03:00:00	1.18005	90.6068	90.7852
14.84	2020-07-14 03:05:00	1.18005	90.696	91.142
14.81	2020-07-14 03:10:00	1.18005	90.1607	90.8744
14.86	2020-07-14 03:15:00	1.18005	89.8931	90.3391
14.86	2020-07-14 03:20:00	1.18005	90.3391	90.8744
14.8	2020-07-14 03:25:00	1.18005	89.8931	90.8744
14.78	2020-07-14 03:30:00	1.18005	89.8931	90.1607
14.69	2020-07-14 03:35:00	1.18245	89.9823	90.2499
14.6	2020-07-14 03:40:00	1.18245	90.3391	90.7852
14.55	2020-07-14 03:45:00	1.18245	90.6068	91.4096
14.52	2020-07-14 03:50:00	1.18485	91.0528	91.6772
14.47	2020-07-14 03:55:00	1.18485	90.8744	91.142
14.37	2020-07-14 04:00:00	1.18485	90.7852	91.142
14.32	2020-07-14 04:05:00	1.18485	91.142	91.588
14.3	2020-07-14 04:10:00	1.18726	91.4096	91.6772
14.25	2020-07-14 04:15:00	1.18726	91.2312	91.6772
14.18	2020-07-14 04:20:00	1.18967	91.142	91.4096
14.14	2020-07-14 04:25:00	1.18967	91.3204	91.588
14.13	2020-07-14 04:30:00	1.18967	90.5176	91.4988
14.14	2020-07-14 04:35:00	1.18967	90.5176	91.3204
14.07	2020-07-14 04:40:00	1.19209	90.696	91.0528
13.98	2020-07-14 04:45:00	1.19209	91.0528	91.4096
13.91	2020-07-14 04:50:00	1.19209	91.0528	91.3204
13.88	2020-07-14 04:55:00	1.19209	91.2312	91.588
13.86	2020-07-14 05:00:00	1.19451	91.142	91.4096
13.85	2020-07-14 05:05:00	1.19451	90.8744	91.588
13.8	2020-07-14 05:10:00	1.19451	89.9823	90.7852
13.74	2020-07-14 05:15:00	1.19694	90.2499	91.0528
13.7	2020-07-14 05:20:00	1.19451	90.6068	91.142
13.64	2020-07-14 05:25:00	1.19694	90.6068	90.9636
13.55	2020-07-14 05:30:00	1.19694	90.7852	90.9636
13.49	2020-07-14 05:35:00	1.19937	90.9636	91.2312
13.45	2020-07-14 05:40:00	1.19937	91.142	91.3204
13.43	2020-07-14 05:45:00	1.19937	90.6068	91.4988
13.36	2020-07-14 05:50:00	1.19937	90.7852	91.142
13.27	2020-07-14 05:55:00	1.20181	90.9636	91.2312
13.18	2020-07-14 06:00:00	1.20181	91.0528	91.4096
13.16	2020-07-14 06:05:00	1.20181	91.142	91.4988
13.13	2020-07-14 06:10:00	1.20181	90.8744	91.142
13.07	2020-07-14 06:15:00	1.20181	90.9636	91.4096
13.05	2020-07-14 06:20:00	1.20181	90.5176	91.3204
13.06	2020-07-14 06:25:00	1.20181	89.9823	90.5176
13.08	2020-07-14 06:30:00	1.20915	89.9823	90.5176
13.1	2020-07-14 06:35:00	1.23644	89.8039	90.1607
13.13	2020-07-14 06:40:00	1.34101	89.6255	89.8039
13.08	2020-07-14 06:45:00	1.59027	89.5363	90.1607
13.03	2020-07-14 06:50:00	2.02059	89.7147	90.1607
12.96	2020-07-14 06:55:00	2.7958	89.5363	90.1607
12.91	2020-07-14 07:00:00	4.29901	89.6255	90.3391
12.95	2020-07-14 07:05:00	6.41222	90.2499	90.6068
13.04	2020-07-14 07:10:00	8.55403	90.3391	90.5176
13.08	2020-07-14 07:15:00	10.8467	90.1607	90.4284
13.12	2020-07-14 07:20:00	13.2362	89.9823	90.5176
13.14	2020-07-14 07:25:00	15.5349	90.0715	90.696
13.18	2020-07-14 07:30:00	17.568	89.6255	90.696
13.23	2020-07-14 07:35:00	20.1393	89.8039	90.2499
13.37	2020-07-14 07:40:00	23.4742	88.7334	90.3391
13.75	2020-07-14 07:45:00	76.3459	85.7896	88.6442
14.79	2020-07-14 07:50:00	133.678	82.3284	85.522
15.41	2020-07-14 07:55:00	158.815	81.3739	83.2472
15.9	2020-07-14 08:00:00	185.603	81.0438	83.0867
16.37	2020-07-14 08:05:00	213.459	80.0001	81.6058
16.88	2020-07-14 08:10:00	248.403	78.1	81.1509
17.25	2020-07-14 08:15:00	276.557	76.7352	78.5282
17.67	2020-07-14 08:20:00	296.495	75.6915	77.6094
18.09	2020-07-14 08:25:00	282.858	75.5755	77.2972
18.75	2020-07-14 08:30:00	269.739	64.7101	75.1562
19.63	2020-07-14 08:35:00	285.859	50.8921	66.8689
20.81	2020-07-14 08:40:00	321.569	47.7074	53.7913
21.73	2020-07-14 08:45:00	318.969	41.7841	49.5094
22.41	2020-07-14 08:50:00	265.61	40.8831	43.0865
22.89	2020-07-14 08:55:00	231.982	39.6075	42.3996
23.27	2020-07-14 09:00:00	263.195	39.7323	40.8831
23.7	2020-07-14 09:05:00	382.116	38.9027	41.2935
23.94	2020-07-14 09:10:00	391.537	38.7511	39.9732
24.15	2020-07-14 09:15:00	399.564	38.0731	39.7056
24.41	2020-07-14 09:20:00	426.376	38.983	40.5798
24.63	2020-07-14 09:25:00	663.655	37.7609	39.6164
24.45	2020-07-14 09:30:00	724.175	37.7163	39.5093
24.4	2020-07-14 09:35:00	1058.45	38.0553	39.6253
24.5	2020-07-14 09:40:00	1222.51	38.4121	39.7056
24.56	2020-07-14 09:45:00	1250.11	38.4121	39.2595
24.7	2020-07-14 09:50:00	1296.62	38.2961	39.1971
24.82	2020-07-14 09:55:00	1344.86	37.9482	39.3309
25.04	2020-07-14 10:00:00	1386.43	37.5914	38.4656
25.34	2020-07-14 10:05:00	1420.61	37.8322	39.0009
25.71	2020-07-14 10:10:00	1452.69	36.5923	38.8938
25.95	2020-07-14 10:15:00	1497.59	37.0115	38.5281
26.22	2020-07-14 10:20:00	1534.51	36.4852	37.9482
26.34	2020-07-14 10:25:00	1556.47	36.1641	37.1454
26.34	2020-07-14 10:30:00	1585.16	35.95	37.0294
26.54	2020-07-14 10:35:00	1607.84	35.8519	37.6984
26.72	2020-07-14 10:40:00	1627.54	36.1908	36.9402
26.73	2020-07-14 10:45:00	1647.48	35.2988	36.851
26.63	2020-07-14 10:50:00	1664.28	35.6645	36.6993
26.66	2020-07-14 10:55:00	1684.67	35.6378	36.851
27.03	2020-07-14 11:00:00	1708.78	34.8974	36.1641
27.11	2020-07-14 11:05:00	1726.21	34.6833	35.504
27.07	2020-07-14 11:10:00	1743.81	34.9063	35.7627
27.21	2020-07-14 11:15:00	1761.6	34.5138	36.1552
27.33	2020-07-14 11:20:00	1775.96	34.6208	35.4772
27.37	2020-07-14 11:25:00	1790.44	34.6119	36.0392
27.47	2020-07-14 11:30:00	1805.03	34.6208	36.2533
27.45	2020-07-14 11:35:00	1812.37	33.9518	35.5753
27.43	2020-07-14 11:40:00	1819.74	33.9964	34.7368
27.56	2020-07-14 11:45:00	1827.14	34.5316	35.8697
27.73	2020-07-14 11:50:00	1838.3	34.6387	36.0838
27.86	2020-07-14 11:55:00	1845.78	33.8001	35.5396
27.9	2020-07-14 12:00:00	1849.53	33.5593	35.5129
27.96	2020-07-14 12:05:00	1857.05	33.5593	34.9152
27.93	2020-07-14 12:10:00	1864.61	33.1311	34.5227
28.15	2020-07-14 12:15:00	1872.19	33.5949	35.1739
28.15	2020-07-14 12:20:00	1872.19	33.5057	35.834
28.16	2020-07-14 12:25:00	1875.99	34.0945	35.165
28.13	2020-07-14 12:30:00	1879.81	34.0053	35.3701
28.36	2020-07-14 12:35:00	1883.62	34.6208	37.0829
28.84	2020-07-14 12:40:00	1887.45	35.6735	37.3148
28.88	2020-07-14 12:45:00	1895.13	35.611	37.0294
28.83	2020-07-14 12:50:00	1898.98	36.1284	37.5646
28.9	2020-07-14 12:55:00	1906.7	35.8786	37.413
29.02	2020-07-14 13:00:00	1910.58	34.0588	37.4397
29.04	2020-07-14 13:05:00	1910.58	34.7279	36.1373
29.17	2020-07-14 13:10:00	1918.35	36.2265	37.8322
29.48	2020-07-14 13:15:00	1918.35	36.2176	37.4576
29.79	2020-07-14 13:20:00	1922.24	36.3514	37.8055
29.81	2020-07-14 13:25:00	1922.24	36.5566	37.3773
29.89	2020-07-14 13:30:00	1918.35	36.6101	38.2069
29.75	2020-07-14 13:35:00	1914.46	36.4942	37.7074
29.69	2020-07-14 13:40:00	1906.7	36.7082	38.082
29.75	2020-07-14 13:45:00	1898.98	36.8688	38.4924
29.75	2020-07-14 13:50:00	1895.13	37.6182	39.2417
29.59	2020-07-14 13:55:00	1887.45	37.743	39.7769
29.36	2020-07-14 14:00:00	1875.99	38.5102	40.0356
29.24	2020-07-14 14:05:00	1860.83	39.6342	41.5611
29.25	2020-07-14 14:10:00	1845.78	39.0633	41.8019
29.21	2020-07-14 14:15:00	1827.14	38.9295	40.6155
29.2	2020-07-14 14:20:00	1805.03	40.3746	41.1507
29.02	2020-07-14 14:25:00	1775.96	40.3479	41.7038
28.77	2020-07-14 14:30:00	1740.28	40.7939	42.3104
28.66	2020-07-14 14:35:00	1698.41	40.9902	42.8724
28.54	2020-07-14 14:40:00	1654.18	41.0704	42.3461
28.35	2020-07-14 14:45:00	1604.58	41.5076	42.2301
28.25	2020-07-14 14:50:00	1547.02	41.2489	42.3283
28.17	2020-07-14 14:55:00	1494.56	41.0972	42.239
28.21	2020-07-14 15:00:00	1435.1	41.2756	42.2123
28.1	2020-07-14 15:05:00	1378.02	41.6503	42.801
27.96	2020-07-14 15:10:00	1315.17	42.0517	43.5682
27.93	2020-07-14 15:15:00	1260.3	41.8109	43.0865
27.84	2020-07-14 15:20:00	1202.82	41.9982	43.5504
27.78	2020-07-14 15:25:00	1162.02	41.9447	43.5861
27.39	2020-07-14 15:30:00	1111.28	42.1855	44.4246
26.89	2020-07-14 15:35:00	1043.52	42.0249	44.7101
26.42	2020-07-14 15:40:00	1032.98	41.9982	43.5058
26.15	2020-07-14 15:45:00	969.993	42.1677	43.6663
26.1	2020-07-14 15:50:00	952.436	42.7654	44.3443
26.03	2020-07-14 15:55:00	887.128	42.8456	44.38
26.01	2020-07-14 16:00:00	855.304	42.3996	44.2283
26.08	2020-07-14 16:05:00	715.41	42.6405	43.8002
25.97	2020-07-14 16:10:00	150.682	42.3639	45.0401
26.11	2020-07-14 16:15:00	143.548	42.8903	44.5049
25.99	2020-07-14 16:20:00	158.751	42.9973	44.7368
26	2020-07-14 16:25:00	190.102	43.7912	45.1829
25.91	2020-07-14 16:30:00	262.023	43.8804	45.5664
25.73	2020-07-14 16:35:00	272.49	44.487	45.843
25.64	2020-07-14 16:40:00	250.581	45.4772	46.1909
25.06	2020-07-14 16:45:00	52.5645	45.611	48.4835
23.49	2020-07-14 16:50:00	25.7818	48.6797	51.579
22.55	2020-07-14 16:55:00	24.8015	51.7038	53.5593
22.03	2020-07-14 17:00:00	23.4028	53.4523	55.1115
21.76	2020-07-14 17:05:00	21.7583	53.4523	55.4059
21.58	2020-07-14 17:10:00	19.9724	54.1481	55.5308
21.44	2020-07-14 17:15:00	18.0634	53.8894	56.3515
21.29	2020-07-14 17:20:00	16.126	55.7003	58.0999
21.11	2020-07-14 17:25:00	14.0358	53.9875	56.3783
20.99	2020-07-14 17:30:00	11.9396	56.4229	58.6976
20.78	2020-07-14 17:35:00	9.81991	56.6905	63.2739
20.36	2020-07-14 17:40:00	7.79158	59.9287	64.5139
20.14	2020-07-14 17:45:00	5.88829	60.0714	62.7208
19.95	2020-07-14 17:50:00	4.27291	60.5085	63.827
19.63	2020-07-14 17:55:00	3.07562	64.0946	67.1633
19.15	2020-07-14 18:00:00	2.18703	67.4309	69.5094
18.62	2020-07-14 18:05:00	1.62617	69.5273	72.141
18.14	2020-07-14 18:10:00	1.31673	72.2213	73.72
17.75	2020-07-14 18:15:00	1.17051	73.7824	75.0581
17.53	2020-07-14 18:20:00	1.12167	73.1491	75.1116
17.48	2020-07-14 18:25:00	1.11486	73.9787	76.7887
17.32	2020-07-14 18:30:00	1.1194	74.8262	77.1634
17.2	2020-07-14 18:35:00	1.12167	75.6022	77.9573
17.03	2020-07-14 18:40:00	1.12395	73.9252	76.9582
17.11	2020-07-14 18:45:00	1.12623	73.497	74.7548
17.22	2020-07-14 18:50:00	1.12852	70.6156	73.1134
17.35	2020-07-14 18:55:00	1.12852	71.1954	74.0768
17.25	2020-07-14 19:00:00	1.13082	71.7485	76.0304
16.89	2020-07-14 19:05:00	1.13311	76.1642	78.0108
16.59	2020-07-14 19:10:00	1.13541	75.5755	78.5282
16.53	2020-07-14 19:15:00	1.14003	74.9332	76.9849
16.58	2020-07-14 19:20:00	1.14003	72.3997	75.5844
16.81	2020-07-14 19:25:00	1.14003	70.4818	72.257
17.04	2020-07-14 19:30:00	1.13772	69.7057	72.5425
16.89	2020-07-14 19:35:00	1.14003	72.7209	75.1205
16.64	2020-07-14 19:40:00	1.14235	73.0242	76.3605
16.37	2020-07-14 19:45:00	1.14467	75.7004	77.6808
16.3	2020-07-14 19:50:00	1.14467	75.2187	76.1999
16.16	2020-07-14 19:55:00	1.147	76.4497	77.8056
16.19	2020-07-14 20:00:00	1.147	71.3293	77.0028
16.59	2020-07-14 20:05:00	1.147	71.3114	72.6674
16.64	2020-07-14 20:10:00	1.147	70.6602	72.4443
16.63	2020-07-14 20:15:00	1.14467	71.4363	74.0055
16.39	2020-07-14 20:20:00	1.147	74.2017	77.2436
16	2020-07-14 20:25:00	1.14933	77.1188	79.3757
15.71	2020-07-14 20:30:00	1.154	79.3846	80.5264
15.49	2020-07-14 20:35:00	1.15634	80.2231	81.5791
15.32	2020-07-14 20:40:00	1.15869	81.5434	82.9083
15.08	2020-07-14 20:45:00	1.16105	82.4176	83.3543
14.91	2020-07-14 20:50:00	1.16577	82.6674	83.4257
14.73	2020-07-14 20:55:00	1.16814	82.8101	84.3623
14.6	2020-07-14 21:00:00	1.17051	83.6843	84.2731
14.53	2020-07-14 21:05:00	1.17051	83.3989	84.4515
14.52	2020-07-14 21:10:00	1.17289	83.3721	84.1839
14.5	2020-07-14 21:15:00	1.17527	83.9787	84.9868
14.45	2020-07-14 21:20:00	1.17527	84.5407	85.076
14.29	2020-07-14 21:25:00	1.17766	85.1652	85.968
14.15	2020-07-14 21:30:00	1.17766	85.968	86.5033
14.04	2020-07-14 21:35:00	1.18005	86.5033	87.2169
14.01	2020-07-14 21:40:00	1.18005	87.3061	87.8414
13.99	2020-07-14 21:45:00	1.18245	86.9493	87.4845
13.89	2020-07-14 21:50:00	1.18485	87.3061	88.2874
13.82	2020-07-14 21:55:00	1.18485	87.8414	88.2874
13.74	2020-07-14 22:00:00	1.18726	88.1982	88.6442
13.71	2020-07-14 22:05:00	1.18726	88.2874	88.555
13.65	2020-07-14 22:10:00	1.18967	88.2874	88.8226
13.61	2020-07-14 22:15:00	1.18967	88.7334	88.9118
13.58	2020-07-14 22:20:00	1.18967	88.8226	89.2687
13.58	2020-07-14 22:25:00	1.18967	88.8226	89.1795
13.53	2020-07-14 22:30:00	1.19209	88.8226	89.1795
13.53	2020-07-14 22:35:00	1.19209	89.1795	89.4471
13.49	2020-07-14 22:40:00	1.19209	89.0011	89.1795
13.39	2020-07-14 22:45:00	1.19451	88.9118	89.8039
13.35	2020-07-14 22:50:00	1.19451	89.6255	90.1607
13.31	2020-07-14 22:55:00	1.19451	89.5363	89.9823
13.32	2020-07-14 23:00:00	1.19451	89.8931	90.0715
13.29	2020-07-14 23:05:00	1.19694	89.4471	89.9823
13.18	2020-07-14 23:10:00	1.19694	89.6255	89.8931
13.11	2020-07-14 23:15:00	1.19694	89.8931	90.5176
13.06	2020-07-14 23:20:00	1.19937	90.4284	91.0528
13.02	2020-07-14 23:25:00	1.20181	90.4284	90.8744
12.94	2020-07-14 23:30:00	1.20181	90.5176	91.0528
12.91	2020-07-14 23:35:00	1.20181	90.7852	91.4988
12.84	2020-07-14 23:40:00	1.20425	90.7852	91.2312
12.81	2020-07-14 23:45:00	1.20425	91.2312	91.6772
12.8	2020-07-14 23:50:00	1.20425	91.4096	91.6772
12.78	2020-07-14 23:55:00	1.20425	91.3204	91.4988
12.75	2020-07-15	1.20669	90.9636	91.3204
12.67	2020-07-15 00:05:00	1.20915	90.8744	91.4988
12.64	2020-07-15 00:10:00	1.20669	91.2312	91.6772
12.61	2020-07-15 00:15:00	1.20915	91.142	91.4988
12.55	2020-07-15 00:20:00	1.20915	91.142	91.4988
12.51	2020-07-15 00:25:00	1.2116	91.4096	91.8557
12.52	2020-07-15 00:30:00	1.2116	91.2312	91.8557
12.48	2020-07-15 00:35:00	1.2116	91.3204	91.8557
12.44	2020-07-15 00:40:00	1.2116	91.588	91.8557
12.39	2020-07-15 00:45:00	1.21406	91.6772	92.0341
12.41	2020-07-15 00:50:00	1.21406	92.0341	92.2125
12.44	2020-07-15 00:55:00	1.21406	91.2312	92.0341
12.35	2020-07-15 01:00:00	1.21406	91.2312	91.4096
12.26	2020-07-15 01:05:00	1.21406	91.4096	92.2125
12.24	2020-07-15 01:10:00	1.21653	91.8557	92.2125
12.19	2020-07-15 01:15:00	1.21653	91.9449	92.3909
12.15	2020-07-15 01:20:00	1.21653	91.9449	92.2125
12.1	2020-07-15 01:25:00	1.21653	91.9449	92.3909
12.07	2020-07-15 01:30:00	1.219	92.3017	92.3017
12.04	2020-07-15 01:35:00	1.219	92.3017	92.5693
12	2020-07-15 01:40:00	1.219	92.3017	92.6585
12.01	2020-07-15 01:45:00	1.22148	92.4801	92.9261
12	2020-07-15 01:50:00	1.219	92.4801	92.8369
12.01	2020-07-15 01:55:00	1.22148	92.7477	92.8369
12	2020-07-15 02:00:00	1.22148	92.6585	92.9261
11.99	2020-07-15 02:05:00	1.22148	92.4801	92.9261
11.96	2020-07-15 02:10:00	1.22148	92.5693	92.8369
11.94	2020-07-15 02:15:00	1.22148	92.5693	92.8369
11.96	2020-07-15 02:20:00	1.22148	92.7477	93.1045
11.97	2020-07-15 02:25:00	1.22148	92.7477	92.9261
11.95	2020-07-15 02:30:00	1.22148	92.6585	92.9261
11.93	2020-07-15 02:35:00	1.22148	92.6585	93.0153
11.95	2020-07-15 02:40:00	1.22148	92.7477	93.1938
11.96	2020-07-15 02:45:00	1.22148	92.5693	92.9261
11.95	2020-07-15 02:50:00	1.22148	92.3909	92.6585
11.94	2020-07-15 02:55:00	1.22148	92.3017	92.8369
11.95	2020-07-15 03:00:00	1.22148	92.4801	92.9261
12	2020-07-15 03:05:00	1.22148	92.3909	93.0153
12.01	2020-07-15 03:10:00	1.22148	92.2125	92.5693
12	2020-07-15 03:15:00	1.22148	92.0341	92.4801
11.96	2020-07-15 03:20:00	1.22148	92.0341	92.5693
11.94	2020-07-15 03:25:00	1.22148	92.2125	92.4801
11.96	2020-07-15 03:30:00	1.22148	92.4801	92.7477
11.98	2020-07-15 03:35:00	1.22148	92.4801	92.9261
11.96	2020-07-15 03:40:00	1.22148	92.3909	92.5693
11.95	2020-07-15 03:45:00	1.22396	92.3017	92.5693
11.98	2020-07-15 03:50:00	1.22148	92.3017	92.7477
12.02	2020-07-15 03:55:00	1.22148	92.0341	92.5693
12.01	2020-07-15 04:00:00	1.22148	92.1233	92.4801
12.03	2020-07-15 04:05:00	1.22148	92.3017	92.7477
12.04	2020-07-15 04:10:00	1.22396	92.2125	92.7477
11.99	2020-07-15 04:15:00	1.22148	92.3017	92.7477
11.99	2020-07-15 04:20:00	1.22148	92.6585	92.9261
12	2020-07-15 04:25:00	1.22148	92.6585	92.9261
11.98	2020-07-15 04:30:00	1.22148	92.6585	93.1045
12.02	2020-07-15 04:35:00	1.22148	93.0153	93.1938
12.02	2020-07-15 04:40:00	1.22148	92.7477	92.9261
12	2020-07-15 04:45:00	1.22148	92.7477	93.1045
12.11	2020-07-15 04:50:00	1.22148	92.5693	93.283
12.17	2020-07-15 04:55:00	1.22148	92.3909	92.5693
12.15	2020-07-15 05:00:00	1.22148	92.3909	92.5693
12.15	2020-07-15 05:05:00	1.22148	92.3017	92.4801
12.15	2020-07-15 05:10:00	1.219	92.3017	92.6585
12.15	2020-07-15 05:15:00	1.219	92.3909	92.7477
12.18	2020-07-15 05:20:00	1.219	92.6585	92.9261
12.19	2020-07-15 05:25:00	1.219	92.4801	92.6585
12.19	2020-07-15 05:30:00	1.219	92.4801	92.7477
12.2	2020-07-15 05:35:00	1.22148	92.5693	93.0153
12.23	2020-07-15 05:40:00	1.219	92.9261	93.1045
12.24	2020-07-15 05:45:00	1.219	92.6585	93.0153
12.21	2020-07-15 05:50:00	1.219	92.3909	92.7477
12.22	2020-07-15 05:55:00	1.219	92.7477	92.9261
12.25	2020-07-15 06:00:00	1.219	92.7477	93.1938
12.25	2020-07-15 06:05:00	1.219	92.5693	93.1938
12.19	2020-07-15 06:10:00	1.219	92.5693	92.8369
12.17	2020-07-15 06:15:00	1.21653	92.7477	93.1938
12.22	2020-07-15 06:20:00	1.21653	92.5693	93.283
12.27	2020-07-15 06:25:00	1.21653	92.4801	92.9261
12.26	2020-07-15 06:30:00	1.22396	92.2125	92.6585
12.2	2020-07-15 06:35:00	1.25924	92.2125	92.8369
12.2	2020-07-15 06:40:00	1.38808	92.7477	93.3722
12.21	2020-07-15 06:45:00	1.69354	92.7477	93.283
12.18	2020-07-15 06:50:00	2.2455	92.8369	93.1045
12.17	2020-07-15 06:55:00	3.11331	92.9261	93.283
12.22	2020-07-15 07:00:00	4.39606	93.1938	93.6398
12.27	2020-07-15 07:05:00	6.04571	93.283	93.5506
12.34	2020-07-15 07:10:00	7.98367	92.8369	93.4614
12.44	2020-07-15 07:15:00	10.0824	92.6585	93.1938
12.6	2020-07-15 07:20:00	12.3311	92.5693	93.283
12.7	2020-07-15 07:25:00	14.5876	92.3017	92.5693
12.77	2020-07-15 07:30:00	16.8111	92.3017	92.6585
12.85	2020-07-15 07:35:00	19.1118	92.2125	92.6585
12.95	2020-07-15 07:40:00	22.6873	92.3017	92.5693
13.57	2020-07-15 07:45:00	91.1083	87.8414	92.3909
14.99	2020-07-15 07:50:00	140.664	81.5702	87.5737
16.21	2020-07-15 07:55:00	165.461	77.2882	80.018
16.93	2020-07-15 08:00:00	191.03	74.4336	77.208
17.98	2020-07-15 08:05:00	218.19	66.1731	74.4158
19.5	2020-07-15 08:10:00	246.295	62.1053	67.4399
20.46	2020-07-15 08:15:00	267.884	58.2784	62.0607
21.4	2020-07-15 08:20:00	289.361	55.9412	58.3586
22.04	2020-07-15 08:25:00	281.598	54.1749	58.3408
22.48	2020-07-15 08:30:00	263.462	53.4166	55.6468
22.89	2020-07-15 08:35:00	270.561	53.149	54.612
23.15	2020-07-15 08:40:00	302.574	50.7404	54.1124
23.38	2020-07-15 08:45:00	315.109	50.785	52.4621
23.68	2020-07-15 08:50:00	283.548	50.9545	52.694
23.82	2020-07-15 08:55:00	254.889	49.8037	50.9456
23.87	2020-07-15 09:00:00	272.656	49.7502	51.2221
24.07	2020-07-15 09:05:00	318.969	49.9732	51.6414
24.36	2020-07-15 09:10:00	351.607	49.4558	51.1151
24.55	2020-07-15 09:15:00	370.659	49.4737	50.2944
24.67	2020-07-15 09:20:00	417.809	48.8314	50.2141
24.74	2020-07-15 09:25:00	428.11	48.537	50.5977
24.66	2020-07-15 09:30:00	634.675	48.4924	49.9376
24.58	2020-07-15 09:35:00	879.955	49.099	50.7137
24.61	2020-07-15 09:40:00	1152.63	48.7779	50.8564
24.7	2020-07-15 09:45:00	1237.48	48.537	50.4996
24.74	2020-07-15 09:50:00	1273.15	48.2426	49.9643
24.89	2020-07-15 09:55:00	1328.59	48.6797	49.9822
25.22	2020-07-15 10:00:00	1369.65	47.3952	49.1793
25.36	2020-07-15 10:05:00	1394.9	46.9937	48.6351
25.49	2020-07-15 10:10:00	1438.02	46.4942	48.1356
25.85	2020-07-15 10:15:00	1470.48	46.0392	47.6896
26.33	2020-07-15 10:20:00	1506.74	45.1561	47.4309
26.44	2020-07-15 10:25:00	1537.63	44.4692	46.4139
26.64	2020-07-15 10:30:00	1565.97	44.4514	46.4317
26.74	2020-07-15 10:35:00	1591.61	43.818	45.6378
26.77	2020-07-15 10:40:00	1611.11	44.4514	46.3069
26.85	2020-07-15 10:45:00	1634.16	44.6922	46.0571
27.09	2020-07-15 10:50:00	1650.83	44.2105	46.0838
27.1	2020-07-15 10:55:00	1671.05	43.9786	45.5486
26.87	2020-07-15 11:00:00	1691.53	44.7547	45.843
27.05	2020-07-15 11:05:00	1712.25	44.4781	46.9045
27.46	2020-07-15 11:10:00	1726.21	43.4166	45.727
27.61	2020-07-15 11:15:00	1747.36	43.372	45.4237
27.81	2020-07-15 11:20:00	1765.18	43.4344	45.388
28	2020-07-15 11:25:00	1783.18	43.5682	45.6557
27.97	2020-07-15 11:30:00	1801.37	42.5067	44.487
27.81	2020-07-15 11:35:00	1812.37	43.711	46.6458
27.82	2020-07-15 11:40:00	1823.44	43.0508	44.3889
27.73	2020-07-15 11:45:00	1830.86	43.934	45.4059
28.12	2020-07-15 11:50:00	1838.3	43.9786	45.7449
28.41	2020-07-15 11:55:00	1845.78	42.9259	44.2105
28.41	2020-07-15 12:00:00	1853.29	42.1409	43.5682
28.26	2020-07-15 12:05:00	1860.83	42.1677	45.2899
28.42	2020-07-15 12:10:00	1864.61	41.7484	44.603
28.38	2020-07-15 12:15:00	1872.19	42.239	44.5584
28.69	2020-07-15 12:20:00	1879.81	43.1757	44.2908
28.98	2020-07-15 12:25:00	1887.45	42.7029	44.2997
29.17	2020-07-15 12:30:00	1891.29	42.5869	43.9964
29.14	2020-07-15 12:35:00	1898.98	42.5691	43.5861
29	2020-07-15 12:40:00	1902.84	42.9795	43.925
28.91	2020-07-15 12:45:00	1906.7	43.2292	44.4692
28.79	2020-07-15 12:50:00	1902.84	43.5058	44.9688
28.85	2020-07-15 12:55:00	1906.7	43.6217	45.2631
28.8	2020-07-15 13:00:00	1902.84	43.0597	45.0312
28.84	2020-07-15 13:05:00	1898.98	43.1668	44.2997
28.81	2020-07-15 13:10:00	1895.13	43.2738	45.2453
28.62	2020-07-15 13:15:00	1895.13	44.1035	45.6735
28.63	2020-07-15 13:20:00	1887.45	43.6307	44.6833
28.67	2020-07-15 13:25:00	1883.62	43.5147	44.5763
28.7	2020-07-15 13:30:00	1879.81	43.9786	45.6646
28.6	2020-07-15 13:35:00	1875.99	44.0678	45.1026
28.5	2020-07-15 13:40:00	1868.39	44.6833	46.289
28.41	2020-07-15 13:45:00	1857.05	44.3978	45.2275
28.41	2020-07-15 13:50:00	1849.53	44.6655	46.1552
28.38	2020-07-15 13:55:00	1838.3	44.6298	45.9322
28.48	2020-07-15 14:00:00	1823.44	44.5941	46.6637
28.45	2020-07-15 14:05:00	1808.7	44.3354	45.2185
28.42	2020-07-15 14:10:00	1794.07	44.0945	45.5664
28.42	2020-07-15 14:15:00	1772.36	44.942	46.0036
28.39	2020-07-15 14:20:00	1743.81	45.1115	46.4317
28.41	2020-07-15 14:25:00	1719.21	45.4148	46.8243
28.43	2020-07-15 14:30:00	1674.45	45.504	46.9491
28.57	2020-07-15 14:35:00	1640.81	44.8082	46.851
28.67	2020-07-15 14:40:00	1614.38	44.7101	45.9054
28.52	2020-07-15 14:45:00	1569.16	44.9331	45.9143
28.53	2020-07-15 14:50:00	1515.94	45.9143	46.9045
28.36	2020-07-15 14:55:00	1461.56	46.6012	47.9037
28.31	2020-07-15 15:00:00	1406.27	46.4139	47.4576
28.2	2020-07-15 15:05:00	1347.59	46.7797	47.3863
28.1	2020-07-15 15:10:00	1293.99	46.9224	48.1088
27.89	2020-07-15 15:15:00	1234.98	47.1989	48.3586
27.86	2020-07-15 15:20:00	1181.05	47.6628	48.8938
27.77	2020-07-15 15:25:00	1134.07	47.4398	48.8225
27.4	2020-07-15 15:30:00	1091.17	49.099	50.7939
26.96	2020-07-15 15:35:00	1049.89	50.9099	52.7743
26.62	2020-07-15 15:40:00	1016.35	52.7297	53.5058
26.47	2020-07-15 15:45:00	962.151	52.8457	53.8805
26.37	2020-07-15 15:50:00	940.909	53.5861	54.6387
26.31	2020-07-15 15:55:00	903.481	53.8805	54.6209
26.33	2020-07-15 16:00:00	822.95	54.3265	54.8618
26.4	2020-07-15 16:05:00	728.598	53.2917	55.5219
26.43	2020-07-15 16:10:00	180.843	53.2739	54.2908
26.42	2020-07-15 16:15:00	152.467	53.2828	54.4603
26.38	2020-07-15 16:20:00	166.337	53.2025	54.5495
26.34	2020-07-15 16:25:00	190.372	53.1936	54.5674
26.23	2020-07-15 16:30:00	256.03	53.1044	53.5147
26.04	2020-07-15 16:35:00	266.528	53.2828	54.4157
25.81	2020-07-15 16:40:00	250.53	53.6307	54.4246
25.35	2020-07-15 16:45:00	77.1403	54.2016	56.7083
23.98	2020-07-15 16:50:00	31.1692	56.9492	60.6869
23.05	2020-07-15 16:55:00	28.7738	60.7583	63.0509
22.52	2020-07-15 17:00:00	26.9207	63.0777	64.5853
22.2	2020-07-15 17:05:00	26.0765	64.4158	64.835
22.02	2020-07-15 17:10:00	24.3377	64.8261	65.7093
21.87	2020-07-15 17:15:00	21.1102	65.6468	66.976
21.72	2020-07-15 17:20:00	17.8883	66.86	67.1812
21.58	2020-07-15 17:25:00	14.6499	67.0652	67.4131
21.45	2020-07-15 17:30:00	12.2141	67.315	67.8502
21.34	2020-07-15 17:35:00	10.0212	67.6183	68.0911
21.23	2020-07-15 17:40:00	7.95133	67.8948	68.5639
21.13	2020-07-15 17:45:00	6.02122	68.1267	69.1169
20.93	2020-07-15 17:50:00	4.38715	69.2418	72.5425
20.46	2020-07-15 17:55:00	3.07562	72.6763	75.5487
19.89	2020-07-15 18:00:00	2.12145	75.7004	77.5291
19.39	2020-07-15 18:05:00	1.58705	77.6094	79.9377
18.99	2020-07-15 18:10:00	1.27985	80.009	81.0617
18.65	2020-07-15 18:15:00	1.14933	81.1241	83.0064
18.35	2020-07-15 18:20:00	1.11035	83.0242	83.4703
18.14	2020-07-15 18:25:00	1.10585	83.497	83.8003
17.96	2020-07-15 18:30:00	1.10585	83.9074	85.2544
17.79	2020-07-15 18:35:00	1.1081	84.8976	85.8788
17.61	2020-07-15 18:40:00	1.1126	85.968	86.5033
17.45	2020-07-15 18:45:00	1.11713	86.3249	87.1277
17.32	2020-07-15 18:50:00	1.12167	86.9493	87.3953
17.18	2020-07-15 18:55:00	1.12395	87.3953	87.9306
17.06	2020-07-15 19:00:00	1.12623	87.9306	88.555
16.96	2020-07-15 19:05:00	1.12852	88.4658	88.7334
16.82	2020-07-15 19:10:00	1.13082	88.2874	89.0903
16.71	2020-07-15 19:15:00	1.13311	89.0011	89.4471
16.62	2020-07-15 19:20:00	1.13541	89.0903	89.7147
16.55	2020-07-15 19:25:00	1.13772	89.3579	89.7147
16.46	2020-07-15 19:30:00	1.13772	89.2687	89.6255
16.35	2020-07-15 19:35:00	1.14003	89.5363	89.9823
16.27	2020-07-15 19:40:00	1.14235	89.3579	89.8039
16.16	2020-07-15 19:45:00	1.14467	89.5363	90.5176
16.12	2020-07-15 19:50:00	1.14467	90.1607	90.6068
16.07	2020-07-15 19:55:00	1.147	90.1607	90.4284
15.99	2020-07-15 20:00:00	1.147	90.1607	90.5176
15.97	2020-07-15 20:05:00	1.14933	89.4471	90.696
16.22	2020-07-15 20:10:00	1.14933	87.2169	89.3579
16.59	2020-07-15 20:15:00	1.147	82.3106	87.0385
17.1	2020-07-15 20:20:00	1.14235	78.6442	82.1946
17.6	2020-07-15 20:25:00	1.14003	76.0483	78.4569
17.87	2020-07-15 20:30:00	1.13772	74.2374	76.1018
18.08	2020-07-15 20:35:00	1.13311	72.3551	74.3266
18.24	2020-07-15 20:40:00	1.13082	72.0518	72.6674
18.31	2020-07-15 20:45:00	1.12852	71.6326	72.2124
18.33	2020-07-15 20:50:00	1.12852	70.4996	71.8199
18.35	2020-07-15 20:55:00	1.12623	70.5086	71.4095
18.34	2020-07-15 21:00:00	1.12623	69.7771	70.8386
18.35	2020-07-15 21:05:00	1.12395	69.7503	70.5442
18.25	2020-07-15 21:10:00	1.12395	70.0447	72.7387
17.85	2020-07-15 21:15:00	1.12852	72.8547	76.0304
17.39	2020-07-15 21:20:00	1.13082	75.1651	76.9939
17.03	2020-07-15 21:25:00	1.13541	77.0742	77.7254
16.8	2020-07-15 21:30:00	1.13541	77.6272	78.1
16.76	2020-07-15 21:35:00	1.14003	77.1544	77.6451
16.7	2020-07-15 21:40:00	1.14235	77.5113	79.8931
16.46	2020-07-15 21:45:00	1.14467	79.8574	81.0171
16.15	2020-07-15 21:50:00	1.147	81.1687	83.5238
15.85	2020-07-15 21:55:00	1.15166	83.613	85.2544
15.63	2020-07-15 22:00:00	1.15634	85.2544	86.0572
15.43	2020-07-15 22:05:00	1.15869	86.2357	87.3953
15.25	2020-07-15 22:10:00	1.16105	87.3953	88.3766
15.14	2020-07-15 22:15:00	1.16341	88.2874	88.555
15.07	2020-07-15 22:20:00	1.16577	88.1982	89.0011
15.01	2020-07-15 22:25:00	1.16577	88.555	89.1795
14.92	2020-07-15 22:30:00	1.16814	88.6442	89.4471
14.83	2020-07-15 22:35:00	1.17051	89.1795	90.2499
14.74	2020-07-15 22:40:00	1.17051	89.9823	90.2499
14.63	2020-07-15 22:45:00	1.17289	90.1607	90.6068
14.55	2020-07-15 22:50:00	1.17527	90.696	90.7852
14.45	2020-07-15 22:55:00	1.17527	90.6068	90.9636
14.39	2020-07-15 23:00:00	1.17766	90.9636	91.4096
14.33	2020-07-15 23:05:00	1.18005	91.2312	91.588
14.26	2020-07-15 23:10:00	1.18005	91.2312	91.588
14.22	2020-07-15 23:15:00	1.18005	91.588	92.0341
14.18	2020-07-15 23:20:00	1.18245	91.6772	91.9449
14.15	2020-07-15 23:25:00	1.18245	91.8557	92.1233
14.11	2020-07-15 23:30:00	1.18485	91.8557	92.3909
14.11	2020-07-15 23:35:00	1.18485	91.9449	92.3909
14.1	2020-07-15 23:40:00	1.18485	92.1233	92.4801
14.07	2020-07-15 23:45:00	1.18485	91.7665	92.2125
13.99	2020-07-15 23:50:00	1.18726	91.7665	92.2125
13.93	2020-07-15 23:55:00	1.18726	92.1233	92.3909
13.88	2020-07-16	1.18967	92.3017	92.7477
13.88	2020-07-16 00:05:00	1.18967	92.6585	92.8369
13.85	2020-07-16 00:10:00	1.18967	92.5693	92.8369
13.82	2020-07-16 00:15:00	1.19209	92.5693	93.0153
13.79	2020-07-16 00:20:00	1.19209	92.6585	92.9261
13.8	2020-07-16 00:25:00	1.19209	92.7477	92.9261
13.79	2020-07-16 00:30:00	1.19209	92.7477	92.8369
13.76	2020-07-16 00:35:00	1.19451	92.5693	92.7477
13.72	2020-07-16 00:40:00	1.19209	92.0341	93.0153
13.61	2020-07-16 00:45:00	1.19451	92.2125	92.8369
13.57	2020-07-16 00:50:00	1.19451	92.3909	93.0153
13.5	2020-07-16 00:55:00	1.19694	92.4801	93.1938
13.45	2020-07-16 01:00:00	1.19694	92.4801	93.1045
13.36	2020-07-16 01:05:00	1.19937	92.3909	92.5693
13.28	2020-07-16 01:10:00	1.19937	92.4801	92.8369
13.27	2020-07-16 01:15:00	1.19937	92.8369	93.3722
13.24	2020-07-16 01:20:00	1.20181	92.3909	93.1938
13.15	2020-07-16 01:25:00	1.20425	92.3017	92.9261
13.11	2020-07-16 01:30:00	1.20425	92.8369	93.0153
13.06	2020-07-16 01:35:00	1.20425	92.9261	93.1045
13	2020-07-16 01:40:00	1.20669	92.3017	93.3722
12.87	2020-07-16 01:45:00	1.20669	92.4801	93.1045
12.83	2020-07-16 01:50:00	1.20915	93.1938	93.6398
12.82	2020-07-16 01:55:00	1.20915	92.9261	93.6398
12.77	2020-07-16 02:00:00	1.20915	93.0153	93.4614
12.73	2020-07-16 02:05:00	1.2116	93.1938	93.5506
12.72	2020-07-16 02:10:00	1.2116	93.4614	93.9074
12.72	2020-07-16 02:15:00	1.2116	93.6398	93.8182
12.72	2020-07-16 02:20:00	1.2116	93.6398	93.9074
12.72	2020-07-16 02:25:00	1.21406	93.5506	93.9966
12.69	2020-07-16 02:30:00	1.2116	92.9261	93.9074
12.58	2020-07-16 02:35:00	1.21406	92.9261	93.4614
12.52	2020-07-16 02:40:00	1.21406	93.3722	93.5506
12.46	2020-07-16 02:45:00	1.21406	93.3722	93.9074
12.46	2020-07-16 02:50:00	1.21406	93.8182	94.2642
12.49	2020-07-16 02:55:00	1.21406	93.729	94.3534
12.45	2020-07-16 03:00:00	1.21653	93.8182	93.9966
12.43	2020-07-16 03:05:00	1.21653	93.8182	94.0858
12.43	2020-07-16 03:10:00	1.21653	93.8182	94.175
12.4	2020-07-16 03:15:00	1.219	93.729	94.0858
12.35	2020-07-16 03:20:00	1.219	93.6398	93.9966
12.26	2020-07-16 03:25:00	1.219	93.4614	93.729
12.27	2020-07-16 03:30:00	1.219	93.729	94.2642
12.34	2020-07-16 03:35:00	1.219	94.2642	94.6211
12.34	2020-07-16 03:40:00	1.219	94.2642	94.4426
12.29	2020-07-16 03:45:00	1.219	93.9966	94.2642
12.23	2020-07-16 03:50:00	1.219	93.9966	94.0858
12.17	2020-07-16 03:55:00	1.22148	93.9074	94.175
12.08	2020-07-16 04:00:00	1.22148	93.8182	93.9966
12.04	2020-07-16 04:05:00	1.22396	93.9074	94.4426
11.94	2020-07-16 04:10:00	1.22396	93.729	94.0858
11.86	2020-07-16 04:15:00	1.22396	93.729	94.175
11.8	2020-07-16 04:20:00	1.22645	93.9074	94.175
11.75	2020-07-16 04:25:00	1.22645	93.9966	94.3534
11.76	2020-07-16 04:30:00	1.22645	94.2642	94.6211
11.72	2020-07-16 04:35:00	1.22645	94.2642	94.5319
11.68	2020-07-16 04:40:00	1.22894	94.2642	94.4426
11.69	2020-07-16 04:45:00	1.22894	94.3534	94.6211
11.67	2020-07-16 04:50:00	1.22894	94.3534	94.6211
11.69	2020-07-16 04:55:00	1.22894	94.4426	94.7103
11.73	2020-07-16 05:00:00	1.22645	94.4426	94.7995
11.73	2020-07-16 05:05:00	1.22894	94.4426	94.9779
11.77	2020-07-16 05:10:00	1.22894	94.4426	94.9779
11.69	2020-07-16 05:15:00	1.22894	94.175	94.4426
11.66	2020-07-16 05:20:00	1.22894	94.3534	94.6211
11.61	2020-07-16 05:25:00	1.23143	94.2642	94.5319
11.55	2020-07-16 05:30:00	1.23143	94.3534	94.5319
11.53	2020-07-16 05:35:00	1.23143	94.5319	94.6211
11.47	2020-07-16 05:40:00	1.23143	94.3534	94.6211
11.42	2020-07-16 05:45:00	1.23394	94.4426	94.7103
11.32	2020-07-16 05:50:00	1.23394	94.175	94.5319
11.2	2020-07-16 05:55:00	1.23644	93.9966	94.4426
11.18	2020-07-16 06:00:00	1.23644	94.4426	94.8887
11.2	2020-07-16 06:05:00	1.23394	94.7103	94.8887
11.12	2020-07-16 06:10:00	1.23644	94.175	94.7995
11.01	2020-07-16 06:15:00	1.23644	94.175	94.3534
10.95	2020-07-16 06:20:00	1.23644	94.3534	94.4426
10.88	2020-07-16 06:25:00	1.24147	94.3534	94.6211
10.85	2020-07-16 06:30:00	1.25159	94.4426	94.6211
10.77	2020-07-16 06:35:00	1.3008	94.3534	94.5319
10.76	2020-07-16 06:40:00	1.44559	94.5319	94.7995
10.74	2020-07-16 06:45:00	1.75299	94.5319	94.7995
10.71	2020-07-16 06:50:00	2.32905	94.4426	94.7103
10.72	2020-07-16 06:55:00	3.23571	94.6211	94.8887
10.71	2020-07-16 07:00:00	4.53195	94.5319	94.7103
10.72	2020-07-16 07:05:00	6.08263	94.4426	94.7995
10.74	2020-07-16 07:10:00	7.88704	94.4426	94.7103
10.78	2020-07-16 07:15:00	9.8	94.4426	94.7103
10.79	2020-07-16 07:20:00	11.9033	94.3534	94.4426
10.83	2020-07-16 07:25:00	14.1445	94.4426	94.5319
10.89	2020-07-16 07:30:00	16.317	94.4426	94.6211
10.99	2020-07-16 07:35:00	18.3479	94.5319	94.7995
11.17	2020-07-16 07:40:00	21.9892	94.7103	95.0671
11.88	2020-07-16 07:45:00	109.123	91.588	94.7995
13.38	2020-07-16 07:50:00	161.022	87.2169	91.2312
14.23	2020-07-16 07:55:00	185.452	84.6299	87.0385
14.82	2020-07-16 08:00:00	207.774	83.3275	86.5033
15.37	2020-07-16 08:05:00	246.895	80.9457	83.158
15.91	2020-07-16 08:10:00	291.128	80.6246	81.0171
16.54	2020-07-16 08:15:00	310.034	79.2954	80.7673
17.17	2020-07-16 08:20:00	323.533	78.0911	80.8476
17.71	2020-07-16 08:25:00	320.267	76.9671	78.3676
18.21	2020-07-16 08:30:00	282.973	76.3873	77.4934
18.5	2020-07-16 08:35:00	264.427	76.1732	77.9127
18.74	2020-07-16 08:40:00	246.745	69.8841	78.1892
19.21	2020-07-16 08:45:00	242.722	61.5612	72.6317
19.88	2020-07-16 08:50:00	236.21	67.1098	71.8823
20.34	2020-07-16 08:55:00	211.39	54.3533	65.1473
21.15	2020-07-16 09:00:00	188.106	49.4648	57.3863
21.83	2020-07-16 09:05:00	187.268	47.0027	50.0357
22.27	2020-07-16 09:10:00	220.505	45.611	50.7404
22.48	2020-07-16 09:15:00	259.588	44.264	47.8858
22.76	2020-07-16 09:20:00	358.816	42.7118	46.7529
22.98	2020-07-16 09:25:00	628.267	40.8117	44.9063
23.15	2020-07-16 09:30:00	827.976	40.446	44.6387
23.23	2020-07-16 09:35:00	940.909	41.2489	43.5147
23.23	2020-07-16 09:40:00	1093.38	41.4094	42.7475
23.33	2020-07-16 09:45:00	1115.8	40.9456	42.801
23.62	2020-07-16 09:50:00	1178.65	40.562	42.7208
23.83	2020-07-16 09:55:00	1242.52	39.3755	42.2747
23.99	2020-07-16 10:00:00	1283.53	38.8492	40.5887
24.22	2020-07-16 10:05:00	1323.2	38.7154	40.7671
24.91	2020-07-16 10:10:00	1361.34	37.6984	40.2943
25.25	2020-07-16 10:15:00	1397.74	37.1454	38.2158
25.47	2020-07-16 10:20:00	1435.1	36.1462	38.2248
25.71	2020-07-16 10:25:00	1464.53	36.7172	38.5013
25.91	2020-07-16 10:30:00	1494.56	36.5298	38.9027
26.12	2020-07-16 10:35:00	1506.74	36.958	38.7065
26.38	2020-07-16 10:40:00	1540.75	37.0472	38.2694
26.38	2020-07-16 10:45:00	1562.8	36.3603	37.6806
26.56	2020-07-16 10:50:00	1581.95	36.7528	38.7689
26.87	2020-07-16 10:55:00	1604.58	36.5209	38.1891
26.86	2020-07-16 11:00:00	1627.54	36.7261	38.1623
26.9	2020-07-16 11:05:00	1654.18	36.7885	38.7689
26.8	2020-07-16 11:10:00	1671.05	36.6547	38.5191
26.98	2020-07-16 11:15:00	1688.1	36.7528	39.0811
27.07	2020-07-16 11:20:00	1705.31	36.8421	37.9571
27.19	2020-07-16 11:25:00	1722.71	36.6458	38.0017
27.26	2020-07-16 11:30:00	1736.75	36.4674	38.3942
27.52	2020-07-16 11:35:00	1750.91	37.5735	40.9723
27.42	2020-07-16 11:40:00	1765.18	37.1275	40.5263
27.29	2020-07-16 11:45:00	1775.96	36.735	38.876
27.48	2020-07-16 11:50:00	1783.18	36.057	38.9473
27.61	2020-07-16 11:55:00	1794.07	35.5307	36.7975
27.78	2020-07-16 12:00:00	1797.72	33.2203	36.5923
27.77	2020-07-16 12:05:00	1801.37	33.5771	35.7983
27.89	2020-07-16 12:10:00	1808.7	33.3184	38.7422
28.29	2020-07-16 12:15:00	1816.05	37.5735	38.7689
28.38	2020-07-16 12:20:00	1819.74	37.2702	38.9652
28.4	2020-07-16 12:25:00	1823.44	36.6726	37.8858
28.23	2020-07-16 12:30:00	1827.14	36.5834	38.3764
28.34	2020-07-16 12:35:00	1830.86	37.4487	38.5727
28.55	2020-07-16 12:40:00	1838.3	37.0383	38.9206
28.71	2020-07-16 12:45:00	1838.3	36.4495	38.0553
28.67	2020-07-16 12:50:00	1842.04	36.7796	38.1623
28.75	2020-07-16 12:55:00	1845.78	36.3068	38.0909
28.62	2020-07-16 13:00:00	1849.53	35.8608	37.7609
28.3	2020-07-16 13:05:00	1845.78	36.8777	38.5994
28.67	2020-07-16 13:10:00	1838.3	35.9678	37.2435
28.85	2020-07-16 13:15:00	1842.04	35.9678	37.9661
28.97	2020-07-16 13:20:00	1845.78	35.6467	37.0115
28.94	2020-07-16 13:25:00	1845.78	35.7983	36.9313
29.02	2020-07-16 13:30:00	1842.04	35.8429	36.8153
29	2020-07-16 13:35:00	1842.04	35.3523	37.7787
29.04	2020-07-16 13:40:00	1827.14	35.5486	36.3693
29.02	2020-07-16 13:45:00	1819.74	34.6476	36.1016
29.04	2020-07-16 13:50:00	1816.05	33.8715	35.6645
28.79	2020-07-16 13:55:00	1808.7	34.1748	36.1284
28.95	2020-07-16 14:00:00	1797.72	34.8528	36.1016
29.15	2020-07-16 14:05:00	1779.57	34.9063	36.2087
29.33	2020-07-16 14:10:00	1761.6	34.6119	35.5307
29.16	2020-07-16 14:15:00	1747.36	34.1302	35.1828
29.15	2020-07-16 14:20:00	1722.71	34.7814	35.7091
29.32	2020-07-16 14:25:00	1698.41	35.272	37.2078
29.2	2020-07-16 14:30:00	1671.05	36.9491	38.0909
29.04	2020-07-16 14:35:00	1634.16	36.0749	38.3407
29.14	2020-07-16 14:40:00	1598.08	37.6271	38.4567
28.92	2020-07-16 14:45:00	1550.16	37.2881	38.4299
28.63	2020-07-16 14:50:00	1497.59	37.4665	38.7689
28.7	2020-07-16 14:55:00	1440.94	37.9839	39.1882
28.69	2020-07-16 15:00:00	1386.43	37.9036	39.1168
28.55	2020-07-16 15:05:00	1331.28	38.3942	38.9919
28.36	2020-07-16 15:10:00	1275.74	38.4745	39.2863
28.25	2020-07-16 15:15:00	1222.51	38.0642	38.8849
28.34	2020-07-16 15:20:00	1169.12	37.9393	38.8938
28.3	2020-07-16 15:25:00	1120.34	38.7154	39.5004
28.12	2020-07-16 15:30:00	1082.34	38.5637	40.4638
27.62	2020-07-16 15:35:00	1043.52	40.33	41.3113
27.14	2020-07-16 15:40:00	1004.04	40.9902	42.7386
26.79	2020-07-16 15:45:00	966.064	41.9536	42.7564
26.65	2020-07-16 15:50:00	923.878	42.6048	44.0053
26.68	2020-07-16 15:55:00	885.329	42.6137	43.6931
26.58	2020-07-16 16:00:00	846.669	42.9705	44.3265
26.7	2020-07-16 16:05:00	801.521	42.801	43.5682
26.75	2020-07-16 16:10:00	190.643	42.6851	44.0767
26.68	2020-07-16 16:15:00	140.521	43.1222	44.0143
26.65	2020-07-16 16:20:00	150.805	43.6574	45.1561
26.68	2020-07-16 16:25:00	171.096	42.5245	44.5763
26.69	2020-07-16 16:30:00	235.97	41.793	43.7645
26.6	2020-07-16 16:35:00	253.291	40.9188	42.4799
26.26	2020-07-16 16:40:00	233.683	41.1507	41.8376
25.83	2020-07-16 16:45:00	99.8008	41.4897	42.9616
24.4	2020-07-16 16:50:00	26.8825	42.9884	46.6012
23.32	2020-07-16 16:55:00	25.4232	46.5566	48.769
22.71	2020-07-16 17:00:00	23.9895	48.6173	50.0535
22.34	2020-07-16 17:05:00	22.2676	50.2944	54.1213
21.94	2020-07-16 17:10:00	20.3405	52.4086	56.0393
21.32	2020-07-16 17:15:00	18.3033	55.7092	60.8921
20.48	2020-07-16 17:20:00	16.3236	61.0705	65.3792
19.66	2020-07-16 17:25:00	14.312	65.4595	67.868
19.17	2020-07-16 17:30:00	12.2662	67.7432	69.1526
18.74	2020-07-16 17:35:00	10.144	69.224	70.8921
18.3	2020-07-16 17:40:00	8.0651	70.9635	73.4524
17.89	2020-07-16 17:45:00	6.11978	73.5327	74.8351
17.53	2020-07-16 17:50:00	4.45896	74.6567	75.8163
17.25	2020-07-16 17:55:00	3.20304	75.5933	77.1098
16.95	2020-07-16 18:00:00	2.30086	76.9136	78.5817
16.64	2020-07-16 18:05:00	1.71081	78.6085	79.6968
16.34	2020-07-16 18:10:00	1.37686	79.7147	81.0617
16.05	2020-07-16 18:15:00	1.219	80.7584	81.9181
15.81	2020-07-16 18:20:00	1.15869	81.9627	82.8904
15.63	2020-07-16 18:25:00	1.147	82.0162	83.2829
15.43	2020-07-16 18:30:00	1.147	83.3543	84.0144
15.23	2020-07-16 18:35:00	1.15166	83.7736	84.3623
14.97	2020-07-16 18:40:00	1.15634	84.0055	85.8788
14.82	2020-07-16 18:45:00	1.15869	85.7004	86.2357
14.69	2020-07-16 18:50:00	1.16341	85.7004	86.6817
14.62	2020-07-16 18:55:00	1.16814	86.2357	86.5925
14.49	2020-07-16 19:00:00	1.17051	86.5033	86.7709
14.35	2020-07-16 19:05:00	1.17289	86.8601	87.4845
14.26	2020-07-16 19:10:00	1.17527	87.1277	87.4845
14.18	2020-07-16 19:15:00	1.17766	87.3953	87.663
14.1	2020-07-16 19:20:00	1.17766	87.4845	88.109
14.01	2020-07-16 19:25:00	1.18005	87.3953	87.7522
13.91	2020-07-16 19:30:00	1.18245	87.8414	88.7334
13.84	2020-07-16 19:35:00	1.18485	87.5737	88.8226
13.74	2020-07-16 19:40:00	1.18726	87.8414	88.1982
13.6	2020-07-16 19:45:00	1.18967	87.9306	88.555
13.47	2020-07-16 19:50:00	1.18967	88.555	89.0903
13.35	2020-07-16 19:55:00	1.19451	89.0903	89.4471
13.27	2020-07-16 20:00:00	1.19451	88.7334	89.3579
13.17	2020-07-16 20:05:00	1.19694	89.1795	89.4471
13.08	2020-07-16 20:10:00	1.19937	89.2687	89.8039
13	2020-07-16 20:15:00	1.19937	89.1795	89.5363
12.91	2020-07-16 20:20:00	1.20181	89.3579	89.8039
12.81	2020-07-16 20:25:00	1.20425	89.6255	90.1607
12.72	2020-07-16 20:30:00	1.20669	89.7147	90.0715
12.66	2020-07-16 20:35:00	1.20669	90.0715	90.5176
12.6	2020-07-16 20:40:00	1.20915	89.9823	90.5176
12.54	2020-07-16 20:45:00	1.2116	90.2499	90.5176
12.5	2020-07-16 20:50:00	1.2116	90.1607	90.4284
12.46	2020-07-16 20:55:00	1.2116	90.0715	90.4284
12.39	2020-07-16 21:00:00	1.2116	89.9823	90.4284
12.33	2020-07-16 21:05:00	1.21406	89.8931	90.2499
12.27	2020-07-16 21:10:00	1.21406	89.8931	90.3391
12.23	2020-07-16 21:15:00	1.21653	89.5363	90.4284
12.17	2020-07-16 21:20:00	1.21653	89.7147	90.1607
12.1	2020-07-16 21:25:00	1.219	89.8039	90.3391
12.05	2020-07-16 21:30:00	1.219	90.0715	90.696
12.03	2020-07-16 21:35:00	1.22148	89.9823	90.4284
11.97	2020-07-16 21:40:00	1.22148	89.4471	90.3391
11.92	2020-07-16 21:45:00	1.22148	90.3391	90.696
11.89	2020-07-16 21:50:00	1.22396	90.6068	90.8744
11.84	2020-07-16 21:55:00	1.22396	90.4284	90.7852
11.81	2020-07-16 22:00:00	1.22645	90.4284	90.7852
11.76	2020-07-16 22:05:00	1.22645	90.5176	91.0528
11.73	2020-07-16 22:10:00	1.22645	90.7852	91.4988
11.68	2020-07-16 22:15:00	1.22894	90.7852	91.2312
11.62	2020-07-16 22:20:00	1.22894	91.142	91.4096
11.57	2020-07-16 22:25:00	1.23143	91.3204	91.7665
11.57	2020-07-16 22:30:00	1.22894	91.4096	91.8557
11.51	2020-07-16 22:35:00	1.23143	91.2312	91.3204
11.4	2020-07-16 22:40:00	1.23394	90.9636	91.6772
11.36	2020-07-16 22:45:00	1.23394	91.6772	92.1233
11.34	2020-07-16 22:50:00	1.23394	91.3204	92.1233
11.26	2020-07-16 22:55:00	1.23644	91.6772	91.8557
11.22	2020-07-16 23:00:00	1.23644	91.8557	92.2125
11.19	2020-07-16 23:05:00	1.23644	92.0341	92.3017
11.18	2020-07-16 23:10:00	1.23644	92.2125	92.5693
11.17	2020-07-16 23:15:00	1.23896	92.2125	92.5693
11.13	2020-07-16 23:20:00	1.23896	91.9449	92.5693
11.07	2020-07-16 23:25:00	1.23896	91.9449	92.6585
11.05	2020-07-16 23:30:00	1.23896	92.3017	92.7477
11.03	2020-07-16 23:35:00	1.23896	92.5693	92.8369
11.02	2020-07-16 23:40:00	1.24147	92.6585	92.8369
10.96	2020-07-16 23:45:00	1.24147	92.2125	92.6585
10.92	2020-07-16 23:50:00	1.24147	92.5693	92.7477
10.88	2020-07-16 23:55:00	1.24147	92.5693	93.0153
10.87	2020-07-17	1.24399	92.7477	93.1045
10.82	2020-07-17 00:05:00	1.24399	92.6585	92.8369
10.8	2020-07-17 00:10:00	1.24399	92.7477	93.4614
10.84	2020-07-17 00:15:00	1.24399	93.283	93.4614
10.87	2020-07-17 00:20:00	1.24147	93.283	93.4614
10.86	2020-07-17 00:25:00	1.24399	93.0153	93.283
10.86	2020-07-17 00:30:00	1.24399	93.283	93.3722
10.86	2020-07-17 00:35:00	1.24652	93.1045	93.3722
10.83	2020-07-17 00:40:00	1.24399	92.9261	93.3722
10.8	2020-07-17 00:45:00	1.24652	92.9261	93.283
10.79	2020-07-17 00:50:00	1.24652	93.0153	93.283
10.76	2020-07-17 00:55:00	1.24652	93.1045	93.3722
10.76	2020-07-17 01:00:00	1.24652	93.1938	93.6398
10.72	2020-07-17 01:05:00	1.24652	93.1045	93.729
10.77	2020-07-17 01:10:00	1.24652	93.8182	93.9966
10.79	2020-07-17 01:15:00	1.24652	93.6398	93.8182
10.75	2020-07-17 01:20:00	1.24652	93.1045	93.6398
10.69	2020-07-17 01:25:00	1.24652	93.1045	93.5506
10.68	2020-07-17 01:30:00	1.24905	93.5506	93.729
10.67	2020-07-17 01:35:00	1.24652	93.5506	93.9074
10.7	2020-07-17 01:40:00	1.24905	93.9074	94.0858
10.73	2020-07-17 01:45:00	1.24652	93.9966	94.2642
10.77	2020-07-17 01:50:00	1.24652	93.9074	94.2642
10.78	2020-07-17 01:55:00	1.24652	93.6398	94.2642
10.75	2020-07-17 02:00:00	1.24652	93.6398	93.8182
10.71	2020-07-17 02:05:00	1.24652	93.4614	93.8182
10.7	2020-07-17 02:10:00	1.24652	93.283	93.9966
10.64	2020-07-17 02:15:00	1.24652	93.3722	93.8182
10.62	2020-07-17 02:20:00	1.24652	93.4614	93.9074
10.62	2020-07-17 02:25:00	1.24905	93.729	93.9074
10.58	2020-07-17 02:30:00	1.24905	93.4614	93.9966
10.54	2020-07-17 02:35:00	1.24905	93.6398	93.8182
10.55	2020-07-17 02:40:00	1.24905	93.8182	94.2642
10.53	2020-07-17 02:45:00	1.25159	93.729	94.2642
10.55	2020-07-17 02:50:00	1.24905	93.9966	94.2642
10.59	2020-07-17 02:55:00	1.24905	93.8182	94.5319
10.54	2020-07-17 03:00:00	1.24905	93.8182	94.0858
10.55	2020-07-17 03:05:00	1.25159	94.0858	94.175
10.5	2020-07-17 03:10:00	1.25159	93.3722	94.0858
10.44	2020-07-17 03:15:00	1.25159	93.3722	94.175
10.48	2020-07-17 03:20:00	1.24905	94.175	94.5319
10.54	2020-07-17 03:25:00	1.25159	94.3534	94.6211
10.54	2020-07-17 03:30:00	1.25159	94.0858	94.4426
10.51	2020-07-17 03:35:00	1.25159	93.9966	94.2642
10.49	2020-07-17 03:40:00	1.25159	94.175	94.5319
10.49	2020-07-17 03:45:00	1.25159	94.3534	94.6211
10.46	2020-07-17 03:50:00	1.25159	94.3534	94.5319
10.47	2020-07-17 03:55:00	1.25159	94.5319	94.7995
10.45	2020-07-17 04:00:00	1.25159	94.4426	94.7103
10.41	2020-07-17 04:05:00	1.25159	94.3534	94.6211
10.46	2020-07-17 04:10:00	1.25159	94.6211	94.8887
10.42	2020-07-17 04:15:00	1.25159	94.4426	94.7103
10.34	2020-07-17 04:20:00	1.25413	94.175	94.5319
10.33	2020-07-17 04:25:00	1.25159	94.4426	94.7995
10.32	2020-07-17 04:30:00	1.25413	94.6211	94.7995
10.27	2020-07-17 04:35:00	1.25413	94.4426	94.6211
10.2	2020-07-17 04:40:00	1.25413	94.2642	94.6211
10.15	2020-07-17 04:45:00	1.25413	94.3534	94.7103
10.17	2020-07-17 04:50:00	1.25668	94.7103	95.0671
10.18	2020-07-17 04:55:00	1.25668	94.7995	95.1563
10.21	2020-07-17 05:00:00	1.25668	95.0671	95.1563
10.18	2020-07-17 05:05:00	1.25668	94.7995	95.2455
10.19	2020-07-17 05:10:00	1.25413	94.4426	95.2455
10.07	2020-07-17 05:15:00	1.25668	94.4426	94.7103
10.04	2020-07-17 05:20:00	1.25668	94.6211	94.8887
10.06	2020-07-17 05:25:00	1.25924	94.7995	95.1563
10.02	2020-07-17 05:30:00	1.25668	94.7103	95.0671
9.99	2020-07-17 05:35:00	1.25924	94.7995	95.0671
9.94	2020-07-17 05:40:00	1.25924	94.6211	95.0671
9.94	2020-07-17 05:45:00	1.25924	94.7995	95.1563
9.98	2020-07-17 05:50:00	1.25924	95.1563	95.3347
9.97	2020-07-17 05:55:00	1.25924	95.0671	95.3347
10	2020-07-17 06:00:00	1.25924	95.0671	95.3347
9.97	2020-07-17 06:05:00	1.25924	94.9779	95.2455
9.95	2020-07-17 06:10:00	1.25668	94.8887	95.2455
9.97	2020-07-17 06:15:00	1.25668	95.2455	95.2455
9.99	2020-07-17 06:20:00	1.25668	95.2455	95.3347
9.95	2020-07-17 06:25:00	1.25924	94.8887	95.2455
9.93	2020-07-17 06:30:00	1.27208	94.8887	95.3347
9.86	2020-07-17 06:35:00	1.32209	94.7103	95.2455
9.76	2020-07-17 06:40:00	1.4633	94.6211	94.7995
9.74	2020-07-17 06:45:00	1.77447	94.7995	94.9779
9.75	2020-07-17 06:50:00	2.36237	94.7995	95.1563
9.77	2020-07-17 06:55:00	3.282	94.8887	95.2455
9.8	2020-07-17 07:00:00	4.53195	94.9779	95.2455
9.81	2020-07-17 07:05:00	6.14467	94.8887	95.1563
9.91	2020-07-17 07:10:00	7.91912	94.9779	95.3347
9.95	2020-07-17 07:15:00	9.87988	94.8887	95.1563
9.97	2020-07-17 07:20:00	11.8816	94.7103	94.8887
10.02	2020-07-17 07:25:00	13.9337	94.7103	94.9779
10.1	2020-07-17 07:30:00	16.0542	94.7995	95.0671
10.17	2020-07-17 07:35:00	18.0634	94.7995	94.9779
10.34	2020-07-17 07:40:00	22.7935	94.9779	95.4239
11.24	2020-07-17 07:45:00	109.678	93.0153	95.6023
12.8	2020-07-17 07:50:00	148.859	86.7709	92.6585
13.65	2020-07-17 07:55:00	168.34	85.7004	86.8601
14.24	2020-07-17 08:00:00	190.372	83.7379	86.2357
14.93	2020-07-17 08:05:00	224.478	82.8458	85.076
15.64	2020-07-17 08:10:00	275.269	79.2776	82.4801
16.16	2020-07-17 08:15:00	305.66	78.4747	79.2954
16.6	2020-07-17 08:20:00	321.569	78.0465	78.9118
17.12	2020-07-17 08:25:00	324.849	77.0385	78.6085
17.51	2020-07-17 08:30:00	295.294	77.4845	78.5907
17.88	2020-07-17 08:35:00	271.111	76.7798	78.2695
18.17	2020-07-17 08:40:00	256.915	76.4854	77.199
18.44	2020-07-17 08:45:00	247.749	76.3962	77.9841
18.9	2020-07-17 08:50:00	246.045	74.1393	77.877
19.25	2020-07-17 08:55:00	232.736	74.2374	77.4756
19.55	2020-07-17 09:00:00	211.776	74.5585	75.4506
20	2020-07-17 09:05:00	216.777	71.7307	76.1732
20.57	2020-07-17 09:10:00	220.908	65.7895	72.5068
21.19	2020-07-17 09:15:00	230.807	63.1044	71.4809
21.78	2020-07-17 09:20:00	277.231	60.9635	67.3863
22.03	2020-07-17 09:25:00	311.295	55.843	62.3373
22.47	2020-07-17 09:30:00	349.472	51.909	55.5754
22.71	2020-07-17 09:35:00	912.696	48.2159	53.5593
22.84	2020-07-17 09:40:00	1043.52	49.4202	51.579
23.1	2020-07-17 09:45:00	1091.17	47.8769	51.0348
23.42	2020-07-17 09:50:00	1143.31	46.6012	49.0812
23.71	2020-07-17 09:55:00	1195.52	45.5664	47.9126
23.92	2020-07-17 10:00:00	1247.57	45.5575	47.3238
24.31	2020-07-17 10:05:00	1288.75	45.0936	47.7163
24.68	2020-07-17 10:10:00	1331.28	43.7912	46.0482
25.13	2020-07-17 10:15:00	1375.22	43.7823	45.388
25.63	2020-07-17 10:20:00	1417.73	42.6583	44.9242
26.04	2020-07-17 10:25:00	1455.64	42.5067	44.6833
26.15	2020-07-17 10:30:00	1482.47	42.4531	43.1846
26.01	2020-07-17 10:35:00	1512.87	42.5423	44.4335
26.24	2020-07-17 10:40:00	1534.51	42.5513	44.8082
26.47	2020-07-17 10:45:00	1553.31	43.1936	44.719
26.68	2020-07-17 10:50:00	1578.74	44.041	45.611
26.85	2020-07-17 10:55:00	1601.33	43.5415	45.611
26.89	2020-07-17 11:00:00	1624.24	43.4166	45.1204
26.69	2020-07-17 11:05:00	1644.14	44.7011	45.9679
26.66	2020-07-17 11:10:00	1660.91	45.1561	46.4228
26.69	2020-07-17 11:15:00	1681.26	45.2096	46.9581
26.98	2020-07-17 11:20:00	1698.41	44.7279	46.3247
27.21	2020-07-17 11:25:00	1719.21	44.9242	46.1641
27.25	2020-07-17 11:30:00	1733.23	44.273	46.2355
27.12	2020-07-17 11:35:00	1743.81	44.1659	45.6735
27.3	2020-07-17 11:40:00	1754.46	44.1837	45.7805
27.42	2020-07-17 11:45:00	1765.18	44.5584	45.8341
27.72	2020-07-17 11:50:00	1775.96	44.7547	45.9054
27.89	2020-07-17 11:55:00	1783.18	43.7734	45.6913
27.95	2020-07-17 12:00:00	1794.07	43.5058	45.3345
27.89	2020-07-17 12:05:00	1805.03	44.1035	45.0669
27.95	2020-07-17 12:10:00	1786.81	43.7556	45.1472
27.83	2020-07-17 12:15:00	1432.19	45.2007	46.9402
28.11	2020-07-17 12:20:00	1827.14	46.3425	48.3051
28.14	2020-07-17 12:25:00	1827.14	46.7707	48.2337
28.23	2020-07-17 12:30:00	1830.86	46.7975	47.3506
28.29	2020-07-17 12:35:00	1834.58	46.8421	48.3318
28.37	2020-07-17 12:40:00	1838.3	46.0749	47.1543
28.41	2020-07-17 12:45:00	1842.04	46.0838	47.0205
28.26	2020-07-17 12:50:00	1842.04	46.744	49.3934
28.22	2020-07-17 12:55:00	1849.53	47.0205	48.3943
28.39	2020-07-17 13:00:00	1853.29	46.3961	48.4746
28.46	2020-07-17 13:05:00	1853.29	46.2355	47.0294
28.48	2020-07-17 13:10:00	1853.29	46.3693	47.2435
28.46	2020-07-17 13:15:00	1857.05	46.2266	47.0205
28.39	2020-07-17 13:20:00	1853.29	46.1552	47.8323
28.44	2020-07-17 13:25:00	1853.29	45.9946	47.6093
28.53	2020-07-17 13:30:00	1849.53	45.9143	46.9135
28.43	2020-07-17 13:35:00	1845.78	46.6726	48.1624
28.5	2020-07-17 13:40:00	1838.3	45.7627	47.6717
28.56	2020-07-17 13:45:00	1834.58	46.2979	47.3506
28.51	2020-07-17 13:50:00	1823.44	46.1017	47.1097
28.55	2020-07-17 13:55:00	1816.05	45.3702	46.9937
28.57	2020-07-17 14:00:00	1805.03	46.2533	47.7966
28.71	2020-07-17 14:05:00	1794.07	45.8519	46.7707
28.76	2020-07-17 14:10:00	1783.18	45.5664	47.1186
28.75	2020-07-17 14:15:00	1765.18	45.8251	46.7886
28.72	2020-07-17 14:20:00	1743.81	45.2988	46.5923
28.72	2020-07-17 14:25:00	1722.71	45.9054	47.074
28.73	2020-07-17 14:30:00	1688.1	45.4862	46.9045
28.68	2020-07-17 14:35:00	1657.54	45.4594	46.8778
28.65	2020-07-17 14:40:00	1614.38	46.512	46.967
28.54	2020-07-17 14:45:00	1569.16	46.6369	47.6182
28.51	2020-07-17 14:50:00	1519.02	46.5566	47.868
28.54	2020-07-17 14:55:00	1458.6	46.6191	48.3764
28.49	2020-07-17 15:00:00	1406.27	46.4496	47.5647
28.39	2020-07-17 15:05:00	1350.33	45.8876	47.413
28.39	2020-07-17 15:10:00	1299.25	45.95	46.8064
28.26	2020-07-17 15:15:00	1237.48	46.1552	47.3773
28.12	2020-07-17 15:20:00	1183.45	46.2087	47.1989
27.86	2020-07-17 15:25:00	1134.07	47.3773	49.1079
27.81	2020-07-17 15:30:00	1104.54	48.1713	49.5807
27.34	2020-07-17 15:35:00	1056.3	48.5281	50.6601
26.96	2020-07-17 15:40:00	1016.35	50.0268	51.7217
26.84	2020-07-17 15:45:00	979.887	51.347	52.3907
26.83	2020-07-17 15:50:00	942.82	50.7939	51.7395
26.58	2020-07-17 15:55:00	907.156	50.3479	51.5165
26.47	2020-07-17 16:00:00	862.276	50.4014	52.9438
26.61	2020-07-17 16:05:00	817.955	51.3559	52.8903
26.7	2020-07-17 16:10:00	237.123	50.6244	51.5522
26.67	2020-07-17 16:15:00	142.705	51.1864	52.0428
26.7	2020-07-17 16:20:00	157.307	50.9634	51.6146
26.64	2020-07-17 16:25:00	186.018	50.2855	51.5344
26.46	2020-07-17 16:30:00	252.162	50.4639	51.2667
26.35	2020-07-17 16:35:00	266.582	51.2935	52.3907
26.28	2020-07-17 16:40:00	239.638	52.1945	52.9349
26.08	2020-07-17 16:45:00	155.183	52.2391	53.8983
24.78	2020-07-17 16:50:00	30.9109	54.1213	59.5986
23.56	2020-07-17 16:55:00	26.6057	59.7235	61.9804
22.92	2020-07-17 17:00:00	26.6003	61.9358	63.943
22.56	2020-07-17 17:05:00	38.1828	63.0598	64.1214
22.4	2020-07-17 17:10:00	49.6909	63.1847	64.0411
22.4	2020-07-17 17:15:00	44.0832	64.0411	64.6299
22.35	2020-07-17 17:20:00	34.5613	64.5139	65.5576
22.23	2020-07-17 17:25:00	23.6607	65.2811	66.3069
22.07	2020-07-17 17:30:00	17.9793	66.4051	67.5469
21.92	2020-07-17 17:35:00	13.3713	67.5737	68.6977
21.8	2020-07-17 17:40:00	9.09104	68.6798	69.5897
21.48	2020-07-17 17:45:00	6.69142	69.67	72.6228
20.89	2020-07-17 17:50:00	4.62487	72.7387	75.1473
20.33	2020-07-17 17:55:00	3.15785	75.2722	76.8422
19.97	2020-07-17 18:00:00	2.20038	76.869	78.4925
19.64	2020-07-17 18:05:00	1.6163	78.555	80.2945
19.25	2020-07-17 18:10:00	1.3008	80.3659	82.0608
18.98	2020-07-17 18:15:00	1.16105	82.1054	83.3275
18.87	2020-07-17 18:20:00	1.1081	83.3721	84.0412
18.77	2020-07-17 18:25:00	1.09468	83.9787	84.9868
18.64	2020-07-17 18:30:00	1.09468	84.9868	85.4328
18.55	2020-07-17 18:35:00	1.09691	85.1652	85.968
18.4	2020-07-17 18:40:00	1.09914	85.4328	86.2357
18.22	2020-07-17 18:45:00	1.10361	86.2357	87.1277
18.11	2020-07-17 18:50:00	1.10585	87.1277	87.9306
18	2020-07-17 18:55:00	1.1081	87.5737	87.9306
17.8	2020-07-17 19:00:00	1.1126	87.8414	88.4658
17.62	2020-07-17 19:05:00	1.11713	88.4658	89.2687
17.47	2020-07-17 19:10:00	1.1194	89.0903	89.7147
17.33	2020-07-17 19:15:00	1.12167	89.6255	90.1607
17.19	2020-07-17 19:20:00	1.12395	89.6255	90.1607
17.03	2020-07-17 19:25:00	1.12852	89.7147	90.4284
16.88	2020-07-17 19:30:00	1.13082	90.2499	90.8744
16.75	2020-07-17 19:35:00	1.13311	90.6068	91.0528
16.63	2020-07-17 19:40:00	1.13541	90.6068	91.2312
16.54	2020-07-17 19:45:00	1.14003	91.2312	91.6772
16.43	2020-07-17 19:50:00	1.14003	91.2312	91.4988
16.31	2020-07-17 19:55:00	1.14235	91.4988	91.7665
16.18	2020-07-17 20:00:00	1.14467	91.142	91.9449
16.06	2020-07-17 20:05:00	1.147	91.7665	92.3017
16.06	2020-07-17 20:10:00	1.14933	92.3909	93.0153
16.05	2020-07-17 20:15:00	1.14933	92.4801	92.8369
15.98	2020-07-17 20:20:00	1.15166	92.3017	92.5693
15.89	2020-07-17 20:25:00	1.15166	92.3909	92.6585
15.8	2020-07-17 20:30:00	1.154	92.3909	92.8369
15.74	2020-07-17 20:35:00	1.15634	92.4801	92.9261
15.67	2020-07-17 20:40:00	1.15869	92.5693	93.1045
15.63	2020-07-17 20:45:00	1.15869	92.7477	93.1938
15.56	2020-07-17 20:50:00	1.15869	92.7477	93.0153
15.47	2020-07-17 20:55:00	1.16105	92.6585	92.9261
15.4	2020-07-17 21:00:00	1.16341	92.8369	93.1045
15.34	2020-07-17 21:05:00	1.16341	92.8369	93.1045
15.25	2020-07-17 21:10:00	1.16341	92.7477	93.1045
15.18	2020-07-17 21:15:00	1.16577	92.6585	93.283
15.1	2020-07-17 21:20:00	1.16814	92.6585	93.1045
15	2020-07-17 21:25:00	1.17051	92.6585	93.1938
14.94	2020-07-17 21:30:00	1.16814	93.1045	93.3722
14.89	2020-07-17 21:35:00	1.17051	93.1045	93.4614
14.82	2020-07-17 21:40:00	1.17289	93.0153	93.283
14.75	2020-07-17 21:45:00	1.17527	93.0153	93.3722
14.7	2020-07-17 21:50:00	1.17527	93.283	93.4614
14.63	2020-07-17 21:55:00	1.17527	93.1045	93.283
14.55	2020-07-17 22:00:00	1.17766	93.1045	93.283
14.51	2020-07-17 22:05:00	1.17766	93.283	93.6398
14.47	2020-07-17 22:10:00	1.18005	93.283	93.4614
14.43	2020-07-17 22:15:00	1.18005	93.3722	93.4614
14.37	2020-07-17 22:20:00	1.18245	93.283	93.4614
14.29	2020-07-17 22:25:00	1.18245	93.1938	93.5506
14.25	2020-07-17 22:30:00	1.18245	93.5506	93.6398
14.19	2020-07-17 22:35:00	1.18485	93.283	93.6398
14.12	2020-07-17 22:40:00	1.18245	93.283	93.729
14.04	2020-07-17 22:45:00	1.18485	93.283	93.8182
14	2020-07-17 22:50:00	1.18726	93.4614	93.8182
13.98	2020-07-17 22:55:00	1.18726	93.729	93.9966
13.9	2020-07-17 23:00:00	1.18726	93.283	93.9966
13.87	2020-07-17 23:05:00	1.18967	93.729	93.9966
13.87	2020-07-17 23:10:00	1.18967	93.9966	94.3534
13.87	2020-07-17 23:15:00	1.18967	93.9966	94.3534
13.86	2020-07-17 23:20:00	1.19209	93.9074	94.3534
13.86	2020-07-17 23:25:00	1.18967	94.0858	94.5319
13.87	2020-07-17 23:30:00	1.19209	93.8182	94.5319
13.79	2020-07-17 23:35:00	1.19209	93.8182	94.175
13.77	2020-07-17 23:40:00	1.19209	94.0858	94.2642
13.73	2020-07-17 23:45:00	1.19209	94.0858	94.2642
13.71	2020-07-17 23:50:00	1.19451	93.9074	94.4426
13.64	2020-07-17 23:55:00	1.19451	93.9074	94.2642
13.62	2020-07-18	1.19451	94.0858	94.4426
13.64	2020-07-18 00:05:00	1.19694	94.3534	94.6211
13.59	2020-07-18 00:10:00	1.19451	94.175	94.4426
13.57	2020-07-18 00:15:00	1.19694	94.2642	94.7103
13.57	2020-07-18 00:20:00	1.19694	94.6211	94.7995
13.58	2020-07-18 00:25:00	1.19694	94.6211	94.7995
13.57	2020-07-18 00:30:00	1.19694	94.6211	94.7103
13.58	2020-07-18 00:35:00	1.19694	94.6211	94.8887
13.57	2020-07-18 00:40:00	1.19694	94.5319	94.9779
13.52	2020-07-18 00:45:00	1.19937	94.2642	94.7103
13.47	2020-07-18 00:50:00	1.19694	94.3534	94.7995
13.46	2020-07-18 00:55:00	1.19694	94.6211	94.7995
13.39	2020-07-18 01:00:00	1.19937	94.3534	94.6211
13.38	2020-07-18 01:05:00	1.19937	94.5319	94.7995
13.36	2020-07-18 01:10:00	1.19937	94.6211	94.9779
13.37	2020-07-18 01:15:00	1.19937	94.7103	94.9779
13.34	2020-07-18 01:20:00	1.20181	94.7103	94.9779
13.33	2020-07-18 01:25:00	1.20181	94.7995	94.9779
13.31	2020-07-18 01:30:00	1.20181	94.7103	94.8887
13.34	2020-07-18 01:35:00	1.20181	94.7995	95.1563
13.33	2020-07-18 01:40:00	1.19937	94.7995	95.0671
13.27	2020-07-18 01:45:00	1.20181	94.6211	94.8887
13.21	2020-07-18 01:50:00	1.20425	94.5319	94.7995
13.21	2020-07-18 01:55:00	1.20181	94.7103	95.0671
13.15	2020-07-18 02:00:00	1.20425	94.6211	94.8887
13.12	2020-07-18 02:05:00	1.20425	94.5319	94.9779
13.04	2020-07-18 02:10:00	1.20425	94.5319	94.8887
13.03	2020-07-18 02:15:00	1.20669	94.7995	95.0671
13.04	2020-07-18 02:20:00	1.20669	94.7995	95.1563
12.99	2020-07-18 02:25:00	1.20669	94.7995	94.9779
13.02	2020-07-18 02:30:00	1.20669	94.9779	95.2455
12.99	2020-07-18 02:35:00	1.20669	94.8887	95.2455
12.93	2020-07-18 02:40:00	1.20669	94.7995	95.0671
12.96	2020-07-18 02:45:00	1.20669	95.0671	95.3347
12.99	2020-07-18 02:50:00	1.20915	95.2455	95.4239
13.07	2020-07-18 02:55:00	1.20669	95.4239	95.5131
13.07	2020-07-18 03:00:00	1.20669	95.1563	95.4239
13.04	2020-07-18 03:05:00	1.20669	95.0671	95.2455
13.02	2020-07-18 03:10:00	1.20669	95.0671	95.3347
12.96	2020-07-18 03:15:00	1.20669	94.7995	95.1563
12.87	2020-07-18 03:20:00	1.20915	94.7103	94.8887
12.84	2020-07-18 03:25:00	1.20915	94.7995	95.1563
12.81	2020-07-18 03:30:00	1.20915	94.8887	95.0671
12.73	2020-07-18 03:35:00	1.2116	94.7995	94.9779
12.69	2020-07-18 03:40:00	1.2116	94.8887	95.0671
12.63	2020-07-18 03:45:00	1.21406	94.8887	95.2455
12.63	2020-07-18 03:50:00	1.2116	95.1563	95.2455
12.62	2020-07-18 03:55:00	1.21406	95.1563	95.5131
12.66	2020-07-18 04:00:00	1.21406	95.4239	95.6023
12.66	2020-07-18 04:05:00	1.2116	95.1563	95.6023
12.59	2020-07-18 04:10:00	1.21406	95.0671	95.4239
12.56	2020-07-18 04:15:00	1.21406	95.1563	95.3347
12.49	2020-07-18 04:20:00	1.21653	95.0671	95.2455
12.47	2020-07-18 04:25:00	1.21653	95.1563	95.4239
12.41	2020-07-18 04:30:00	1.21653	95.1563	95.2455
12.37	2020-07-18 04:35:00	1.21653	95.1563	95.2455
12.35	2020-07-18 04:40:00	1.21653	95.2455	95.3347
12.32	2020-07-18 04:45:00	1.219	95.1563	95.3347
12.32	2020-07-18 04:50:00	1.219	95.2455	95.5131
12.31	2020-07-18 04:55:00	1.219	95.2455	95.6023
12.35	2020-07-18 05:00:00	1.219	95.4239	95.6915
12.25	2020-07-18 05:05:00	1.219	95.1563	95.4239
12.29	2020-07-18 05:10:00	1.219	95.3347	95.6915
12.28	2020-07-18 05:15:00	1.219	95.4239	95.6023
12.29	2020-07-18 05:20:00	1.219	95.5131	95.6023
12.29	2020-07-18 05:25:00	1.219	95.4239	95.7807
12.25	2020-07-18 05:30:00	1.22148	95.2455	95.6023
12.19	2020-07-18 05:35:00	1.22148	95.1563	95.6023
12.23	2020-07-18 05:40:00	1.219	95.5131	95.7807
12.21	2020-07-18 05:45:00	1.219	95.4239	95.6023
12.2	2020-07-18 05:50:00	1.22148	95.4239	95.6023
12.23	2020-07-18 05:55:00	1.219	95.6023	95.7807
12.25	2020-07-18 06:00:00	1.219	95.6023	95.6915
12.27	2020-07-18 06:05:00	1.21653	95.6023	95.7807
12.31	2020-07-18 06:10:00	1.21653	95.6915	95.7807
12.28	2020-07-18 06:15:00	1.21406	95.4239	95.6915
12.27	2020-07-18 06:20:00	1.21406	95.4239	95.8699
12.35	2020-07-18 06:25:00	1.21653	95.6915	95.9592
12.33	2020-07-18 06:30:00	1.22396	95.4239	95.8699
12.24	2020-07-18 06:35:00	1.2695	95.2455	95.4239
12.24	2020-07-18 06:40:00	1.39656	95.4239	95.5131
12.17	2020-07-18 06:45:00	1.66626	95.1563	95.5131
12.19	2020-07-18 06:50:00	2.09152	95.4239	95.6915
12.27	2020-07-18 06:55:00	2.88222	95.6915	95.7807
12.29	2020-07-18 07:00:00	4.07804	95.4239	95.7807
12.29	2020-07-18 07:05:00	5.76998	95.4239	95.5131
12.4	2020-07-18 07:10:00	7.82327	95.5131	95.7807
12.63	2020-07-18 07:15:00	10.2267	95.6915	96.1376
12.76	2020-07-18 07:20:00	12.7537	95.4239	95.9592
12.84	2020-07-18 07:25:00	15.6044	95.2455	95.5131
12.96	2020-07-18 07:30:00	18.4712	95.2455	95.4239
13.07	2020-07-18 07:35:00	21.4645	95.0671	95.3347
13.18	2020-07-18 07:40:00	28.7621	94.8887	94.9779
13.99	2020-07-18 07:45:00	110.729	91.7665	95.0671
15.19	2020-07-18 07:50:00	147.416	87.8414	91.4988
15.84	2020-07-18 07:55:00	186.282	84.8976	87.7522
16.25	2020-07-18 08:00:00	229.872	84.2731	86.3249
16.69	2020-07-18 08:05:00	269.465	83.0331	85.2544
17.34	2020-07-18 08:10:00	296.495	81.0974	83.0064
17.91	2020-07-18 08:15:00	316.39	80.4462	82.935
18.49	2020-07-18 08:20:00	329.497	78.5282	80.3213
18.77	2020-07-18 08:25:00	336.936	78.7512	80.7049
19.1	2020-07-18 08:30:00	313.196	78.1268	79.7057
19.48	2020-07-18 08:35:00	277.288	77.4131	79.2954
19.9	2020-07-18 08:40:00	263.783	76.6549	78.9118
20.2	2020-07-18 08:45:00	250.022	76.0037	78.2784
20.46	2020-07-18 08:50:00	236.21	72.7922	77.0831
20.92	2020-07-18 08:55:00	223.206	74.1393	75.5398
21.32	2020-07-18 09:00:00	210.448	71.7931	75.3971
21.74	2020-07-18 09:05:00	204.719	69.1259	74.2017
22.21	2020-07-18 09:10:00	200.402	64.5317	71.7307
22.74	2020-07-18 09:15:00	239.104	60.2944	64.4068
23.35	2020-07-18 09:20:00	218.411	58.9831	60.9992
23.74	2020-07-18 09:25:00	368.409	56.1017	60.1963
23.72	2020-07-18 09:30:00	864.028	56.7618	58.9028
23.85	2020-07-18 09:35:00	1008.13	55.397	56.9938
24.02	2020-07-18 09:40:00	1056.3	54.8082	56.3337
24.29	2020-07-18 09:45:00	1138.68	53.6039	55.6378
24.47	2020-07-18 09:50:00	1169.12	52.5781	55.4951
24.6	2020-07-18 09:55:00	1222.51	53.7288	55.2543
24.82	2020-07-18 10:00:00	1270.57	52.1499	53.8983
25.05	2020-07-18 10:05:00	1331.28	51.9447	53.4434
25.41	2020-07-18 10:10:00	1380.82	50.6423	52.6405
25.62	2020-07-18 10:15:00	1426.39	49.9376	51.4362
25.83	2020-07-18 10:20:00	1464.53	48.8403	52.0785
26.14	2020-07-18 10:25:00	1500.63	48.0553	50.6244
26.45	2020-07-18 10:30:00	1522.11	48.2337	49.7859
26.64	2020-07-18 10:35:00	1543.88	48.0821	49.438
26.53	2020-07-18 10:40:00	1569.16	47.8412	49.099
26.7	2020-07-18 10:45:00	1594.84	48.1177	50.0446
26.86	2020-07-18 10:50:00	1614.38	46.8243	49.4915
26.82	2020-07-18 10:55:00	1634.16	47.3952	49.1079
26.92	2020-07-18 11:00:00	1654.18	47.3952	49.099
26.8	2020-07-18 11:05:00	1664.28	47.413	48.769
26.99	2020-07-18 11:10:00	1691.53	47.6093	48.9563
27.22	2020-07-18 11:15:00	1423.5	47.3863	48.2605
26.91	2020-07-18 11:20:00	1519.02	47.6182	48.4121
27.44	2020-07-18 11:25:00	1758.03	46.2533	48.5549
27.02	2020-07-18 11:30:00	874.614	46.405	49.7681
26.81	2020-07-18 11:35:00	1688.1	48.3497	49.9197
26.85	2020-07-18 11:40:00	867.542	47.9393	50.116
26.78	2020-07-18 11:45:00	1775.96	46.851	50.562
27.57	2020-07-18 11:50:00	1797.72	46.1998	48.3051
28.11	2020-07-18 11:55:00	1808.7	45.4059	47.0562
28.51	2020-07-18 12:00:00	1812.37	43.7377	45.9322
28.54	2020-07-18 12:05:00	1674.45	43.6396	45.4683
28.26	2020-07-18 12:10:00	1801.37	43.6039	45.8697
28.11	2020-07-18 12:15:00	1736.75	44.2283	46.6548
28.13	2020-07-18 12:20:00	1805.03	45.7538	47.8234
28.28	2020-07-18 12:25:00	1849.53	45.2096	46.182
28.45	2020-07-18 12:30:00	1849.53	44.719	46.066
28.49	2020-07-18 12:35:00	1849.53	44.8974	46.5834
28.42	2020-07-18 12:40:00	1853.29	45.2096	46.8956
28.28	2020-07-18 12:45:00	1857.05	45.1561	47.1454
28.3	2020-07-18 12:50:00	1853.29	45.9857	47.3149
28.34	2020-07-18 12:55:00	1845.78	45.1115	46.9045
28.35	2020-07-18 13:00:00	1864.61	44.8082	46.0392
28.11	2020-07-18 13:05:00	1647.48	45.6021	46.7886
28.08	2020-07-18 13:10:00	1853.29	44.942	46.6815
28.14	2020-07-18 13:15:00	1849.53	45.165	46.2979
28.11	2020-07-18 13:20:00	1849.53	45.4862	46.8421
28.19	2020-07-18 13:25:00	1819.74	45.2631	46.5299
28.19	2020-07-18 13:30:00	1842.04	45.3523	46.8243
28.32	2020-07-18 13:35:00	1857.05	45.0669	46.2266
28.4	2020-07-18 13:40:00	1479.47	44.7368	46.4585
27.87	2020-07-18 13:45:00	1372.44	44.9331	46.6102
27.48	2020-07-18 13:50:00	1232.47	45.1026	48.4924
27.29	2020-07-18 13:55:00	1222.51	47.1632	48.9295
27.05	2020-07-18 14:00:00	1309.84	47.1454	49.3577
27.11	2020-07-18 14:05:00	1312.5	47.1722	48.7333
27.65	2020-07-18 14:10:00	1611.11	46.0928	47.6093
27.85	2020-07-18 14:15:00	1178.65	45.8073	47.5825
27.38	2020-07-18 14:20:00	1020.48	46.851	49.0009
26.96	2020-07-18 14:25:00	1232.47	47.3773	49.8662
26.95	2020-07-18 14:30:00	1056.3	47.6896	49.5183
27.18	2020-07-18 14:35:00	1147.96	47.868	48.8136
27.25	2020-07-18 14:40:00	1509.8	46.9581	49.4202
27.75	2020-07-18 14:45:00	1540.75	45.6735	47.4219
27.94	2020-07-18 14:50:00	1607.84	45.95	47.1632
27.7	2020-07-18 14:55:00	914.55	46.0303	48.207
27.43	2020-07-18 15:00:00	1328.59	46.0571	47.9126
27.78	2020-07-18 15:05:00	1301.89	46.3604	47.6985
27.74	2020-07-18 15:10:00	1301.89	46.2444	47.5825
27.71	2020-07-18 15:15:00	1195.52	45.9679	47.2792
27.59	2020-07-18 15:20:00	977.9	46.2979	47.3952
27.1	2020-07-18 15:25:00	1028.8	47.1632	49.0901
27.2	2020-07-18 15:30:00	960.2	47.2792	49.4112
26.73	2020-07-18 15:35:00	987.874	48.0464	50.5085
26.59	2020-07-18 15:40:00	914.55	50.2319	51.5254
26.37	2020-07-18 15:45:00	890.736	50.3657	51.2489
26.16	2020-07-18 15:50:00	876.39	50.6155	51.7574
26.04	2020-07-18 15:55:00	829.658	51.017	52.7208
26.02	2020-07-18 16:00:00	758.781	51.6325	52.4532
26.02	2020-07-18 16:05:00	745.047	51.2667	52.8011
26.1	2020-07-18 16:10:00	364.689	50.6334	52.6316
25.42	2020-07-18 16:15:00	220.818	52.7832	55.4594
25.53	2020-07-18 16:20:00	278.02	53.2471	55.0758
25.62	2020-07-18 16:25:00	246.195	53.5237	54.7012
25.14	2020-07-18 16:30:00	171.235	54.6209	57.1098
24.88	2020-07-18 16:35:00	337.62	55.1026	57.2346
25.26	2020-07-18 16:40:00	284.124	54.5228	55.3792
25.17	2020-07-18 16:45:00	193.842	55.0045	56.3069
24.39	2020-07-18 16:50:00	107.518	56.3069	59.7503
23.59	2020-07-18 16:55:00	98.1735	59.8662	62.1232
23.16	2020-07-18 17:00:00	59.1669	61.9893	63.5415
22.89	2020-07-18 17:05:00	53.9807	63.4166	64.0143
22.68	2020-07-18 17:10:00	34.3376	63.9519	64.505
22.45	2020-07-18 17:15:00	22.9606	64.5674	65.4595
22.26	2020-07-18 17:20:00	17.5752	65.4595	66.2356
22.07	2020-07-18 17:25:00	14.6321	65.9947	66.521
21.89	2020-07-18 17:30:00	13.0204	66.2177	67.8234
21.75	2020-07-18 17:35:00	9.50615	67.2347	69.1437
21.59	2020-07-18 17:40:00	8.03242	68.4479	70.2142
21.45	2020-07-18 17:45:00	6.81477	69.5005	70.6513
21.22	2020-07-18 17:50:00	4.71969	69.9644	73.2294
20.87	2020-07-18 17:55:00	3.20304	72.257	74.2731
20.52	2020-07-18 18:00:00	2.16934	74.2285	76.1821
20.12	2020-07-18 18:05:00	1.61958	76.307	77.5826
19.72	2020-07-18 18:10:00	1.31407	77.6986	79.8039
19.44	2020-07-18 18:15:00	1.15869	79.7949	80.9368
19.2	2020-07-18 18:20:00	1.10137	80.8565	82.0697
18.94	2020-07-18 18:25:00	1.08804	82.0519	83.381
18.7	2020-07-18 18:30:00	1.08804	83.3721	84.5407
18.5	2020-07-18 18:35:00	1.09246	84.5407	85.2544
18.32	2020-07-18 18:40:00	1.09691	85.2544	86.0572
18.16	2020-07-18 18:45:00	1.09914	86.0572	86.4141
17.97	2020-07-18 18:50:00	1.10585	86.0572	86.5925
17.71	2020-07-18 18:55:00	1.1126	86.4141	87.3953
17.47	2020-07-18 19:00:00	1.11713	87.4845	87.7522
17.25	2020-07-18 19:05:00	1.1194	87.8414	88.3766
17.01	2020-07-18 19:10:00	1.12395	88.3766	89.0903
16.85	2020-07-18 19:15:00	1.12623	89.0011	89.7147
16.73	2020-07-18 19:20:00	1.13082	89.1795	90.0715
16.59	2020-07-18 19:25:00	1.13311	89.0903	90.5176
16.49	2020-07-18 19:30:00	1.13541	89.8039	90.6068
16.4	2020-07-18 19:35:00	1.13772	89.9823	90.696
16.28	2020-07-18 19:40:00	1.14003	89.9823	90.5176
16.16	2020-07-18 19:45:00	1.14235	90.6068	91.142
16.07	2020-07-18 19:50:00	1.14467	90.9636	91.142
15.94	2020-07-18 19:55:00	1.147	90.6068	91.3204
15.83	2020-07-18 20:00:00	1.14933	91.0528	91.4988
15.72	2020-07-18 20:05:00	1.15166	91.3204	91.6772
15.62	2020-07-18 20:10:00	1.154	91.4988	92.1233
15.56	2020-07-18 20:15:00	1.154	91.7665	92.3017
15.48	2020-07-18 20:20:00	1.15634	91.7665	92.2125
15.37	2020-07-18 20:25:00	1.15869	91.4988	92.5693
15.3	2020-07-18 20:30:00	1.15869	91.9449	92.5693
15.27	2020-07-18 20:35:00	1.16105	92.2125	92.8369
15.24	2020-07-18 20:40:00	1.16341	92.4801	92.6585
15.18	2020-07-18 20:45:00	1.16341	92.3017	92.7477
15.15	2020-07-18 20:50:00	1.16341	92.5693	92.9261
15.09	2020-07-18 20:55:00	1.16577	92.4801	92.8369
15.06	2020-07-18 21:00:00	1.16577	92.7477	92.8369
14.99	2020-07-18 21:05:00	1.16814	92.5693	92.8369
14.94	2020-07-18 21:10:00	1.16814	92.8369	93.1938
14.92	2020-07-18 21:15:00	1.17051	92.7477	93.283
14.88	2020-07-18 21:20:00	1.16814	92.7477	93.1938
14.84	2020-07-18 21:25:00	1.17051	92.6585	93.1938
14.73	2020-07-18 21:30:00	1.17289	92.2125	92.8369
14.65	2020-07-18 21:35:00	1.17289	92.7477	93.1938
14.65	2020-07-18 21:40:00	1.17289	93.283	93.5506
14.64	2020-07-18 21:45:00	1.17289	93.3722	93.6398
14.64	2020-07-18 21:50:00	1.17527	93.4614	93.6398
14.63	2020-07-18 21:55:00	1.17527	93.4614	93.729
14.58	2020-07-18 22:00:00	1.17527	93.1045	93.5506
14.54	2020-07-18 22:05:00	1.17527	93.3722	93.729
14.52	2020-07-18 22:10:00	1.17766	93.729	93.729
14.5	2020-07-18 22:15:00	1.17766	93.6398	93.9074
14.5	2020-07-18 22:20:00	1.17766	93.8182	94.3534
14.52	2020-07-18 22:25:00	1.17766	93.6398	94.2642
14.46	2020-07-18 22:30:00	1.17766	93.4614	93.8182
14.4	2020-07-18 22:35:00	1.18005	93.5506	93.8182
14.36	2020-07-18 22:40:00	1.18005	93.6398	93.8182
14.29	2020-07-18 22:45:00	1.18005	93.5506	93.9966
14.29	2020-07-18 22:50:00	1.18005	93.9966	94.0858
14.22	2020-07-18 22:55:00	1.18245	93.6398	93.9966
14.2	2020-07-18 23:00:00	1.18245	93.8182	94.175
14.19	2020-07-18 23:05:00	1.18245	93.9966	94.175
14.15	2020-07-18 23:10:00	1.18245	93.9074	94.175
14.13	2020-07-18 23:15:00	1.18245	93.8182	94.175
14.08	2020-07-18 23:20:00	1.18485	93.9074	94.0858
14.07	2020-07-18 23:25:00	1.18485	93.9966	94.175
14.04	2020-07-18 23:30:00	1.18726	93.9074	94.175
14.03	2020-07-18 23:35:00	1.18485	94.0858	94.3534
14.04	2020-07-18 23:40:00	1.18726	94.0858	94.3534
14.01	2020-07-18 23:45:00	1.18485	94.0858	94.3534
14.05	2020-07-18 23:50:00	1.18485	94.3534	94.5319
14.15	2020-07-18 23:55:00	1.18485	94.4426	94.7103
14.31	2020-07-19	1.18005	94.7103	94.8887
14.48	2020-07-19 00:05:00	1.18005	94.7995	94.8887
14.61	2020-07-19 00:10:00	1.17766	94.6211	94.7995
14.67	2020-07-19 00:15:00	1.17766	94.2642	94.6211
14.67	2020-07-19 00:20:00	1.17527	93.9966	94.3534
14.63	2020-07-19 00:25:00	1.17527	93.9966	94.0858
14.63	2020-07-19 00:30:00	1.17527	94.175	94.2642
14.63	2020-07-19 00:35:00	1.17527	94.2642	94.3534
14.6	2020-07-19 00:40:00	1.17527	93.8182	94.3534
14.5	2020-07-19 00:45:00	1.17527	93.729	93.9966
14.42	2020-07-19 00:50:00	1.17766	93.8182	94.175
14.39	2020-07-19 00:55:00	1.18005	94.175	94.4426
14.33	2020-07-19 01:00:00	1.18005	94.0858	94.4426
14.24	2020-07-19 01:05:00	1.18005	93.8182	94.175
14.15	2020-07-19 01:10:00	1.18245	93.9074	94.3534
14.1	2020-07-19 01:15:00	1.18485	94.0858	94.2642
14.02	2020-07-19 01:20:00	1.18726	93.9966	94.175
13.99	2020-07-19 01:25:00	1.18726	94.0858	94.3534
13.96	2020-07-19 01:30:00	1.18726	94.0858	94.3534
13.91	2020-07-19 01:35:00	1.18726	93.9966	94.175
13.88	2020-07-19 01:40:00	1.18967	93.9966	94.4426
13.85	2020-07-19 01:45:00	1.18967	93.9966	94.3534
13.79	2020-07-19 01:50:00	1.18967	93.9074	94.3534
13.74	2020-07-19 01:55:00	1.19209	94.175	94.2642
13.75	2020-07-19 02:00:00	1.19209	94.2642	94.6211
13.83	2020-07-19 02:05:00	1.18967	94.6211	94.9779
13.88	2020-07-19 02:10:00	1.18726	94.5319	94.7995
13.96	2020-07-19 02:15:00	1.18726	94.7103	94.8887
13.99	2020-07-19 02:20:00	1.18967	94.4426	94.8887
13.95	2020-07-19 02:25:00	1.18726	94.3534	94.5319
13.97	2020-07-19 02:30:00	1.18726	94.4426	94.7103
14.02	2020-07-19 02:35:00	1.18485	94.6211	94.7103
13.99	2020-07-19 02:40:00	1.18726	94.3534	94.6211
13.92	2020-07-19 02:45:00	1.18726	94.175	94.4426
13.83	2020-07-19 02:50:00	1.18726	94.175	94.5319
13.77	2020-07-19 02:55:00	1.18967	94.3534	94.6211
13.68	2020-07-19 03:00:00	1.19209	94.175	94.5319
13.61	2020-07-19 03:05:00	1.19209	94.2642	94.4426
13.58	2020-07-19 03:10:00	1.19209	94.3534	94.7995
13.65	2020-07-19 03:15:00	1.18967	94.7995	94.9779
13.74	2020-07-19 03:20:00	1.18967	94.8887	95.0671
13.81	2020-07-19 03:25:00	1.18967	94.8887	94.9779
13.88	2020-07-19 03:30:00	1.18726	94.8887	94.9779
13.89	2020-07-19 03:35:00	1.18726	94.6211	94.8887
13.85	2020-07-19 03:40:00	1.18726	94.6211	94.7103
13.81	2020-07-19 03:45:00	1.18726	94.6211	94.7103
13.72	2020-07-19 03:50:00	1.18967	94.5319	94.7103
13.62	2020-07-19 03:55:00	1.19209	94.5319	94.7103
13.48	2020-07-19 04:00:00	1.19451	94.0858	94.7103
13.35	2020-07-19 04:05:00	1.19451	94.3534	94.7995
13.25	2020-07-19 04:10:00	1.19694	94.3534	94.8887
13.13	2020-07-19 04:15:00	1.19937	94.4426	94.7995
13.07	2020-07-19 04:20:00	1.19937	94.7995	94.9779
13.02	2020-07-19 04:25:00	1.19937	94.7103	95.0671
13.01	2020-07-19 04:30:00	1.20181	94.9779	95.2455
13.01	2020-07-19 04:35:00	1.20425	95.1563	95.4239
13	2020-07-19 04:40:00	1.20425	94.8887	95.4239
12.85	2020-07-19 04:45:00	1.20425	94.3534	94.8887
12.75	2020-07-19 04:50:00	1.20669	94.5319	94.8887
12.73	2020-07-19 04:55:00	1.20669	94.8887	95.1563
12.7	2020-07-19 05:00:00	1.20915	94.8887	95.3347
12.7	2020-07-19 05:05:00	1.20915	95.0671	95.4239
12.67	2020-07-19 05:10:00	1.20915	95.1563	95.2455
12.62	2020-07-19 05:15:00	1.20915	95.0671	95.3347
12.54	2020-07-19 05:20:00	1.2116	94.7995	95.0671
12.5	2020-07-19 05:25:00	1.2116	94.9779	95.3347
12.5	2020-07-19 05:30:00	1.2116	95.0671	95.3347
12.47	2020-07-19 05:35:00	1.2116	95.1563	95.3347
12.45	2020-07-19 05:40:00	1.21406	95.1563	95.4239
12.44	2020-07-19 05:45:00	1.21406	95.1563	95.5131
12.39	2020-07-19 05:50:00	1.21406	95.1563	95.4239
12.41	2020-07-19 05:55:00	1.21406	95.4239	95.6023
12.42	2020-07-19 06:00:00	1.21406	95.4239	95.6915
12.38	2020-07-19 06:05:00	1.21406	95.1563	95.6023
12.41	2020-07-19 06:10:00	1.21406	95.4239	95.6915
12.4	2020-07-19 06:15:00	1.2116	95.4239	95.6915
12.38	2020-07-19 06:20:00	1.20915	95.3347	95.6915
12.36	2020-07-19 06:25:00	1.2116	95.3347	95.6915
12.34	2020-07-19 06:30:00	1.219	95.3347	95.6915
12.32	2020-07-19 06:35:00	1.24652	95.3347	95.6023
12.36	2020-07-19 06:40:00	1.34646	95.6023	95.8699
12.39	2020-07-19 06:45:00	1.61958	95.5131	95.8699
12.33	2020-07-19 06:50:00	2.17817	95.3347	95.5131
12.36	2020-07-19 06:55:00	3.2226	95.4239	95.6023
12.45	2020-07-19 07:00:00	4.70057	95.4239	95.7807
12.47	2020-07-19 07:05:00	6.55699	95.4239	95.6023
12.59	2020-07-19 07:10:00	8.71171	95.6023	95.7807
12.66	2020-07-19 07:15:00	10.9796	95.4239	95.6023
12.77	2020-07-19 07:20:00	13.3713	95.4239	95.6023
12.9	2020-07-19 07:25:00	16.6955	95.4239	95.6023
13.04	2020-07-19 07:30:00	24.2391	95.2455	95.4239
13.23	2020-07-19 07:35:00	31.5063	94.9779	95.2455
13.48	2020-07-19 07:40:00	43.8423	94.8887	95.1563
14.27	2020-07-19 07:45:00	119.002	92.2125	95.1563
15.36	2020-07-19 07:50:00	191.457	88.0198	92.0341
16.12	2020-07-19 07:55:00	275.884	86.8601	88.109
16.96	2020-07-19 08:00:00	309.405	81.8021	86.6817
17.64	2020-07-19 08:05:00	274.655	80.58	82.0876
18.33	2020-07-19 08:10:00	280.913	79.2686	80.9903
18.74	2020-07-19 08:15:00	299.519	78.323	79.5719
19.08	2020-07-19 08:20:00	311.295	76.3516	78.3498
19.48	2020-07-19 08:25:00	322.877	76.1196	77.8502
19.94	2020-07-19 08:30:00	307.527	72.6495	77.1544
20.29	2020-07-19 08:35:00	259.64	71.8823	75.2187
20.76	2020-07-19 08:40:00	246.595	72.4889	74.1749
21.01	2020-07-19 08:45:00	230.714	71.5166	74.0233
21.33	2020-07-19 08:50:00	220.326	68.9921	73.0063
21.76	2020-07-19 08:55:00	203.765	70.1785	72.2481
22.18	2020-07-19 09:00:00	209.681	68.6887	72.712
22.43	2020-07-19 09:05:00	192.626	66.5032	69.3221
22.65	2020-07-19 09:10:00	241.347	65.2097	67.3863
23.03	2020-07-19 09:15:00	295.294	64.3622	67.5826
23.49	2020-07-19 09:20:00	551.738	61.802	66.7976
24.01	2020-07-19 09:25:00	848.389	60.1071	62.8993
24.34	2020-07-19 09:30:00	1037.18	56.2891	59.8573
24.5	2020-07-19 09:35:00	1086.75	56.5567	59.5005
24.61	2020-07-19 09:40:00	1169.12	56.3337	58.7868
24.95	2020-07-19 09:45:00	1205.26	56.0036	58.2248
25.22	2020-07-19 09:50:00	1257.74	54.496	56.3247
25.48	2020-07-19 09:55:00	1301.89	54.0767	55.7984
25.72	2020-07-19 10:00:00	1353.08	53.4166	54.6833
26.01	2020-07-19 10:05:00	1394.9	52.4799	54.0589
26.28	2020-07-19 10:10:00	1435.1	51.0348	52.7386
26.51	2020-07-19 10:15:00	1473.47	49.7056	52.8189
26.73	2020-07-19 10:20:00	1503.68	49.6432	51.24
26.73	2020-07-19 10:25:00	1537.63	49.5361	50.6155
26.92	2020-07-19 10:30:00	1559.63	48.4121	50.9991
27.14	2020-07-19 10:35:00	1581.95	48.2337	49.4826
27.32	2020-07-19 10:40:00	1604.58	47.0919	49.0544
27.24	2020-07-19 10:45:00	1624.24	47.5468	48.4835
27.25	2020-07-19 10:50:00	1644.14	47.3684	48.6619
27.29	2020-07-19 10:55:00	1664.28	47.8412	49.554
27.44	2020-07-19 11:00:00	1681.26	47.0205	48.769
27.44	2020-07-19 11:05:00	1701.86	47.4487	48.6976
27.45	2020-07-19 11:10:00	1719.21	47.2881	49.1436
27.69	2020-07-19 11:15:00	1736.75	47.2435	48.6441
27.77	2020-07-19 11:20:00	1750.91	46.4317	48.421
27.86	2020-07-19 11:25:00	1768.76	47.3773	49.7948
27.9	2020-07-19 11:30:00	1794.07	46.9045	48.43
27.76	2020-07-19 11:35:00	1278.33	46.4674	48.4746
27.11	2020-07-19 11:40:00	1435.1	48.0553	50.2676
27.49	2020-07-19 11:45:00	1816.05	47.1008	49.9911
27.93	2020-07-19 11:50:00	1808.7	45.7359	47.2881
28.11	2020-07-19 11:55:00	1816.05	45.9857	46.9581
28.46	2020-07-19 12:00:00	1823.44	45.2007	46.9581
28.53	2020-07-19 12:05:00	1842.04	45.3167	47.1008
28.58	2020-07-19 12:10:00	1805.03	44.8171	47.1989
28.69	2020-07-19 12:15:00	1569.16	45.3256	46.6548
28.34	2020-07-19 12:20:00	1857.05	45.3523	47.0562
28.51	2020-07-19 12:25:00	1797.72	45.049	47.8412
28.45	2020-07-19 12:30:00	1864.61	45.1918	46.4942
28.27	2020-07-19 12:35:00	1864.61	45.6021	47.0473
28.49	2020-07-19 12:40:00	1868.39	44.8885	46.6191
28.73	2020-07-19 12:45:00	1872.19	44.9509	46.8956
28.94	2020-07-19 12:50:00	1872.19	43.9875	45.4237
28.9	2020-07-19 12:55:00	1875.99	44.2373	45.8162
28.78	2020-07-19 13:00:00	1875.99	44.0589	45.8697
28.84	2020-07-19 13:05:00	1875.99	45.2542	46.9135
28.96	2020-07-19 13:10:00	1872.19	44.5227	45.4772
29.05	2020-07-19 13:15:00	1872.19	44.041	44.9955
28.89	2020-07-19 13:20:00	1872.19	44.6744	45.9768
28.86	2020-07-19 13:25:00	1872.19	44.2997	45.3613
28.85	2020-07-19 13:30:00	1868.39	44.0678	45.3256
28.84	2020-07-19 13:35:00	1864.61	43.8537	45.2721
28.77	2020-07-19 13:40:00	1857.05	44.4692	45.2988
28.81	2020-07-19 13:45:00	1849.53	44.38	46.0838
28.83	2020-07-19 13:50:00	1845.78	43.8002	45.6289
28.63	2020-07-19 13:55:00	1834.58	44.4692	45.3077
28.68	2020-07-19 14:00:00	1823.44	43.372	45.3167
28.84	2020-07-19 14:05:00	1812.37	44.264	45.9857
28.92	2020-07-19 14:10:00	1797.72	43.4076	45.7538
28.87	2020-07-19 14:15:00	1783.18	43.0151	43.6753
28.88	2020-07-19 14:20:00	1765.18	43.1489	44.826
28.94	2020-07-19 14:25:00	1747.36	42.8813	43.7645
29.08	2020-07-19 14:30:00	1708.78	42.8456	44.4157
29.07	2020-07-19 14:35:00	1688.1	42.7297	43.3363
28.95	2020-07-19 14:40:00	1660.91	42.8367	44.5316
28.93	2020-07-19 14:45:00	1617.66	42.4799	43.1043
28.83	2020-07-19 14:50:00	1572.34	42.9081	43.6039
28.87	2020-07-19 14:55:00	1525.2	43.0062	43.8091
28.84	2020-07-19 15:00:00	1494.56	42.7654	44.1302
28.78	2020-07-19 15:05:00	1449.74	43.0954	44.0945
28.74	2020-07-19 15:10:00	1389.25	43.6663	44.6565
28.83	2020-07-19 15:15:00	1325.89	43.2382	44.8082
28.73	2020-07-19 15:20:00	1265.42	43.1846	43.7466
28.62	2020-07-19 15:25:00	1215.09	43.7288	46.2087
28.51	2020-07-19 15:30:00	1157.32	45.6913	47.306
28.27	2020-07-19 15:35:00	1093.38	46.7618	47.752
27.69	2020-07-19 15:40:00	1062.75	47.7163	49.7413
27.28	2020-07-19 15:45:00	1026.71	49.2328	50.0268
27.12	2020-07-19 15:50:00	975.917	49.2417	50.2498
27.08	2020-07-19 15:55:00	907.156	49.5183	50.7137
27.06	2020-07-19 16:00:00	888.93	49.6521	50.2944
27.05	2020-07-19 16:05:00	844.952	49.3399	50.2587
27.1	2020-07-19 16:10:00	311.927	49.2864	49.9732
27.23	2020-07-19 16:15:00	157.531	49.3131	49.8573
27.22	2020-07-19 16:20:00	164.19	48.8046	49.8662
27.13	2020-07-19 16:25:00	188.871	48.6173	49.9376
27.13	2020-07-19 16:30:00	256.967	49.6699	50.2498
27.05	2020-07-19 16:35:00	288.775	49.7948	50.3925
26.85	2020-07-19 16:40:00	257.28	49.7413	50.9545
26.42	2020-07-19 16:45:00	179.673	50.4193	52.6673
25.49	2020-07-19 16:50:00	41.3447	52.7386	56.8689
24.24	2020-07-19 16:55:00	25.1512	56.9046	60.2498
23.47	2020-07-19 17:00:00	22.2225	60.3926	61.8109
23.03	2020-07-19 17:05:00	20.931	61.8734	63.0063
22.78	2020-07-19 17:10:00	19.7707	63.042	64.3355
22.6	2020-07-19 17:15:00	17.6002	64.3176	64.9599
22.42	2020-07-19 17:20:00	15.3096	64.3355	64.9778
22.29	2020-07-19 17:25:00	12.923	64.7012	65.6736
22.16	2020-07-19 17:30:00	10.5215	65.3613	65.6647
22.06	2020-07-19 17:35:00	8.57141	65.5487	66.414
21.92	2020-07-19 17:40:00	7.51207	66.4407	68.6798
21.38	2020-07-19 17:45:00	6.38625	68.8226	72.8636
20.73	2020-07-19 17:50:00	4.69104	72.9707	74.6477
20.3	2020-07-19 17:55:00	3.13868	74.7459	76.307
19.9	2020-07-19 18:00:00	2.0495	76.3783	77.8859
19.44	2020-07-19 18:05:00	1.52701	77.9484	80.5175
19.04	2020-07-19 18:10:00	1.2929	80.5264	81.8467
18.8	2020-07-19 18:15:00	1.14933	81.9181	82.6317
18.56	2020-07-19 18:20:00	1.10361	81.695	83.5773
18.3	2020-07-19 18:25:00	1.09914	83.6219	84.8976
18.08	2020-07-19 18:30:00	1.09914	84.8083	85.6112
17.85	2020-07-19 18:35:00	1.10137	85.6112	86.3249
17.67	2020-07-19 18:40:00	1.10585	86.4141	87.4845
17.55	2020-07-19 18:45:00	1.11035	86.9493	87.5737
17.4	2020-07-19 18:50:00	1.11486	87.3953	88.3766
17.26	2020-07-19 18:55:00	1.11713	88.3766	88.7334
17.16	2020-07-19 19:00:00	1.1194	88.7334	89.3579
17.1	2020-07-19 19:05:00	1.12167	89.0011	89.6255
16.99	2020-07-19 19:10:00	1.12395	88.8226	89.6255
16.88	2020-07-19 19:15:00	1.12623	89.5363	90.0715
16.82	2020-07-19 19:20:00	1.12852	89.8039	90.5176
16.73	2020-07-19 19:25:00	1.13082	89.8039	90.6068
16.68	2020-07-19 19:30:00	1.13311	90.3391	90.7852
16.65	2020-07-19 19:35:00	1.13311	90.3391	90.8744
16.61	2020-07-19 19:40:00	1.13311	90.7852	90.9636
16.57	2020-07-19 19:45:00	1.13541	90.8744	91.142
16.51	2020-07-19 19:50:00	1.13541	90.3391	91.4096
16.44	2020-07-19 19:55:00	1.13772	90.9636	91.4988
16.4	2020-07-19 20:00:00	1.14003	91.2312	91.588
16.33	2020-07-19 20:05:00	1.14003	91.3204	91.7665
16.27	2020-07-19 20:10:00	1.14003	91.4988	91.7665
16.18	2020-07-19 20:15:00	1.14235	91.3204	92.0341
16.13	2020-07-19 20:20:00	1.14235	91.9449	92.4801
16.1	2020-07-19 20:25:00	1.14235	91.8557	92.4801
16.05	2020-07-19 20:30:00	1.14467	92.0341	92.3017
16.02	2020-07-19 20:35:00	1.14467	92.1233	92.6585
15.94	2020-07-19 20:40:00	1.147	91.7665	92.3017
15.87	2020-07-19 20:45:00	1.147	92.2125	92.6585
15.8	2020-07-19 20:50:00	1.147	92.3017	92.5693
15.76	2020-07-19 20:55:00	1.14933	92.5693	92.8369
15.72	2020-07-19 21:00:00	1.15166	92.5693	92.8369
15.68	2020-07-19 21:05:00	1.15166	92.7477	93.0153
15.66	2020-07-19 21:10:00	1.15166	92.8369	93.1045
15.63	2020-07-19 21:15:00	1.15166	92.6585	93.0153
15.57	2020-07-19 21:20:00	1.154	92.6585	93.1045
15.59	2020-07-19 21:25:00	1.154	93.1045	93.3722
15.56	2020-07-19 21:30:00	1.154	92.8369	93.1938
15.49	2020-07-19 21:35:00	1.154	92.8369	92.9261
15.43	2020-07-19 21:40:00	1.15634	92.9261	93.3722
15.39	2020-07-19 21:45:00	1.15869	92.7477	93.3722
15.39	2020-07-19 21:50:00	1.15869	93.3722	93.5506
15.39	2020-07-19 21:55:00	1.15869	93.4614	93.6398
15.39	2020-07-19 22:00:00	1.16105	93.3722	93.8182
15.35	2020-07-19 22:05:00	1.16105	93.283	93.6398
15.33	2020-07-19 22:10:00	1.16105	93.3722	93.8182
15.31	2020-07-19 22:15:00	1.16105	93.6398	93.9074
15.3	2020-07-19 22:20:00	1.16105	93.4614	93.9966
15.25	2020-07-19 22:25:00	1.16341	93.5506	93.9074
15.26	2020-07-19 22:30:00	1.16105	93.9074	94.2642
15.27	2020-07-19 22:35:00	1.16341	93.5506	94.3534
15.21	2020-07-19 22:40:00	1.16341	93.5506	94.3534
15.23	2020-07-19 22:45:00	1.16341	93.9966	94.4426
15.22	2020-07-19 22:50:00	1.16341	94.0858	94.2642
15.22	2020-07-19 22:55:00	1.16341	94.175	94.4426
15.21	2020-07-19 23:00:00	1.16341	94.0858	94.5319
15.18	2020-07-19 23:05:00	1.16341	94.0858	94.3534
15.16	2020-07-19 23:10:00	1.16577	94.0858	94.5319
15.2	2020-07-19 23:15:00	1.16577	94.3534	94.8887
15.21	2020-07-19 23:20:00	1.16341	94.4426	94.7995
15.23	2020-07-19 23:25:00	1.16341	94.3534	94.7995
15.18	2020-07-19 23:30:00	1.16577	94.2642	94.5319
15.15	2020-07-19 23:35:00	1.16577	94.3534	94.5319
15.12	2020-07-19 23:40:00	1.16577	94.175	94.5319
15.06	2020-07-19 23:45:00	1.16577	94.2642	94.6211
15.06	2020-07-19 23:50:00	1.16814	94.4426	94.7995
15.08	2020-07-19 23:55:00	1.16577	94.6211	94.9779
15.05	2020-07-20	1.16814	94.3534	94.7103
14.96	2020-07-20 00:05:00	1.16814	94.175	94.5319
14.91	2020-07-20 00:10:00	1.16814	94.3534	94.7995
14.93	2020-07-20 00:15:00	1.17051	94.7103	95.0671
14.88	2020-07-20 00:20:00	1.17051	94.5319	94.8887
14.81	2020-07-20 00:25:00	1.17051	94.4426	94.7995
14.84	2020-07-20 00:30:00	1.17051	94.7995	95.3347
14.84	2020-07-20 00:35:00	1.17051	94.8887	95.1563
14.78	2020-07-20 00:40:00	1.17289	94.7103	94.8887
14.73	2020-07-20 00:45:00	1.17289	94.7103	94.9779
14.74	2020-07-20 00:50:00	1.17289	94.9779	95.2455
14.79	2020-07-20 00:55:00	1.17051	95.1563	95.4239
14.72	2020-07-20 01:00:00	1.17289	94.7103	95.1563
14.65	2020-07-20 01:05:00	1.17527	94.7995	94.9779
14.64	2020-07-20 01:10:00	1.17527	94.8887	95.2455
14.54	2020-07-20 01:15:00	1.17527	94.5319	94.9779
14.47	2020-07-20 01:20:00	1.17766	94.7103	94.8887
14.42	2020-07-20 01:25:00	1.17766	94.7995	94.9779
14.32	2020-07-20 01:30:00	1.18005	94.6211	94.7995
14.21	2020-07-20 01:35:00	1.18005	94.2642	94.6211
14.19	2020-07-20 01:40:00	1.18005	94.5319	95.1563
14.16	2020-07-20 01:45:00	1.18245	94.7995	95.1563
14.09	2020-07-20 01:50:00	1.18245	94.7103	94.9779
13.98	2020-07-20 01:55:00	1.18485	94.3534	94.9779
13.9	2020-07-20 02:00:00	1.18485	94.5319	94.8887
13.83	2020-07-20 02:05:00	1.18726	94.7103	94.9779
13.77	2020-07-20 02:10:00	1.18967	94.5319	94.9779
13.71	2020-07-20 02:15:00	1.18967	94.6211	94.9779
13.69	2020-07-20 02:20:00	1.18967	94.8887	95.1563
13.63	2020-07-20 02:25:00	1.18967	94.7995	95.0671
13.59	2020-07-20 02:30:00	1.19209	94.7995	95.3347
13.6	2020-07-20 02:35:00	1.19209	95.0671	95.3347
13.52	2020-07-20 02:40:00	1.19209	94.4426	95.1563
13.45	2020-07-20 02:45:00	1.19451	94.4426	95.4239
13.52	2020-07-20 02:50:00	1.19451	94.8887	95.6023
13.42	2020-07-20 02:55:00	1.19694	94.6211	94.8887
13.37	2020-07-20 03:00:00	1.19694	94.7995	94.9779
13.33	2020-07-20 03:05:00	1.19694	94.6211	95.0671
13.28	2020-07-20 03:10:00	1.19694	94.6211	95.1563
13.22	2020-07-20 03:15:00	1.19694	94.6211	95.0671
13.21	2020-07-20 03:20:00	1.19694	94.8887	95.1563
13.16	2020-07-20 03:25:00	1.19937	94.7995	94.9779
13.12	2020-07-20 03:30:00	1.19694	94.7103	94.9779
13.1	2020-07-20 03:35:00	1.19937	94.7995	94.9779
13.05	2020-07-20 03:40:00	1.19937	94.8887	94.9779
13	2020-07-20 03:45:00	1.19937	94.8887	95.0671
12.97	2020-07-20 03:50:00	1.19937	94.9779	95.0671
12.94	2020-07-20 03:55:00	1.20181	94.9779	95.1563
12.92	2020-07-20 04:00:00	1.20181	95.0671	95.1563
12.85	2020-07-20 04:05:00	1.20181	94.6211	95.0671
12.79	2020-07-20 04:10:00	1.20425	94.7103	95.0671
12.78	2020-07-20 04:15:00	1.20425	94.9779	95.1563
12.77	2020-07-20 04:20:00	1.20425	95.0671	95.2455
12.75	2020-07-20 04:25:00	1.20425	94.8887	95.2455
12.68	2020-07-20 04:30:00	1.20669	94.7995	95.0671
12.67	2020-07-20 04:35:00	1.20669	94.9779	95.1563
12.68	2020-07-20 04:40:00	1.20425	95.0671	95.5131
12.72	2020-07-20 04:45:00	1.20425	95.2455	95.5131
12.69	2020-07-20 04:50:00	1.20669	94.9779	95.3347
12.63	2020-07-20 04:55:00	1.20669	94.8887	95.0671
12.63	2020-07-20 05:00:00	1.20425	95.0671	95.2455
12.63	2020-07-20 05:05:00	1.20669	95.1563	95.3347
12.72	2020-07-20 05:10:00	1.20669	95.3347	95.7807
12.75	2020-07-20 05:15:00	1.20425	95.3347	95.7807
12.76	2020-07-20 05:20:00	1.20425	95.3347	95.6023
12.86	2020-07-20 05:25:00	1.20181	95.5131	95.7807
12.92	2020-07-20 05:30:00	1.20181	95.6023	95.7807
12.97	2020-07-20 05:35:00	1.20181	95.4239	95.7807
13.01	2020-07-20 05:40:00	1.20181	95.4239	95.7807
13.05	2020-07-20 05:45:00	1.19937	95.4239	95.8699
13.14	2020-07-20 05:50:00	1.19937	95.7807	95.8699
13.14	2020-07-20 05:55:00	1.19937	95.5131	95.7807
13.14	2020-07-20 06:00:00	1.19694	95.3347	95.7807
13.11	2020-07-20 06:05:00	1.19451	95.3347	95.6023
13.16	2020-07-20 06:10:00	1.19451	95.5131	95.7807
13.12	2020-07-20 06:15:00	1.19209	95.4239	95.6023
13.13	2020-07-20 06:20:00	1.19209	95.4239	95.6915
13.16	2020-07-20 06:25:00	1.19209	95.6023	95.6915
13.15	2020-07-20 06:30:00	1.19937	95.5131	95.6915
13.16	2020-07-20 06:35:00	1.22148	95.6023	95.7807
13.2	2020-07-20 06:40:00	1.29816	95.6915	95.8699
13.23	2020-07-20 06:45:00	1.47223	95.7807	95.9592
13.29	2020-07-20 06:50:00	1.81085	95.6915	96.0484
13.27	2020-07-20 06:55:00	2.36717	95.6915	95.7807
13.34	2020-07-20 07:00:00	3.40412	95.6915	95.9592
13.39	2020-07-20 07:05:00	5.30929	95.6915	95.8699
13.47	2020-07-20 07:10:00	7.55795	95.6915	95.7807
13.56	2020-07-20 07:15:00	9.52547	95.5131	95.6915
13.68	2020-07-20 07:20:00	11.9784	95.4239	95.6915
13.8	2020-07-20 07:25:00	16.6718	95.4239	95.6023
13.95	2020-07-20 07:30:00	18.8575	95.3347	95.6023
14.11	2020-07-20 07:35:00	15.9989	95.3347	95.5131
14.25	2020-07-20 07:40:00	16.7464	95.3347	95.5131
14.42	2020-07-20 07:45:00	20.9906	95.4239	95.6915
14.62	2020-07-20 07:50:00	23.873	95.4239	95.7807
14.76	2020-07-20 07:55:00	24.6559	95.1563	95.5131
14.96	2020-07-20 08:00:00	33.0454	95.2455	95.6915
15.16	2020-07-20 08:05:00	64.1706	94.7995	95.2455
15.39	2020-07-20 08:10:00	82.4502	94.5319	94.8887
15.77	2020-07-20 08:15:00	146.135	94.7103	94.9779
16.37	2020-07-20 08:20:00	182.614	93.5506	94.7103
16.78	2020-07-20 08:25:00	239.492	93.4614	93.8182
17.59	2020-07-20 08:30:00	318.969	90.9636	93.729
18.67	2020-07-20 08:35:00	326.833	85.7896	90.696
19.01	2020-07-20 08:40:00	295.294	83.1223	86.1464
19.79	2020-07-20 08:45:00	333.534	80.4908	83.4524
20.58	2020-07-20 08:50:00	237.363	77.77	80.4462
20.43	2020-07-20 08:55:00	159.85	78.1982	81.0974
19.94	2020-07-20 09:00:00	170.68	79.8663	83.2116
20.73	2020-07-20 09:05:00	273.321	77.4131	82.7031
21.58	2020-07-20 09:10:00	269.137	75.7539	77.4577
21.86	2020-07-20 09:15:00	161.677	72.703	77.8235
21.45	2020-07-20 09:20:00	175.849	77.8056	79.4292
21.28	2020-07-20 09:25:00	416.962	78.439	81.811
22.22	2020-07-20 09:30:00	836.421	72.2927	78.1714
23.01	2020-07-20 09:35:00	940.909	66.9225	74.0679
23.07	2020-07-20 09:40:00	656.955	66.7708	68.2249
23.6	2020-07-20 09:45:00	836.421	63.0866	66.2802
23.83	2020-07-20 09:50:00	1030.89	62.0607	64.2284
24.34	2020-07-20 09:55:00	1147.96	60.8386	63.3274
25.1	2020-07-20 10:00:00	1414.86	58.3586	60.7315
25.81	2020-07-20 10:05:00	1464.53	56.4318	59.6343
26.15	2020-07-20 10:10:00	1129.47	55.9501	57.6896
25.91	2020-07-20 10:15:00	958.253	56.7797	58.7779
25.4	2020-07-20 10:20:00	826.297	58.4211	59.9644
26.14	2020-07-20 10:25:00	1660.91	54.7101	60.0357
27.13	2020-07-20 10:30:00	1417.73	54.4514	55.9322
[truncated: 25,090 more rows]

## Sheet: Metadata3
DO3SE model inputs
	Parameter	Description	Detail/Units
	Day_of_year		1 to 365
	Hour_of_day		1 to 24
	Air_Temp_avg	Centigrade	Average Air Temperature
	VPD_avg	kPa	Average Vapour Pressure Deficit
	PAR_avg	umol/m2/s	Average Photosynthetic Active Radiation
	Pa	hPa	Atmosheric Pressure
	wind	m/s	Wind speed
	ppt	mm	Rainfall (soil mositure not enabled)
	Cham1_avg	ppb	Average O3 concentration Chamber 1
	Cham2_avg	ppb	Average O3 concentration Chamber 2
	Cham3_avg	ppb	Average O3 concentration Chamber 3
	Cham4_avg	ppb	Average O3 concentration Chamber 4
	Cham5_avg	ppb	Average O3 concentration Chamber 5
	Cham6_avg	ppb	Average O3 concentration Chamber 6
	Cham7_avg	ppb	Average O3 concentration Chamber 7
	Cham8_avg	ppb	Average O3 concentration Chamber 8
	Cham9_avg	ppb	Average O3 concentration Chamber 9

## Sheet: Data3
day_of_year	Hour	Air_Temp_avg	VPD_avg	PAR_avg	Pa	wind	ppt	Cham1_avg	Cham2_avg	Cham3_avg	Cham4_avg	Cham5_avg	Cham6_avg	Cham7_avg	Cham8_avg	Cham9_avg
195	12	28.7108	2.04564	1577.95	101	0.75	0	19.6103	18.4469	19.2149	19.2769	17.8067	19.396	19.0102	18.6864	19.0292
195	13	29.8517	2.33656	1611.39	101	0.75	0	20.0873	19.0621	19.7017	20.0192	19.25	19.5384	18.9384	18.9619	18.8179
195	14	29.85	2.34256	1493.07	101	0.75	0	18.9072	19.4153	18.4256	18.9442	17.482	19.0018	19.104	18.5066	18.8522
195	15	29.365	2.23579	1210.9	101	0.75	0	18.3792	17.4642	17.5303	17.3893	16.8238	18.1027	17.2127	17.4233	17.9041
195	16	27.2683	1.8215	256.893	101	0.75	0	16.5039	15.958	16.2269	15.6831	13.9126	16.1927	14.8314	15.3384	15.9177
195	17	21.2992	0.651775	13.0977	101	0.75	0	8.55648	7.78792	8.3595	8.69912	7.70994	8.91823	8.40019	7.10777	8.9453
195	18	18.6733	0.314923	1.22584	101	0.75	0	4.81655	4.5991	5.33667	5.60226	4.38028	5.09109	5.55293	5.19675	5.13476
195	19	17.4567	0.234565	1.12606	101	0.75	0	5.40082	4.96407	5.47666	5.30293	5.19448	4.77357	5.02204	5.31199	5.20669
195	20	16.7558	0.18986	1.14042	101	0.75	0	4.17533	4.92909	4.4453	4.50241	4.39431	4.6981	4.58668	3.84293	4.86603
195	21	16.3708	0.174435	1.14875	101	0.75	0	3.7544	3.99021	4.01978	4.44169	3.76074	4.54166	4.44543	4.13318	3.96901
195	22	15.9908	0.156482	1.15635	101	0.75	0	3.88136	3.79679	3.4941	3.25289	3.05636	3.66427	3.38762	3.67758	3.90761
195	23	15.7925	0.147544	1.15987	101	0.75	0	4.21797	3.92638	3.72034	4.15005	3.76963	3.86576	3.76393	4.25098	3.83343
196	0	15.3642	0.13843	1.16775	101	0.75	0	4.94451	5.0076	4.90759	4.67432	4.47847	4.28638	4.57335	5.27275	5.83246
196	1	15.05	0.135524	1.17368	101	0.75	0	5.52576	5.3176	5.21485	5.15411	5.24888	5.08655	4.7706	5.15666	4.79968
196	2	14.8333	0.14318	1.17826	101	0.75	0	5.74398	5.43815	5.4384	5.76305	4.93517	5.05154	5.1524	5.96752	5.49738
196	3	14.7175	0.157274	1.18145	101	0.75	0	6.37532	6.04051	5.70155	6.49686	5.57353	6.47547	5.62333	5.10604	6.66602
196	4	14.1392	0.141573	1.18927	101	0.75	0	5.4745	5.08002	4.6542	5.19346	5.3238	5.05338	5.16798	5.90291	5.50116
196	5	13.595	0.140782	1.19734	101	0.75	0	5.54231	5.56261	5.51157	5.16951	5.16438	4.58088	4.79167	5.82165	5.75
196	6	13.0858	0.143704	1.45034	101	0.75	0	5.98628	5.44116	5.21353	5.67924	5.15993	5.05083	4.8852	5.02488	5.38242
196	7	13.4975	0.176416	40.7419	101	0.75	0	5.37246	5.02425	4.86191	4.6384	5.05285	5.60233	4.20091	4.89402	5.15906
196	8	19.0317	0.825683	266.425	101	0.75	0	9.86134	10.3027	8.81804	9.47569	8.68664	8.83407	8.70511	8.40606	8.58466
196	9	24.2942	1.84878	785.263	101	0.75	0	19.6384	18.8071	17.8292	18.7954	17.9138	18.5877	18.4437	18.9004	18.9552
196	10	26.185	2.14222	1555.44	101	0.75	0	21.2958	20.477	21.7133	22.0941	20.8849	20.9705	20.7349	20.3719	21.7904
196	11	27.385	2.36616	1787.93	101	0.75	0	23.2713	22.6424	22.2551	23.1691	21.4223	22.1876	21.9595	22.157	22.1503
196	12	28.3492	2.49697	1878.6	101	0.75	0	23.6378	21.8689	21.9784	23.5018	21.8223	22.4958	22.1721	22.6764	23.1374
196	13	29.5608	2.59999	1910.28	101	0.75	0	23.1643	20.9306	21.0033	22.2429	21.2845	22.2136	21.4202	21.4079	21.9349
196	14	28.835	2.34092	1727.48	101	0.75	0	23.1535	21.2779	22.4807	21.7023	21.382	21.7307	21.7737	21.2696	22.0477
196	15	27.2333	2.06817	1145.9	101	0.75	0	23.5394	22.6632	22.7797	21.6887	21.3402	22.7505	23.2851	21.951	22.3143
196	16	25.3783	1.76969	258.503	101	0.75	0	23.7607	22.094	21.7589	21.9991	21.5421	22.414	22.3287	23.4973	22.7248
196	17	20.9217	1.03666	13.0122	101	0.75	0	19.3962	17.181	16.8903	19.4898	18.5507	18.6824	18.6183	18.9103	17.5299
196	18	17.6583	0.535397	1.27377	101	0.75	0	12.6301	12.7266	14.1262	13.4928	12.7628	10.9917	12.2016	12.9052	11.379
196	19	16.6708	0.477132	1.13966	101	0.75	0	14.9945	14.7878	13.5774	14.2514	14.0686	13.9373	13.394	13	12.6175
196	20	15.8067	0.397223	1.15383	101	0.75	0	13.6677	11.1945	11.0719	12.6478	11.0709	11.4598	10.9209	11.5507	11.8257
196	21	14.2325	0.229987	1.17767	101	0.75	0	11.7994	9.6295	9.47218	10.3723	9.18662	9.52612	9.92921	10.7003	9.94518
196	22	13.5392	0.169837	1.19108	101	0.75	0	10.1425	8.70358	8.65878	9.34028	8.17172	8.56791	9.10577	9.29992	9.20332
196	23	13.005	0.139458	1.20059	101	0.75	0	8.05052	7.48808	6.75724	8.37898	7.13031	6.87851	7.62259	8.47777	7.63171
197	0	12.5342	0.122879	1.21079	101	0.75	0	7.5476	6.90831	6.93227	7.89376	7.18419	7.30361	7.71067	7.31411	7.53692
197	1	12.1183	0.10965	1.21777	101	0.75	0	6.634	6.79502	6.77634	7.02141	6.3164	6.50925	6.15816	6.55354	6.52482
197	2	11.9583	0.101283	1.22148	101	0.75	0	6.95854	6.57071	5.6256	6.2916	6.16644	6.35879	7.51478	6.6893	7.03202
197	3	11.9758	0.105304	1.22168	101	0.75	0	8.29837	8.23784	8.3064	8.55687	8.84794	7.15144	9.1006	9.06333	7.60997
197	4	12.03	0.102392	1.22168	101	0.75	0	10.1291	8.62706	8.46978	10.5034	9.37363	9.23366	10.0027	9.75158	9.26628
197	5	12.1883	0.104198	1.21962	101	0.75	0	10.458	9.37308	9.87659	10.1676	9.35453	9.56474	9.51524	9.75683	9.5519
197	6	12.2142	0.101633	1.51918	101	0.75	0	9.46972	8.52893	8.70993	8.78265	7.87409	7.76419	8.7669	8.71699	7.51977
197	7	13.1592	0.1457	42.6059	101	0.75	0	8.9482	8.27881	8.21589	8.93945	8.22133	8.61575	9.18912	9.42538	8.80759
197	8	21.4758	1.10219	265.375	101	0.75	0	21.582	25.6213	21.2462	18.0963	25.3141	21.0659	39.9462	39.5227	62.8507
197	9	24.5367	1.54769	722.191	101	0.75	0	23.562	38.995	46.7459	21.8874	34.6049	52.0015	40.9111	73.259	107.329
197	10	26.3233	1.85036	1536.85	101	0.75	0	25.8649	40.1966	53.8415	25.6895	37.1584	61.971	41.9486	66.8982	116.909
197	11	27.7217	2.06354	1781.49	101	0.75	0	27.2912	43.9311	63.9973	26.0899	40.4208	71.0091	47.3254	79.6044	101.475
197	12	28.75	2.22854	1885.63	101	0.75	0	28.1047	45.6097	63.9124	27.0978	35.7402	73.9445	50.4461	84.7926	135.213
197	13	28.6142	2.16931	1877.69	101	0.75	0	28.1504	46.7084	64.7534	27.4712	36.2261	76.2396	50.8494	84.6665	135.761
197	14	28.4708	2.1074	1678.16	101	0.75	0	28.494	46.1947	64.2348	27.1631	36.366	74.4039	52.202	84.7947	138.937
197	15	27.355	1.81878	1130.16	101	0.75	0	28.9674	46.7107	64.9489	28.2139	36.0009	74.6065	52.3995	85.5183	143.112
197	16	25.73	1.49096	262.645	101	0.75	0	28.9869	36.7066	47.6073	26.6662	32.5734	57.9976	45.0934	65.5858	73.7192
197	17	21.5375	0.834577	14.5545	101	0.75	0	24.5608	22.9866	23.5423	23.8623	22.1257	22.6705	25.8076	22.7841	23.193
197	18	18.2267	0.34836	1.2536	101	0.75	0	11.9669	11.5069	11.4847	11.4111	11.0945	11.0208	13.4091	10.9048	10.4177
197	19	16.5125	0.198804	1.13735	101	0.75	0	9.24189	8.27121	8.44238	9.35182	9.39896	9.11942	10.348	9.15972	8.92389
197	20	17.3875	0.42938	1.13833	101	0.75	0	23.1186	20.9591	21.1333	21.36	19.925	19.9956	21.9829	19.3307	20.0072
197	21	17.1608	0.460219	1.13583	101	0.75	0	18.5008	16.2886	16.7137	17.7405	16.157	15.2125	17.4128	17.1583	15.1245
197	22	14.9708	0.189215	1.16697	101	0.75	0	11.1493	10.5601	11.4327	10.7747	9.51535	9.97013	11.5608	10.335	10.8249
197	23	14.1533	0.131301	1.18305	101	0.75	0	9.92992	8.36729	8.19812	8.74921	8.20123	8.36564	9.17748	8.73081	8.08695
198	0	13.7475	0.114754	1.19249	101	0.75	0	8.86667	9.02326	9.14129	8.97358	8.81764	9.20078	9.3145	9.27472	8.90295
198	1	13.12	0.107331	1.20344	101	0.75	0	8.15114	6.50797	6.28989	6.76752	6.7185	6.14646	6.97048	6.83765	6.47062
198	2	12.6317	0.0933844	1.21263	101	0.75	0	5.81113	5.19346	4.72341	5.00525	5.34839	4.53231	5.39466	5.12658	4.89136
198	3	12.33	0.0857864	1.21859	101	0.75	0	6.03747	5.91101	4.08916	5.11563	5.09407	5.59064	5.00512	4.93979	5.39699
198	4	11.8067	0.0797626	1.22624	101	0.75	0	4.26141	3.40598	4.02689	3.6	4.66797	3.33936	4.22054	3.5746	3.74693
198	5	11.5567	0.0750274	1.23102	101	0.75	0	3.98195	3.80624	3.88595	3.86786	4.41239	3.38513	3.53805	3.62623	3.36261
198	6	10.9075	0.0709577	1.56141	101	0.75	0	3.99056	3.42907	3.5719	4.12185	2.94856	3.30353	3.10556	3.30369	2.78729
198	7	11.4258	0.0934908	47.2167	101	0.75	0	3.70303	3.83275	3.35706	3.12983	5.88027	3.51569	6.00279	3.17268	7.04326
198	8	17.7	0.506601	265.342	101	0.75	0	12.4982	45.6117	9.78888	12.4534	35.777	13.2039	54.7742	7.64252	228.663
198	9	22.8217	1.54557	686.816	101	0.75	0	21.1651	51.9046	19.4724	20.3502	37.9853	18.8426	63.191	20.6841	227.829
198	10	25.6475	2.04395	1463.07	101	0.75	0	26.2868	48.7454	53.1035	24.9895	35.0761	59.1256	51.6749	63.4193	162.401
198	11	27.1983	2.24723	1722.91	101	0.75	0	28.8235	47.678	66.7345	28.4674	36.8593	78.6803	52.1376	91.3692	121.876
198	12	28.3133	2.42303	1824.12	101	0.75	0	29.4766	47.5412	67.1286	28.603	37.9264	76.8587	54.847	88.2441	128.232
198	13	28.855	2.53285	1835.24	101	0.75	0	30.867	49.4415	65.2939	28.6728	38.9508	77.4794	54.9565	87.5092	137.18
198	14	29.0575	2.54735	1658.28	101	0.75	0	32.0777	51.3171	70.1976	30.5335	40.6989	79.4243	56.8001	92.226	142.963
198	15	27.7908	2.23555	1117.55	101	0.75	0	32.6965	49.8837	69.8216	31.9491	40.2944	79.7791	57.1268	98.5924	138.729
198	16	26.095	1.91423	264.692	101	0.75	0	32.4366	40.5486	49.946	30.8809	35.2224	58.971	47.4373	76.3175	70.7673
198	17	19.7775	0.835389	13.3161	101	0.75	0	18.377	17.5894	17.2668	18.5776	17.4656	17.2758	23.2237	18.9072	18.4074
198	18	15.5983	0.305399	1.32154	101	0.75	0	11.5677	11.5967	10.6537	11.3365	11.6712	12.732	14.5486	11.2993	11.5692
198	19	13.9417	0.192904	1.18187	101	0.75	0	12.7224	11.6797	10.9034	11.757	11.0724	11.8352	13.6803	12.2907	11.449
198	20	12.81	0.150405	1.20446	101	0.75	0	12.7192	11.6455	12.1268	11.8559	11.8709	11.6714	14.4251	12.6676	12.9288
198	21	12.0992	0.137996	1.2186	101	0.75	0	12.6618	11.9987	12.2075	11.4192	11.5166	11.9622	13.0898	11.6705	12.9461
198	22	11.5508	0.118084	1.23061	101	0.75	0	11.7293	11.164	11.21	10.6637	10.7936	10.2944	11.9184	11.3993	11.086
198	23	11.0683	0.099576	1.23917	101	0.75	0	10.358	9.58516	9.53607	9.33286	9.67244	8.91541	10.8524	10.0586	9.729
199	0	10.83	0.0888238	1.24463	101	0.75	0	9.66548	8.62044	8.64901	9.47287	9.11401	9.00473	10.3964	9.58201	9.4158
199	1	10.7342	0.0809229	1.24694	101	0.75	0	7.5661	8.07479	7.79513	7.96997	8.26569	7.39518	8.13894	7.63559	7.80172
199	2	10.615	0.0790086	1.24821	101	0.75	0	6.79466	7.12119	6.57588	5.99244	6.67016	6.49325	6.37046	6.78514	6.469
199	3	10.5008	0.0732574	1.25117	101	0.75	0	6.07323	5.44746	5.90263	5.5932	5.0315	4.73682	4.64646	5.09173	5.0185
199	4	10.3083	0.0674342	1.2535	101	0.75	0	3.78948	3.83617	3.49014	4.13515	4.17409	4.52337	4.04175	4.11653	3.944
199	5	10.0492	0.0622416	1.25775	101	0.75	0	2.79591	2.20008	2.53397	2.22576	1.95116	2.01923	2.81397	1.77489	2.40296
199	6	9.88667	0.0601977	1.58534	101	0.75	0	2.69202	2.31126	1.62604	2.44113	2.04938	2.44019	2.1376	2.01398	2.09455
199	7	10.6467	0.0829582	44.8399	101	0.75	0	2.88678	3.1323	2.3205	2.45204	5.36405	2.65149	5.00584	6.82319	5.80729
199	8	17.07	0.417753	266.004	101	0.75	0	12.5899	37.7477	32.2255	8.33846	20.6432	49.1531	36.7303	98.1047	145.603
199	9	21.9475	1.10424	600.373	101	0.75	0	20.1535	43.4702	60.5945	17.4829	29.5285	73.639	45.6937	95.815	139.59
199	10	25.6758	1.83632	1448.29	101	0.75	0	27.1619	45.5553	65.779	25.5309	34.1691	75.6674	49.4763	93.6254	131.058
199	11	27.1517	1.97015	1715.33	101	0.75	0	28.1578	47.542	65.5159	26.8462	35.1987	76.1416	49.3726	93.4424	128.033
199	12	28.1375	2.0384	1792.48	101	0.75	0	27.9895	47.3231	63.4332	26.8457	36.0093	79.6861	53.0944	95.6489	129.718
199	13	28.475	2.06773	1844.26	101	0.75	0	28.9264	47.0254	66.0212	27.0904	36.6133	86.6379	53.5668	102.014	122.292
199	14	28.6567	2.09653	1676.73	101	0.75	0	29.7817	46.9801	65.7284	27.7785	36.2066	83.821	53.3403	97.1141	130.597
199	15	27.6558	1.90234	1134.83	101	0.75	0	29.9715	47.8861	66.2913	28.2914	36.577	84.8446	54.641	95.3736	128.52
199	16	26.1083	1.60051	281.205	101	0.75	0	29.4344	36.7254	48.1755	28.1638	32.155	61.8584	45.4092	73.4473	68.7744
199	17	21.9458	0.860088	22.6412	101	0.75	0	26.017	23.7723	23.26	21.3487	22.886	23.3627	25.187	22.9911	23.9164
199	18	18.7833	0.349826	1.25747	101	0.75	0	13.3744	12.4659	12.0212	12.6084	11.8294	11.4685	14.7028	12.0739	12.136
199	19	16.9983	0.189495	1.12875	101	0.75	0	8.5727	8.33792	8.3499	8.7621	8.21931	8.60176	9.3333	8.37958	8.55196
199	20	15.8408	0.134029	1.15343	101	0.75	0	9.30739	9.02497	8.69969	8.80273	8.07887	8.80552	9.81502	8.90911	9.00256
199	21	15	0.117891	1.16933	101	0.75	0	10.8782	9.79755	9.67896	9.56831	9.94414	9.92293	10.2137	11.0433	10.392
199	22	14.2667	0.106021	1.18245	101	0.75	0	8.9438	8.59564	8.34505	9.26375	8.93007	8.31821	9.33608	9.01381	8.75833
199	23	13.8117	0.0933411	1.19128	101	0.75	0	7.50608	7.28026	6.71238	6.85636	7.31965	6.68576	7.96829	7.26451	6.76917
200	0	13.5617	0.0842687	1.19674	101	0.75	0	6.9172	6.46664	6.26993	7.07224	7.04687	5.54648	6.61436	6.13258	6.09088
200	1	13.32	0.0795961	1.20099	101	0.75	0	7.05963	6.45409	5.54525	6.42814	5.62033	6.15566	6.78859	6.84427	6.77582
200	2	13.0275	0.0748584	1.20629	101	0.75	0	6.04033	5.98485	6.02191	5.64983	5.72341	5.8017	6.41312	6.01594	5.77402
200	3	12.8258	0.0729927	1.20976	101	0.75	0	5.98633	5.45345	4.98477	5.92174	5.0984	4.99843	5.80425	5.43641	5.55863
200	4	12.4592	0.067978	1.21612	101	0.75	0	5.33243	5.05547	4.06424	4.47024	4.24098	4.85544	5.16046	5.33156	4.27817
200	5	12.255	0.0639437	1.21962	101	0.75	0	4.58303	5.35652	4.17827	4.8347	4.61256	4.8203	4.24107	4.53149	4.15364
200	6	12.2642	0.062811	1.48556	101	0.75	0	5.46058	5.71402	3.50719	5.80677	5.32047	5.44094	5.27281	4.41431	4.51731
200	7	13.2867	0.0941985	47.4484	101	0.75	0	4.95462	3.99097	5.31462	5.74598	6.67514	5.66486	7.55933	9.44378	8.83787
200	8	18.7925	0.451694	278.53	101	0.75	0	12.3669	32.6743	49.9798	10.4304	24.2361	56.7652	38.2906	94.5347	125.284
200	9	23.3375	1.14461	658.355	101	0.75	0	23.4275	43.5161	63.1572	21.0142	32.5423	79.8652	45.6325	97.5348	129.198
200	10	26.0725	1.69249	1487.73	101	0.75	0	25.4851	43.5275	61.2736	24.9411	33.2717	80.9525	45.4698	90.4831	127.591
200	11	27.1183	1.86699	1543.6	101	0.75	0	26.4059	45.0247	62.9034	25.0688	33.8064	78.774	48.2576	92.784	127.519
200	12	28.3425	2.09508	1815.66	101	0.75	0	26.9728	44.8871	62.9868	26.2084	34.243	82.9642	49.3722	91.4107	130.037
200	13	28.0442	2.04347	1657.51	101	0.75	0	27.7429	45.6075	63.5118	26.8668	34.4949	80.9299	50.6958	94.4245	124.044
200	14	27.3975	1.91177	1286.86	101	0.75	0	28.3674	45.2839	61.1588	26.9033	34.7948	82.1132	50.9107	92.4794	122.719
200	15	27.0367	1.83489	1049.5	101	0.75	0	27.0231	45.3733	64.1119	26.1272	34.3002	82.2581	49.3806	88.9626	125.114
200	16	25.2617	1.4529	317.172	101	0.75	0	25.7201	36.7324	49.0183	24.8833	29.0367	49.5225	37.3794	56.9275	75.755
200	17	22.0233	0.870373	20.6625	101	0.75	0	19.8834	19.3492	19.4118	19.5171	19.3619	21.0065	23.5316	21.1695	19.7389
200	18	18.9417	0.389013	1.25384	101	0.75	0	10.844	11.1035	10.3176	10.2247	10.6922	10.9761	12.7546	11.3778	11.524
200	19	16.6033	0.194436	1.13315	101	0.75	0	9.01894	7.98207	6.7185	7.99945	7.58149	7.94412	9.14062	7.95335	7.89604
200	20	15.4008	0.137307	1.15831	101	0.75	0	7.31276	6.36977	7.14288	7.27667	6.81085	6.61745	7.78899	7.66342	7.37058
200	21	14.7975	0.116484	1.17111	101	0.75	0	8.15028	7.49765	7.55034	7.94454	7.07834	7.8545	8.47825	8.1415	7.35792
200	22	14.4317	0.102614	1.17846	101	0.75	0	8.05125	7.59094	6.7077	7.59603	6.58897	7.25749	8.04349	7.90289	7.28026
200	23	14.095	0.0939362	1.18445	101	0.75	0	7.2402	6.02578	5.88387	6.46445	6.85304	6.41093	6.40271	6.57212	6.34154
201	0	14.545	0.094136	1.17706	101	0.75	0	6.11965	5.77106	5.08083	5.98119	5.6409	5.907	5.9921	6.22574	4.42031
201	1	13.9967	0.0933431	1.18646	101	0.75	0	4.50385	4.73	4.49737	4.28653	4.90346	4.09392	5.17779	4.88471	4.17023
201	2	13.905	0.0864608	1.18806	101	0.75	0	4.03869	3.66475	3.58577	3.74652	3.68483	4.06371	4.1236	3.90972	3.0348
201	3	13.7367	0.083352	1.18967	101	0.75	0	3.84207	3.21162	2.9951	2.68618	2.73982	3.20504	3.00169	3.68394	3.65572
201	4	13.0542	0.0778132	1.201	101	0.75	0	3.15643	2.9671	3.20846	3.41684	2.75639	3.11817	2.74798	3.16993	2.63044
201	5	12.5325	0.0693407	1.2116	101	0.75	0	2.58287	2.37451	2.4599	2.11266	1.65099	2.20827	2.02442	1.73568	1.72422
201	6	12.3708	0.0641655	1.50891	101	0.75	0	2.30694	2.15833	1.80351	1.22587	1.14018	0.789638	1.87627	1.9187	1.61988
201	7	13.445	0.0931147	62.2455	101	0.75	0	1.29009	3.08648	3.82388	0.771551	0.96058	1.81904	0.681174	0.823983	0.745471
201	8	19.61	0.550656	272.269	101	0.75	0	7.36462	33.4755	54.9189	9.69695	19.5011	66.5007	30.4624	72.8181	112.536
201	9	23.9075	1.1547	783.085	101	0.75	0	17.877	39.3906	60.7	17.1975	27.5795	77.4897	40.5936	89.374	129.449
201	10	26.7617	1.75376	1531.39	101	0.75	0	24.2112	43.1676	59.7033	23.3925	32.3298	78.7006	44.6674	86.514	122
201	11	27.6625	1.93409	1692.26	101	0.75	0	26.8686	43.6144	60.6621	25.9266	33.4372	79.227	47.874	86.6449	124.293
201	12	28.5742	2.11555	1826.03	101	0.75	0	26.9644	44.6758	59.6809	26.3053	34.5854	79.9861	49.7439	87.1888	128.791
201	13	28.8425	2.18418	1863.39	101	0.75	0	26.8326	45.4131	61.1054	26.2744	34.5073	80.8936	50.6347	91.8542	126.921
201	14	28.905	2.24258	1708.52	101	0.75	0	27.1389	45.0832	62.2374	26.3613	34.2217	81.1894	49.7909	92.5085	119.881
201	15	28.2075	2.05945	1196.93	101	0.75	0	27.0231	45.3733	64.1119	26.1272	34.3002	82.2581	49.3806	88.9626	125.114
201	16	26.6642	1.71668	300.466	101	0.75	0	25.7201	36.7324	49.0183	24.8833	29.0367	49.5225	37.3794	56.9275	75.755
201	17	22.095	0.891336	12.4648	101	0.75	0	19.8834	19.3492	19.4118	19.5171	19.3619	21.0065	23.5316	21.1695	19.7389
201	18	18.3208	0.340091	1.23918	101	0.75	0	10.844	11.1035	10.3176	10.2247	10.6922	10.9761	12.7546	11.3778	11.524
201	19	16.7617	0.186442	1.12987	101	0.75	0	9.01894	7.98207	6.7185	7.99945	7.58149	7.94412	9.14062	7.95335	7.89604
201	20	16.0708	0.144982	1.1439	101	0.75	0	7.31276	6.36977	7.14288	7.27667	6.81085	6.61745	7.78899	7.66342	7.37058
201	21	15.5417	0.122701	1.15459	101	0.75	0	8.15028	7.49765	7.55034	7.94454	7.07834	7.8545	8.47825	8.1415	7.35792
201	22	15.2783	0.106242	1.16223	101	0.75	0	8.05125	7.59094	6.7077	7.59603	6.58897	7.25749	8.04349	7.90289	7.28026
201	23	15.1533	0.0951387	1.16518	101	0.75	0	7.2402	6.02578	5.88387	6.46445	6.85304	6.41093	6.40271	6.57212	6.34154
202	0	14.855	0.0875662	1.17051	101	0.75	0	6.11965	5.77106	5.08083	5.98119	5.6409	5.907	5.9921	6.22574	4.42031
202	1	14.3658	0.084817	1.17866	101	0.75	0	4.50385	4.73	4.49737	4.28653	4.90346	4.09392	5.17779	4.88471	4.17023
202	2	13.6358	0.0792883	1.19109	101	0.75	0	4.03869	3.66475	3.58577	3.74652	3.68483	4.06371	4.1236	3.90972	3.0348
202	3	13.1458	0.0767364	1.19836	101	0.75	0	3.84207	3.21162	2.9951	2.68618	2.73982	3.20504	3.00169	3.68394	3.65572
202	4	12.7442	0.0724953	1.20466	101	0.75	0	3.15643	2.9671	3.20846	3.41684	2.75639	3.11817	2.74798	3.16993	2.63044
202	5	12.8817	0.0660558	1.20262	101	0.75	0	2.58287	2.37451	2.4599	2.11266	1.65099	2.20827	2.02442	1.73568	1.72422
202	6	13.1767	0.0657252	1.37762	101	0.75	0	2.30694	2.15833	1.80351	1.22587	1.14018	0.789638	1.87627	1.9187	1.61988
202	7	13.9458	0.0706673	14.6308	101	0.75	0	1.29009	3.08648	3.82388	0.771551	0.96058	1.81904	0.681174	0.823983	0.745471
202	8	17.5417	0.227879	201.646	101	0.75	0	7.05079	33.2424	54.901	9.60823	19.5965	65.9492	30.0578	72.0355	112.693
202	9	22.2425	0.741739	576.432	101	0.75	0	15.379	39.0909	58.6219	14.4827	26.4158	77.6057	39.4568	85.2278	123.883
202	10	26.8417	1.57204	1372.39	101	0.75	0	22.6499	41.5177	59.6041	22.6071	31.068	78.6681	44.2224	82.2421	125.694
202	11	28.4325	1.81703	1344.41	101	0.75	0	23.6484	41.3665	59.1216	23.2488	32.7656	77.2348	46.0254	83.7214	126.553
202	12	27.2267	1.56109	814.349	101	0.75	0	24.2299	41.6617	62.0478	22.56	31.3842	80.1816	47.1941	83.1632	131.196
202	13	27.13	1.57078	740.117	101	0.75	0	24.2756	42.3181	60.7784	23.3758	32.2137	79.4904	49.6723	90.1517	127.938
202	14	27.3692	1.55054	866.941	101	0.75	0	24.0102	42.2435	59.8187	22.788	32.3823	79.6298	48.3395	89.8803	125.694
202	15	26.5658	1.38073	554.773	101	0.75	0	23.8396	41.8824	60.7594	22.8497	32.0646	79.1958	46.958	90.4225	121.487
202	16	23.0625	0.682976	65.285	101	0.75	0	19.7821	32.4142	43.8952	19.7937	24.1556	44.3268	31.808	49.4475	74.7164
202	17	22.1708	0.458406	14.6577	101	0.75	0	9.60354	8.8981	9.8376	8.82716	9.86674	9.89748	13.9579	10.6682	10.3711
202	18	20.0775	0.246307	1.21393	101	0.75	0	6.11675	5.62309	6.18317	6.61155	5.83531	4.69711	6.94475	5.1028	5.43264
202	19	19.0258	0.18207	1.09321	101	0.75	0	4.47114	4.41779	4.881	4.64516	4.78435	3.78544	5.86717	4.73162	3.36094
202	20	18.54	0.160411	1.10324	101	0.75	0	5.90721	5.47074	5.38652	4.56372	5.00757	4.64264	5.89488	5.42266	4.55658
202	21	18.23	0.14761	1.10866	101	0.75	0	4.84985	4.9878	4.70314	4.50334	4.22777	3.3077	3.97394	4.28917	4.47333
202	22	18.2442	0.135866	1.10866	101	0.75	0	4.02649	4.66041	3.23046	3.08417	2.71973	2.64256	3.9951	2.92647	2.47433
202	23	18.3875	0.144344	1.10548	101	0.75	0	3.94231	4.37548	4.45192	4.07725	3.9477	3.25399	4.72109	4.15803	5.24563
203	0	18.1617	0.136651	1.10885	101	0.75	0	3.8955	4.82018	3.94722	3.52632	2.85631	2.37833	2.34669	3.25375	2.47946
203	1	17.8225	0.12779	1.11543	101	0.75	0	4.60108	4.56294	4.79231	3.82929	3.85265	3.41363	4.36022	3.97957	4.05284
203	2	17.3158	0.114651	1.12395	101	0.75	0	5.13906	3.57136	2.88872	3.14524	2.81961	3.67201	4.12841	4.17856	3.9981
203	3	17.0692	0.10511	1.12948	101	0.75	0	4.73387	3.90194	4.10852	3.98965	3.54762	4.08973	4.3285	4.85934	2.59777
203	4	17.8233	0.113062	1.11563	101	0.75	0	4.18434	4.36764	3.33839	4.10264	4.68015	3.31581	3.60335	3.38546	2.4481
203	5	18.3592	0.119645	1.10641	101	0.75	0	3.99918	4.01801	4.46444	3.50336	4.121	3.83496	3.08252	4.29259	3.43478
203	6	18.5175	0.108487	1.18142	101	0.75	0	4.55997	4.62269	4.126	3.43836	2.04385	3.15466	2.57591	2.95441	3.76006
203	7	19.2542	0.107056	27.0299	101	0.75	0	16.198	16.442	16.0357	13.0726	12.5301	13.9737	12.0068	13.3303	15.6597
203	8	20.1608	0.167872	76.2492	101	0.75	0	14.3537	34.6328	55.7701	14.3418	23.6363	69.6565	33.0306	72.9521	113.518
203	9	21.2417	0.33618	249.663	101	0.75	0	16.9459	35.8919	56.988	16.4506	26.309	79.4694	37.4016	88.0723	134.338
203	10	23.185	0.650475	453.761	101	0.75	0	18.5392	20.4116	21.749	17.5631	17.942	24.3622	20.7882	28.0711	51.8878
203	11	23.6867	0.746862	462.749	101	0.75	0	18.5316	29.7654	36.7654	18.7018	21.9321	43.5475	26.7991	49.7419	84.511
203	12	23.7117	0.760226	374.028	101	0.75	0	18.6956	38.3026	55.2723	19.3284	27.3694	72.6284	38.6804	78.7306	125.856
203	13	23.4717	0.719686	329.656	101	0.75	0	21.1263	40.3036	61.4262	19.2646	29.5777	76.8886	42.4908	84.3828	124.09
203	14	23.375	0.764626	312.133	101	0.75	0	22.4886	41.4371	55.6347	19.563	31.4453	87.0448	46.19	93.522	129.286
203	15	24.6367	1.12081	401.973	101	0.75	0	25.2329	44.48	63.1964	24.1156	34.1193	83.6266	50.1959	91.1846	122.272
203	16	22.8375	0.905732	55.0147	101	0.75	0	24.12	36.3228	50.184	24.1854	28.2705	48.5458	36.794	54.195	74.7978
203	17	22.0008	0.715104	21.9557	101	0.75	0	18.9655	18.4512	17.856	17.4075	17.5077	17.7152	21.9606	18.3472	17.2272
203	18	19.2333	0.283143	1.22405	101	0.75	0	7.80719	7.38315	7.70015	9.26379	9.31454	9.13035	10.7748	9.11991	8.69245
203	19	17.8275	0.15867	1.11431	101	0.75	0	5.83891	5.42011	5.60857	5.79011	5.53892	4.79122	7.54606	6.17443	5.07269
203	20	17.5483	0.13146	1.12016	101	0.75	0	5.46664	5.44925	5.27385	5.52718	5.02491	5.13764	6.21943	4.78208	5.42198
203	21	19.4442	0.309584	1.0979	101	0.75	0	18.0103	15.6005	17.0023	16.0169	14.7894	17.0087	16.8987	18.0385	16.3736
203	22	20.5125	0.386537	1.0776	101	0.75	0	16.2472	16.5675	15.6576	18.6099	13.8766	13.1187	13.0382	15.1195	13.6704
203	23	20.3075	0.325971	1.07742	101	0.75	0	13.4198	13.9433	14.1175	13.6168	14.2065	16.1153	15.2149	14.3044	11.2425
204	0	20.3608	0.337463	1.07852	101	0.75	0	20.6929	19.7756	19.873	19.8355	19.2805	20.7249	20.2826	20.9472	19.9609
204	1	20.1508	0.292746	1.08382	101	0.75	0	19.5311	18.2775	17.1083	16.0598	15.5236	17.182	17.8643	18.0667	17.9849
204	2	18.9175	0.128922	1.10045	101	0.75	0	7.17646	7.98373	6.8259	7.65517	7.56547	6.17659	6.42278	8.07992	6.63541
204	3	18.4708	0.101795	1.10885	101	0.75	0	3.22926	3.60741	2.85736	3.70322	2.62536	3.31515	2.96444	3.79427	1.97361
204	4	18.6442	0.0949588	1.10623	101	0.75	0	4.68121	3.48201	3.14914	2.29911	1.41512	2.43005	2.27597	2.7081	3.66119
204	5	19.4958	0.153591	1.0971	101	0.75	0	12.2266	15.8091	14.2466	13.0222	11.0475	9.60249	12.4017	11.8969	8.26312
204	6	19.3558	0.118629	1.25776	101	0.75	0	2.79812	2.85382	3.23988	2.80915	3.26957	3.40202	3.721	2.99803	2.50386
204	7	19.9158	0.124552	40.787	101	0.75	0	6.56158	8.78669	8.10941	5.21299	5.52333	5.03965	3.59055	3.54453	4.09429
204	8	21.8483	0.413705	159.128	101	0.75	0	16.2589	36.1947	57.3186	16.1072	25.9198	69.4106	35.7027	78.7347	110.024
204	9	22.6075	0.472428	582.867	101	0.75	0	17.1436	36.4936	60.1059	18.0796	26.9694	77.8266	39.7315	84.5102	122.575
204	10	25.6233	0.97428	875.36	101	0.75	0	20.7051	39.8835	60.1618	21.2745	29.9056	79.9097	42.4916	83.9406	112.619
204	11	26.2667	1.05738	1271.28	101	0.75	0	21.7806	40.5508	59.2319	21.1667	30.3432	77.719	43.9736	86.615	116.541
204	12	27.3183	1.29575	1188.09	101	0.75	0	21.6116	40.9084	60.9444	21.2392	31.1792	76.0384	46.3672	91.1675	117.482
204	13	28.0175	1.53418	1281.7	101	0.75	0	22.231	41.6293	61.8468	21.5343	31.2994	81.0219	48.7727	91.0606	121.121
204	14	27.7658	1.58842	830.541	101	0.75	0	21.8865	41.2954	61.09	22.2113	31.5193	79.179	46.9004	91.6515	121.845
204	15	26.355	1.27001	395.099	101	0.75	0	22.044	40.4346	62.5138	21.3121	31.1382	80.3434	47.4871	91.6387	123.326
204	16	25.6458	1.11662	226.687	101	0.75	0	19.7674	31.3566	45.7179	18.7054	23.7525	42.5613	31.7826	52.0124	74.5597
204	17	24.0367	0.746637	26.6488	101	0.75	0	11.8071	11.3595	11.1234	8.83849	8.69607	10.5872	14.2002	11.9354	11.2065
204	18	21.3125	0.27474	1.21539	101	0.75	0	3.96343	4.55281	3.44019	3.86884	3.21234	3.8432	6.58753	4.65379	4.01766
204	19	19.8633	0.171137	1.08036	101	0.75	0	1.80657	2.55237	2.25986	2.01575	1.73983	2.26368	3.06608	2.45152	1.45567
204	20	19.265	0.136361	1.0932	101	0.75	0	1.84286	3.63213	2.37788	2.29281	2.31438	2.26458	2.60354	1.87337	1.47791
204	21	18.6317	0.123704	1.10287	101	0.75	0	1.95485	2.05287	1.59321	2.31974	1.85902	2.16065	2.16857	1.60654	2.85418
204	22	18.0042	0.105698	1.1143	101	0.75	0	2.34844	2.572	1.48131	2.0782	1.54022	1.51358	2.24891	1.39871	1.27025
204	23	17.6633	0.100001	1.12092	101	0.75	0	1.68414	1.47833	0.923327	1.51551	1.21762	1.26043	1.9847	1.37476	1.21962
205	0	17.6075	0.0918449	1.12168	101	0.75	0	2.57288	2.69895	1.58853	1.30904	1.36048	1.23477	1.75027	1.22082	0.732471
205	1	18.155	0.0978686	1.11091	101	0.75	0	2.45296	2.59032	1.62364	1.44254	1.63707	1.34659	1.17951	1.64417	1.71053
205	2	17.5008	0.0975664	1.1215	101	0.75	0	2.069	1.97467	1.6213	1.54376	1.23826	1.56499	2.11704	1.71601	2.31982
205	3	16.8825	0.0847435	1.13331	101	0.75	0	2.27201	1.81816	2.56307	2.46378	1.96511	1.83651	2.77027	1.8118	1.61851
205	4	16.8358	0.0788368	1.13522	101	0.75	0	2.16164	2.94836	2.84611	2.82262	2.77243	2.269	2.89096	1.91614	2.23566
205	5	16.9808	0.0763259	1.13465	101	0.75	0	6.2374	5.89714	4.04265	3.69289	4.82148	4.51137	5.38717	4.71879	4.14355
205	6	17.5933	0.090834	1.36029	101	0.75	0	10.4426	8.63727	7.97563	7.08776	4.09479	5.9215	5.89233	6.69613	4.9728
205	7	20.0258	0.288874	59.2181	101	0.75	0	16.3876	17.0162	17.828	16.1302	15.5172	16.2436	15.9293	16.6418	15.5497
205	8	22.4575	0.624634	282.144	101	0.75	0	16.419	36.5894	53.8925	15.5716	26.2076	66.7721	35.5202	74.0833	107.679
205	9	24.0975	0.877283	727.828	101	0.75	0	19.013	30.9018	42.2593	19.5777	25.8677	61.312	34.7782	69.2391	100.323
205	10	24.8225	0.98683	704.795	101	0.75	0	20.5599	19.0417	20.4886	20.5059	18.7421	19.4236	19.5584	20.1598	19.5477
205	11	24.61	0.971888	774.465	101	0.75	0	19.744	34.094	45.3461	20.27	25.8106	53.5404	37.0812	71.7291	100.161
205	12	26.2858	1.30159	885.371	101	0.75	0	21.9305	40.3651	59.2777	21.2211	30.873	78.3646	44.0118	80.6904	111.413
205	13	27.495	1.52724	1146.24	101	0.75	0	21.8229	40.1711	60.3399	21.7629	30.7601	79.894	43.7506	81.2161	111.935
205	14	26.8917	1.4304	644.494	101	0.75	0	20.8756	40.1634	60.3318	21.1428	31.2526	78.0468	44.82	87.7091	117.87
205	15	27.3025	1.53855	879.748	101	0.75	0	21.6574	40.2689	59.8245	21.0772	31.371	77.7287	46.5451	89.6397	118.042
205	16	26.9508	1.51629	372.301	101	0.75	0	20.6261	32.2248	43.9913	20.737	24.4884	44.0151	31.7349	49.7121	67.1027
205	17	23.255	0.908894	23.1673	101	0.75	0	18.773	17.9734	17.1265	17.5436	16.9704	17.2408	20.2431	17.5438	17.728
205	18	20.69	0.506547	1.29085	101	0.75	0	15.7123	14.5276	15.3861	15.4678	14.0651	13.4805	15.2787	12.4825	11.5833
205	19	20.5575	0.548567	1.0787	101	0.75	0	17.7701	17.5212	17.7698	16.9319	16.7967	16.5309	17.5478	17.6003	16.253
205	20	20.2467	0.538705	1.08345	101	0.75	0	20.2592	19.4196	19.3473	19.5209	19.1241	18.9784	19.9008	19.9961	19.256
205	21	20.3067	0.492271	1.08327	101	0.75	0	20.284	20.437	20.1203	21.1984	19.8155	20.3572	20.8448	20.7744	19.5494
205	22	19.59	0.415656	1.09248	101	0.75	0	17.357	16.9265	15.9241	15.1727	14.1572	15.569	16.0704	15.1651	14.5137
205	23	19.1125	0.396683	1.10455	101	0.75	0	19.0255	17.7172	17.2678	17.2191	16.0656	16.6616	15.8491	17.3956	16.676
206	0	18.4725	0.319962	1.10923	101	0.75	0	12.3791	11.3431	10.712	9.65939	9.44361	11.1394	11.0003	11.6107	10.6194
206	1	18.7767	0.299002	1.10251	101	0.75	0	11.7249	12.2068	11.5298	13.3846	11.4148	10.2018	12.1619	11.6894	11.5186
206	2	19.5417	0.446969	1.09137	101	0.75	0	17.4516	14.1511	14.1612	17.1951	14.7735	15.9307	13.9049	15.1947	15.2925
206	3	18.6833	0.226297	1.10044	101	0.75	0	9.66124	9.0314	11.3152	9.00253	8.45691	9.6355	7.82233	7.77973	7.17878
206	4	18.3042	0.178142	1.10904	101	0.75	0	11.7914	10.7917	11.603	11.6927	13.151	13.2047	12.0642	12.3108	11.2136
206	5	18.6917	0.171591	1.10137	101	0.75	0	7.59446	7.65576	8.51391	6.60471	7.68598	9.07149	7.7599	7.7421	7.06731
206	6	18.4408	0.110741	1.41274	101	0.75	0	3.76909	3.93507	3.81112	3.52044	2.93597	3.6531	3.57114	2.87288	2.69955
206	7	18.9308	0.131209	38.9128	101	0.75	0	5.33456	8.24308	6.9458	4.34106	5.3522	4.22495	3.61655	2.77424	3.95511
206	8	23.7567	0.845695	353.627	101	0.75	0	17.9942	38.7831	55.7718	18.1979	27.1016	69.9133	36.0645	73.0567	99.4208
206	9	26.2258	1.27659	785.931	101	0.75	0	22.4332	40.4686	57.1863	21.7214	30.3181	76.6846	42.1948	81.0233	112.324
206	10	27.2567	1.43477	1105.56	101	0.75	0	22.9547	40.9714	57.9831	23.1577	31.7024	78.6387	43.2215	84.7001	112.186
206	11	27.6725	1.51248	1150.18	101	0.75	0	22.2126	41.247	60.0489	22.6106	31.3559	76.4178	44.6582	83.9278	113.241
206	12	27.7108	1.55977	1225.71	101	0.75	0	21.9709	41.5218	58.1661	22.1333	31.1734	76.7208	45.3538	86.3216	111.964
206	13	28.715	1.78601	1115.67	101	0.75	0	23.0361	40.7197	58.0554	22.4377	30.516	77.3133	45.2264	84.0005	114.956
206	14	28.9275	1.90501	1206.32	101	0.75	0	22.1098	39.8626	58.8838	22.5526	31.1381	76.1214	44.5533	85.882	115.844
206	15	29.3975	1.96887	1136.15	101	0.75	0	21.927	41.0928	58.4641	20.702	30.6282	76.1677	45.3604	87.3881	111.605
206	16	27.1717	1.48803	311.493	101	0.75	0	20.2291	31.4863	43.4932	20.5206	24.4013	44.2892	32.9746	51.8867	66.5385
206	17	23.8467	0.861057	24.4683	101	0.75	0	18.5931	17.4328	17.6197	17.8775	17.3105	18.4602	21.9408	18.6688	18.4426
206	18	21.9533	0.61528	1.28865	101	0.75	0	18.1975	17.2804	17.122	18.3388	17.7926	16.8841	19.9662	17.5398	17.5275
206	19	20.0617	0.376469	1.08092	101	0.75	0	14.5657	14.4566	14.0003	13.9484	11.8805	12.8595	14.6602	12.9625	13.929
206	20	20.6808	0.448353	1.08071	101	0.75	0	19.829	18.6533	17.5593	18.4849	16.9418	17.289	18.0529	17.0635	18.4071
206	21	18.9708	0.233357	1.09861	101	0.75	0	11.0092	9.89296	9.55172	9.94782	9.69871	8.86198	10.4613	9.33372	9.55626
206	22	18.9283	0.211938	1.10791	101	0.75	0	11.7711	10.2094	10.3201	10.7238	12.2725	11.0963	10.5528	9.41753	9.89562
206	23	18.0475	0.164599	1.1162	101	0.75	0	5.84561	5.08721	4.13799	4.4385	4.56475	4.56048	5.22176	4.79576	3.81308
207	0	17.0758	0.11312	1.13101	101	0.75	0	2.67596	2.61327	2.30622	2.57156	2.69685	2.2735	2.13024	2.18725	2.041
207	1	16.8433	0.100986	1.13561	101	0.75	0	3.63042	3.64809	2.90436	3.03602	3.10893	2.72961	2.84863	3.91571	2.77583
207	2	16.7192	0.0987182	1.13753	101	0.75	0	3.37771	3.22181	3.31938	3.82326	2.93902	3.31069	3.59214	3.50348	2.72281
207	3	17.3292	0.0984429	1.12606	101	0.75	0	3.73773	3.44566	3.47611	3.46929	3.10614	2.98691	3.14372	2.82185	2.60034
207	4	17.4158	0.105152	1.12396	101	0.75	0	3.47521	3.42871	2.95675	3.81846	3.16298	3.62614	2.94598	2.94671	3.60269
207	5	16.5158	0.0944331	1.13985	101	0.75	0	2.54587	3.43069	2.80245	3.31163	3.63856	2.97467	3.37082	2.72862	2.69236
207	6	16.9042	0.0830074	1.41464	101	0.75	0	4.61612	4.05634	4.95471	3.33935	4.41152	4.2056	5.28357	3.80709	4.19487
207	7	20.5892	0.545693	80.8734	101	0.75	0	20.5106	20.975	20.9827	18.1693	17.3407	18.265	17.4196	17.3363	19.3314
207	8	23.2625	0.891797	283.282	101	0.75	0	18.4959	39.0502	60.231	17.8753	28.2292	72.1241	37.9388	74.2788	108.698
207	9	26.2625	1.39522	850.3	101	0.75	0	22.5349	40.1222	56.8037	21.7686	30.0489	77.9981	41.3358	84.996	111.461
207	10	28.1108	1.71352	1418.9	101	0.75	0	23.5112	41.1629	58.9409	23.1427	31.5781	78.8865	44.2501	83.4694	106.872
207	11	28.925	1.90054	1330.93	101	0.75	0	23.6813	41.711	60.0097	23.0224	32.3978	79.4062	46.4351	80.9429	115.303
207	12	30.8492	2.31986	1814.09	101	0.75	0	22.9406	41.677	59.5779	22.5951	32.1413	76.6531	46.6556	85.3501	121.813
207	13	30.8317	2.319	1797.63	101	0.75	0	23.0188	41.3261	59.5458	21.4612	31.9145	77.7977	46.2856	88.7976	117.334
207	14	31.415	2.45693	1880.98	101	0.75	0	21.7261	41.1318	59.1897	18.8911	31.7486	78.9171	46.6801	89.4193	114.949
207	15	30.7058	2.28157	1302.05	101	0.75	0	22.3994	41.5984	60.0548	21.3651	30.662	79.8309	46.9753	91.0948	116.33
207	16	28.9108	1.82944	382.659	101	0.75	0	21.0405	33.0054	46.6176	20.7549	25.2003	44.6833	33.7329	53.5792	70.5198
207	17	23.7808	0.848107	14.5814	101	0.75	0	13.9233	14.6018	14.1916	13.9285	13.1401	13.9532	16.5494	14.8415	14.0121
207	18	20.29	0.312176	1.32331	101	0.75	0	6.96823	7.3512	6.20562	6.34668	5.74551	6.37843	8.04824	5.80325	5.98165
207	19	19.2108	0.207467	1.09155	101	0.75	0	6.08319	5.52567	5.20192	5.77437	5.55016	4.68247	6.71112	5.3226	4.50173
207	20	18.9475	0.171292	1.09784	101	0.75	0	5.28087	5.38775	5.27097	6.75733	4.90366	5.09177	6.18706	5.07372	4.38986
207	21	19.305	0.205917	1.0958	101	0.75	0	8.97114	9.04026	9.50419	9.25848	7.73776	8.05638	9.17438	9.24905	8.57648
207	22	19.7125	0.288662	1.09359	101	0.75	0	10.7304	9.74768	8.80189	9.7638	9.60395	9.60402	11.4292	10.6106	10.4751
207	23	18.1058	0.140112	1.11204	101	0.75	0	3.23781	3.73888	3.5286	3.7806	3.53141	3.37524	3.29644	3.07928	2.85554
208	0	17.7433	0.114935	1.11921	101	0.75	0	2.37581	2.92007	2.07881	2.49068	1.78027	1.77966	2.34371	2.51396	2.77994
208	1	17.5742	0.100378	1.12319	101	0.75	0	2.74834	2.28002	2.47502	2.71031	2.00948	2.59737	2.68451	1.90245	1.98216
208	2	17.175	0.0956482	1.12986	101	0.75	0	2.9094	2.88245	2.0934	2.66629	3.04833	2.505	3.88105	3.18789	2.34718
208	3	16.7733	0.0895278	1.13638	101	0.75	0	3.34801	2.85687	3.47503	3.47591	3.02081	2.0288	3.33756	3.44789	3.02694
208	4	16.22	0.0858152	1.14525	101	0.75	0	1.55113	2.32928	1.59566	1.69923	1.39075	1.0307	1.6171	1.32345	1.75552
208	5	15.6558	0.0800208	1.15381	101	0.75	0	0.115821	0.100426	0.495702	0.204797	0.257252	0.347639	0.287141	-0.292689	-0.00218875
208	6	15.3975	0.0740098	1.57371	101	0.75	0	0.765136	0.297974	0.133391	0.329063	0.0959549	-0.191169	0.0511218	0.165725	-0.135323
208	7	16.2725	0.112353	66.4855	101	0.75	0	0.964919	3.0676	3.09076	0.157473	0.862424	1.22194	0.954776	0.294013	0.0280301
208	8	21.8425	0.585766	303.529	101	0.75	0	9.14524	33.8922	52.666	8.30653	18.0741	66.9126	30.1665	71.932	105.608
208	9	25.5592	1.21297	926.346	101	0.75	0	14.3773	36.6375	58.0277	14.4583	27.0144	75.3171	38.9107	83.068	120.749
208	10	28.7267	2.05672	1666.28	101	0.75	0	20.3511	41.1384	61.9757	19.5587	30.5657	80.2403	43.805	89.2845	124.146
208	11	30.1092	2.3103	1900.86	101	0.75	0	22.7589	44.595	62.3512	22.027	34.0201	83.3524	48.2498	93.6936	125.19
208	12	30.405	2.22791	1993.49	101	0.75	0	23.2615	44.6286	62.5871	22.5609	34.1561	85.3013	50.6861	89.9527	127.634
208	13	30.5658	2.37792	2006.63	101	0.75	0	22.4057	42.1458	63.3021	22.6872	32.1592	82.0632	48.8319	89.179	119.589
208	14	30.9783	2.50576	1876.46	101	0.75	0	21.526	41.7157	60.818	21.4717	33.3129	82.1601	46.6882	86.3909	118.102
208	15	30.075	2.28195	1313.37	101	0.75	0	21.7765	41.3526	62.9848	22.093	31.9367	82.2767	46.9357	89.3272	128.077
208	16	28.2858	1.77061	347.895	101	0.75	0	20.8911	32.8198	48.743	21.2256	26.3597	46.6407	33.2615	52.2579	74.4334
208	17	21.955	0.617954	14.7114	101	0.75	0	10.9075	10.9454	12.2783	11.186	10.9226	11.254	14.1696	10.8045	11.9605
208	18	19.1117	0.315164	1.35222	101	0.75	0	9.47218	9.50668	8.22857	9.6482	8.41029	9.10855	10.2548	7.94394	7.75806
208	19	17.7617	0.198755	1.11187	101	0.75	0	6.57101	6.54622	7.03772	6.92604	6.62192	6.67049	7.92668	7.28825	6.22175
208	20	17.015	0.158391	1.12719	101	0.75	0	6.61017	6.39732	5.97209	6.73888	6.25967	6.14263	6.38699	6.06467	4.8907
208	21	16.3767	0.143407	1.13869	101	0.75	0	6.15719	6.58664	5.55057	5.98662	5.70799	7.03239	6.81878	5.95235	6.37627
208	22	16.0208	0.122454	1.14661	101	0.75	0	5.24762	5.47377	5.3826	4.50265	4.99355	5.07552	5.60551	5.05205	5.48224
208	23	15.73	0.108032	1.15166	101	0.75	0	4.08005	5.0399	4.42576	4.88701	3.71831	4.23437	5.23886	4.89526	4.99789
209	0	15.18	0.101291	1.16066	101	0.75	0	4.70836	3.27848	3.69291	4.09922	3.77431	3.4753	3.79008	3.91229	3.05305
209	1	14.6183	0.0924258	1.17071	101	0.75	0	3.85064	3.66409	3.42288	4.54932	3.38421	3.31431	4.21079	3.53826	3.15055
209	2	14.1383	0.0896951	1.17866	101	0.75	0	4.82532	4.85078	3.40357	4.68301	4.00115	3.9622	5.60693	5.40784	4.2484
209	3	13.6133	0.090629	1.18726	101	0.75	0	6.90996	7.35265	6.32082	6.5831	6.33778	7.0462	7.42401	6.13651	6.13908
209	4	13.2517	0.0873942	1.1933	101	0.75	0	6.69571	6.17732	6.63121	7.27357	6.39757	5.99442	6.03352	6.74687	6.41909
209	5	13.0258	0.0780813	1.19836	101	0.75	0	6.62946	5.76314	4.83749	5.54033	5.45369	4.69633	5.64733	5.37135	5.23211
209	6	13.02	0.0736995	1.63427	101	0.75	0	5.51053	5.60395	4.64222	5.14367	4.96897	4.96704	6.18274	6.06324	5.39529
209	7	14.07	0.111859	63.1498	101	0.75	0	3.97702	5.37435	5.82247	3.07753	3.18275	2.65714	3.87036	3.45046	2.96194
209	8	20.2117	0.593826	295.915	101	0.75	0	8.21843	22.0666	37.5914	5.54068	15.1614	4.29673	32.442	66.7201	104.078
209	9	24.6333	1.23727	870.932	101	0.75	0	7.75943	9.52379	9.85531	9.77464	9.95941	9.46454	9.73237	9.38088	7.80603
209	10	28.4883	2.24147	1649.87	101	0.75	0	14.9044	16.1202	18.0288	17.5273	17.5127	16.8628	17.9856	16.5753	15.1264
209	11	30.0358	2.6047	1881.65	101	0.75	0	21.8626	22.2132	22.1222	22.7696	22.3359	22.3132	24.325	22.4495	22.4671
209	12	31.1133	2.83695	1985.08	101	0.75	0	23.7841	22.6485	23.0769	22.4392	21.4862	22.9493	24.0901	23.6822	22.8438
209	13	31.4	2.8649	2000.88	101	0.75	0	23.2283	22.0338	22.0584	21.2683	21.3743	21.8201	22.6936	22.6277	23.4226
209	14	31.7483	3.05526	1881.99	101	0.75	0	22.5992	21.3719	21.9168	22.4967	20.9989	21.6239	21.5369	22.2942	23.0644
209	15	31.0142	2.96681	1307.89	101	0.75	0	22.5724	21.3691	21.8021	22.2328	21.6875	21.2333	21.4043	20.9959	21.4665
209	16	29.3142	2.65873	390.186	101	0.75	0	21.1551	19.9982	20.88	20.4156	19.8563	20.8114	21.5844	21.1327	19.8993
209	17	23.3275	1.4638	14.3078	101	0.75	0	15.08	14.5196	15.1555	16.0614	15.3108	15.5908	15.0364	15.1178	14.6279
209	18	18.9158	0.741647	1.29222	101	0.75	0	14.1292	13.4737	11.4828	12.419	10.5572	10.7262	12.0822	11.6207	13.1483
209	19	16.8033	0.472037	1.12514	101	0.75	0	10.8834	10.6059	10.7582	11.3611	10.7051	10.5962	10.3025	11.3538	11.1881
209	20	15.505	0.337582	1.14972	101	0.75	0	9.28596	9.26416	10.4754	10.5102	9.90381	10.3015	10.3178	11.1041	10.6185
209	21	15.1275	0.306012	1.1587	101	0.75	0	9.52084	10.5238	9.61006	9.8081	9.96966	10.0697	9.83654	10.9108	10.5566
209	22	14.845	0.272197	1.16498	101	0.75	0	9.99906	9.85124	9.73447	11.4281	9.4277	10.4772	9.46672	11.5539	10.6996
209	23	14.9008	0.213699	1.16755	101	0.75	0	10.5401	11.2405	10.545	9.79073	8.9816	10.7113	10.5791	10.4609	10.7307
210	0	14.8625	0.153041	1.16873	101	0.75	0	9.45926	9.01019	9.29037	8.52165	8.40878	7.89303	8.94082	8.81715	9.07082
210	1	14.6142	0.122258	1.17388	101	0.75	0	7.90334	7.82782	7.80467	7.71148	7.15958	7.25137	8.50986	7.75835	8.1037
210	2	14.3642	0.106296	1.17806	101	0.75	0	6.9433	7.19027	6.88793	7.02477	6.70462	6.59143	6.67581	7.22895	6.20436
210	3	13.9358	0.0939615	1.18425	101	0.75	0	5.5496	5.26314	5.18157	4.76918	4.93668	4.92536	5.28091	5.23194	4.9882
210	4	13.5442	0.0808472	1.19129	101	0.75	0	4.06425	4.15634	3.96631	4.6995	3.9079	4.49935	4.52335	4.40577	3.95437
210	5	13.0667	0.0734818	1.19937	101	0.75	0	3.73854	3.1726	2.94676	3.32451	2.99584	2.90256	3.54873	3.64118	3.44601
210	6	12.6517	0.0696581	1.66559	101	0.75	0	3.12069	2.8265	1.92514	2.63884	3.34376	2.60614	2.5826	3.44019	2.72452
210	7	13.5117	0.113652	67.2634	101	0.75	0	2.71143	3.06997	1.64804	1.79271	1.33509	1.81697	2.42668	2.71237	2.01535
210	8	19.4183	0.519532	288.441	101	0.75	0	5.57895	6.93377	5.86217	5.66802	3.90937	5.21862	4.00183	4.7128	4.12029
210	9	24.3925	1.25045	990.044	101	0.75	0	14.0812	12.3789	12.8253	11.5891	11.1509	13.7031	11.5162	12.8898	12.1678
210	10	27.8408	2.00194	1614.07	101	0.75	0	21.8192	20.3709	19.7472	20.6461	19.9808	21.2636	20.7685	20.1492	20.029
210	11	29.5467	2.25631	1859.41	101	0.75	0	25.3357	22.6472	22.8538	23.9761	22.3358	23.0526	22.8131	22.827	22.3282
210	12	29.7008	2.17868	1944.2	101	0.75	0	23.0358	24.0202	23.757	23.9652	22.3244	24.1652	23.4616	23.1956	31.7151
210	13	30.3192	2.26655	1746.72	101	0.75	0	25.6224	42.0593	58.4051	25.4792	32.7956	68.5462	39.9003	69.714	104.978
210	14	28.6308	1.94001	877.749	101	0.75	0	23.9835	30.5574	40.3128	23.6872	27.184	36.9198	27.8437	38.0881	59.5351
210	15	27.6333	1.80558	704.865	101	0.75	0	24.5971	45.6053	63.4964	22.8812	33.5995	76.4087	44.2782	82.6582	126.323
210	16	26.7142	1.68626	296.464	101	0.75	0	23.6959	36.8585	39.2859	22.7	27.507	52.2028	37.329	64.517	84.2304
210	17	22.6208	1.06417	30.106	101	0.75	0	19.0961	18.0421	19.081	18.5762	18.443	18.0413	19.8342	18.2033	19.3203
210	18	18.8333	0.459038	1.31793	101	0.75	0	11.0362	10.9994	10.8217	11.0461	9.61963	9.92327	12.2245	10.4521	10.0737
210	19	16.8908	0.236987	1.12112	101	0.75	0	9.21502	9.28021	9.16442	9.42304	8.22214	9.20287	9.51674	9.49877	8.2871
210	20	16.465	0.199957	1.13005	101	0.75	0	8.79525	8.61109	8.23929	8.33995	7.76341	8.11299	8.90296	8.20941	7.05107
210	21	15.4192	0.155749	1.14682	101	0.75	0	7.22661	7.52988	6.39378	6.81033	6.89431	6.89084	7.58089	7.80629	7.64468
210	22	14.4875	0.121124	1.16558	101	0.75	0	6.65832	6.63898	6.41907	6.43567	6.07189	5.76676	6.97295	6.54073	6.97526
210	23	13.7825	0.103782	1.18026	101	0.75	0	6.12779	5.96681	5.5061	6.25404	5.98198	5.44062	6.05754	6.30831	5.7365
211	0	13.12	0.0956237	1.1929	101	0.75	0	5.88389	6.01969	5.50097	5.67232	5.36224	5.20942	6.24413	5.44266	4.9733
211	1	12.535	0.0853932	1.20405	101	0.75	0	5.77199	5.99079	5.35788	6.71867	5.92835	5.07629	5.92669	5.15362	4.65487
211	2	11.9408	0.0861725	1.21407	101	0.75	0	6.04907	5.70337	5.81536	6.52139	6.06423	6.25653	6.47667	6.13064	6.1399
211	3	11.2758	0.0878343	1.22666	101	0.75	0	6.97679	5.90601	6.02744	6.86272	5.97715	5.74253	6.79722	6.19205	6.37172
211	4	10.535	0.0850851	1.24022	101	0.75	0	7.49093	6.41321	6.39271	6.54043	6.56249	6.9758	6.74385	7.39125	6.79808
211	5	9.8775	0.0843643	1.25223	101	0.75	0	6.946	6.69495	6.83024	6.78841	6.7189	6.05127	6.91217	6.77141	6.97823
211	6	9.36417	0.0840886	1.77302	101	0.75	0	6.72408	6.54802	6.97951	7.08842	6.29725	6.06667	6.9173	7.55357	7.13586
211	7	10.3492	0.121888	62.2937	101	0.75	0	5.33381	7.48632	5.53334	5.33016	5.58082	5.05063	5.74766	5.91972	29.4477
211	8	16.8542	0.569304	262.835	101	0.75	0	9.98172	49.7732	25.5598	8.98429	29.9387	24.3924	51.2946	21.6332	204.766
211	9	22.4392	1.64588	887.547	101	0.75	0	15.6359	41.1084	60.3983	19.369	30.405	81.0993	42.5876	91.8357	123.597
211	10	25.56	2.24332	1466.91	101	0.75	0	18.5959	42.7715	60.6689	23.7805	33.0167	80.7313	44.8412	85.1171	115.202
211	11	27.0517	2.5047	1683.51	101	0.75	0	21.556	43.9729	60.3494	23.9246	34.2612	83.1172	47.0909	87.2039	117.233
211	12	28.0525	2.65181	1779.37	101	0.75	0	24.5766	46.1	63.6108	25.3299	34.9133	84.7308	51.3764	89.2829	123.273
211	13	29.0308	2.74137	1830.26	101	0.75	0	25.1814	44.6024	66.2155	25.1192	35.3864	82.9776	52.0345	95.4522	121.326
211	14	29.0992	2.63112	1691.72	101	0.75	0	24.6869	42.9229	62.0053	23.8945	34.5578	80.5085	50.2063	92.5016	121.645
211	15	28.3233	2.47446	1082.08	101	0.75	0	23.4985	42.5233	63.3898	23.3063	34.3434	84.5162	49.1109	94.0675	128.512
211	16	25.8608	2.00599	312.889	101	0.75	0	22.2344	36.1102	37.6943	21.8439	25.9355	49.7024	37.9865	60.6268	77.067
211	17	19.9092	0.934936	30.1597	101	0.75	0	11.8198	11.1049	11.771	12.1938	10.5518	11.8285	16.5553	11.4376	12.5484
211	18	15.015	0.33601	1.45333	101	0.75	0	8.47149	7.59154	8.2528	8.47856	7.73479	7.43335	11.2435	8.38091	7.70033
211	19	13.1358	0.215085	1.18307	101	0.75	0	8.19304	7.70988	8.08024	8.62229	8.52191	8.0115	10.3366	8.84636	8.72222
211	20	12.2017	0.17215	1.20263	101	0.75	0	8.84915	8.17522	8.7577	9.67992	8.97962	9.44661	10.3126	9.37565	9.25697
211	21	11.535	0.140989	1.21695	101	0.75	0	9.51193	8.8759	8.37608	9.20021	8.31778	8.70853	9.74338	9.13102	8.53649
211	22	10.92	0.120059	1.22874	101	0.75	0	8.39821	7.31048	6.92614	8.08875	6.59284	7.55309	8.6904	7.89825	7.62822
211	23	10.4442	0.103298	1.23791	101	0.75	0	7.21581	6.49878	6.85711	8.02487	6.86204	6.23429	7.31687	7.47359	6.94051
212	0	10.2108	0.0917146	1.24357	101	0.75	0	6.72093	6.68647	6.08967	6.82014	6.58618	6.04699	7.05003	6.79254	7.0615
212	1	10.0283	0.0807186	1.24842	101	0.75	0	6.29268	6.39229	6.45913	6.22034	5.86181	6.18982	6.7093	6.28574	5.1921
212	2	9.95583	0.0727728	1.25053	101	0.75	0	5.98371	6.23811	5.32072	6.06423	5.40354	5.77588	6.74522	5.91878	5.6886
212	3	9.98917	0.0664109	1.25011	101	0.75	0	6.6517	5.73977	6.19626	6.64882	5.95866	6.23943	6.37165	6.48525	5.98677
212	4	10.2592	0.0579051	1.24652	101	0.75	0	6.99929	6.73315	6.25665	6.7718	6.80237	7.10066	7.93094	7.56222	6.85894
212	5	10.6192	0.057282	1.23875	101	0.75	0	8.0291	7.48943	7.91409	7.78275	7.96351	7.5146	8.05307	7.88804	7.85256
212	6	10.8683	0.0546535	1.7482	101	0.75	0	6.73146	7.30198	6.60795	6.10164	5.96331	6.23943	7.10306	7.68754	7.78963
212	7	12.5275	0.107978	71.8298	101	0.75	0	6.4585	8.22286	8.27201	6.42943	7.01661	6.80475	7.38563	22.0704	22.1775
212	8	20.04	0.768215	282.118	101	0.75	0	17.8517	45.0203	63.5488	16.4926	30.0182	27.5993	40.1899	116.802	155.9
212	9	24.585	1.49612	996.767	101	0.75	0	23.7528	42.8037	60.8747	23.3738	33.612	78.8023	44.8589	86.2198	117.907
212	10	27.2058	1.98112	1580.57	101	0.75	0	26.4443	43.5086	63.1149	25.8472	35.3973	84.2168	46.3214	88.8592	117.668
212	11	28.5808	2.30554	1797.59	101	0.75	0	28.4235	45.5365	63.2951	28.5228	37.5457	84.6299	49.8946	92.8328	110.452
212	12	29.1308	2.45141	1879.85	101	0.75	0	28.9752	45.6878	63.0325	28.7224	38.525	82.5012	51.4625	93.0861	118.528
212	13	29.9242	2.6676	1903.48	101	0.75	0	26.9571	45.6415	62.1881	26.5782	37.5925	82.8305	51.4734	90.4612	113.252
212	14	29.9667	2.53408	1799.97	101	0.75	0	28.2193	45.6791	65.9318	27.9685	37.224	82.8331	51.5692	93.8321	115.035
212	15	28.6167	2.18171	1248.25	101	0.75	0	28.8113	47.8718	66.8615	29.0733	38.8152	84.1467	52.9441	93.1504	115.862
212	16	26.7958	1.7615	389.923	101	0.75	0	27.5185	39.2994	41.1876	26.8329	31.0205	54.2446	41.872	61.8129	80.9318
212	17	22.8267	1.15786	18.0531	101	0.75	0	24.9619	23.5022	24.2517	26.0683	24.294	24.552	27.5894	24.919	24.9016
212	18	20.265	0.754482	1.38991	101	0.75	0	18.664	17.6352	18.0152	18.8218	17.9979	18.2617	21.5735	19.6698	18.7252
212	19	16.87	0.316747	1.12286	101	0.75	0	12.1346	11.7717	11.7499	12.6816	11.7668	11.2948	13.734	13.374	13.5068
212	20	15.6875	0.194245	1.14662	101	0.75	0	10.9465	10.449	10.5042	11.5902	10.5083	10.5687	12.4347	11.4598	10.6248
212	21	15.1517	0.145241	1.15674	101	0.75	0	11.723	10.8343	10.9901	11.2362	10.7019	11.7421	12.1785	11.421	10.9024
212	22	15.0008	0.118994	1.16105	101	0.75	0	10.6301	10.7172	9.51409	10.5338	9.9303	10.1103	11.1487	10.9102	10.0739
212	23	14.8358	0.102942	1.1636	101	0.75	0	9.38841	9.66372	8.78289	9.4034	8.69958	8.88044	10.5555	10.042	9.11149
213	0	14.6658	0.0931923	1.16695	101	0.75	0	7.05052	7.68576	7.47852	7.55066	7.14382	8.46992	7.90973	7.93844	7.30322
213	1	14.7092	0.0818616	1.16715	101	0.75	0	7.3973	7.3637	7.19816	6.93515	6.86744	6.62856	7.07843	6.97546	7.15333
213	2	14.755	0.0816933	1.16735	101	0.75	0	6.16439	6.2891	5.88799	6.97953	6.3862	5.63476	6.47599	6.84707	6.98309
213	3	14.5058	0.0741771	1.17111	101	0.75	0	5.85812	6.20658	6.00792	6.34885	6.7158	7.12718	5.60637	6.20374	5.3275
213	4	14.8508	0.0701397	1.16755	101	0.75	0	6.34795	6.03471	6.73316	6.53215	6.15447	6.17956	6.45033	5.87549	5.34245
213	5	14.9633	0.0704571	1.16616	101	0.75	0	7.80629	6.79822	6.32564	7.27743	6.19903	6.47376	7.09724	5.81891	7.11345
213	6	15.0758	0.0723013	1.67037	101	0.75	0	7.82943	7.13573	6.56292	8.74751	5.79598	6.12995	6.95972	5.22023	6.05195
213	7	17.075	0.224321	51.0882	101	0.75	0	15.1002	14.679	14.4778	13.6069	12.0804	12.286	14.0347	25.4691	24.4552
213	8	21.2567	0.742449	206.314	101	0.75	0	19.7737	40.5318	55.3354	19.9707	28.1641	72.5485	38.0257	88.9025	122.783
213	9	24.8558	1.35533	730.615	101	0.75	0	21.4214	39.9012	56.3176	22.2773	32.6558	81.3822	43.0992	83.3878	113.965
213	10	26.83	1.80214	1286.04	101	0.75	0	23.9265	23.8346	24.2821	23.8681	23.5107	28.2619	26.2946	32.625	39.7252
213	11	28.2183	2.1693	1435.44	101	0.75	0	25.4481	25.4482	25.6445	25.6245	24.4851	39.1899	30.5076	37.8908	37.1664
213	12	28.9483	2.33853	1616.98	101	0.75	0	26.5644	43.1006	57.2988	27.0901	34.7974	78.4718	43.4931	74.0645	99.6297
213	13	28.2042	2.13306	1497.97	101	0.75	0	26.9663	40.466	53.0233	26.7547	33.1739	62.8885	38.3089	61.1331	70.8601
213	14	29.3717	2.36522	1765.79	101	0.75	0	26.9317	43.7632	62.0024	26.7289	36.5379	84.3213	48.96	91.2707	121.079
213	15	28.46	2.28425	1239.36	101	0.75	0	26.729	44.699	63.5044	27.5383	37.1979	84.0879	48.9451	85.9769	119.014
213	16	27.3125	1.97686	364.517	101	0.75	0	23.6977	34.5123	49.7124	24.3995	29.0376	49.0237	35.6347	52.2108	71.6243
213	17	23.3375	1.20846	21.6292	101	0.75	0	22.1714	20.7976	20.0124	20.3439	19.4089	20.0765	24.1179	21.4942	20.4942
213	18	21.8275	0.96627	1.37423	101	0.75	0	21.8557	20.5527	20.6892	21.9939	20.9035	21.184	22.3562	20.7909	20.5174
213	19	20.9675	0.820665	1.06583	101	0.75	0	22.9861	21.6698	21.7661	22.1579	20.5007	20.8001	22.0603	23.1243	20.831
213	20	20.2892	0.71341	1.07925	101	0.75	0	23.1009	22.0736	21.8549	23.2673	21.4362	21.3518	23.6276	22.2642	21.3706
213	21	20.0475	0.67588	1.08437	101	0.75	0	23.8362	21.9572	21.463	23.2557	22.5364	22.4638	22.1879	22.5319	21.1278
213	22	20.1533	0.697476	1.08327	101	0.75	0	22.9229	23.078	22.1295	22.4786	22.2642	22.6279	22.5994	21.9495	22.7028
213	23	20.4992	0.728138	1.07233	101	0.75	0	23.9863	22.9668	23.0786	22.8195	22.0564	22.8314	22.366	22.6123	23.3497
214	0	20.145	0.609934	1.08217	101	0.75	0	24.078	22.9885	24.0001	23.8956	22.5508	23.0182	24.1464	23.7892	23.9628
214	1	19.9217	0.541982	1.08786	101	0.75	0	25.2109	23.848	22.8527	23.7205	21.9402	23.7982	23.5582	24.4639	23.2474
214	2	19.905	0.524735	1.08804	101	0.75	0	25.0768	23.6695	23.4773	24.3709	22.4002	23.3162	24.2309	24.4434	23.1807
214	3	20.2325	0.57597	1.07687	101	0.75	0	24.6193	22.9648	23.4734	23.9234	22.7012	23.2549	23.6224	23.8918	23.0497
214	4	20.2792	0.584764	1.07542	101	0.75	0	24.3842	23.2357	23.1704	24.6713	21.7833	22.85	22.5978	23.2871	22.5335
214	5	20.2908	0.568017	1.07542	101	0.75	0	23.4973	22.9809	23.2955	24.0294	23.1926	23.1371	23.0002	23.3555	22.6621
214	6	20.0942	0.527131	1.59352	101	0.75	0	24.2947	22.9939	22.912	23.9921	22.0181	22.8577	23.1199	22.9895	23.1948
214	7	20.68	0.60095	55.4017	101	0.75	0	21.9515	22.8174	24.3679	22.7283	21.8675	22.7979	22.0574	22.1043	21.5448
214	8	22.9442	0.896587	255.442	101	0.75	0	22.6566	41.4212	60.0786	23.0766	31.6237	74.3498	39.6883	73.3398	96.5129
214	9	23.085	0.835289	460.045	101	0.75	0	22.9707	40.265	58.6881	22.2399	32.3786	76.8828	41.8828	81.0447	114.687
214	10	22.3425	0.698714	450.653	101	0.75	0	22.3048	40.5728	58.9754	21.8248	32.0917	76.6888	43.7154	84.6761	109.641
214	11	20.7958	0.371401	376.69	101	0.75	0	21.1158	38.5379	61.8988	21.1581	31.1322	78.9834	43.3927	84.6564	115.411
214	12	21.4442	0.437972	577.279	101	0.75	0	21.5642	40.1016	61.8016	21.5835	31.5585	78.6024	42.9603	81.0841	116.183
214	13	21.9658	0.649148	444.129	101	0.75	0	22.1521	41.3138	61.1203	21.7656	31.9957	78.2088	44.825	83.9466	121.4
214	14	22.9633	0.831074	358.163	101	0.75	0	23.1217	40.4263	58.2831	22.78	32.3077	77.3392	45.975	84.1313	113.931
214	15	23.355	0.928939	318.815	101	0.75	0	22.7616	40.5315	56.5998	22.9148	32.5294	79.1663	44.5995	84.5367	119.533
214	16	23.335	0.970643	167.678	101	0.75	0	22.8265	33.0173	47.3413	22.1387	27.1958	46.0898	34.9776	51.341	71.2885
214	17	22.9842	0.916233	74.0234	101	0.75	0	22.3217	21.7469	21.9632	23.5735	21.533	21.8803	24.3844	22.3806	22.3778
214	18	21.405	0.709626	1.41795	101	0.75	0	23.0462	22.7942	22.8692	23.3217	21.7622	22.5979	24.2763	23.27	23.5841
214	19	20.4433	0.50246	1.07835	101	0.75	0	23.6366	22.5264	21.843	22.9341	21.8407	22.0204	23.0332	21.6801	22.4438
214	20	19.415	0.287269	1.0947	101	0.75	0	22.2342	19.1791	19.7877	21.1923	18.8954	20.2015	21.6925	19.8815	19.29
214	21	19.44	0.336575	1.10026	101	0.75	0	19.8741	19.7011	18.735	18.5953	18.3626	18.2656	19.8236	18.2642	15.6703
214	22	19.8817	0.39823	1.0958	101	0.75	0	21.8912	20.7768	20.4923	20.5737	19.8085	20.8194	20.6534	20.8471	20.7453
214	23	19.5925	0.352921	1.09802	101	0.75	0	21.5717	20.1924	20.8757	19.8475	19.3454	20.3644	20.9779	19.8969	18.9613
215	0	19.2833	0.340005	1.10026	101	0.75	0	20.4477	19.2271	19.8738	17.8733	16.7117	15.6954	16.8535	17.4586	17.1806
215	1	19.5217	0.351568	1.09525	101	0.75	0	20.5411	20.3655	20.7918	19.8234	20.0057	19.462	19.7026	18.768	18.0061
215	2	19.315	0.324159	1.09914	101	0.75	0	18.2781	20.4768	21.8858	20.1857	19.7716	18.6729	17.6562	16.747	18.5083
215	3	19.2375	0.314697	1.09953	101	0.75	0	21.245	21.9796	20.0864	20.208	19.9627	20.2707	20.5025	20.3109	21.3272
215	4	18.1783	0.117378	1.11166	101	0.75	0	19.6837	19.4516	19.8409	18.4896	16.2641	17.222	18.8813	18.3908	18.9708
215	5	18.4025	0.134523	1.11204	101	0.75	0	21.1612	20.5058	19.9188	20.4996	19.3108	19.8136	20.3645	21.0087	20.8291
215	6	18.6458	0.180733	1.60748	101	0.75	0	18.0353	19.0393	18.7723	19.5469	19.0357	19.3445	19.1662	19.0023	16.1885
215	7	19.6317	0.293136	56.7614	101	0.75	0	20.1094	19.9078	18.9214	14.0307	15.1724	15.2227	16.7642	17.3354	18.7396
215	8	21.5158	0.527123	234.482	101	0.75	0	21.6571	40.7335	60.2014	20.9002	31.6481	73.7697	39.6651	76.9985	107.656
215	9	23.2	0.707095	820.335	101	0.75	0	21.6703	40.6284	58.4681	22.4453	32.2686	79.8707	41.1864	83.3821	113.282
215	10	25.6458	1.15708	1112.52	101	0.75	0	23.17	41.4075	60.181	23.8561	33.4413	79.201	44.4111	81.959	113.962
215	11	24.6225	0.962181	1021.41	101	0.75	0	23.2391	40.4961	57.6736	23.4604	32.1905	76.864	44.0537	83.7507	117.406
215	12	28.4367	1.79746	1801.33	101	0.75	0	23.1653	40.7538	59.6586	23.4378	33.0983	80.0689	45.8456	84.7882	111.56
215	13	27.7867	1.63921	1419.87	101	0.75	0	22.8393	40.5775	59.4447	22.7508	33.0499	80.2857	46.2589	82.2233	115.377
215	14	28.0717	1.72677	1280.39	101	0.75	0	22.4874	40.9246	59.2895	22.389	33.0742	80.2191	44.8214	80.4178	120.438
215	15	27.35	1.61452	893.652	101	0.75	0	22.9514	40.6958	60.1115	21.3653	32.6475	79.0596	45.1794	83.4138	115.321
215	16	24.7075	1.10271	288.882	101	0.75	0	20.8787	31.3991	44.2439	20.9488	25.331	45.0694	32.4246	51.5309	64.5615
215	17	22.7292	0.812001	24.1661	101	0.75	0	19.7955	19.8943	19.1738	19.7698	19.4019	19.4816	22.3934	19.9611	19.0311
215	18	21.7467	0.688821	1.27367	101	0.75	0	15.2234	14.8681	15.0105	14.0833	12.3353	14.6735	16.5727	14.7201	14.6248
215	19	20.6725	0.457286	1.0651	101	0.75	0	11.0087	9.08046	9.66128	7.38225	7.69655	9.69333	12.225	11.5685	9.13479
215	20	19.7592	0.263262	1.08054	101	0.75	0	14.3336	14.8369	14.1629	14.322	13.6433	13.3161	13.1465	11.6677	12.2175
215	21	18.8192	0.105678	1.0958	101	0.75	0	13.0753	14.043	12.7892	12.6876	11.8016	11.9058	13.949	12.7641	12.5678
215	22	18.4958	0.101343	1.10212	101	0.75	0	11.1419	10.7975	9.91272	8.61555	8.97074	8.96353	10.6913	13.4552	11.4826
215	23	18.665	0.145737	1.10529	101	0.75	0	12.6507	11.7038	10.7789	11.4373	11.339	11.4779	12.1753	11.7464	10.8275
216	0	18.3825	0.103637	1.10529	101	0.75	0	11.1139	9.96944	7.66666	7.52524	7.77075	7.31056	10.0121	8.9309	7.67573
216	1	19.1525	0.205372	1.10044	101	0.75	0	18.9498	17.0927	16.6759	16.1929	16.4767	15.6	14.9695	14.1308	15.0059
216	2	18.8533	0.166153	1.10286	101	0.75	0	13.6611	14.5798	14.2515	16.0944	16.2902	13.4587	16.3462	14.8783	12.0245
216	3	19.0492	0.152435	1.10025	101	0.75	0	18.3208	18.4127	16.4216	15.1901	15.366	15.5358	14.1318	14.9544	15.4667
216	4	18.785	0.116015	1.10118	101	0.75	0	17.6608	17.5096	17.9707	16.1585	16.0891	14.3043	15.446	16.629	17.0045
216	5	18.8042	0.113666	1.10081	101	0.75	0	13.043	16.425	15.9041	15.8871	14.412	13.502	14.0192	13.2935	10.7043
216	6	19.0667	0.168683	1.57864	101	0.75	0	15.8078	15.9648	15.4901	14.256	13.6231	13.3844	13.4307	13.4466	12.1059
216	7	19.0558	0.152565	26.3891	101	0.75	0	14.366	15.5134	16.6021	12.7319	13.4945	14.4475	13.9278	12.0879	12.2208
216	8	22.095	0.502159	354.285	101	0.75	0	18.2232	38.539	60.4261	16.8493	28.4632	74.3378	37.0413	76.1729	108.766
216	9	24.4383	0.93779	997.347	101	0.75	0	22.4948	41.9244	59.5262	22.8673	33.1671	80.5735	43.4044	89.128	123.775
216	10	25.3742	1.11944	932.211	101	0.75	0	23.3771	42.0638	62.3692	22.3012	33.5908	79.2364	45.5743	86.8852	119.081
216	11	27.2642	1.46052	1297.3	101	0.75	0	24.4847	42.4353	62.872	23.8275	34.7929	80.6175	46.5774	88.1573	122.976
216	12	28.0483	1.68742	1611.44	101	0.75	0	24.5616	42.6164	59.2719	25.2016	34.4168	79.3937	47.1339	85.2828	115.056
216	13	28.6292	1.84111	1664.21	101	0.75	0	24.3659	43.6642	61.6195	24.4955	35.4904	81.7576	49.8998	85.8478	115.939
216	14	26.5983	1.37114	803.9	101	0.75	0	23.1044	41.0833	59.0737	23.1765	33.5945	77.8418	47.1633	83.0831	107.781
216	15	24.5408	0.994301	565.525	101	0.75	0	22.6068	41.2826	58.3229	21.9476	32.3724	79.2982	46.0395	83.1766	112.912
216	16	22.6642	0.761014	136.974	101	0.75	0	21.3774	33.3886	46.8609	21.2769	26.7913	45.8646	34.6468	52.202	71.955
216	17	21.815	0.664082	30.0345	101	0.75	0	19.2	18.2662	18.2493	18.7391	16.8387	19.1095	20.825	16.3211	16.1838
216	18	19.555	0.311492	1.39994	101	0.75	0	8.44118	7.96533	8.55495	8.54933	7.43255	6.07805	9.25771	7.27171	7.79273
216	19	20.1033	0.410335	1.08201	101	0.75	0	16.0162	14.9149	16.0615	18.1724	15.9309	15.6463	18.0855	16.8582	15.5204
216	20	20.6092	0.539011	1.07414	101	0.75	0	19.1478	18.6713	18.1563	17.844	15.5679	17.6923	18.066	19.0861	18.0797
216	21	18.4675	0.246992	1.10235	101	0.75	0	7.59545	7.88259	7.98913	7.67614	6.37649	7.9208	7.856	7.87808	7.72739
216	22	17.025	0.13451	1.12701	101	0.75	0	3.09548	3.07013	3.6062	2.95284	3.28718	3.09238	3.47411	2.8552	2.66739
216	23	16.4058	0.108869	1.13869	101	0.75	0	1.96835	2.80769	2.2351	1.85229	1.95699	2.32918	3.08561	2.56869	2.27842
217	0	15.9958	0.0963034	1.14545	101	0.75	0	2.08278	1.66064	1.89948	2.01106	1.78038	1.39727	2.4637	1.5193	1.23878
217	1	15.6092	0.0886136	1.15225	101	0.75	0	2.08656	1.98206	1.97267	1.9937	1.37376	1.1271	1.83488	1.42608	0.881969
217	2	15.4317	0.081798	1.15596	101	0.75	0	2.10195	1.83703	1.82467	1.77561	1.87215	1.44516	1.74937	1.38503	1.33559
217	3	15.01	0.0793026	1.16282	101	0.75	0	1.161	0.864765	0.914954	0.783651	0.581641	0.33568	0.504542	0.936021	0.136875
217	4	14.6783	0.0735805	1.16873	101	0.75	0	0.979953	0.441821	0.35157	0.534287	0.452723	1.08303	0.518154	0.677735	0.0920598
217	5	14.35	0.0734386	1.17468	101	0.75	0	0.192313	0.823398	-0.438861	-0.0738047	-0.218981	0.411752	0.727141	0.292017	0.0055085
217	6	14.205	0.0685077	1.72321	101	0.75	0	-0.0712839	0.250515	0.0350371	0.496953	0.000322984	-0.0198339	0.110659	-0.207449	-0.106358
217	7	16.28	0.142318	90.5044	101	0.75	0	2.56523	4.48845	3.70127	0.981475	1.38786	0.98693	0.442748	-0.166397	0.353766
217	8	21.7725	0.579265	356.943	101	0.75	0	10.2789	33.6347	51.7537	9.82673	22.3947	56.7581	27.13	57.4125	84.6339
217	9	25.5908	1.23387	878.757	101	0.75	0	20.0168	18.9403	19.6079	18.5814	18.6923	18.6322	18.209	17.8084	18.5702
217	10	27.6175	1.59276	1360.79	101	0.75	0	22.5272	20.8976	20.5304	20.0321	19.7946	21.5456	21.5258	21.0763	19.8784
217	11	28.2008	1.72717	1080.33	101	0.75	0	22.88	28.5346	35.3894	22.3155	23.7543	35.7502	34.2729	56.5615	67.8344
217	12	28.3117	1.79452	1177.19	101	0.75	0	22.2358	41.4165	59.5261	22.9531	33.703	82.9956	44.4474	85.5442	120.013
217	13	29.52	2.00508	1298.99	101	0.75	0	22.1105	42.0173	58.9143	22.2045	32.9992	79.3489	44.8859	91.0366	123.291
217	14	30.3717	2.21093	1820.52	101	0.75	0	21.8619	40.3104	58.8621	21.6598	33.6027	78.5714	44.9062	87.0922	117.684
217	15	29.005	1.85362	1124.01	101	0.75	0	21.5683	40.8308	59.6618	21.8531	32.792	77.602	47.6833	84.2297	120.799
217	16	28.1917	1.64601	456.383	101	0.75	0	19.0318	32.4795	45.0649	18.231	24.6598	45.0232	32.8854	51.9406	72.5153
217	17	22.8208	0.632181	29.5672	101	0.75	0	8.8343	9.77626	9.5031	7.72707	7.7405	8.25516	12.6592	9.97601	10.3934
217	18	19.7833	0.244612	1.46655	101	0.75	0	5.18175	6.08632	5.13872	4.95642	5.10829	5.05756	6.37545	5.87594	6.46572
217	19	18.7642	0.186763	1.10157	101	0.75	0	5.07984	5.20733	4.71506	4.53827	4.14479	3.86435	5.5646	4.36985	4.73607
217	20	17.6367	0.135367	1.11865	101	0.75	0	2.22736	2.23286	2.54614	2.76697	2.11405	1.48212	2.62812	1.78101	1.56035
217	21	17.1025	0.108628	1.12967	101	0.75	0	1.81522	1.59392	1.48077	1.99984	1.59066	1.36081	2.33984	1.65614	1.65169
217	22	16.8175	0.0967655	1.13484	101	0.75	0	2.12725	2.40182	3.10529	2.20997	2.44844	2.05293	3.07823	2.31212	1.59183
217	23	16.5492	0.0905786	1.13907	101	0.75	0	1.82845	2.89663	2.59944	2.35096	2.11508	1.93063	2.27631	2.97494	1.38349
218	0	16.2383	0.0851051	1.14409	101	0.75	0	2.47394	2.90291	2.60817	2.96256	2.33546	1.88832	2.63482	2.00252	2.20897
218	1	16.0067	0.0806776	1.14894	101	0.75	0	2.28615	2.5158	1.69251	1.76765	2.27241	1.61648	1.87939	1.87851	1.9565
218	2	15.7133	0.0772562	1.15381	101	0.75	0	2.11293	2.22767	2.08314	2.56482	1.04369	1.52155	1.62008	1.35937	0.99623
218	3	15.9658	0.0712502	1.15012	101	0.75	0	0.929719	1.56123	1.11913	1.38616	1.10932	1.05395	0.931915	0.664906	1.10673
218	4	16.4417	0.0741237	1.13966	101	0.75	0	0.355351	0.471305	0.894248	0.751674	0.930583	0.98621	0.607929	1.01214	0.322977
218	5	17.2125	0.081336	1.12547	101	0.75	0	0.393162	-0.19679	0.384159	0.149236	0.308303	0.576816	-0.129225	0.150046	0.300741
218	6	16.5525	0.0806266	1.93493	101	0.75	0	-0.847041	-0.31702	-0.449755	-0.290462	-0.348871	-0.407532	-0.273897	-0.526457	-0.0724903
218	7	18.4225	0.199017	162.779	101	0.75	0	1.03937	2.70761	2.93019	0.0232257	0.460862	0.137757	0.283294	-0.061201	-0.0451223
218	8	22.9467	0.641152	535.099	101	0.75	0	7.34742	31.4496	52.9911	5.36357	21.3768	4.79275	29.2529	79.7268	114.647
218	9	25.4767	1.10211	861.035	101	0.75	0	14.7353	35.3978	55.7873	13.7034	26.0893	45.6178	38.5591	86.9032	121.203
218	10	28.2683	1.63514	1457.03	101	0.75	0	19.9562	39.2831	57.0621	21.4095	31.169	76.646	42.2576	84.2904	110.697
218	11	28.7675	1.74697	1386.73	101	0.75	0	21.8318	40.88	60.5819	21.8022	32.3389	77.0559	44.0136	82.0676	124.34
218	12	29.5633	1.9232	1514.83	101	0.75	0	22.3043	41.1951	60.8986	22.1531	33.6759	80.1229	46.6968	91.548	118.63
218	13	30.87	2.20524	1659.27	101	0.75	0	21.586	40.557	61.7069	21.8073	33.0702	79.9812	46.3264	90.5303	117.452
218	14	28.9625	1.81835	1164.41	101	0.75	0	20.74	39.819	59.3857	21.0826	32.9356	79.6177	46.186	90.3002	123.353
218	15	29.8583	2.00606	1257.43	101	0.75	0	20.986	39.9787	60.662	20.5465	32.068	81.7801	45.7264	90.0172	119.614
218	16	29.6633	1.98077	551.267	101	0.75	0	19.8388	31.8601	46.006	19.2574	25.5221	45.995	33.5216	55.3864	72.7411
218	17	25.1567	1.16241	33.1612	101	0.75	0	14.4744	14.1897	13.8837	14.9746	14.8257	14.3438	17.3218	14.9407	14.3641
218	18	22.0717	0.499379	1.3228	101	0.75	0	6.47597	6.31221	6.40818	6.78901	6.36277	6.57	7.92105	6.79363	6.31725
218	19	20.2208	0.283294	1.0731	101	0.75	0	4.54914	5.15466	4.35954	5.65301	4.59842	4.86436	5.49367	4.97879	4.42818
218	20	18.6717	0.183701	1.10083	101	0.75	0	4.22117	4.85496	4.04526	3.858	3.43022	3.67494	5.05719	4.42801	4.8582
218	21	18.0508	0.141206	1.11411	101	0.75	0	2.46071	3.77119	2.76103	3.21573	2.40376	2.41637	3.63607	2.03074	2.55689
218	22	17.6967	0.120389	1.12035	101	0.75	0	2.86988	2.85087	2.73052	2.36681	2.30442	2.17672	2.92558	2.38481	2.47878
218	23	17.5908	0.104674	1.12262	101	0.75	0	3.3237	3.02261	2.10762	2.70898	2.49137	2.20503	2.18126	1.8691	2.39234
219	0	18.2017	0.098699	1.11242	101	0.75	0	1.46024	1.67011	1.7323	1.7616	0.852674	1.02191	1.58974	1.59627	0.910363
219	1	18.235	0.0990349	1.11035	101	0.75	0	1.17324	1.51277	1.37958	1.70237	1.0238	1.42707	1.93394	0.839377	1.46217
219	2	18.0408	0.0982899	1.11242	101	0.75	0	1.57917	1.09121	1.09411	0.856266	0.751521	0.909823	1.21192	0.312543	0.410897
219	3	17.5033	0.0852184	1.12262	101	0.75	0	1.64732	1.87484	1.12165	1.61443	1.56999	1.38498	1.14625	1.62022	1.31267
219	4	17.7867	0.0779651	1.11997	101	0.75	0	1.48407	1.44439	1.44058	1.11513	0.959513	1.29529	1.07625	1.1122	1.07161
219	5	17.6508	0.0796506	1.12129	101	0.75	0	1.0761	1.51502	1.51441	0.868201	1.39224	1.16095	1.26293	1.40014	0.483166
219	6	17.6092	0.0732909	1.83447	101	0.75	0	1.0794	1.5483	0.874615	1.32777	0.921249	1.24243	1.3152	0.934595	0.658207
219	7	18.6767	0.0861904	45.8077	101	0.75	0	1.04561	3.76405	4.11681	1.3589	0.925885	0.84856	0.69643	-0.0324076	0.248542
219	8	21.8008	0.284185	264.012	101	0.75	0	10.6791	39.2865	59.5397	10.6073	24.9092	7.61479	33.7852	84.5946	121.448
219	9	24.1092	0.793885	492.392	101	0.75	0	15.8217	37.6486	57.3778	16.176	29.0987	50.8447	40.773	86.3125	133.947
219	10	25.5525	1.05907	774.327	101	0.75	0	18.8462	38.7096	56.2572	19.644	31.247	77.4013	42.2259	81.2354	115.8
219	11	30.0708	1.95566	1635.93	101	0.75	0	21.8166	41.2163	61.39	22.2091	33.2101	80.9165	46.6731	90.1417	120.185
219	12	29.5617	1.86875	1416.81	101	0.75	0	22.0978	42.456	60.1693	21.4465	33.8932	80.96	47.0162	90.8841	118.235
219	13	30.0517	1.97433	1210.81	101	0.75	0	21.3536	40.9971	62.1621	21.4551	33.1679	81.2441	46.7109	90.4291	115.341
219	14	28.525	1.63089	915.326	101	0.75	0	21.7464	40.8845	61.7996	21.1237	33.6146	79.8092	46.8413	92.8811	121.561
219	15	28.3817	1.60329	837.636	101	0.75	0	20.5448	40.5823	60.4071	20.7252	32.9262	81.0864	47.2834	91.0956	123.56
219	16	26.895	1.31523	351.613	101	0.75	0	19.8494	31.994	46.8751	19.5066	25.4868	44.8412	32.9846	54.3259	72.0631
219	17	25.0958	0.944539	39.0949	101	0.75	0	15.2788	15.2722	14.9368	15.1114	14.1347	15.4952	19.0542	14.7517	14.6891
219	18	23.0175	0.496331	1.26698	101	0.75	0	7.30187	7.186	7.60544	6.92523	6.71969	7.69006	9.64601	8.32538	7.74039
219	19	21.5567	0.304315	1.05346	101	0.75	0	5.37594	5.67408	4.79374	4.52435	4.91434	5.39804	6.80439	5.67325	4.8972
219	20	21.2617	0.262861	1.05971	101	0.75	0	4.60441	4.74701	4.41212	4.10145	3.29064	2.96445	4.00779	4.49129	4.30878
219	21	21.0558	0.239253	1.06348	101	0.75	0	3.48007	3.62918	2.86456	2.9197	2.95268	3.68079	3.12692	2.83895	3.1672
219	22	20.3908	0.184546	1.07415	101	0.75	0	2.52084	2.94401	2.58107	2.50018	3.32879	3.38429	2.90578	2.88514	2.75873
219	23	20.6283	0.180176	1.07142	101	0.75	0	2.37347	3.1844	2.2694	2.62156	2.46044	2.37374	2.53199	1.55351	2.17169
220	0	20.7225	0.173409	1.07015	101	0.75	0	1.5419	2.53044	1.81567	2.07536	1.30893	1.50895	1.47213	1.5766	0.88539
220	1	20.695	0.157096	1.07142	101	0.75	0	1.1718	1.59946	1.5383	2.06894	0.700116	0.830465	0.947274	0.770957	1.06568
220	2	20.4383	0.13459	1.07451	101	0.75	0	0.879754	0.675817	1.15226	0.342801	0.833625	0.820742	1.07657	0.107283	0.705787
220	3	20.3683	0.131072	1.07614	101	0.75	0	0.943043	1.35764	1.19413	1.46204	1.04875	1.0477	0.949434	0.496422	-0.0868585
220	4	20.1025	0.12044	1.08089	101	0.75	0	1.2386	1.43753	0.655769	0.730761	0.475752	0.649737	0.67309	0.749576	0.879916
220	5	20.3408	0.121531	1.07705	101	0.75	0	-0.231171	-0.085094	-0.29563	-0.452338	-0.293865	-0.257593	-0.408613	-0.0979768	0.0297976
220	6	20.41	0.115887	1.36949	101	0.75	0	-0.376563	-0.412358	-0.384666	-0.712316	-0.363959	-0.568409	-0.458217	-0.765927	-0.962292
220	7	21.1492	0.144792	33.0359	101	0.75	0	-0.516824	1.66424	1.93495	-0.939966	-0.291722	0.11165	-0.337006	-0.288697	-0.612324
220	8	23.1225	0.359155	196.298	101	0.75	0	6.08688	26.7551	46.3259	5.90157	18.3831	60.6612	24.4191	67.6318	96.7733
220	9	25.3325	0.748684	545.16	101	0.75	0	5.03078	5.64894	6.86993	4.83574	5.77958	11.0939	8.84806	16.351	24.9046
220	10	30.4033	1.68269	1602.51	101	0.75	0	9.41209	9.12657	9.30559	8.94696	8.06801	9.20219	9.93422	9.01899	9.35476
220	11	31.2325	1.88844	1442.96	101	0.75	0	12.3763	12.7187	12.5527	12.1357	12.0699	13.0212	13.2285	12.3322	12.6492
220	12	30.39	1.70045	1523.34	101	0.75	0	14.9101	14.1825	13.8126	14.9173	14.5591	14.9761	14.1627	14.3173	14.3292
220	13	31.3833	1.94563	1677.7	101	0.75	0	15.429	24.7657	45.2132	15.0691	21.7172	49.718	26.865	50.1864	64.5567
220	14	31.5317	1.97535	1901.54	101	0.75	0	16.7581	37.3723	58.9252	18.2477	30.3055	79.7338	38.8797	85.9479	121.257
220	15	31.3058	1.89553	1557.71	101	0.75	0	17.5271	38.3481	59.6697	18.2081	30.9412	77.7944	41.5792	89.6408	123.012
220	16	29.1383	1.35782	457.879	101	0.75	0	18.7072	32.3092	45.9808	19.4692	26.1202	45.3848	32.1416	54.7903	75.4351
220	17	25.7625	0.685976	44.2374	101	0.75	0	17.3479	17.3511	17.3087	17.3002	16.7618	16.9802	19.7975	17.3406	17.2063
220	18	23.86	0.38634	1.35901	101	0.75	0	8.51173	9.0909	8.44971	8.47034	8.91116	9.0514	11.4729	8.304	8.22138
220	19	22.5433	0.222122	1.04177	101	0.75	0	1.94044	2.14689	1.67334	1.50582	1.83297	1.65722	3.26709	1.70746	1.94214
220	20	22.06	0.188834	1.05079	101	0.75	0	0.45564	0.348293	-0.0314023	0.129277	-0.213237	-0.00403429	0.256034	-0.0252805	-0.0779639
220	21	22.345	0.185736	1.04671	101	0.75	0	0.462122	1.02784	0.162604	0.000863142	0.280827	0.0167618	0.846174	0.0320213	-0.143989
220	22	22.7242	0.194519	1.04	101	0.75	0	-0.0310422	-0.627971	-0.788614	-1.05916	-1.10109	-0.981675	-0.712956	-0.872833	-0.604456
220	23	22.7742	0.175044	1.04	101	0.75	0	-0.457767	-0.690638	-0.728026	-0.472252	-0.442012	-0.486215	-0.573955	-1.12684	-0.734796
221	0	22.7325	0.164619	1.04053	101	0.75	0	-0.901507	-0.803495	-0.236122	-0.264138	-0.559821	-0.476177	-0.293055	-0.652179	-0.033833
221	1	22.625	0.157118	1.04264	101	0.75	0	-0.746751	-0.837939	-0.755124	-0.901309	-0.343542	-0.77754	-1.15857	-1.12	-1.0379
221	2	22.7592	0.157581	1.04088	101	0.75	0	-0.820303	-0.890451	-1.00351	-1.17563	-0.948987	-1.14701	-0.86654	-0.885662	-0.952714
221	3	22.7208	0.130267	1.04264	101	0.75	0	-0.713082	-0.652476	-0.769978	-1.33831	-0.79686	-1.03029	-1.07871	-0.668428	-0.979739
221	4	22.6492	0.102141	1.04405	101	0.75	0	-1.00063	-0.856899	-0.978299	-1.13911	-1.01724	-1.44045	-0.768358	-1.04816	-0.975292
221	5	22.605	0.105129	1.04441	101	0.75	0	-1.0451	-1.16771	-0.926354	-1.44397	-1.49462	-1.26922	-1.52355	-1.26283	-1.33689
221	6	22.6167	0.106428	1.57212	101	0.75	0	-1.24433	-1.34354	-1.23505	-1.34715	-1.64673	-1.34525	-1.12852	-1.46296	-1.35023
221	7	23.2483	0.123398	29.9782	101	0.75	0	-1.07211	0.691284	0.848155	-0.85806	-1.28372	-0.633723	-0.982134	-1.38769	-1.19082
221	8	24.2067	0.174464	54.2695	101	0.75	0	1.71034	24.4097	45.2911	0.687008	13.0869	59.9588	20.1193	65.8401	90.4119
221	9	24.3933	0.22398	79.0195	101	0.75	0	2.32666	23.5948	41.7807	2.94579	15.2449	65.642	25.3975	70.3755	110.8
221	10	25.3592	0.431381	415.398	101	0.75	0	5.77566	26.9	48.9426	6.81737	19.1852	68.1229	31.2104	76.7522	116.581
221	11	27.0692	0.771162	731.772	101	0.75	0	8.45142	29.3409	49.8686	8.71244	20.7218	68.3439	35.1959	81.776	114.201
221	12	29.6617	1.31701	1489.13	101	0.75	0	12.7384	31.2065	48.8691	12.0516	21.8109	70.6771	36.2119	75.347	112.402
221	13	31.3233	1.81703	1607.72	101	0.75	0	16.7615	35.4411	54.6291	15.7642	26.6397	73.0798	40.1039	82.8142	123.268
221	14	29.7408	1.40312	1024.47	101	0.75	0	15.3387	34.8104	55.0693	15.6387	26.342	76.1446	39.8593	88.0381	126.314
221	15	27.6225	0.998539	482.421	101	0.75	0	16.7625	38.8056	58.5119	16.9879	29.7648	79.8317	44.4428	90.5602	126.203
221	16	26.2117	0.731106	94.0252	101	0.75	0	14.6488	29.0113	44.2047	16.6667	23.2217	41.2211	28.6873	51.9525	72.3952
221	17	24.9658	0.74442	3.25509	101	0.75	0	15.9464	15.257	15.1963	16.1394	15.5384	15.5674	17.8047	14.9844	14.5461
221	18	24.1358	0.65617	1.12758	101	0.75	0	15.4405	14.35	14.2446	13.8353	13.3449	13.436	15.2308	13.4287	13.0447
221	19	23.3933	0.652271	1.0302	101	0.75	0	15.9383	14.7267	14.5209	14.3164	13.3358	14.3206	14.1897	14.3643	12.7299
221	20	22.5108	0.512166	1.04089	101	0.75	0	9.36077	9.24837	8.92892	8.64185	8.69487	8.12566	8.61984	8.74189	7.79273
221	21	21.645	0.401258	1.05168	101	0.75	0	7.02792	6.79855	6.13297	6.75535	7.09373	6.75888	7.37863	7.39829	6.79585
221	22	21.0633	0.388477	1.06061	101	0.75	0	7.07816	6.74887	6.20274	6.71393	7.35385	7.2547	7.42114	7.25204	6.74488
221	23	21.1125	0.364779	1.05989	101	0.75	0	5.51575	5.51909	5.08965	5.17579	5.51627	5.44733	4.97042	5.2653	5.36793
222	0	20.4992	0.34726	1.06854	101	0.75	0	5.55401	5.90692	6.47471	7.57516	6.73121	6.02381	6.71946	6.37883	6.53825
222	1	20.1542	0.317502	1.07614	101	0.75	0	6.39774	6.20017	6.16187	6.22784	5.77031	5.97794	6.71895	6.04528	5.62416
222	2	20.2825	0.29949	1.07396	101	0.75	0	4.80832	5.67204	5.29633	5.41021	4.61361	4.61121	5.30496	5.58259	4.14081
222	3	20.355	0.30856	1.07251	101	0.75	0	5.86235	5.61607	5.32614	4.96303	4.81302	4.8446	4.89536	5.01556	3.95636
222	4	20.3025	0.326752	1.07287	101	0.75	0	6.5344	6.8754	6.51419	5.86378	5.92688	6.02852	5.58457	6.38653	6.00038
222	5	20.0925	0.287713	1.07578	101	0.75	0	5.66133	5.49786	5.21529	5.14211	5.13864	4.9918	5.28426	4.99304	4.74174
222	6	20.0558	0.270888	1.349	101	0.75	0	5.82536	5.29193	4.41858	5.00161	4.0675	3.88725	5.81678	5.0244	4.94059
222	7	20.3892	0.28468	10.0673	101	0.75	0	5.37058	7.94122	7.30626	4.42849	4.19906	5.09593	4.38921	4.69684	4.49757
222	8	21.5675	0.46674	133.571	101	0.75	0	9.66094	35.263	53.3245	11.4065	22.2318	68.0735	27.5941	71.3051	100.791
222	9	24.2675	0.919158	564.438	101	0.75	0	14.2579	37.8374	59.2554	12.8612	27.8341	81.9658	34.9922	87.2667	126.246
222	10	27.2758	1.57928	936.059	101	0.75	0	18.154	39.9104	61.0185	18.6952	31.6626	81.1841	42.8746	89.9992	128.052
222	11	29.1517	2.07247	1239.86	101	0.75	0	23.9956	42.8481	64.6616	23.5999	34.7669	85.6603	49.9572	92.1082	125.106
222	12	30.155	2.30011	1467.22	101	0.75	0	25.7924	45.0558	64.9661	25.1368	36.956	86.9837	52.8159	100.108	128.232
222	13	32.0317	2.58079	2067.18	101	0.75	0	26.0095	45.2486	67.7832	26.7429	37.8802	85.6669	52.4852	98.5078	126.742
222	14	30.2425	2.02401	1243.87	101	0.75	0	25.6268	44.386	66.2171	24.4018	35.6952	85.6026	50.9218	97.4852	123.556
222	15	28.9642	1.81163	931.662	101	0.75	0	24.9258	46.6107	64.7604	25.7611	37.0583	86.5524	51.3184	97.2868	131.596
222	16	26.1258	1.20134	219.232	101	0.75	0	23.4165	37.4384	52.6151	23.8359	30.1053	50.6339	36.4333	57.9632	80.9963
222	17	24.7392	0.984514	38.8702	101	0.75	0	22.2926	21.8449	22.3294	21.5964	21.2604	22.0372	25.1445	21.687	21.9546
222	18	23.3225	0.816229	1.32912	101	0.75	0	20.517	20.2988	20.0032	16.6591	15.6391	17.8371	20.0797	18.3575	16.8337
222	19	22.47	0.731914	1.04195	101	0.75	0	20.2493	19.4997	19.8216	18.2019	17.0966	18.0003	19.4371	18.1693	17.09
222	20	20.605	0.432805	1.06802	101	0.75	0	13.3565	12.771	13.0539	12.05	11.4911	11.8726	12.9226	12.948	12.5182
222	21	19.8025	0.276037	1.0818	101	0.75	0	8.74355	8.97176	8.36661	8.15172	7.75859	7.28175	8.70295	8.2792	8.06846
222	22	19.5567	0.25293	1.08547	101	0.75	0	8.82818	8.49353	7.40351	7.72781	7.22814	7.83015	8.28037	8.21933	7.70755
222	23	19.6158	0.261241	1.08529	101	0.75	0	8.4886	8.46605	8.4976	9.11171	8.42875	8.44795	8.11105	8.04315	8.35275
223	0	19.9192	0.279423	1.07961	101	0.75	0	8.44016	8.30394	7.81205	9.06036	8.51849	8.69732	8.54306	7.9046	8.87411
223	1	19.6125	0.260528	1.08346	101	0.75	0	8.35302	8.05917	7.46887	7.53756	7.33021	8.11773	7.40216	7.31105	7.78692
223	2	19.0475	0.205479	1.09358	101	0.75	0	6.51531	6.86845	7.02567	6.63942	7.05632	7.68367	7.09875	7.31704	7.60868
223	3	19.3567	0.21516	1.08859	101	0.75	0	5.97605	5.82768	5.4277	6.0169	6.01541	5.6651	4.9851	5.33628	5.63819
223	4	18.4117	0.168836	1.10381	101	0.75	0	4.40924	4.88177	4.81201	3.90012	3.83141	3.35084	3.42062	4.15176	3.59687
223	5	18.4517	0.159747	1.10474	101	0.75	0	6.12226	5.87675	6.06581	6.15859	5.55405	5.39664	5.08802	6.25054	5.23827
223	6	18.4275	0.158366	1.69873	101	0.75	0	5.04545	4.39348	4.05741	3.25326	2.99111	3.53778	4.06146	3.83617	3.24143
223	7	19.6558	0.270085	87.6871	101	0.75	0	4.25439	4.82314	4.93247	1.44165	2.27667	3.30218	4.48999	2.86033	2.7902
223	8	24.5258	1.06522	353.935	101	0.75	0	14.115	33.8038	47.7905	13.6208	24.0012	65.2006	33.6637	72.8283	95.07
223	9	26.8258	1.61602	1237.03	101	0.75	0	22.603	26.9291	33.7719	22.1966	25.9681	37.7426	23.9894	32.3878	40.2782
223	10	28.61	1.95818	1588.77	101	0.75	0	25.9452	23.8735	25.8664	26.3693	25.5164	25.0053	25.0305	25.0421	25.3076
223	11	28.9325	2.05416	1609.74	101	0.75	0	25.6365	24.6275	25.5422	24.0257	24.6719	24.8731	25.2554	24.31	24.5874
223	12	29.6042	2.3035	1965.99	101	0.75	0	23.5468	24.4532	24.2763	24.3317	23.8641	24.3451	24.8957	23.9508	23.8861
223	13	29.8558	2.41477	1974.65	101	0.75	0	23.7794	23.7714	23.4672	24.1477	23.1336	24.7109	23.9938	23.6258	24.258
223	14	29.8592	2.464	1874.53	101	0.75	0	25.0924	38.5752	50.7307	24.4286	31.7299	77.6532	44.9714	86.6483	106.393
223	15	29.1558	2.31075	1355.37	101	0.75	0	26.5633	45.0716	64.2262	25.8975	36.7118	84.6146	48.0504	94.1711	123.076
223	16	27.7808	2.03004	471.262	101	0.75	0	26.0868	38.274	52.0751	26.1212	32.3461	49.6103	37.8155	61.6126	76.1101
223	17	23.59	1.26397	40.8474	101	0.75	0	24.1736	22.5187	22.2782	23.0995	22.9428	24.7603	27.2524	24.2784	24.9884
223	18	19.9825	0.637848	1.51538	101	0.75	0	16.2535	14.1895	13.4091	13.2269	14.0651	16.487	16.2615	15.0468	14.8544
223	19	17.575	0.319165	1.113	101	0.75	0	11.6854	11.2981	11.3435	10.8743	10.0697	11.0275	11.8328	11.0348	11.3266
223	20	16.5592	0.238537	1.13254	101	0.75	0	11.3959	11.0719	9.76049	10.6252	10.4538	10.9367	11.1026	11.4881	10.6428
223	21	15.9633	0.190169	1.14409	101	0.75	0	10.4678	10.0052	9.15011	10.2169	9.03158	9.4517	10.3269	9.51076	9.95617
223	22	15.5208	0.15754	1.15264	101	0.75	0	9.84178	9.14487	8.05548	8.00324	8.81885	8.50777	9.82345	8.73333	8.16767
223	23	15.3467	0.140697	1.15615	101	0.75	0	8.4507	8.17214	7.46149	7.66505	8.74978	8.08087	8.78754	8.05854	7.78349
224	0	15.0525	0.126207	1.16203	101	0.75	0	8.11526	9.34503	7.57186	8.8882	8.4073	8.42869	8.54137	8.43229	8.23096
224	1	14.9858	0.114127	1.16321	101	0.75	0	7.83762	7.45791	7.14676	7.08831	7.0146	7.04845	7.64035	6.63712	6.6337
224	2	14.93	0.103998	1.16321	101	0.75	0	6.8304	7.00069	6.09831	6.31638	5.68325	6.14229	6.27573	5.77417	6.49412
224	3	15.1033	0.101599	1.16007	101	0.75	0	3.97891	4.4606	4.47712	4.21175	3.7236	4.81174	4.73594	4.3211	4.14287
224	4	15.2008	0.092132	1.15773	101	0.75	0	4.79815	3.84813	3.77113	2.94625	2.91539	2.98705	3.27141	3.18447	3.26743
224	5	16.635	0.107136	1.13236	101	0.75	0	2.66705	3.05283	2.86366	3.26722	2.52084	3.16372	2.64348	2.82783	2.07008
224	6	17.325	0.120072	1.46611	101	0.75	0	2.1042	2.35109	2.22079	1.98882	1.83047	1.59402	1.60358	1.29095	1.28359
224	7	18.0742	0.156035	26.6199	101	0.75	0	3.19982	5.13607	5.05842	2.56247	2.38267	2.48713	2.4646	2.94928	3.09843
224	8	20.6767	0.430168	258.484	101	0.75	0	12.9158	36.743	54.3213	10.5599	22.8501	70.92	32.8872	79.3017	106.473
224	9	24.5317	1.08459	792.473	101	0.75	0	18.0733	25.0295	32.6299	18.3977	23.3079	46.1823	28.5259	53.5886	39.4346
224	10	27.025	1.58974	1057.69	101	0.75	0	25.0561	22.781	24.1138	23.8099	23.0492	22.6142	22.7287	23.258	23.3819
224	11	27.5633	1.71526	1099.26	101	0.75	0	23.6961	23.0761	23.8797	23.4565	22.2639	24.3696	24.3751	22.9279	22.6306
224	12	29.0667	1.99901	1431.38	101	0.75	0	25.5235	38.9501	51.2203	25.145	32.3452	81.1993	47.3594	87.5301	111.312
224	13	30.0717	2.19781	1941.84	101	0.75	0	25.0193	45.5336	64.8573	24.9638	36.6534	83.1969	48.0805	98.0608	124.156
224	14	30.6142	2.34988	1964.63	101	0.75	0	26.0157	44.2198	64.5691	24.8612	35.924	84.0498	49.7904	95.2821	128.759
224	15	29.2867	2.13093	1378.65	101	0.75	0	26.8218	46.1739	65.0492	26.662	37.3434	87.4854	51.1543	87.8696	130.304
224	16	27.7583	1.74784	432.569	101	0.75	0	29.1901	40.8607	55.6188	27.9821	34.4182	54.8446	41.2377	60.316	84.1905
224	17	23.8917	0.995165	42.0717	101	0.75	0	24.7314	22.2188	22.4984	22.8797	22.1608	22.6104	24.746	21.397	22.515
224	18	20.6275	0.45305	1.4929	101	0.75	0	13.5953	12.2906	13.4237	15.2859	12.3303	12.5693	13.9662	12.7333	13.6249
224	19	19.1975	0.254836	1.09081	101	0.75	0	9.65741	9.18547	7.57474	9.8061	8.16533	9.35663	9.71261	9.09254	8.75027
224	20	18.2192	0.184724	1.10811	101	0.75	0	8.06241	7.85868	6.48335	6.91929	6.80133	7.8779	8.04986	7.22809	6.68125
224	21	17.5458	0.149601	1.11959	101	0.75	0	6.57212	6.75637	6.71607	7.34194	6.22543	6.51203	7.30725	6.35831	6.15612
224	22	18.3692	0.15379	1.10774	101	0.75	0	6.22003	6.10869	6.77225	7.01591	6.81198	6.77175	7.01379	6.47034	5.99568
224	23	19.1933	0.176766	1.09155	101	0.75	0	5.47632	5.66647	5.29383	4.7047	4.42798	4.89502	5.25611	5.34227	5.37922
225	0	19.5017	0.184474	1.08455	101	0.75	0	5.00399	5.59569	4.72453	4.4975	4.60275	5.25679	4.48429	4.28575	4.69852
225	1	19.6742	0.183051	1.08217	101	0.75	0	3.50119	4.01939	4.16992	3.74846	3.71511	3.10582	4.42701	4.27948	3.58915
225	2	19.7617	0.185328	1.08143	101	0.75	0	4.4989	4.47321	4.08185	4.38478	4.14778	4.70326	4.21019	4.33935	3.78543
225	3	19.8492	0.178933	1.07979	101	0.75	0	4.45415	4.11573	4.37261	4.03072	4.01917	5.16675	3.47666	3.84245	3.77645
225	4	19.8792	0.178232	1.07924	101	0.75	0	3.28433	4.29481	3.67509	3.3438	2.9516	3.60674	4.20476	2.71209	3.19431
225	5	19.93	0.168502	1.0787	101	0.75	0	3.37601	3.27516	3.98445	2.64742	2.43374	2.49702	2.85315	3.26088	3.10408
225	6	19.945	0.167702	1.37295	101	0.75	0	5.32343	3.94574	3.24162	3.23015	3.71231	3.82993	3.52218	2.05127	4.61402
225	7	20.7583	0.23338	75.5608	101	0.75	0	5.15707	6.09519	7.31525	4.5853	3.34008	4.10534	4.70178	4.96225	3.72798
225	8	23.38	0.658644	342.729	101	0.75	0	8.8414	30.1931	49.3111	9.248	18.4011	64.2632	27.5904	71.0622	97.4888
225	9	26.9092	1.30592	1177.3	101	0.75	0	19.4208	24.1124	32.0643	18.0597	19.5934	24.1551	21.4627	29.5795	36.0952
225	10	29.03	1.70815	1241.71	101	0.75	0	23.0397	22.4653	22.399	21.8804	21.509	21.9396	22.8861	21.6365	22.3971
225	11	29.8525	1.88517	1411.37	101	0.75	0	22.6066	22.2205	22.2462	23.0074	22.2126	22.4543	23.6935	22.0456	22.8346
225	12	29.6908	1.8382	1505.49	101	0.75	0	22.1501	22.487	29.138	21.4404	25.3973	37.9843	27.4932	35.1512	35.326
225	13	30.78	2.05509	2006.94	101	0.75	0	23.8852	43.1603	63.1632	22.9521	34.1077	85.8528	45.2148	98.4935	125.655
225	14	30.8658	2.06021	1952.66	101	0.75	0	23.5947	44.0357	64.9635	23.3863	34.8754	85.9579	47.3267	101.089	128.483
225	15	30.1417	1.85574	1388.58	101	0.75	0	23.494	44.5834	65.1909	22.4171	33.4011	82.9754	46.3235	102.775	125.931
225	16	28.6017	1.46431	432.78	101	0.75	0	23.1865	35.2212	49.1699	22.4639	28.3382	47.8394	35.1863	61.858	75.806
225	17	24.8192	0.720005	16.333	101	0.75	0	23.0539	22.0844	21.8801	21.8789	21.5831	22.5508	24.795	21.0421	21.761
225	18	24.0142	0.555271	1.22609	101	0.75	0	20.5191	19.9021	19.606	20.3923	19.7654	19.8599	21.6035	19.654	19.6612
225	19	22.4042	0.303748	1.0418	101	0.75	0	8.71105	8.52224	7.32933	8.39185	8.07154	8.17229	9.50327	7.64888	7.65589
225	20	21.055	0.193933	1.06674	101	0.75	0	3.91994	3.80528	3.71864	4.14973	3.99085	2.80002	4.74766	3.33158	2.94552
225	21	20.3325	0.155468	1.08125	101	0.75	0	2.79434	2.41505	2.33539	1.71693	1.89973	1.69314	2.40554	2.25054	1.5347
225	22	19.8717	0.135856	1.08988	101	0.75	0	1.41568	1.28861	1.3072	0.580678	1.22146	1.05819	1.48824	1.62621	0.666446
225	23	20.65	0.130527	1.07707	101	0.75	0	0.24984	0.683506	0.509566	1.12117	0.484683	0.452039	0.320439	0.390371	0.348635
226	0	21.24	0.141573	1.06528	101	0.75	0	1.18044	0.781301	0.608145	0.818608	1.15084	-0.210195	0.212965	0.412608	0.285346
226	1	21.4283	0.153946	1.06168	101	0.75	0	1.93765	3.06202	2.96935	2.9212	3.38022	2.35502	2.41663	1.45516	1.89835
226	2	21.4217	0.161282	1.0615	101	0.75	0	1.28217	2.28452	2.52057	1.80371	1.56615	1.77768	1.96643	1.56805	1.27196
226	3	21.3025	0.157007	1.06222	101	0.75	0	0.848515	0.666698	0.863279	1.007	1.74167	2.38	0.676457	0.45537	0.127638
226	4	21.2408	0.142827	1.06402	101	0.75	0	2.44423	1.38034	1.33385	1.43258	2.46139	1.88368	1.07236	1.24733	2.1385
226	5	21.2025	0.123187	1.0669	101	0.75	0	1.73284	1.28903	0.961588	1.40345	1.4386	1.99144	1.31536	1.40812	2.04956
226	6	21.2008	0.122888	1.26545	101	0.75	0	1.4191	0.533837	0.957807	1.0905	1.5933	0.805392	0.748658	0.619578	1.34722
226	7	23.0425	0.329018	120.823	101	0.75	0	5.96894	7.68424	7.51955	5.33419	5.22817	5.29298	5.17142	4.5982	5.51469
226	8	27.1208	1.09362	451.239	101	0.75	0	14.5827	34.8187	54.9785	15.0356	25.4717	69.7688	33.6914	84.6547	103.261
226	9	26.4217	1.00888	502.967	101	0.75	0	14.8344	20.4131	27.0346	14.7954	19.1048	29.51	17.7692	26.1189	34.7423
226	10	29.595	1.62403	1154.12	101	0.75	0	17.3524	16.8983	17.1257	16.0655	16.179	17.1783	17.4999	16.0714	17.0366
226	11	29.5042	1.66003	1102.16	101	0.75	0	18.0161	17.6097	17.3055	17.3024	17.2187	18.0253	18.153	16.83	17.8491
226	12	29.9542	1.84384	1343.42	101	0.75	0	18.6735	17.0494	18.2887	18.0792	18.085	18.7233	18.1038	17.6202	18.4372
226	13	31.7858	2.25675	1974.62	101	0.75	0	18.5114	20.3717	21.1493	18.4244	18.8419	19.0195	18.9273	37.7272	36.7286
226	14	31.5183	2.25021	1895.7	101	0.75	0	19.7022	39.356	57.3932	19.1495	29.6513	73.9654	37.427	101.655	125.384
226	15	30.1775	1.97208	1170.58	101	0.75	0	20.1328	39.454	59.8367	18.8605	29.9351	82.0731	40.5137	92.9592	118.824
226	16	27.6775	1.4071	354.134	101	0.75	0	19.9754	31.5833	44.0738	19.5221	25.5748	43.1484	30.373	57.1961	69.1638
226	17	25.2125	0.918543	48.0221	101	0.75	0	12.7013	12.4556	13.412	13.5859	13.6375	13.1116	15.2354	13.261	13.3498
226	18	21.99	0.357227	1.49822	101	0.75	0	5.58165	5.99256	6.54007	6.24462	7.09431	6.5091	7.7939	6.12055	5.85644
226	19	20.6458	0.21993	1.07471	101	0.75	0	3.07955	4.25458	4.10801	5.68526	4.89788	4.35423	4.67222	4.1338	4.25747
226	20	19.8842	0.17056	1.08915	101	0.75	0	2.13751	2.60565	2.17964	2.69813	1.78569	1.69836	2.59396	2.11541	1.80735
226	21	19.3158	0.142173	1.09895	101	0.75	0	2.55532	1.96447	2.00382	2.22963	1.63284	1.85789	2.08254	1.69292	1.70985
226	22	18.8383	0.123905	1.1081	101	0.75	0	2.74834	1.89584	1.55729	1.77155	1.77928	1.17004	2.37342	1.73996	1.99071
226	23	18.5267	0.111109	1.11336	101	0.75	0	1.90677	1.60843	1.25363	1.32644	1.88819	1.3528	1.44832	1.63733	1.33799
227	0	18.3267	0.10465	1.11675	101	0.75	0	1.21087	0.970068	0.920446	1.09096	0.802475	1.10977	1.54109	0.983059	0.954836
227	1	17.8117	0.0990931	1.12528	101	0.75	0	0.881285	0.812099	0.0988658	0.553085	0.835785	0.74746	1.30767	0.020903	0.437239
227	2	17.3092	0.0910909	1.13388	101	0.75	0	0.554129	0.451409	0.00766913	0.263425	0.428974	0.125964	0.948228	0.794049	0.265847
227	3	16.9142	0.0874812	1.13946	101	0.75	0	0.119392	0.150244	0.327713	-0.0195368	-0.192549	0.355081	-0.00353014	-0.150147	-0.282198
227	4	16.5775	0.0802313	1.14525	101	0.75	0	0.211309	-0.0369839	0.176288	-0.329704	0.418243	0.0699673	0.068833	0.335635	0.405081
227	5	16.295	0.0773618	1.1503	101	0.75	0	0.241828	-0.308881	0.326902	-0.296827	0.193249	0.137307	0.527103	0.051692	-0.14741
227	6	16.2767	0.0711325	2.23111	101	0.75	0	1.25552	0.754707	0.841313	0.393882	0.260895	0.78095	-0.159222	0.599052	0.1964
227	7	18.175	0.184635	96.3385	101	0.75	0	2.42722	3.82373	3.50285	1.25037	1.1344	0.705418	1.11798	0.364713	0.865206
227	8	23.7983	0.760811	372.553	101	0.75	0	14.4832	37.2828	54.825	12.1142	23.2923	69.0746	35.5254	87.8448	100.616
227	9	27.2592	1.43785	1227.28	101	0.75	0	17.8662	38.1424	57.5029	18.5767	29.427	78.3679	38.683	99.8679	118.516
227	10	28.1275	1.62671	922.058	101	0.75	0	21.6659	25.5318	33.5621	19.9376	24.5943	37.61	24.4818	32.322	38.2978
227	11	29.2967	1.892	1261.49	101	0.75	0	20.4793	20.4955	20.4346	19.7433	19.5145	20.2555	21.0063	19.3726	20.4867
227	12	30.7458	2.21769	1719.9	101	0.75	0	20.4545	19.9572	19.4898	20.2037	19.682	21.2916	21.856	19.9859	20.5671
227	13	31.7017	2.45509	2042.34	101	0.75	0	20.4975	20.0794	19.7686	19.182	19.3736	20.9587	20.2946	19.7028	19.6821
227	14	31.8383	2.49524	1979.85	101	0.75	0	20.333	28.4266	34.9222	20.1894	22.7941	34.9225	24.593	33.6733	60.8689
227	15	30.7675	2.24735	1464.13	101	0.75	0	21.9675	41.5636	60.9838	21.5319	32.8683	77.4207	42.883	99.6438	125.641
227	16	28.3383	1.70044	497.091	101	0.75	0	20.9528	32.1158	47.1955	20.8982	27.5235	45.0432	31.4773	58.9442	71.9748
227	17	25.0325	1.03775	50.9993	101	0.75	0	18.4359	18.5669	19.4302	19.0684	18.2882	19.6734	21.19	18.5336	19.4833
227	18	22.3475	0.586252	1.56313	101	0.75	0	11.4488	12.2184	10.943	12.8634	12.8194	11.9635	13.7685	11.9055	11.6557
227	19	19.8217	0.235518	1.08256	101	0.75	0	5.80896	5.64475	4.99	6.1363	6.10413	6.01621	6.38009	6.05384	5.28309
227	20	18.9642	0.159926	1.10007	101	0.75	0	4.13664	4.47164	3.66715	4.35564	3.97999	3.79818	4.53504	3.72499	3.69779
227	21	18.5542	0.1307	1.10885	101	0.75	0	4.15815	3.8126	3.19352	3.83401	3.87223	4.18408	4.27859	3.30335	3.06833
227	22	18.2208	0.115781	1.11392	101	0.75	0	5.11448	4.55907	4.24444	4.21463	4.35116	4.04014	4.58927	3.90146	2.97023
227	23	18.1333	0.105687	1.11694	101	0.75	0	4.02709	3.77327	3.85511	4.32196	4.94209	4.2238	4.43887	3.50234	3.33856
228	0	17.9717	0.0958201	1.12035	101	0.75	0	4.11329	3.94318	3.09032	3.47092	3.65584	3.02885	3.61482	3.36094	3.54125
228	1	18.3758	0.0914672	1.11206	101	0.75	0	2.41449	2.54883	1.70888	1.42918	1.48784	2.00255	1.36325	1.7716	1.3176
228	2	18.8433	0.103282	1.10286	101	0.75	0	0.544534	0.655348	0.665109	1.10488	0.645911	0.67841	0.67604	0.244978	0.436127
228	3	17.94	0.0936084	1.11808	101	0.75	0	1.38752	1.03876	0.46402	0.922532	1.10024	0.60984	0.995775	0.329933	0.322236
228	4	17.2583	0.0831841	1.13082	101	0.75	0	0.75422	0.635723	0.249615	0.958722	0.687135	0.204197	0.706206	0.399209	0.951843
228	5	16.8517	0.0765722	1.13772	101	0.75	0	0.454695	0.24879	0.419682	0.123503	0.269061	0.454695	-0.0113639	-0.0700386	0.418737
228	6	16.885	0.0724295	2.3376	101	0.75	0	1.05648	0.54166	0.119564	0.252166	0.0434396	0.28282	0.223312	0.682011	0.498703
228	7	18.7408	0.193407	98.8647	101	0.75	0	0.984725	2.86359	3.03825	0.217385	0.494659	0.778114	0.623764	0.274627	0.393079
228	8	23.9808	0.721543	334.585	101	0.75	0	11.0216	34.2888	53.0508	8.36268	17.7018	62.2316	27.2599	80.3055	99.5234
228	9	27.6408	1.42765	1323.46	101	0.75	0	16.334	37.1015	58.0285	15.4628	28.4582	80.363	37.0464	101.885	130.142
228	10	29.88	1.92813	1777.75	101	0.75	0	20.1416	41.7145	63.5067	20.0526	32.4075	85.3681	44.6224	105.43	129.837
228	11	29.86	1.93076	1946.01	101	0.75	0	20.9161	41.3749	62.1728	20.5828	32.4699	82.9675	46.3666	105.412	132.964
228	12	29.6225	1.87846	1983.7	101	0.75	0	20.9277	41.8378	62.3606	21.1326	32.8523	82.0488	45.927	106.095	130.645
228	13	29.9525	1.91829	2005.61	101	0.75	0	20.7776	41.595	65.0362	20.6984	31.3455	81.4385	46.4704	103.829	128.651
228	14	30.2375	2.00609	1927	101	0.75	0	20.0383	40.4418	63.0598	20.3962	32.678	80.0442	45.6174	104.604	129.877
228	15	30.3575	2.03903	1387.73	101	0.75	0	21.2448	41.4965	61.8547	21.0799	33.4396	84.7129	46.3794	103.664	125.572
228	16	27.0608	1.30459	298.187	101	0.75	0	20.6916	33.8465	49.5038	19.519	26.3992	47.0518	33.8022	62.2771	79.9129
228	17	24.2592	0.760429	26.8683	101	0.75	0	12.6281	12.568	13.0788	14.264	13.9901	13.0762	15.3932	12.2407	12.2585
228	18	21.4017	0.320759	1.45172	101	0.75	0	4.58569	3.82975	3.79175	5.35369	6.35715	5.43036	7.18536	4.83938	4.98409
228	19	20.4133	0.213512	1.07306	101	0.75	0	3.06235	2.86939	2.48402	2.34667	3.07323	3.54287	4.11456	3.12118	3.47132
228	20	20.4125	0.18367	1.07578	101	0.75	0	3.22305	3.25814	2.53048	2.11951	2.31908	3.47953	3.98939	2.79277	2.45289
228	21	20.55	0.17454	1.07342	101	0.75	0	3.46369	2.68629	2.63338	3.73257	2.45039	2.64098	3.39039	1.96916	2.47479
228	22	19.8625	0.150435	1.08492	101	0.75	0	3.68281	3.19149	2.66399	2.47047	2.48141	2.04114	2.63847	2.10429	2.8576
228	23	19.8708	0.137794	1.08584	101	0.75	0	1.44836	1.37929	1.72123	1.85727	1.42758	1.3456	1.87102	1.76561	1.61748
229	0	19.0492	0.120449	1.09989	101	0.75	0	1.50598	1.8425	1.43585	2.15833	1.84764	0.839422	1.5549	1.36878	1.46662
229	1	17.9742	0.123905	1.11657	101	0.75	0	3.53301	4.27139	4.33559	4.10428	2.18474	2.55663	4.03858	4.16031	4.11139
229	2	17.7258	0.110248	1.12225	101	0.75	0	2.50653	3.80905	2.85016	3.83985	3.04138	3.22823	3.36002	2.78764	2.57502
229	3	17.7583	0.121283	1.12168	101	0.75	0	2.2189	2.85105	2.87348	2.81358	3.16316	2.81883	3.94684	2.72349	2.26063
229	4	17.3767	0.0965022	1.12948	101	0.75	0	1.96169	2.63123	2.08053	2.31397	2.04866	1.39484	1.90141	1.90331	1.34175
229	5	17.2808	0.0855597	1.13101	101	0.75	0	0.853556	0.510574	0.399734	0.602977	1.30657	0.787837	0.465759	0.416884	0.267215
229	6	17.035	0.0822211	2.37816	101	0.75	0	-0.26295	0.300795	0.0912136	-0.413816	0.0922579	-0.551619	-0.227588	-0.273303	-0.307171
229	7	19.005	0.231668	106.759	101	0.75	0	1.43738	2.7568	2.83107	0.382764	0.294529	0.963884	0.299859	-0.351986	-0.839479
229	8	24.6008	0.841964	336.791	101	0.75	0	9.32845	31.7384	53.4692	7.85377	19.138	64.8167	30.85	83.7713	100.838
229	9	27.9025	1.71829	1362.35	101	0.75	0	16.0308	37.8245	60.0459	15.7297	27.7642	79.6831	37.1675	99.7696	125.691
229	10	30.33	2.4605	1788.23	101	0.75	0	20.801	41.5644	62.4659	21.0104	31.4051	78.513	43.47	103.305	130.871
229	11	31.2783	2.69658	1945.14	101	0.75	0	24.3538	45.0906	65.1563	23.9245	35.5793	83.3281	47.287	110.316	138.503
229	12	31.3133	2.62628	2013.08	101	0.75	0	25.9721	46.1529	64.9721	25.236	37.2338	85.8176	50.7159	108.219	132.916
229	13	31.0567	2.61927	2017.86	101	0.75	0	27.8052	47.4309	67.7014	27.1677	39.2266	87.3119	52.9967	106.647	134.43
229	14	30.7308	2.56788	1920.48	101	0.75	0	28.9889	48.3733	66.2301	28.6719	40.0102	87.2647	52.5775	112.59	128.771
229	15	30.4183	2.56493	1416.52	101	0.75	0	28.8058	47.4168	66.6374	27.7002	40.1535	86.5241	52.7371	107.839	125.947
229	16	28.8858	2.28296	491.936	101	0.75	0	27.2673	39.5156	54.7999	26.9398	34.1288	51.4643	39.3968	65.2021	78.6998
229	17	24.5225	1.44364	49.554	101	0.75	0	23.5947	22.3541	22.8095	23.8496	22.8373	22.444	24.9614	21.6955	21.2314
229	18	19.6917	0.586069	1.48686	101	0.75	0	14.8013	14.1017	15.2745	14.8352	13.7884	14.4137	16.7392	13.4073	13.1374
229	19	17.3858	0.311817	1.12056	101	0.75	0	11.8815	12.1837	11.115	11.6834	11.4126	11.0261	12.2885	11.0998	12.0929
229	20	16.2392	0.226445	1.1414	101	0.75	0	11.4018	11.1503	10.929	11.3581	10.4813	11.2924	12.1935	11.6668	10.546
229	21	15.4908	0.186969	1.15615	101	0.75	0	11.3986	11.1215	10.66	11.4938	10.9969	11.4159	12.256	11.6908	10.9554
229	22	14.9858	0.159901	1.16656	101	0.75	0	11.8292	11.5953	11.2552	10.7851	11.3086	10.6299	12.0667	11.9944	11.8131
229	23	14.5442	0.135594	1.17468	101	0.75	0	10.3839	10.6658	9.44351	10.0519	10.3482	8.53217	10.2444	10.3044	9.48476
230	0	14.1683	0.112607	1.18125	101	0.75	0	10.1538	9.56001	9.64418	10.1367	10.0328	10.1525	10.5837	10.3797	10.1604
230	1	14.01	0.0975368	1.18505	101	0.75	0	8.95259	8.52186	8.114	8.8436	8.48415	9.04073	8.91651	9.92128	9.25931
230	2	13.9567	0.0848574	1.18746	101	0.75	0	8.50174	8.03955	7.89722	7.80022	8.02532	7.43448	8.25304	8.53663	8.13278
230	3	13.76	0.0795081	1.19068	101	0.75	0	6.91053	5.89459	5.62675	6.02841	6.23203	5.95742	6.40813	6.69869	6.8523
230	4	13.405	0.0759822	1.19512	101	0.75	0	4.66266	4.24299	4.37863	3.85626	3.96546	3.23687	4.29582	4.27406	4.20171
230	5	13.3692	0.0685528	1.19674	101	0.75	0	4.0232	3.54989	3.18155	4.26941	3.86881	3.42835	3.2959	3.01171	2.71973
230	6	13.4683	0.0642905	2.50162	101	0.75	0	4.42904	3.93216	3.19118	3.5025	3.36423	2.63594	4.00729	3.2777	2.91302
230	7	15.7925	0.198735	108.886	101	0.75	0	3.97585	5.60182	5.26647	3.06896	3.69934	3.06051	3.35605	2.3087	2.11969
230	8	21.9375	0.746171	333.937	101	0.75	0	8.77722	33.5106	53.4948	9.26801	22.1381	44.1342	30.5463	83.064	103.387
230	9	26.2058	1.44575	1310.46	101	0.75	0	17.5625	39.449	59.193	17.8592	31.3523	82.4027	39.9442	107.7	132.676
230	10	29.3667	2.14966	1733.76	101	0.75	0	27.168	47.868	69.8874	26.4474	39.5868	90.3669	51.4272	114.228	137.597
230	11	29.5333	2.22371	1879.75	101	0.75	0	27.9853	49.2534	71.1363	28.005	40.4856	90.6217	54.0592	114.079	140.787
230	12	29.4217	2.20089	1937.26	101	0.75	0	28.4732	49.2417	71.4396	27.8922	41.7695	89.5139	54.0861	113.419	138.991
230	13	29.975	2.31111	1971.65	101	0.75	0	27.8813	49.6637	70.6095	28.0318	40.6679	89.5626	53.9815	111.925	138.894
230	14	29.985	2.35652	1907.58	101	0.75	0	26.6505	47.8778	71.347	26.7429	40.2285	92.2231	52.8711	113.061	143.912
230	15	29.3767	2.19492	1405.65	101	0.75	0	26.398	48.0471	70.5746	26.2236	37.9772	89.5093	51.4395	110.63	134.754
230	16	28.12	1.90711	419.342	101	0.75	0	25.6979	37.9734	55.0018	26.4722	32.9102	52.4421	39.406	68.4982	83.8443
230	17	23.1217	0.900849	49.9992	101	0.75	0	17.5481	16.3323	16.4423	17.826	16.702	15.3466	18.2692	16.375	17.5672
230	18	19.2842	0.326973	1.61362	101	0.75	0	10.8713	10.4791	9.73402	11.2292	10.527	10.0026	11.697	10.5661	11.263
230	19	17.6142	0.185994	1.11771	101	0.75	0	10.0285	9.62026	8.27938	9.19603	9.93123	8.22842	9.785	8.83169	9.40539
230	20	16.7633	0.150516	1.13408	101	0.75	0	8.79327	8.47636	8.42051	9.0886	8.34669	7.67691	9.31605	9.03723	8.89481
230	21	16.2333	0.125516	1.14429	101	0.75	0	8.85415	8.56809	7.87009	9.00961	8.07418	8.45376	9.53644	9.1507	8.35061
230	22	16.005	0.108118	1.15011	101	0.75	0	8.98476	8.50111	7.00965	8.66942	8.01512	7.81405	9.12093	9.50306	8.33693
230	23	15.4358	0.100487	1.15929	101	0.75	0	7.44062	7.19858	6.63107	6.84712	6.97505	7.63549	8.04591	7.63263	7.38959
231	0	15.0008	0.0899709	1.16735	101	0.75	0	6.69907	6.2577	6.6563	6.17095	5.86158	5.82446	6.47941	6.61346	6.01264
231	1	14.6242	0.083484	1.17349	101	0.75	0	6.33383	5.7616	4.77858	6.2294	6.40144	5.45161	6.46349	5.62992	5.4305
231	2	14.3842	0.0781027	1.17806	101	0.75	0	6.3662	7.30166	5.99389	7.30604	7.28325	8.0734	9.57238	8.241	7.19075
231	3	14.2092	0.0771658	1.18125	101	0.75	0	5.58229	5.08314	4.36146	5.57836	5.35893	5.36383	5.65799	5.80866	4.99703
231	4	13.8	0.0715618	1.18726	101	0.75	0	3.45317	3.7991	1.98661	3.23519	3.03668	2.82269	3.99004	3.57076	2.58651
231	5	13.6475	0.0641161	1.19068	101	0.75	0	2.77835	2.98644	2.30384	2.59611	2.46303	2.05769	2.86348	2.80816	2.92248
231	6	13.6675	0.0621659	2.59453	101	0.75	0	1.99192	2.08798	1.34673	2.24116	2.07042	2.01655	2.0303	2.0296	1.66743
231	7	15.9517	0.177123	114.921	101	0.75	0	4.07713	4.9915	5.83084	2.91498	3.61117	3.12897	2.7879	1.79726	2.32974
231	8	21.7	0.643708	309.473	101	0.75	0	12.2744	34.4415	58.1521	12.772	25.2633	24.5425	35.9663	92.3272	116.671
231	9	26.05	1.34018	1321.92	101	0.75	0	16.2721	39.1318	59.6896	16.8136	29.9242	82.4971	38.9956	105.868	136.276
231	10	28.8833	1.96756	1730.44	101	0.75	0	26.1527	46.7028	68.575	24.7797	39.3863	88.2577	49.494	109.608	137.3
231	11	29.285	2.04417	1876.56	101	0.75	0	26.0083	46.7681	66.8822	26.3038	37.4493	87.4869	51.412	109.808	134.974
231	12	29.5992	2.07021	1941.55	101	0.75	0	26.3628	47.0451	68.1989	25.6003	38.3462	89.1534	51.9756	107.026	131.258
231	13	29.6792	2.08966	1967.98	101	0.75	0	25.5585	45.8475	68.2232	25.802	37.1546	85.2941	51.0926	109.034	130.487
231	14	29.8783	2.13276	1890.62	101	0.75	0	25.5908	44.7267	67.9957	25.2057	37.1073	85.9394	51.2702	110.204	135.208
231	15	29.3567	2.0023	1396.38	101	0.75	0	26.0065	45.6075	67.2685	24.767	37.6227	86.2552	50.4313	108.426	135.741
231	16	26.9775	1.49232	331.045	101	0.75	0	25.0704	36.9051	52.3932	24.534	32.2062	52.1209	38.0736	65.2842	77.2041
231	17	23.6408	0.846071	39.4637	101	0.75	0	16.8745	17.251	17.171	17.6729	17.6918	18.3911	21.2068	16.9472	17.3476
231	18	20.7108	0.371947	1.56422	101	0.75	0	10.8466	9.78297	10.3007	9.9908	10.2707	10.0536	12.6041	9.33115	9.62639
231	19	19.1533	0.225501	1.09119	101	0.75	0	9.8777	8.25276	7.64262	8.7471	8.43203	9.79078	9.70275	9.08997	8.78722
231	20	18.1717	0.168229	1.11017	101	0.75	0	9.62221	8.18464	6.58328	7.89659	7.55503	7.35377	7.90955	8.53321	7.56079
231	21	17.5225	0.131018	1.1211	101	0.75	0	6.63235	5.6827	4.87071	5.45351	5.59364	5.04437	6.33279	5.2174	5.68232
231	22	17.3242	0.116382	1.12643	101	0.75	0	5.88585	5.98796	4.90726	5.58577	5.36663	5.67811	6.90361	5.23194	4.6136
231	23	17.1158	0.107693	1.12948	101	0.75	0	5.71237	5.02881	5.31391	5.32537	4.93504	4.39015	4.8259	4.58281	4.87735
232	0	16.7175	0.0958715	1.13695	101	0.75	0	4.10018	4.16278	3.6396	4.86491	3.3887	3.93466	5.45811	4.0286	3.44053
232	1	16.9667	0.09236	1.13292	101	0.75	0	4.87251	3.96426	3.1757	3.34618	3.59408	3.35998	4.14164	4.63156	3.27633
232	2	17.2925	0.0985469	1.12719	101	0.75	0	4.23008	4.29363	4.81525	4.50108	3.97659	4.0724	4.38	4.24926	3.71421
232	3	16.625	0.0937003	1.13946	101	0.75	0	5.16555	4.61929	4.40284	4.77797	4.548	5.66569	5.42949	4.39123	3.68822
232	4	15.8317	0.0812095	1.15166	101	0.75	0	4.03212	3.83128	2.97197	4.153	3.28392	3.68849	3.90529	3.65144	2.96638
232	5	15.4492	0.0763694	1.16046	101	0.75	0	3.2217	3.11046	2.88653	2.82989	2.7574	3.55943	3.24764	3.03566	2.33829
232	6	14.8242	0.07409	2.67579	101	0.75	0	1.62139	1.85409	1.71502	1.47829	1.89334	1.90466	1.99956	2.43613	1.7899
232	7	17.125	0.198684	119.17	101	0.75	0	4.06525	4.54281	4.79698	2.13236	3.68562	3.99993	2.35597	2.00252	1.94522
232	8	23.1875	0.781075	289.278	101	0.75	0	13.3434	34.8894	58.8605	10.7359	28.4119	11.7587	37.551	86.7031	111.764
232	9	26.695	1.45149	1337.67	101	0.75	0	18.2564	17.5459	19.8948	17.4579	19.2227	18.5625	21.5175	17.7699	17.7865
232	10	29.6458	1.99641	1753.6	101	0.75	0	20.6046	19.6475	21.0258	20.0824	19.1875	20.5414	21.0921	19.4915	19.9304
232	11	29.21	1.8117	1880.91	101	0.75	0	22.0742	21.7772	22.0619	21.6079	21.4866	21.8558	22.5209	21.6502	22.0371
232	12	29.2467	1.82409	1929.12	101	0.75	0	23.1449	22.7483	23.2198	22.2511	22.7697	23.5728	22.8632	22.3754	22.5294
232	13	29.8317	1.96404	1949.09	101	0.75	0	23.9237	23.3087	23.4898	23.7861	23.0769	23.5229	23.898	23.4351	24.0777
232	14	30.0125	1.98225	1896.96	101	0.75	0	24.0635	23.4554	23.1759	23.573	23.2807	23.4083	23.9127	23.1905	23.4609
232	15	29.58	1.88285	1420.76	101	0.75	0	23.3851	22.3641	23.5234	23.1064	22.9055	23.7907	23.1677	22.1667	23.5139
232	16	28.395	1.6813	466.78	101	0.75	0	23.179	28.9173	37.7259	22.9422	25.6976	23.6175	23.3228	22.4892	23.4561
232	17	24.4575	0.989175	57.0893	101	0.75	0	19.14	19.8863	19.8583	19.2811	17.9181	18.7415	18.0612	19.2546	18.3003
232	18	20.5525	0.35618	1.68224	101	0.75	0	10.9277	11.3344	11.2385	10.2283	11.214	10.817	12.1692	11.0605	11.237
232	19	18.8517	0.190601	1.09674	101	0.75	0	6.64243	6.93984	6.02755	7.54917	7.4998	5.93023	6.44259	6.43015	6.17494
232	20	18.1542	0.142297	1.11148	101	0.75	0	5.02934	6.56982	5.54843	6.17213	7.17139	5.02925	5.72486	5.21997	5.10075
232	21	17.7	0.119066	1.12111	101	0.75	0	5.64926	5.28341	6.68447	5.16105	5.75092	5.04851	5.51985	4.09189	4.63686
232	22	17.255	0.105733	1.1291	101	0.75	0	4.87314	4.47845	3.99061	3.90425	3.85966	3.49484	4.21226	4.28775	4.25918
232	23	16.8892	0.0927795	1.13561	101	0.75	0	3.47917	4.16103	2.65831	3.72516	3.23279	2.99537	3.96951	2.94329	3.05122
233	0	16.4933	0.0842042	1.14235	101	0.75	0	3.59423	3.38524	2.30811	3.1506	2.24643	2.60434	2.29428	2.79875	2.35676
233	1	16.255	0.0781762	1.147	101	0.75	0	3.12132	4.27074	3.18551	2.78527	2.53302	2.26742	2.84344	2.40448	3.15693
233	2	15.89	0.0797842	1.15244	101	0.75	0	2.8038	3.05719	1.79289	1.88651	1.89547	1.68004	1.7924	2.28817	1.8313
233	3	15.4408	0.071872	1.16066	101	0.75	0	2.15336	1.93778	1.67388	2.42949	1.607	2.34511	2.17257	2.0239	1.93222
233	4	15.3142	0.0678542	1.1636	101	0.75	0	2.44405	2.94948	2.08025	2.44293	2.18123	2.20085	2.0699	2.63284	2.53363
233	5	15.2258	0.0668076	1.16617	101	0.75	0	5.48721	6.05887	5.70111	4.65262	4.38693	4.39537	4.49869	5.33372	4.46307
233	6	16.075	0.130422	2.68431	101	0.75	0	7.31988	7.90204	7.41179	7.06118	6.49664	7.62493	7.78285	7.81993	6.57793
233	7	18.1517	0.296444	122.487	101	0.75	0	6.65305	8.46451	8.64038	5.65819	7.81718	7.13384	6.73609	7.08612	7.59226
233	8	23.6617	0.986226	346.414	101	0.75	0	12.9313	36.5891	55.7782	12.9536	27.5609	48.3769	33.5889	91.4018	113.794
233	9	27.5567	1.69632	1364.02	101	0.75	0	17.5825	37.1576	55.0072	16.4048	29.6381	78.9908	37.2906	95.9705	127.442
233	10	31.6892	2.64438	1798.76	101	0.75	0	20.2641	42.6907	60.9327	19.8662	33.9144	82.238	43.2095	105.294	134.958
233	11	33.2775	2.82844	1993.87	101	0.75	0	22.9018	43.2694	64.0566	22.302	35.2178	85.126	46.0216	107.791	133.698
233	12	31.4925	2.17369	2013.77	101	0.75	0	25.1797	45.5539	63.3364	24.769	37.8471	85.0794	49.5818	108.184	132.662
233	13	32.65	2.5546	2040.25	101	0.75	0	26.7606	47.2463	67.5358	26.28	39.3833	89.5685	51.5138	111.483	138.729
233	14	33.98	3.02168	2033.61	101	0.75	0	26.0512	47.5741	66.4497	26.4587	39.0095	88.6222	50.2068	113.406	141.975
233	15	32.8233	2.62213	1528.66	101	0.75	0	25.6337	44.7157	64.3461	24.8639	37.1269	84.5648	49.0434	107.99	137.897
233	16	30.5117	2.02204	512.289	101	0.75	0	22.8919	36.0533	50.0875	22.958	31.785	49.8133	35.4944	64.8566	79.0665
233	17	25.4008	0.907283	58.459	101	0.75	0	12.6671	12.4333	12.4597	12.2032	12.2465	12.8707	14.8309	11.8425	13.4305
233	18	21.4683	0.316367	1.60821	101	0.75	0	8.3353	8.81124	7.26733	7.57497	8.05112	7.61539	9.48738	7.27969	6.72991
233	19	19.7692	0.22413	1.07927	101	0.75	0	10.1439	9.26432	8.75543	9.66301	9.32047	8.60718	9.4347	8.99504	10.0735
233	20	18.8358	0.173005	1.09784	101	0.75	0	7.83175	7.38365	7.71842	7.98049	7.2754	7.40683	7.95026	7.72214	7.17108
233	21	18.4817	0.129435	1.10716	101	0.75	0	6.03801	6.9436	5.70263	6.01185	6.14454	5.75417	6.53831	6.31697	5.53342
233	22	17.6133	0.142899	1.1196	101	0.75	0	9.21339	9.12166	7.17676	8.28505	8.3863	8.22944	9.20357	9.57319	9.23366
233	23	16.4558	0.137794	1.13811	101	0.75	0	8.51614	8.41724	7.86466	8.40562	8.8289	8.63614	8.88747	8.62956	8.68045
234	0	15.9858	0.116349	1.14758	101	0.75	0	8.13491	7.95423	7.19178	8.04048	8.27119	8.07827	7.83276	7.65458	7.86754
234	1	15.4542	0.115526	1.15615	101	0.75	0	8.6056	8.38652	7.72858	7.37664	8.43794	8.44371	8.37036	8.59051	7.6533
234	2	15.1717	0.104508	1.16203	101	0.75	0	7.64123	7.86062	6.87846	7.96961	7.65261	7.92268	7.85956	7.71958	8.07579
234	3	14.8867	0.0918912	1.16755	101	0.75	0	7.86709	7.38348	7.01387	8.08287	7.40072	5.96031	7.67043	7.24919	6.56493
234	4	14.5808	0.0817029	1.17249	101	0.75	0	6.92538	7.261	6.12091	6.91527	6.77471	5.76323	7.19418	7.27257	6.57383
234	5	14.4583	0.0735831	1.17448	101	0.75	0	6.76964	6.35617	6.00747	6.48254	6.88307	5.96395	6.97927	6.82955	6.28578
234	6	14.4083	0.0692476	2.91948	101	0.75	0	5.63927	4.96671	5.26926	5.20465	5.36285	5.17324	5.27216	5.14813	4.7518
234	7	16.9642	0.204585	134.345	101	0.75	0	3.93075	6.3693	6.98381	3.30226	4.49303	2.25212	3.12984	3.6044	4.18905
234	8	23.2592	0.855961	422.052	101	0.75	0	6.4242	29.5515	45.544	4.18963	17.7265	36.5329	28.2845	48.044	119.337
234	9	27.4867	1.65429	1352.88	101	0.75	0	15.4461	15.1997	16.5252	14.9673	16.3342	22.0161	18.4997	27.5959	33.7154
234	10	30.8075	2.45876	1791.37	101	0.75	0	23.3782	23.0426	23.1575	22.9121	22.9443	23.6005	23.8565	23.0836	23.3696
234	11	31.5283	2.46339	1956.71	101	0.75	0	24.7112	23.948	24.7112	24.2615	23.8541	24.7838	25.6805	24.1697	24.8628
234	12	31.1925	2.34442	2016.16	101	0.75	0	26.3188	24.6718	26.1896	26.0844	25.6364	26.0788	25.7694	25.4022	25.4967
234	13	30.915	2.24924	2039.47	101	0.75	0	29.6796	28.1409	27.2835	27.1391	28.2776	29.5614	27.2696	27.4197	28.785
234	14	30.73	2.07663	1958.42	101	0.75	0	29.9773	37.1174	42.6187	28.5719	31.8457	67.4884	40.9745	70.2728	83.3366
234	15	30.0425	1.85793	1337.22	101	0.75	0	29.5247	48.1329	71.5766	28.5211	39.5855	89.7712	50.4179	111.041	134.097
234	16	28.1475	1.45313	403.024	101	0.75	0	27.6716	38.1583	55.2538	25.1497	33.0018	53.0236	37.6002	67.9577	82.3657
234	17	24.6208	0.830531	29.0562	101	0.75	0	19.0616	20.2967	20.2607	21.0532	20.0925	20.9771	21.6027	19.8567	19.7029
234	18	21.5575	0.339305	1.60063	101	0.75	0	11.0502	12.2122	9.46952	11.2828	10.5855	11.6457	12.4797	11.1648	9.7622
234	19	20.1217	0.194198	1.07398	101	0.75	0	6.27809	7.03013	5.10577	5.7099	6.65559	5.60681	6.63226	5.79042	5.7456
234	20	19.4367	0.141343	1.08896	101	0.75	0	3.9952	3.67155	3.2695	3.69079	3.30472	4.41194	4.14582	3.34013	3.84421
234	21	18.7275	0.12481	1.0997	101	0.75	0	5.66618	5.16798	4.08757	4.78618	4.65146	4.12061	5.97487	5.61851	5.18388
234	22	17.9133	0.11442	1.11317	101	0.75	0	6.35083	5.22407	4.5784	5.68638	5.35948	4.8717	5.85074	4.95484	5.54377
234	23	17.3125	0.106759	1.12339	101	0.75	0	5.90493	5.11502	3.70244	4.75351	4.47164	4.22441	4.78625	5.13444	4.80483
235	0	16.7958	0.0962197	1.13254	101	0.75	0	4.09225	4.21162	2.89796	4.0772	4.64548	4.16815	4.29858	3.9542	4.34813
235	1	16.5192	0.0882482	1.13888	101	0.75	0	4.96947	5.44159	4.007	5.25434	4.32245	4.80049	4.93133	3.67453	4.1935
235	2	16.3908	0.0835744	1.141	101	0.75	0	5.94788	6.02358	5.09173	5.42737	5.38635	5.40371	6.02659	5.36964	5.11682
235	3	16.0333	0.0827721	1.14661	101	0.75	0	3.92255	3.05648	3.98431	3.72431	3.46032	3.04331	3.88071	4.00637	4.06487
235	4	15.6	0.079794	1.15361	101	0.75	0	2.76779	3.48823	2.46215	2.36357	2.56251	2.42163	3.17368	2.69441	2.36463
235	5	15.3775	0.0743031	1.15771	101	0.75	0	3.2181	2.80432	1.90722	3.03118	2.9886	2.54866	3.00284	2.77053	2.49223
235	6	15.195	0.0745916	2.98705	101	0.75	0	2.10861	2.15287	1.63165	1.64805	2.31431	1.19079	2.659	1.50134	1.31644
235	7	17.48	0.196041	142.877	101	0.75	0	3.55156	4.21123	4.92959	2.54	2.09768	3.35345	2.51831	1.64673	1.46388
235	8	22.925	0.696866	447.29	101	0.75	0	10.4055	32.7146	56.3307	7.64061	18.0079	68.9907	29.9493	80.872	104.66
235	9	27.0383	1.54756	1388.64	101	0.75	0	18.9759	41.0279	63.7112	17.386	29.0828	82.6902	42.5901	102.29	129.167
235	10	29.9775	2.25016	1815.97	101	0.75	0	22.8712	43.3609	66.6222	22.5856	34.6591	86.4316	46.3774	106.078	132.656
235	11	30.7492	2.36226	1983.7	101	0.75	0	23.2781	43.2995	66.6561	23.0889	34.7623	85.8026	46.6755	103.548	131.335
235	12	30.7508	2.37878	2039.82	101	0.75	0	23.036	42.9231	65.6297	21.5351	33.6121	84.2571	45.4288	104.242	126.145
235	13	30.8192	2.55385	2054.01	101	0.75	0	23.3382	42.8147	64.4375	22.7602	33.6652	83.5787	45.1321	104.112	125.662
235	14	31	2.60447	1995	101	0.75	0	24.7094	43.212	64.7406	23.8351	35.3067	83.483	44.9907	104.583	126.374
235	15	30.5292	2.40637	1495.47	101	0.75	0	29.6269	49.2413	71.378	29.0351	39.7016	90.1883	49.4937	107.081	132.27
235	16	29.2925	2.08712	537.571	101	0.75	0	28.2792	39.138	55.0097	27.3523	34.5615	54.1432	38.6005	64.3023	85.355
235	17	24.8917	1.22675	53.7151	101	0.75	0	18.0797	16.7635	17.5606	17.3732	19.1981	17.5817	19.6065	16.8582	17.7673
235	18	20.1483	0.523049	1.65798	101	0.75	0	14.3001	12.6905	12.9294	12.7221	12.36	13.1415	15.4203	13.4364	12.8637
235	19	18.2533	0.347699	1.1027	101	0.75	0	12.3147	12.0143	11.727	12.7052	11.6093	11.7289	13.6145	12.068	12.7819
235	20	17.2508	0.256247	1.12301	101	0.75	0	11.2975	10.6965	10.2827	11.3718	11.317	11.0997	11.5348	11.5471	11.8104
235	21	16.2942	0.208548	1.13985	101	0.75	0	11.1285	10.6265	10.3902	11.054	10.579	10.2026	11.511	10.2754	10.7023
235	22	15.4033	0.205305	1.15596	101	0.75	0	10.5069	10.2539	9.77048	10.5848	10.4432	10.8252	11.5071	10.8937	10.7581
235	23	14.3225	0.238629	1.17369	101	0.75	0	10.7192	10.0327	9.7839	10.38	10.5317	10.038	10.788	11.0596	11.1987
236	0	13.5358	0.199353	1.18907	101	0.75	0	9.73114	9.3521	9.3867	10.4552	10.3506	9.86866	10.1157	10.2925	10.5641
236	1	13.1075	0.16514	1.19856	101	0.75	0	9.79137	9.3088	9.22555	9.89615	10.4254	10.3963	9.41918	9.80325	10.7553
236	2	12.8775	0.153248	1.20303	101	0.75	0	9.50536	8.99363	7.58059	8.01362	8.63196	8.7404	9.58274	9.63306	10.5562
236	3	12.4325	0.140677	1.20956	101	0.75	0	8.43125	7.80471	7.00902	7.38006	7.40936	7.2326	8.4017	8.31512	8.15159
236	4	12.48	0.0945959	1.21099	101	0.75	0	6.86164	6.26052	5.28465	6.25106	6.31583	5.92514	6.5952	6.12055	6.54407
236	5	12.6567	0.0858984	1.20812	101	0.75	0	7.92161	7.50153	6.9514	7.14976	7.32024	6.70783	7.95634	8.14834	7.69386
236	6	12.7858	0.077876	3.02114	101	0.75	0	6.50433	6.79023	6.29133	6.7005	6.95522	7.30187	7.21422	6.99632	6.80782
236	7	15.5975	0.237215	137.686	101	0.75	0	5.8854	8.46583	8.84645	5.92835	5.95812	5.4422	6.41644	5.34483	5.59371
236	8	22.1742	0.989937	425.667	101	0.75	0	14.8689	42.2646	69.1675	13.8449	30.0104	15.0182	39.4417	107.191	132.684
236	9	27.0125	2.21037	1371.97	101	0.75	0	22.5377	44.904	71.332	20.8073	34.361	23.0413	46.8602	112.948	154.511
236	10	29.5017	2.63138	1744.4	101	0.75	0	24.5054	44.6819	73.208	22.6867	35.361	23.802	49.5114	114.747	139.95
236	11	30.3008	2.87886	1894.83	101	0.75	0	24.7886	45.5272	70.2905	23.2922	35.3606	23.7598	51.4674	114.024	140.897
236	12	30.5692	2.71553	1964.66	101	0.75	0	25.2527	44.5093	65.0397	24.825	34.9789	59.558	48.9875	107.209	136.008
236	13	30.3192	2.66026	1965.64	101	0.75	0	26.4674	43.5468	63.7923	25.924	35.5298	81.3159	47.5788	103.075	122.237
236	14	30.2175	2.62499	1906.57	101	0.75	0	25.4957	43.0294	63.935	24.4887	34.6536	80.2533	46.5322	101.926	123.311
236	15	29.3625	2.5125	1448.42	101	0.75	0	24.6875	43.065	63.6603	24.4424	34.1626	81.0686	44.8721	101.748	121.96
236	16	27.7817	2.15305	511.916	101	0.75	0	23.7658	34.2257	48.9099	23.263	29.5706	47.2337	32.2973	59.6293	74.4523
236	17	24.2592	1.48151	54.6761	101	0.75	0	20.8957	21.096	20.7319	20.7927	21.2631	21.0203	21.3786	20.0235	21.0817
236	18	19.3642	0.657827	1.72749	101	0.75	0	13.9118	12.9932	12.8141	14.0964	13.643	13.3662	16.1462	13.6046	13.7374
236	19	16.7542	0.362485	1.12932	101	0.75	0	13.9427	12.9658	12.3924	13.3078	13.332	13.1747	15.6532	12.9825	13.131
236	20	15.6033	0.265184	1.15225	101	0.75	0	12.4952	11.883	12.2754	12.0796	12.1818	11.4747	12.9412	12.2989	11.4583
236	21	14.8775	0.209912	1.16637	101	0.75	0	11.7194	12.0835	11.3752	12.4148	11.9656	12.3105	12.7803	12.1221	12.4165
236	22	14.285	0.166342	1.17707	101	0.75	0	10.3868	10.0946	9.84223	10.0847	10.228	10.2261	11.2549	11.2161	10.2822
236	23	13.6492	0.132932	1.18867	101	0.75	0	10.6243	9.70737	8.79857	9.89961	9.81373	9.62973	10.7049	10.1086	10.6656
237	0	13.1775	0.117082	1.19816	101	0.75	0	10.5142	10.3145	9.5202	9.56654	9.66843	9.68868	10.5024	9.91757	10.2008
237	1	12.6275	0.10078	1.2067	101	0.75	0	8.74481	8.01008	7.42989	8.20614	7.18954	7.19042	8.1252	8.03973	8.32435
237	2	12.2733	0.0876055	1.21386	101	0.75	0	7.9605	7.14748	6.70896	8.04832	7.73094	6.85863	8.09653	7.52059	7.62647
237	3	12.0358	0.0813719	1.21983	101	0.75	0	7.8053	7.77682	6.48173	7.88439	7.55168	7.67314	8.31535	7.75236	7.63913
237	4	11.8725	0.0786402	1.22189	101	0.75	0	7.0064	6.74255	5.87973	6.37774	6.33704	6.79768	6.6896	6.85948	6.38294
237	5	11.7825	0.0736463	1.22313	101	0.75	0	6.27755	5.9865	5.93383	5.58593	5.70545	5.21286	6.61576	5.84345	6.47359
237	6	11.8433	0.0703301	3.38302	101	0.75	0	5.09758	4.98091	4.94057	5.3072	4.86227	5.58705	5.96889	5.35681	4.97759
237	7	14.87	0.201932	148.256	101	0.75	0	7.43214	8.58099	8.61013	4.12074	5.39243	5.30036	5.38195	5.63647	5.58721
237	8	21.5558	0.807424	470.117	101	0.75	0	16.2878	42.8539	66.2308	13.7638	27.6394	28.6918	40.6772	100.68	129.199
237	9	26.3042	1.73914	1374.69	101	0.75	0	24.796	42.3975	63.6761	23.0206	34.0231	81.3264	44.0394	96.7351	122.148
237	10	28.4317	2.14442	1694.89	101	0.75	0	26.5453	42.4822	62.3343	24.4938	34.8043	81.2562	44.5685	96.7064	116.712
237	11	28.8525	2.21579	1823.46	101	0.75	0	27.2321	43.0011	61.9371	24.7981	35.2787	81.6482	46.3272	98.1711	118.037
237	12	30.0983	2.44126	1963.73	101	0.75	0	26.3584	43.5119	61.5039	25.1165	35.8161	82.1709	48.0385	99.6733	119.363
237	13	29.8708	2.32771	1963.37	101	0.75	0	26.211	43.8352	66.2864	25.6522	36.0246	79.8602	47.5828	100.83	123.463
237	14	29.8683	2.26499	1889.74	101	0.75	0	26.9122	43.5562	64.9343	25.7182	35.7648	80.6508	45.9625	98.9003	123.647
237	15	29.2883	2.09835	1397.76	101	0.75	0	25.902	42.4361	62.3965	25.2794	35.7518	83.2119	45.5038	97.5251	121.562
237	16	27.4883	1.74284	427.657	101	0.75	0	25.2996	35.569	48.8309	23.6467	30.9587	48.3266	32.997	62.5973	78.6888
237	17	24.5042	1.21546	61.9254	101	0.75	0	24.0738	22.8227	22.4438	21.8493	21.5711	23.6895	22.4241	21.2317	21.4264
237	18	23.0633	1.00944	1.39903	101	0.75	0	23.1729	20.8405	20.9566	21.1203	20.0318	21.8068	22.3017	19.9973	20.8827
237	19	21.8308	0.842976	1.0567	101	0.75	0	19.9509	18.4423	17.6794	18.2285	17.4243	18.6038	20.1549	18.1876	17.8611
237	20	18.74	0.400207	1.09845	101	0.75	0	12.8923	12.1061	10.7414	12.2332	11.5825	11.663	13.3635	12.0566	12.0072
237	21	17.4975	0.23951	1.12339	101	0.75	0	10.8108	10.8101	9.52054	11.382	10.7246	11.2138	12.2004	11.5582	11.0992
237	22	16.9842	0.188705	1.13407	101	0.75	0	11.5682	10.4436	10.3634	11.9161	10.9013	11.2966	11.599	10.9288	10.4082
237	23	16.4517	0.152476	1.14371	101	0.75	0	10.2769	9.33398	9.05542	10.0359	9.55359	8.72924	9.74894	9.16638	9.0971
238	0	16.0667	0.13196	1.15049	101	0.75	0	10.5199	9.16848	9.46285	9.65891	10.7896	9.96545	10.3812	10.2155	9.03068
238	1	15.7958	0.124327	1.15557	101	0.75	0	9.50647	9.33407	9.60862	9.88953	9.81877	10.0855	9.26917	9.60255	9.14471
238	2	15.4092	0.108251	1.16223	101	0.75	0	8.19913	8.22485	6.81993	8.04561	8.19388	7.29947	7.99312	9.1544	8.92947
238	3	15.3125	0.0959218	1.164	101	0.75	0	8.1836	7.38229	6.68534	7.56484	7.35568	6.32644	7.92793	7.40057	7.82905
238	4	15.5042	0.0936426	1.16066	101	0.75	0	7.07185	7.31631	7.80054	8.08762	7.56827	7.64172	8.59483	6.90966	8.41119
238	5	15.2575	0.0865649	1.16439	101	0.75	0	6.48323	6.96742	6.65434	6.80919	6.43075	6.91221	7.16018	7.25119	6.62172
238	6	15.2517	0.0816262	2.58415	101	0.75	0	6.08742	6.25961	5.20705	5.79744	5.87799	6.40506	6.74845	7.49522	5.81237
238	7	16.6233	0.101716	68.8188	101	0.75	0	6.05021	8.67996	9.30772	6.01615	5.04944	7.21725	6.11728	5.70546	4.78208
238	8	20.7058	0.542576	325.349	101	0.75	0	18.2267	39.766	62.8154	15.0155	27.8484	78.6291	40.2627	90.1534	109.296
238	9	24.1	1.10951	745.803	101	0.75	0	22.0478	39.6768	64.6199	21.0274	32.0528	80.9453	43.0656	99.3844	128.104
238	10	26.0908	1.42965	956.454	101	0.75	0	23.1346	41.4266	67.0571	22.8484	33.1894	80.8418	46.4643	103.38	130.049
238	11	27.0633	1.59985	1131.11	101	0.75	0	26.0212	43.8668	65.9093	24.5871	34.8733	82.1109	49.4636	102.04	133.39
238	12	27.7575	1.7237	949.924	101	0.75	0	26.6453	43.0274	65.9891	24.6581	35.2719	85.1502	50.1973	106.427	130.895
238	13	27.4108	1.68805	1179.46	101	0.75	0	26.6611	43.2473	65.0498	24.2439	35.2666	83.1058	48.0349	100.832	124.845
238	14	30.4117	2.33993	1804.8	101	0.75	0	27.075	42.7059	63.4247	24.7795	35.2476	81.0711	47.2964	100.602	129.129
238	15	29.63	2.13368	1343.46	101	0.75	0	25.9703	43.7836	63.881	24.2103	35.2323	84.1861	47.1055	103.275	130.815
238	16	27.425	1.70142	508.524	101	0.75	0	25.2474	36.3617	51.8389	22.8594	29.6751	51.44	33.5742	59.1449	75.184
238	17	24.7583	1.24661	70.371	101	0.75	0	22.2024	21.7525	21.0134	21.392	20.1876	21.6455	22.9774	19.8376	20.2667
238	18	20.8408	0.612496	1.53934	101	0.75	0	14.5212	14.1978	14.6496	13.592	13.4226	13.9811	17.1846	13.9695	13.9829
238	19	18.0325	0.246456	1.10683	101	0.75	0	9.96913	9.74699	9.91134	10.4417	10.1278	9.73453	12.8965	10.309	9.66812
238	20	16.6058	0.152433	1.13428	101	0.75	0	10.0638	8.92631	7.16385	9.42178	9.21825	8.64761	10.6944	8.51981	8.52551
238	21	15.7542	0.130605	1.15186	101	0.75	0	10.6903	9.58422	8.25942	9.37485	9.54563	8.59645	10.1871	8.17087	8.432
238	22	15.8975	0.136274	1.15381	101	0.75	0	10.6668	9.91465	9.84789	10.2433	10.3485	9.80535	10.9752	10.1471	11.2555
238	23	16.335	0.152432	1.15069	101	0.75	0	11.4965	10.4697	9.51364	11.1932	10.7449	11.0647	10.9744	10.6454	10.004
239	0	16.95	0.158409	1.13792	101	0.75	0	12.9097	12.1173	10.8504	11.9594	12.1859	12.0434	13.518	12.1005	11.2674
239	1	17.7508	0.272978	1.13083	101	0.75	0	16.443	15.03	15.1559	16.2832	15.2243	14.5236	15.2687	14.0744	13.8645
239	2	19.0642	0.4147	1.11093	101	0.75	0	21.1543	18.5382	17.4557	18.0091	17.4549	18.2782	16.5837	16.7946	16.5329
239	3	20.4033	0.608299	1.08768	101	0.75	0	23.1343	22.1999	21.2042	21.0382	20.7128	21.3164	21.4766	21.2271	21.8252
239	4	20.6417	0.653558	1.08016	101	0.75	0	23.466	21.8321	21.0236	20.8678	20.4482	22.7856	21.4523	21.9062	21.0387
239	5	20.4433	0.642596	1.08657	101	0.75	0	22.7441	21.0575	20.3759	20.4661	19.8325	21.6723	20.9842	20.2248	21.653
239	6	20.2992	0.624057	3.23952	101	0.75	0	22.4141	21.2936	20.5823	20.2554	20.0771	20.9224	20.7611	20.0092	19.4334
239	7	22.2967	0.889207	146.725	101	0.75	0	21.7464	22.4854	22.1233	20.4121	20.2223	21.979	20.3832	19.1705	19.9
239	8	25.585	1.39653	475.27	101	0.75	0	23.7826	39.825	58.8973	22.2887	31.3954	73.6186	39.5016	81.8507	103.512
239	9	27.7392	1.76967	1271.52	101	0.75	0	24.6995	40.1268	60.7287	23.5135	31.0147	63.0678	39.4942	80.3711	108.068
239	10	27.185	1.65214	896.17	101	0.75	0	24.6411	23.8825	24.9209	23.1545	23.1203	23.9288	23.3419	22.9524	23.0391
239	11	27.2208	1.65786	1037.23	101	0.75	0	24.0382	22.2813	23.111	22.6798	24.3597	24.2568	23.7558	22.8812	23.4918
239	12	29.085	2.02062	1469.23	101	0.75	0	24.4098	35.3008	48.7898	24.1836	32.3988	74.0846	41.8784	79.0688	99.5492
239	13	27.8533	1.77196	1061.88	101	0.75	0	24.6512	40.3219	62.1701	25.3176	32.9604	77.0982	44.1693	94.9297	123.143
239	14	29.9608	2.24802	1816.96	101	0.75	0	27.1252	40.815	65.0248	25.4286	34.3806	78.4045	45.7729	91.1586	116.859
239	15	29.6775	2.17769	1385.56	101	0.75	0	28.9351	43.5352	63.6467	27.837	35.7804	79.3634	47.1425	94.9462	124.066
239	16	26.7417	1.63798	374.862	101	0.75	0	28.0453	35.1434	48.4889	26.2334	32.4229	49.5482	35.366	57.1989	69.6206
239	17	24.7333	1.35957	92.2055	101	0.75	0	26.6707	25.3951	24.4686	24.4368	25.5552	25.4444	26.4658	24.4999	25.3617
239	18	22.7392	1.03007	1.6902	101	0.75	0	25.6187	24.6527	23.649	24.0076	23.8736	23.7218	25.4734	22.5721	23.1523
239	19	21.9183	0.890543	1.05971	101	0.75	0	27.179	25.5176	24.9187	25.4957	25.6757	26.115	26.8455	25.3312	25.4834
239	20	21.2267	0.780682	1.07052	101	0.75	0	26.5006	25.6695	24.3242	25.3718	25.216	25.7143	25.8978	24.6436	25.2482
239	21	20.8425	0.742088	1.07943	101	0.75	0	26.4649	24.5585	24.226	25.5542	24.5265	25.9269	25.3047	23.0715	24.9569
239	22	20.6017	0.714321	1.0851	101	0.75	0	25.6121	23.7173	23.0375	23.6156	23.4504	24.3436	23.139	22.823	24.16
239	23	20.8008	0.73979	1.08181	101	0.75	0	24.4827	23.7287	23.4213	23.9084	22.457	24.0026	23.7293	23.343	23.713
240	0	20.85	0.749175	1.08034	101	0.75	0	24.7328	23.6157	22.9888	23.0004	22.2635	24.238	23.7856	22.551	22.4025
240	1	20.7858	0.744653	1.08162	101	0.75	0	24.0432	23.7644	22.4554	23.7239	22.9563	22.5138	22.7772	22.4079	23.8436
240	2	20.63	0.735358	1.08639	101	0.75	0	24.3625	23.2034	22.1559	23.2812	22.9049	23.3246	22.6902	22.5955	22.6443
240	3	20.59	0.741088	1.08657	101	0.75	0	24.3223	23.2755	22.0942	23.4548	22.6816	23.446	22.5931	22.1878	22.1288
240	4	20.4333	0.727595	1.09025	101	0.75	0	24.1597	23.5037	22.4067	23.2091	22.3359	23.0118	23.7907	22.2557	22.5929
240	5	20.4117	0.723175	1.09007	101	0.75	0	22.9205	22.476	21.7913	22.6898	21.3903	21.8731	21.8223	22.0681	22.2634
240	6	20.96	0.775111	3.23746	101	0.75	0	23.3638	22.3006	21.4352	21.7051	21.6429	22.6418	21.7176	21.0059	21.9917
240	7	22.8633	1.08545	152.674	101	0.75	0	24.2053	23.0938	24.2939	22.6048	22.4764	23.5815	21.4767	22.4724	22.2574
240	8	24.095	1.31899	349.539	101	0.75	0	25.2284	42.5863	64.5898	23.9117	33.0025	74.7623	41.4115	85.1103	105.272
240	9	27.21	1.84535	1402.89	101	0.75	0	26.3363	41.431	64.0962	26.0168	34.5996	83.3015	45.9052	95.3237	121.197
240	10	29.7267	2.38956	1769.84	101	0.75	0	28.0121	43.6131	64.5406	27.158	35.9065	81.4198	49.9191	101.906	125.027
240	11	30.2283	2.58089	1835	101	0.75	0	28.1058	44.5076	66.9765	27.9886	36.5082	81.8086	49.2003	100.414	121.839
240	12	29.3158	2.32371	1230.23	101	0.75	0	29.0335	44.4803	66.9158	26.6357	36.1153	79.1333	47.9761	98.1671	121.465
240	13	29.5175	2.26491	1483.71	101	0.75	0	28.2403	44.6117	67.4386	26.2973	35.6121	81.7727	49.968	102.776	120.693
240	14	28.9533	2.12132	1145.88	101	0.75	0	27.2187	43.0199	67.1085	25.9327	34.6974	81.1629	48.5552	100.15	124.94
240	15	28.7417	2.07376	907.877	101	0.75	0	25.1841	40.8381	63.6128	24.7538	34.1158	83.2812	46.928	100.993	126.135
240	16	27.4692	1.78044	283.409	101	0.75	0	24.8957	35.6236	50.5645	24.2363	30.954	48.8106	34.6796	61.4233	75.8611
240	17	24.8158	1.28783	55.5356	101	0.75	0	23.6035	22.221	21.7325	22.0822	22.6744	23.5027	24.841	22.4729	23.036
240	18	22.855	0.973528	1.70127	101	0.75	0	24.466	23.0232	22.5081	22.7047	22.4404	23.1537	25.2954	22.7979	22.7016
240	19	22.5583	0.932351	1.04494	101	0.75	0	24.178	22.1998	22.1613	22.6467	21.9032	23.092	24.3799	22.5482	22.7899
240	20	22.4133	0.813058	1.04458	101	0.75	0	25.0458	24.0449	23.4758	23.6622	23.7876	24.129	24.5694	23.5112	24.1427
240	21	21.68	0.664612	1.059	101	0.75	0	24.4025	23.7978	22.7042	22.7378	22.7831	23.8222	23.0863	22.8116	22.9139
240	22	21.4133	0.578753	1.06871	101	0.75	0	23.3674	22.5117	21.5911	22.0163	21.5583	22.3933	22.1984	21.3246	21.8312
240	23	21.5658	0.615899	1.06474	101	0.75	0	22.26	20.8248	21.1132	22.1769	20.5859	21.3061	22.0524	21.2722	21.8999
241	0	21.3708	0.613047	1.0707	101	0.75	0	23.3139	21.7105	21.3212	20.6478	20.5201	21.4569	21.7388	20.6815	21.2536
241	1	21.475	0.626099	1.06871	101	0.75	0	23.6624	22.4152	21.6908	22.7703	21.1951	22.6712	21.9731	21.1946	21.8882
241	2	21.3233	0.610238	1.07269	101	0.75	0	23.7668	22.9928	21.5511	23.1754	21.4251	22.4462	22.3472	21.7249	22.4353
241	3	21.3133	0.620818	1.07124	101	0.75	0	25.0262	22.9607	23.0433	23.2832	22.066	23.4676	22.3444	21.8583	22.7877
241	4	21.6867	0.676076	1.06348	101	0.75	0	25.1662	23.7372	22.5869	24.1252	23.8841	23.8158	23.5499	23.1389	24.0289
241	5	21.6217	0.691468	1.0633	101	0.75	0	24.2869	24.3957	24.0961	23.8346	23.2612	23.9044	23.7017	23.3151	23.1064
241	6	21.7308	0.688046	2.10623	101	0.75	0	24.5506	23.0236	23.2034	23.4991	22.5234	22.9064	22.7397	22.4096	22.9239
241	7	22.7975	0.728178	158.101	101	0.75	0	24.8097	25.4834	25.7883	23.3539	23.8162	24.5973	24.1196	23.103	23.8422
241	8	24.8767	1.12024	389.104	101	0.75	0	27.6284	41.324	63.1673	25.6539	32.2732	58.7043	39.2229	72.3414	91.6749
241	9	24.0517	0.874258	640.252	101	0.75	0	25.4791	24.3649	26.4504	23.8327	23.049	24.2117	23.6935	23.0773	24.3223
241	10	27.4942	1.55547	1318.33	101	0.75	0	26.8743	27.3306	25.2838	25.5513	25.9134	25.0198	26.1648	25.2371	25.3238
241	11	28.3533	1.80982	1495.64	101	0.75	0	27.1469	27.1285	26.8881	26.1661	26.7888	26.6194	27.3096	25.5302	26.8892
241	12	28.445	1.86494	1417.84	101	0.75	0	27.5875	31.9447	38.4709	26.8595	27.9604	37.8107	29.5106	35.3296	38.0983
241	13	27.62	1.65421	1051.68	101	0.75	0	26.8491	40.2802	60.3978	26.4471	34.2679	75.0519	45.4498	92.0162	109.334
241	14	24.5667	0.974834	725.213	101	0.75	0	25.3777	40.8014	60.2824	24.8346	33.5158	75.352	44.005	91.5783	111.889
241	15	25.0042	1.18696	533.488	101	0.75	0	26.0284	40.2322	62.228	24.5285	32.7855	77.6876	44.3196	92.3805	111.842
241	16	26.0342	1.45299	330.244	101	0.75	0	26.2178	33.6274	48.517	24.7444	30.4309	44.7429	34.0368	55.5044	66.2164
241	17	24.2158	1.11897	70.9596	101	0.75	0	23.9494	24.1297	23.1693	23.7415	24.1892	24.1968	25.6192	23.1794	24.0312
241	18	21.8533	0.67801	1.24268	101	0.75	0	22.7241	22.0376	21.221	22.1873	20.4427	21.2827	23.6439	21.7192	21.1365
241	19	22.0117	0.718583	1.05634	101	0.75	0	23.7127	21.9717	21.6683	22.9176	21.9824	22.5283	23.0218	22.0157	21.9259
241	20	20.8725	0.52904	1.07034	101	0.75	0	23.718	22.1999	22.0289	22.6282	21.1231	22.215	21.8191	21.7625	22.0487
241	21	20.6725	0.48746	1.07597	101	0.75	0	22.6198	22.2164	21.6246	22.3337	21.64	21.7011	22.0716	21.3389	22.2104
241	22	20.5442	0.444666	1.07651	101	0.75	0	23.8313	23.1017	22.8628	23.0597	21.9658	22.9157	22.4211	21.6758	22.4746
241	23	21.2717	0.650069	1.06709	101	0.75	0	24.4904	24.2858	23.1789	24.3692	23.5483	24.8822	23.862	23.5637	24.0169
242	0	21.5242	0.803504	1.06492	101	0.75	0	26.6148	25.93	24.3132	25.4387	26.0607	25.4584	24.9207	24.3488	25.4073
242	1	21.2467	0.813428	1.06889	101	0.75	0	26.4043	25.0371	25.0685	24.7753	24.1993	24.8043	24.652	24.2832	24.9469
242	2	21.1733	0.801171	1.06853	101	0.75	0	26.3536	25.5405	25.1032	25.4523	24.2831	25.1134	24.6577	24.8477	25.1191
242	3	20.8025	0.743625	1.07742	101	0.75	0	26.6184	25.4535	25.2956	25.6767	24.5729	25.2905	25.1096	24.0067	25.7987
242	4	21.3833	0.78866	1.0642	101	0.75	0	25.8834	25.5632	25.6397	24.9783	23.9971	25.1419	24.5586	23.9314	25.3563
242	5	21.2742	0.677401	1.0624	101	0.75	0	25.546	25.2378	24.1739	24.1146	24.7819	24.403	23.0307	23.331	24.3274
242	6	21.2633	0.617492	1.55876	101	0.75	0	25.3552	24.5123	24.4944	24.3288	24.0159	24.0933	23.1393	23.4109	24.0651
242	7	21.4758	0.574983	18.7515	101	0.75	0	24.0214	23.9606	25.215	22.8576	23.294	23.44	22.2591	21.6165	22.8692
242	8	21.86	0.594495	99.6113	101	0.75	0	23.7475	40.2369	63.526	22.7188	31.9307	73.3098	39.7849	89.2497	96.0963
242	9	22.87	0.717824	233.192	101	0.75	0	23.9637	38.1437	61.4864	22.1607	31.9878	77.4984	43.302	98.288	116.949
242	10	23.7142	0.808398	407.1	101	0.75	0	24.0082	39.7313	62.3815	22.4476	31.9412	77.1066	44.4999	95.6914	113.488
242	11	24.2458	0.857029	362.667	101	0.75	0	23.4164	39.6712	62.3772	22.2964	31.8551	77.2553	44.5406	99.9734	118.476
242	12	23.06	0.599866	252.199	101	0.75	0	22.1908	37.6136	60.8765	20.589	29.8432	76.9842	43.4723	91.7505	117.451
242	13	23.4667	0.742776	206.29	101	0.75	0	22.6915	38.189	60.4309	21.8051	30.7154	74.5293	43.93	93.823	109.98
242	14	23.3575	0.740291	204.453	101	0.75	0	22.1944	38.0656	61.4088	21.1712	30.3195	74.6425	43.833	93.4319	112.832
242	15	24.6825	0.950417	523.772	101	0.75	0	22.6622	37.9538	60.4583	21.682	31.3682	75.4177	43.1871	93.3868	112.573
242	16	23.8042	0.797033	327.876	101	0.75	0	21.913	31.235	46.4599	20.6396	27.2926	42.9364	31.7877	55.9503	67.2963
242	17	22.5767	0.629586	24.6318	101	0.75	0	21.8312	20.7487	20.431	20.9929	19.8316	20.7929	22.5385	20.6307	20.7636
242	18	21.7858	0.518921	1.45591	101	0.75	0	21.4506	21.0581	20.7522	20.8408	20.285	20.8445	21.6632	19.9982	20.8733
242	19	21.6075	0.483922	1.05452	101	0.75	0	22.3931	21.5575	21.1266	21.4475	20.2854	21.0946	21.4234	20.4163	21.3548
242	20	20.8758	0.305016	1.07054	101	0.75	0	20.8919	20.2786	19.5136	20.0802	19.3368	20.283	20.3335	19.1851	19.4619
242	21	20.5033	0.20354	1.07797	101	0.75	0	20.1642	19.9369	19.8985	19.8371	19.1777	19.259	19.7784	19.2765	19.5451
242	22	20.535	0.213278	1.07578	101	0.75	0	21.0118	20.5675	19.8865	19.4498	19.7625	20.0993	20.3774	19.3718	19.7162
242	23	20.3625	0.192741	1.07906	101	0.75	0	20.6867	20.1692	19.1087	19.8877	19.3979	19.6929	19.8205	19.6324	18.8564
243	0	20.5717	0.226062	1.07669	101	0.75	0	20.4033	19.4688	18.8649	19.5405	18.9704	19.7227	20.192	19.4653	19.1292
243	1	20.5767	0.248735	1.07578	101	0.75	0	20.6904	19.7466	19.2426	19.4559	19.3201	19.7665	19.619	18.589	19.8442
243	2	20.7417	0.294183	1.07142	101	0.75	0	20.1101	19.5664	19.5237	19.8585	19.4103	19.5825	19.6333	19.1158	19.0824
243	3	21.0333	0.342934	1.06582	101	0.75	0	19.7221	18.7969	18.5062	19.4731	19.1827	20.1293	19.2075	18.1847	18.9162
243	4	21.1675	0.358743	1.06402	101	0.75	0	20.6946	19.8397	18.9816	18.8824	19.0183	19.8538	19.54	18.2309	19.5463
243	5	20.5042	0.195109	1.07778	101	0.75	0	20.5582	19.3015	19.0964	19.804	19.4673	19.6481	19.4459	18.9841	19.4
243	6	20.82	0.239279	1.96105	101	0.75	0	21.3268	19.8604	19.4682	19.9082	19.5908	20.0254	19.8253	20.2282	19.3849
243	7	21.1558	0.268009	24.8503	101	0.75	0	20.2768	20.5431	20.7435	19.4931	18.9466	19.5576	18.9898	18.4635	19.3293
243	8	21.6725	0.325578	103.301	101	0.75	0	20.4087	36.8003	62.5989	18.7567	28.5809	71.1137	35.6945	85.3663	97.9986
243	9	22.305	0.378298	201.046	101	0.75	0	19.0601	35.7114	59.2325	18.2013	28.2559	79.1922	39.5489	95.314	118.668
243	10	21.8233	0.221969	214.364	101	0.75	0	17.8773	35.9456	61.1999	17.2518	27.463	80.9476	39.5168	101.19	121.576
243	11	23.9942	0.633879	635.76	101	0.75	0	20.6057	35.5397	61.4304	18.5038	29.1806	77.0313	41.2677	103.491	122.875
243	12	24.89	0.824665	544.642	101	0.75	0	20.607	36.1859	62.0394	19.0591	29.1578	78.6392	42.1675	97.8068	123.93
243	13	24.9283	0.821999	512.257	101	0.75	0	20.6093	37.7606	59.9457	19.062	29.1279	77.5445	43.2708	100.913	113.668
243	14	24.49	0.781713	431.584	101	0.75	0	21.3381	36.7975	60.9186	20.405	29.8045	73.7757	42.7554	93.2306	116.777
243	15	22.9708	0.542243	145.602	101	0.75	0	21.052	37.3452	62.0078	20.4075	30.444	78.9262	42.8125	92.429	115.908
243	16	22.8792	0.583851	65.8691	101	0.75	0	19.8254	31.3043	45.5684	19.114	26.5127	44.4362	31.5819	55.1264	69.9744
243	17	22.1208	0.449841	9.38554	101	0.75	0	19.0772	18.3821	17.796	18.3065	17.733	18.8012	19.9233	17.5798	18.1348
243	18	21.9867	0.436248	1.19578	101	0.75	0	18.7651	17.7426	16.75	18.0203	17.2792	18.2933	19.9936	16.9246	17.3845
243	19	22.3567	0.579686	1.04564	101	0.75	0	20.0309	19.527	18.7088	18.9867	18.9313	19.2512	20.6299	18.2902	19.581
243	20	22.2558	0.563077	1.04653	101	0.75	0	20.5573	19.3893	18.9004	19.1275	18.6855	19.0515	20.0249	17.9737	19.936
243	21	22.0867	0.544514	1.0499	101	0.75	0	20.8524	19.6066	19.194	19.6245	19.1487	19.7171	19.6535	18.7703	19.0169
243	22	21.105	0.306951	1.06496	101	0.75	0	19.8451	20.0964	19.1769	19.7061	18.6873	18.9298	19.5187	18.6049	18.2089
243	23	20.7592	0.260092	1.07687	101	0.75	0	17.5238	17.6702	16.3208	16.5402	16.0697	17.3047	16.3115	16.0631	15.7783
244	0	20.8283	0.231017	1.07324	101	0.75	0	18.1824	17.7085	16.8499	17.6077	16.6981	17.8307	18.1892	16.2325	16.0654
244	1	20.6467	0.206788	1.07797	101	0.75	0	17.8399	16.7644	17.2588	15.877	15.2726	15.9992	16.9444	16.2821	16.7687
244	2	20.4867	0.164561	1.07705	101	0.75	0	18.3112	18.7127	18.4066	17.7786	17.7905	19.367	18.568	17.2861	17.7192
244	3	20.4458	0.17819	1.07742	101	0.75	0	15.236	15.9128	16.8887	15.948	16.0658	15.3594	15.2895	14.685	14.5402
244	4	20.7592	0.272796	1.07669	101	0.75	0	17.8095	15.9113	15.5596	16.3874	16.6309	16.3204	16.16	15.4696	17.0045
244	5	21.0792	0.373678	1.06961	101	0.75	0	17.8956	17.696	17.7997	17.6866	17.3003	18.2525	16.6272	17.2211	17.4019
244	6	21.215	0.384627	2.71209	101	0.75	0	16.3853	16.708	16.5741	16.8999	16.8858	16.3581	16.6531	16.0392	16.2661
244	7	21.7792	0.468495	59.1681	101	0.75	0	17.0145	18.7171	19.581	17.6659	16.9059	17.9235	16.4216	15.9924	16.0141
244	8	23.5742	0.717394	470.015	101	0.75	0	17.7546	35.4072	60.0876	17.1878	26.3506	68.0551	35.2144	86.14	99.0651
244	9	25.2508	0.944099	746.506	101	0.75	0	19.8162	36.4181	59.2078	18.3733	27.9206	76.0061	40.4859	92.5806	111.941
244	10	26.7975	1.21402	883.46	101	0.75	0	20.9971	36.8288	60.3781	19.5211	28.8421	75.91	41.9828	99.881	116.458
244	11	27.7817	1.47081	1296.6	101	0.75	0	21.2223	37.2774	61.8231	20.4136	29.5976	75.6131	41.8181	93.6696	117.002
244	12	30.1817	2.0173	1755.57	101	0.75	0	21.2529	36.915	58.7417	21.1364	29.8191	74.8009	41.9014	94.6503	111.634
244	13	29.305	1.81891	1146.5	101	0.75	0	20.5451	37.0342	56.8661	20.025	29.3875	74.0625	42.5796	93.3543	112.376
244	14	26.8867	1.25523	702.443	101	0.75	0	19.8409	37.6784	61.2031	20.017	29.8617	76.4575	42.4322	95.485	120.024
244	15	27.2042	1.42902	681.011	101	0.75	0	19.0215	36.5859	60.8536	18.1764	28.9043	77.2613	42.1869	91.4625	117.477
244	16	28.0225	1.58777	583.193	101	0.75	0	18.5377	29.1396	46.763	17.8355	25.4759	42.2777	29.1633	54.1981	66.9716
244	17	24.4433	0.988022	34.3896	101	0.75	0	18.5981	16.1925	16.7703	16.9702	16.1459	17.3556	18.6865	16.1446	17.3095
244	18	23.0083	0.752178	1.71736	101	0.75	0	19.0729	17.9852	17.0785	18.0228	16.9863	17.3003	19.0699	16.2741	17.4309
244	19	22.1425	0.613252	1.05097	101	0.75	0	16.2511	14.8427	14.5302	14.6738	14.3155	13.7412	16.5909	14.0898	15.1642
244	20	20.9475	0.443476	1.07088	101	0.75	0	14.5885	15.0075	14.3986	14.2899	13.4047	13.7751	14.5221	13.6	13.5473
244	21	20.1833	0.315823	1.08182	101	0.75	0	11.8393	11.0312	10.2785	11.1058	10.1925	10.9862	10.5106	10.4863	11.0704
244	22	19.2442	0.207098	1.09525	101	0.75	0	6.67416	6.11151	6.11795	6.20634	6.93495	7.12662	6.46083	6.59549	5.55893
244	23	18.8183	0.186009	1.10604	101	0.75	0	11.5901	10.7261	8.15592	9.18336	8.19193	7.95246	8.38828	7.11549	5.37505
245	0	20.46	0.443165	1.08952	101	0.75	0	14.5954	14.9617	15.3959	15.4554	13.2219	12.658	12.6388	13.5424	12.688
245	1	18.8667	0.224541	1.1012	101	0.75	0	6.70567	7.16617	6.8381	8.105	6.42042	6.59576	7.24976	6.2323	5.69748
245	2	18.7725	0.230725	1.10904	101	0.75	0	9.58734	9.28569	9.67183	12.8131	9.0624	6.94867	6.3925	5.66327	6.93474
245	3	19.2592	0.247188	1.10082	101	0.75	0	9.99186	10.9907	9.22144	9.82834	10.5514	10.8434	10.6875	11.276	10.5544
245	4	21.2167	0.518726	1.07253	101	0.75	0	18.3831	17.1798	16.3485	17.1493	17.3335	17.887	16.903	16.6173	17.6296
245	5	21.39	0.531424	1.0642	101	0.75	0	17.8962	16.9832	16.0171	17.1074	16.3365	17.0453	16.2159	17.102	16.7673
245	6	21.1758	0.491589	3.61285	101	0.75	0	18.8859	18.337	17.2664	18.1771	17.8383	18.2929	17.7904	17.2627	18.3654
245	7	21.7142	0.548259	86.0597	101	0.75	0	18.0488	18.8935	18.5759	17.2857	17.0721	18.3523	17.4986	17.4703	17.7973
245	8	24.995	1.07018	579.111	101	0.75	0	19.8481	36.5691	60.3476	18.7661	28.5543	69.6127	36.831	85.3868	104.511
245	9	27.9567	1.69025	1320.06	101	0.75	0	22.9274	37.7557	61.8094	21.956	31.2579	78.198	43.2449	91.6752	115.278
245	10	30.5183	2.34711	1749.07	101	0.75	0	23.1803	40.0718	60.8275	22.4629	32.6126	73.1047	45.6458	96.6071	115.269
245	11	30.9	2.5494	1966.13	101	0.75	0	24.1965	39.2614	60.1687	23.4746	32.6103	76.5	45.2636	92.6947	115.059
245	12	30.875	2.5756	2003.25	101	0.75	0	24.3859	39.7275	59.5493	23.7808	32.6263	75.2572	46.1041	95.4611	119.63
245	13	30.8767	2.52227	2012.74	101	0.75	0	24.7052	40.5227	58.5035	23.2781	32.4786	79.2018	44.8242	96.5769	114.222
245	14	31.3208	2.59502	1907.76	101	0.75	0	23.5082	29.0299	34.6664	22.7554	26.5065	46.9174	34.1085	58.1676	70.8162
245	15	29.5883	2.16104	1071.73	101	0.75	0	23.2634	28.4702	35.7743	22.1317	28.2851	56.7508	34.9878	62.9987	67.4049
245	16	28.2925	1.9592	505.933	101	0.75	0	22.8984	32.3549	48.1113	23.1499	27.9383	45.8249	31.4537	57.4402	65.7129
245	17	25.0392	1.35421	60.1539	101	0.75	0	24.6913	23.1477	23.0024	22.633	22.743	23.4793	23.2249	22.5345	23.282
245	18	22.795	0.989337	1.7497	101	0.75	0	21.9927	21.8512	21.0523	21.7389	21.0829	22.7612	23.7224	21.1212	22.4638
245	19	21.9333	0.836145	1.06043	101	0.75	0	22.6731	22.2366	21.018	20.8489	21.4196	21.1775	22.2943	20.1859	21.7482
245	20	21.7375	0.740928	1.0624	101	0.75	0	22.6627	22.9659	21.6347	22.0653	21.4903	22.2353	21.9072	21.035	21.3833
245	21	21.8783	0.743828	1.05542	101	0.75	0	21.8903	21.6317	20.5328	20.902	21.2444	21.6665	21.9447	20.9956	21.9683
245	22	21.6992	0.725174	1.05989	101	0.75	0	21.6253	20.3178	20.0567	21.0752	20.5887	20.6228	20.1702	20.2128	20.4662
245	23	21.875	0.696081	1.05488	101	0.75	0	22.5434	21.5028	21.1028	21.4534	20.1787	21.9308	21.5081	21.4466	22.0784
246	0	22.1117	0.714854	1.05346	101	0.75	0	23.2658	21.7912	21.3936	22.2161	20.9111	22.7954	21.993	21.3354	21.9447
246	1	21.7367	0.560024	1.06224	101	0.75	0	20.2417	19.0711	19.4702	20.4825	20.2459	20.5663	20.3005	20.6837	21.1105
246	2	20.6558	0.317611	1.07651	101	0.75	0	17.2233	16.2733	16.0563	15.7853	16.1295	15.8641	16.6542	14.522	13.8891
246	3	21.4375	0.569359	1.06709	101	0.75	0	23.6908	21.8862	21.9685	21.1205	20.7342	22.8191	21.1713	20.8742	22.1365
246	4	21.3533	0.556434	1.06582	101	0.75	0	22.0029	20.1472	20.984	21.0592	20.3516	22.8706	21.6013	21.385	22.5356
246	5	21.0192	0.486537	1.07088	101	0.75	0	23.3054	21.6239	21.6605	21.2353	21.6035	21.6915	21.2429	21.45	22.055
246	6	19.9158	0.352438	2.90268	101	0.75	0	15.3398	14.6347	13.1235	12.7934	11.0069	12.3337	12.2655	11.1317	12.2059
246	7	20.995	0.549958	53.969	101	0.75	0	18.3847	19.1016	19.4441	16.607	16.856	17.9379	17.315	16.7325	17.2032
246	8	24.315	1.10268	414.883	101	0.75	0	23.8035	28.8681	35.4374	21.6623	21.3669	21.547	22.1652	21.2784	22.9208
246	9	26.7092	1.5384	860.872	101	0.75	0	25.8384	23.8067	22.6445	24.0627	24.0909	24.9446	24.8864	23.6024	24.4879
246	10	28.9075	2.06332	1282.32	101	0.75	0	26.7318	26.2208	25.2105	26.4945	25.7134	26.1046	25.6223	24.5358	25.4891
246	11	30.9158	2.51434	1761.76	101	0.75	0	26.95	25.6509	24.7181	24.8597	25.4692	26.1438	25.5065	24.0643	25.5875
246	12	30.6333	2.34861	1527.53	101	0.75	0	26.6542	25.5308	24.7165	25.0227	24.6875	24.7967	24.2219	23.5443	25.8383
246	13	30.975	2.42236	1486.43	101	0.75	0	25.1166	25.0273	23.0248	23.7447	23.7172	24.929	23.4116	22.7443	23.8194
246	14	28.7183	1.86101	844.092	101	0.75	0	24.3748	37.2919	50.5105	23.277	30.2796	59.4523	34.9783	99.3542	106.717
246	15	28.4467	1.81217	824.976	101	0.75	0	24.6217	41.3179	63.6673	23.1898	33.1455	80.8282	46.4928	103.279	118.077
246	16	27.7242	1.61207	420.258	101	0.75	0	22.8249	33.6698	48.9194	22.7515	30.0477	45.8256	33.845	62.3914	73.5966
246	17	24.9392	1.11388	29.788	101	0.75	0	21.629	21.1235	20.604	20.494	20.2239	20.8754	22.4159	20.3097	21.3292
246	18	23.675	0.914347	1.66609	101	0.75	0	21.3983	21.1243	19.5038	19.9036	19.3546	19.8686	21.9822	19.7156	20.3208
246	19	22.9517	0.816537	1.04018	101	0.75	0	19.5917	20.5173	19.2195	18.3274	17.2084	18.1167	19.7977	16.9702	19.0571
246	20	23.1408	0.816066	1.03614	101	0.75	0	21.3276	20.4644	19.406	20.155	18.9608	20.0451	21.0616	19.5149	20.0249
246	21	22.8483	0.720448	1.03895	101	0.75	0	21.8315	20.7089	19.7902	20.6223	19.876	20.5908	20.0537	20.0303	21.0897
246	22	22.7142	0.684424	1.04229	101	0.75	0	21.1895	19.889	19.7047	20.5918	19.2771	20.6792	19.8522	19.1882	19.8804
246	23	21.9675	0.484907	1.05223	101	0.75	0	16.9658	15.9038	14.392	14.0699	13.4478	14.2333	15.2405	15.0773	15.6785
247	0	20.9975	0.259942	1.06781	101	0.75	0	16.5023	15.3817	14.9444	12.9853	13.2371	13.8208	13.2993	15.0226	14.8096
247	1	20.7825	0.207094	1.07342	101	0.75	0	16.217	14.2043	13.1741	12.7008	13.2662	15.1975	13.1959	12.1723	14.421
247	2	20.8267	0.205876	1.07197	101	0.75	0	10.4742	7.65838	9.64048	7.95912	7.39535	6.08186	10.7567	8.10986	10.0667
247	3	20.0683	0.136002	1.07962	101	0.75	0	3.48326	2.79584	2.94859	2.47847	1.95911	2.05904	2.77674	2.25025	1.9532
247	4	18.9992	0.110691	1.09729	101	0.75	0	1.70276	1.25669	1.01896	1.12237	1.44967	1.89309	1.93783	1.50277	0.841658
247	5	18.8125	0.0971181	1.10212	101	0.75	0	1.11376	1.68096	1.63938	1.11283	1.91321	0.608415	0.996668	0.360722	0.633547
247	6	18.43	0.0953074	4.63858	101	0.75	0	0.807298	0.596951	1.4015	0.320391	0.850766	1.62541	1.45952	0.278618	0.553724
247	7	21.5625	0.368622	166.01	101	0.75	0	6.32764	6.43234	6.74528	2.11888	2.36798	4.59943	3.43175	3.51716	4.42772
247	8	25.8483	1.03615	501.39	101	0.75	0	18.5418	29.3972	46.8603	16.1936	24.9181	38.1705	25.9308	44.0834	48.0335
247	9	26.9975	1.30174	874.564	101	0.75	0	20.8375	20.1249	19.413	19.1497	18.784	20.157	20.2309	18.3997	20.718
247	10	28.9942	1.74629	1254.02	101	0.75	0	20.5634	20.1969	19.1282	19.045	20.2963	20.6459	20.6573	19.0382	19.9613
247	11	31.3092	2.3501	1645.22	101	0.75	0	19.5106	18.9855	18.1849	17.7407	19.3505	19.0319	18.8983	17.7742	19.0382
247	12	31.8275	2.44153	1804.21	101	0.75	0	19.5077	19.3038	18.2237	18.2334	17.5186	17.9055	18.0169	17.9692	18.3424
247	13	32.615	2.59358	1830.78	101	0.75	0	18.8624	19.5924	19.3404	17.3133	21.2209	33.4523	22.2942	31.2592	31.1808
247	14	32.6008	2.48635	2073.71	101	0.75	0	19.6186	36.0576	56.4702	18.7062	29.2848	75.6659	40.2304	94.018	109.709
247	15	30.78	1.99867	1271.32	101	0.75	0	19.0866	35.3358	57.7065	18.5125	28.8618	76.0749	39.7112	93.648	108.221
247	16	26.6983	1.1151	204.473	101	0.75	0	18.3377	28.5443	43.5534	18.0354	22.9695	42.1916	27.7246	56.0415	64.0877
247	17	25.2392	0.903679	23.017	101	0.75	0	15.8569	15.4718	14.887	14.0015	14.7818	15.1037	16.7575	14.6394	15.3863
247	18	24.43	0.764135	1.30097	101	0.75	0	15.5421	14.5305	14.1421	13.349	13.418	14.6872	15.2713	13.8246	14.6277
247	19	23.7467	0.62694	1.0229	101	0.75	0	15.4033	15.253	15.1473	15.0755	14.743	15.901	16.883	15.1138	15.3495
247	20	23.1883	0.543538	1.03177	101	0.75	0	16.7749	15.7032	15.7195	15.7632	14.9223	16.292	16.1921	15.1155	15.8969
247	21	22.8425	0.539569	1.03824	101	0.75	0	17.1465	16.073	15.9064	16.219	15.4381	15.9289	16.7162	15.4194	16.0038
247	22	22.3942	0.405394	1.04443	101	0.75	0	16.7239	16.3883	15.661	15.9143	15.3785	16.0307	16.2364	16.0665	15.672
247	23	21.2867	0.137044	1.06132	101	0.75	0	13.8616	13.6539	13.6655	13.6339	14.4027	14.4782	13.3627	12.9386	13.6989
248	0	21.1642	0.130588	1.06438	101	0.75	0	15.5948	17.1262	15.0817	15.0505	15.5113	15.6671	14.9412	15.0847	15.1469
248	1	20.945	0.0955546	1.06708	101	0.75	0	12.3821	11.6311	10.3331	10.4322	10.4109	10.0415	10.1437	10.2406	10.8045
248	2	20.6908	0.108514	1.07179	101	0.75	0	12.5214	11.3101	8.67326	6.95971	9.18153	10.5394	9.46895	10.4179	9.2117
248	3	20.2583	0.0917056	1.07888	101	0.75	0	2.25665	2.72841	2.41326	2.05334	1.92167	1.97351	1.90535	1.51018	1.93894
248	4	20.1592	0.0811999	1.07979	101	0.75	0	0.96702	1.21669	0.499018	1.15929	0.653113	1.18623	1.14407	1.10536	1.68123
248	5	19.8658	0.0805982	1.08437	101	0.75	0	0.184166	0.458551	0.451664	0.0370777	-0.14188	0.759059	0.0583389	-0.240233	0.215045
248	6	19.2625	0.0741575	4.53429	101	0.75	0	0.966269	0.270306	0.305056	0.187122	0.264364	0.213349	0.19752	0.510106	0.376117
248	7	20.9908	0.161978	80.6927	101	0.75	0	9.86237	10.6746	11.4802	9.24131	9.83781	10.9656	12.0615	10.622	10.7591
248	8	23.3108	0.482127	298.56	101	0.75	0	16.1621	32.4939	61.7943	14.8396	25.3618	71.183	32.9728	84.6462	111.253
248	9	26.3558	0.980312	917.857	101	0.75	0	18.1628	28.6585	44.7288	17.0927	23.8014	43.4104	25.7365	55.4474	70.3604
248	10	30.56	1.90296	1627.82	101	0.75	0	19.9879	18.4517	18.5795	17.7501	18.5657	19.5376	17.7375	17.8004	18.8484
248	11	27.8192	1.44898	872.865	101	0.75	0	21.0298	19.2959	19.0106	19.3233	17.9422	19.7527	18.7618	18.4093	18.7121
248	12	28.2975	1.5926	902.349	101	0.75	0	18.5139	19.4702	19.1997	18.6529	17.8728	18.5874	18.1086	17.8637	17.925
248	13	28.4658	1.67335	841.503	101	0.75	0	20.436	19.6635	19.7628	18.7922	18.0508	18.4327	18.1644	17.1784	19.2957
248	14	27.53	1.40347	577.702	101	0.75	0	20.234	19.8794	20.3171	19.6639	18.9347	19.4398	19.4046	19.2636	19.4975
248	15	27.4633	1.40607	622.982	101	0.75	0	18.7607	18.347	19.1986	17.9883	17.7609	18.0304	17.4826	17.2836	18.3643
248	16	26.6267	1.2374	215.985	101	0.75	0	17.633	17.2772	17.7064	16.7891	16.8083	18.0348	17.2998	17.1958	17.3785
248	17	24.9275	0.924077	36.9025	101	0.75	0	15.8569	15.4718	14.887	14.0015	14.7818	15.1037	16.7575	14.6394	15.3863
248	18	22.54	0.415873	1.30068	101	0.75	0	15.5421	14.5305	14.1421	13.349	13.418	14.6872	15.2713	13.8246	14.6277
248	19	21.8158	0.280151	1.05292	101	0.75	0	15.4033	15.253	15.1473	15.0755	14.743	15.901	16.883	15.1138	15.3495
248	20	21.5575	0.326725	1.0615	101	0.75	0	16.7749	15.7032	15.7195	15.7632	14.9223	16.292	16.1921	15.1155	15.8969
248	21	20.2908	0.206687	1.0758	101	0.75	0	17.1465	16.073	15.9064	16.219	15.4381	15.9289	16.7162	15.4194	16.0038
248	22	19.7125	0.131023	1.08566	101	0.75	0	16.7239	16.3883	15.661	15.9143	15.3785	16.0307	16.2364	16.0665	15.672
248	23	20.3725	0.158075	1.0756	101	0.75	0	13.8616	13.6539	13.6655	13.6339	14.4027	14.4782	13.3627	12.9386	13.6989
249	0	20.1042	0.138693	1.07906	101	0.75	0	15.5948	17.1262	15.0817	15.0505	15.5113	15.6671	14.9412	15.0847	15.1469
249	1	19.9867	0.15807	1.08217	101	0.75	0	12.3821	11.6311	10.3331	10.4322	10.4109	10.0415	10.1437	10.2406	10.8045
249	2	19.0433	0.111145	1.09525	101	0.75	0	12.5214	11.3101	8.67326	6.95971	9.18153	10.5394	9.46895	10.4179	9.2117
249	3	18.2883	0.0926105	1.10866	101	0.75	0	2.25665	2.72841	2.41326	2.05334	1.92167	1.97351	1.90535	1.51018	1.93894
249	4	17.8025	0.0791968	1.11789	101	0.75	0	0.96702	1.21669	0.499018	1.15929	0.653113	1.18623	1.14407	1.10536	1.68123
249	5	17.525	0.0713412	1.12243	101	0.75	0	0.184166	0.458551	0.451664	0.0370777	-0.14188	0.759059	0.0583389	-0.240233	0.215045
249	6	17.4558	0.0673149	5.37155	101	0.75	0	0.966269	0.270306	0.305056	0.187122	0.264364	0.213349	0.19752	0.510106	0.376117
249	7	21.5283	0.399665	203.12	101	0.75	0	9.82771	10.4709	10.829	9.19377	9.83781	10.8579	12.0632	10.622	10.7591
249	8	26.1533	1.11155	515.37	101	0.75	0	19.3728	33.2751	51.632	18.2393	27.5727	67.1325	34.4359	71.5409	112.267
249	9	28.4108	1.55416	1251.77	101	0.75	0	21.2777	35.512	52.9874	20.2518	30.0703	72.4925	39.7252	88.9002	119.689
249	10	30.995	2.17378	1627.19	101	0.75	0	23.0336	38.5858	55.0821	21.6514	31.4411	74.7062	41.6603	95.5917	119.447
249	11	32.1242	2.4434	2010.14	101	0.75	0	23.1473	38.6106	53.4327	22.3687	31.8747	76.6768	42.8985	94.6925	117.682
249	12	32.0367	2.407	2053.68	101	0.75	0	23.0873	38.635	54.6762	22.665	31.7272	72.2416	43.4659	91.1814	122.531
249	13	32.4458	2.5074	1920.32	101	0.75	0	22.4068	37.4718	55.3208	22.1381	31.6781	71.4059	39.1661	92.4535	121.351
249	14	30.2958	1.97143	947.672	101	0.75	0	22.2756	37.1511	53.9358	21.5386	30.4149	65.5114	36.8706	90.1489	124.406
249	15	27.0292	1.21443	327.17	101	0.75	0	22.442	37.8991	55.7084	20.9684	30.996	70.9994	38.795	99.3223	123.172
249	16	25.7692	1.06173	74.2854	101	0.75	0	20.3698	30.12	42.0075	19.7925	24.2661	40.0201	27.5932	58.6905	73.2776
249	17	25.4567	1.02873	19.2128	101	0.75	0	19.8975	18.143	18.9605	18.0543	18.9418	19.3957	17.9298	18.3421	18.0382
249	18	24.4792	0.869052	1.39931	101	0.75	0	21.001	19.1608	20.1815	19.5483	19.3453	19.4701	18.366	18.0239	18.3138
249	19	23.675	0.713044	1.02846	101	0.75	0	20.5937	18.3093	18.8549	17.5376	19.7281	19.4254	18.5959	17.7206	17.929
249	20	21.9233	0.232246	1.05471	101	0.75	0	12.1628	11.4655	11.8746	11.3494	11.7278	11.8165	12.1565	11.8273	11.9425
249	21	21.5942	0.276432	1.0624	101	0.75	0	12.7594	14.8622	13.6718	12.699	12.2031	14.1436	13.5702	13.9638	12.6909
249	22	21.6692	0.365525	1.0633	101	0.75	0	14.5675	13.1341	13.4689	14.7393	12.2429	12.3262	12.9427	11.4955	10.2873
249	23	19.7625	0.154821	1.08732	101	0.75	0	3.67554	3.33774	2.77205	3.59567	3.88377	4.56942	4.01855	3.16594	2.89369
250	0	18.8058	0.11174	1.10324	101	0.75	0	1.95596	2.10633	1.74357	1.45046	2.00099	1.63186	1.82553	1.48794	0.825408
250	1	18.3533	0.0959555	1.11072	101	0.75	0	1.65775	1.50553	2.3636	1.23239	1.39714	0.641724	1.98178	1.17093	1.42095
250	2	18.0717	0.0880222	1.11562	101	0.75	0	2.0135	1.69875	1.47447	1.6737	1.28334	1.53374	1.41163	1.12132	0.256667
250	3	17.8167	0.0827536	1.12035	101	0.75	0	1.31235	1.38618	1.4955	1.37667	0.731421	1.39389	1.30792	1.19944	1.08626
250	4	17.5625	0.0770349	1.12528	101	0.75	0	2.06309	1.89843	1.50664	1.30423	1.30202	1.44221	1.29054	0.966809	0.853346
250	5	17.6808	0.0697803	1.12281	101	0.75	0	1.90547	1.82797	0.765091	1.17975	0.634973	1.83502	0.738683	0.766111	0.702537
250	6	17.945	0.0701953	5.78184	101	0.75	0	2.49867	3.98971	3.06907	1.66343	1.62819	2.2643	3.90338	1.92469	3.46043
250	7	22.5383	0.552122	230.081	101	0.75	0	15.0369	16.0102	16.9886	16.0017	16.355	15.8733	15.3836	14.7204	15.1169
250	8	26.6558	1.22345	528.51	101	0.75	0	21.1764	35.0401	51.4915	20.3709	28.5012	61.8913	33.854	84.3314	115.482
250	9	29.1517	1.77483	1564.39	101	0.75	0	22.3639	37.1802	54.1776	22.8496	30.9859	69.8669	38.233	94.4724	122.314
250	10	30.8425	2.31214	1741.51	101	0.75	0	24.8605	37.9627	54.7402	23.2604	32.1034	65.4254	39.1636	92.8486	126.095
250	11	30.5558	2.35352	1560.74	101	0.75	0	25.6245	38.5975	55.2762	23.6516	32.7145	67.1443	39.5412	100.816	121.856
250	12	31.5183	2.69609	2001.24	101	0.75	0	25.3609	39.1675	54.6076	24.9351	32.4943	70.6027	39.9555	94.1754	121.564
250	13	32.2767	2.90563	2030.52	101	0.75	0	25.7367	39.1747	56.839	24.962	33.6789	69.999	40.1379	99.6296	123.286
250	14	32.775	2.94834	2029.59	101	0.75	0	23.8357	37.0916	54.8965	22.2126	31.8987	68.0338	38.9756	100.547	122.941
250	15	32.63	2.83673	1636.12	101	0.75	0	21.9679	36.041	54.5429	21.2075	30.256	67.8543	38.3591	100.907	124.791
250	16	30.8525	2.37833	605.809	101	0.75	0	22.1762	30.3311	41.9143	20.7275	26.5917	39.5541	27.5108	58.3467	75.9209
250	17	27.0383	1.58477	46.969	101	0.75	0	20.0738	19.3259	19.9442	20.1451	19.6605	19.9909	18.4903	18.431	18.4387
250	18	24.7408	1.0381	1.73427	101	0.75	0	19.8456	18.7165	19.6554	18.835	17.973	19.4362	17.5331	17.8859	17.478
250	19	24.2592	0.915638	1.02118	101	0.75	0	19.0979	18.4158	18.7762	18.0707	18.1581	19.2815	18.4261	17.3939	17.2568
250	20	23.5342	0.766942	1.03439	101	0.75	0	20.2834	18.4175	19.6246	18.801	18.5071	20.1839	18.6935	17.6676	17.7702
250	21	23.4133	0.751299	1.03544	101	0.75	0	20.6348	18.7319	19.3721	18.6629	18.1795	19.0718	18.1699	17.6208	17.5156
250	22	23.2408	0.683288	1.03719	101	0.75	0	19.9918	19.5963	19.6914	18.4615	18.598	19.8936	17.4484	17.452	17.7582
250	23	21.9875	0.278976	1.0581	101	0.75	0	16.0584	14.5328	15.3537	14.099	13.2537	15.0629	13.5587	14.2614	13.7365
251	0	21.9067	0.313896	1.06438	101	0.75	0	16.1383	14.3679	13.2928	14.7546	12.5535	13.4409	13.0957	14.0892	13.7551
251	1	21.6533	0.293496	1.06654	101	0.75	0	16.6999	15.2747	15.0135	15.733	15.1059	14.8017	13.8191	14.165	13.3622
251	2	21.8158	0.290277	1.06186	101	0.75	0	17.0526	15.4462	15.7802	15.2151	15.316	15.1436	14.5325	14.2745	14.6867
251	3	21.3183	0.161593	1.06492	101	0.75	0	14.8232	15.1803	14.5105	13.7562	15.1615	14.5961	14.0373	13.6975	14.8093
251	4	21.2083	0.17598	1.06762	101	0.75	0	16.775	17.0216	16.5614	15.7036	14.6932	15.0183	14.4185	13.9809	14.5741
251	5	20.8158	0.141675	1.07233	101	0.75	0	18.0799	16.2458	15.7318	14.6207	15.5295	18.0971	16.1287	16.0888	14.7571
251	6	20.895	0.139843	8.94058	101	0.75	0	14.8979	13.477	13.5325	11.9738	13.7507	13.9496	14.7961	14.12	13.3363
251	7	22.0175	0.3076	76.4598	101	0.75	0	17.9455	17.655	18.7231	16.5065	16.631	18.6383	16.6775	16.1572	15.3185
251	8	22.9525	0.392402	358.923	101	0.75	0	18.815	32.93	50.4084	17.3389	25.3775	57.5119	30.6746	82.6392	113.957
251	9	23.2283	0.339847	565.24	101	0.75	0	15.7521	32.5618	52.1838	15.8593	24.902	65.3237	32.2638	100.033	126.458
251	10	27.6675	1.18281	1324.46	101	0.75	0	20.1869	34.0534	50.9172	19.2103	27.8991	64.9496	36.4473	98.3769	125.353
251	11	30.2242	1.91244	1577.91	101	0.75	0	20.3747	34.0061	52.5075	19.2691	28.4126	64.007	35.8478	84.518	119.244
251	12	29.0608	1.70693	1123.16	101	0.75	0	20.4435	24.1312	30.4483	19.5156	23.2304	37.4163	28.0053	51.1264	57.5062
251	13	28.68	1.63765	929.431	101	0.75	0	19.8819	29.5086	41.2055	19.5058	24.665	43.662	30.9417	59.4937	91.5224
251	14	29.3725	1.80797	1173.05	101	0.75	0	21.6386	34.0521	53.4668	20.9585	28.07	61.4835	36.6758	88.5099	112.986
251	15	29.9508	1.91466	943.413	101	0.75	0	21.9679	36.041	54.5429	21.2075	30.256	67.8543	38.3591	100.907	124.791
251	16	26.105	1.12265	159.108	101	0.75	0	22.1762	30.3311	41.9143	20.7275	26.5917	39.5541	27.5108	58.3467	75.9209
251	17	24.2217	0.844986	32.4465	101	0.75	0	20.0738	19.3259	19.9442	20.1451	19.6605	19.9909	18.4903	18.431	18.4387
251	18	23.4967	0.636133	1.47832	101	0.75	0	19.8456	18.7165	19.6554	18.835	17.973	19.4362	17.5331	17.8859	17.478
251	19	23.015	0.539131	1.0367	101	0.75	0	19.0979	18.4158	18.7762	18.0707	18.1581	19.2815	18.4261	17.3939	17.2568
251	20	21.7467	0.316395	1.05953	101	0.75	0	20.2834	18.4175	19.6246	18.801	18.5071	20.1839	18.6935	17.6676	17.7702
251	21	21.7258	0.382543	1.06186	101	0.75	0	20.6348	18.7319	19.3721	18.6629	18.1795	19.0718	18.1699	17.6208	17.5156
251	22	21.8475	0.404184	1.05917	101	0.75	0	19.9918	19.5963	19.6914	18.4615	18.598	19.8936	17.4484	17.452	17.7582
251	23	21.6017	0.271377	1.06582	101	0.75	0	16.0584	14.5328	15.3537	14.099	13.2537	15.0629	13.5587	14.2614	13.7365
252	0	21.9117	0.318452	1.05899	101	0.75	0	16.1383	14.3679	13.2928	14.7546	12.5535	13.4409	13.0957	14.0892	13.7551
252	1	21.8017	0.368494	1.06007	101	0.75	0	16.6999	15.2747	15.0135	15.733	15.1059	14.8017	13.8191	14.165	13.3622
252	2	21.735	0.398155	1.06186	101	0.75	0	17.0526	15.4462	15.7802	15.2151	15.316	15.1436	14.5325	14.2745	14.6867
252	3	21.7867	0.45047	1.05953	101	0.75	0	14.8232	15.1803	14.5105	13.7562	15.1615	14.5961	14.0373	13.6975	14.8093
252	4	21.7892	0.524559	1.05989	101	0.75	0	16.775	17.0216	16.5614	15.7036	14.6932	15.0183	14.4185	13.9809	14.5741
252	5	21.355	0.495349	1.06907	101	0.75	0	18.0799	16.2458	15.7318	14.6207	15.5295	18.0971	16.1287	16.0888	14.7571
252	6	21.3958	0.485758	4.26192	101	0.75	0	14.8979	13.477	13.5325	11.9738	13.7507	13.9496	14.7961	14.12	13.3363
252	7	23.9575	0.827795	171.461	101	0.75	0	17.9455	17.655	18.7231	16.5065	16.5954	18.5682	16.6827	16.1572	15.3185
252	8	25.2908	1.02013	457.976	101	0.75	0	19.9329	33.4891	52.8901	19.9284	25.6251	58.2233	32.8162	74.8467	93.0239
252	9	26.9483	1.2803	1035.57	101	0.75	0	21.6027	35.9782	52.8024	22.5058	28.8718	63.4135	36.9677	89.2332	104.857
252	10	28.2617	1.56255	1122.37	101	0.75	0	23.1817	37.9109	58.2913	24.105	31.4713	68.8373	41.0391	94.6064	112.705
252	11	26.5558	1.18792	901.801	101	0.75	0	23.557	36.4546	56.7565	23.628	30.0482	65.2446	39.8326	93.7757	104.79
252	12	29.335	1.91116	1609.28	101	0.75	0	23.5095	36.6168	55.1262	23.4525	29.8185	68.2261	40.7024	83.2584	100.678
252	13	29.6692	1.98729	1366.14	101	0.75	0	23.5248	36.3438	53.5331	24.1812	31.0232	65.2635	40.6566	91.69	104.528
252	14	29.2717	1.90762	1375.78	101	0.75	0	23.5563	37.1685	55.0287	24.6206	31.1624	64.6852	40.8602	88.2531	103.893
252	15	30.1142	2.06517	1445.26	101	0.75	0	24.6983	36.8985	55.1745	24.5105	30.37	64.4524	40.6736	90.7042	103.173
252	16	26.3833	1.38861	219.756	101	0.75	0	22.6762	30.1828	43.1444	23.7655	26.3835	38.6582	32.0877	50.9807	64.8987
252	17	24.6433	1.167	30.0538	101	0.75	0	21.7556	20.9198	20.7817	22.7289	21.4985	21.5142	23.5893	19.65	19.7806
252	18	23.5183	0.967352	1.76331	101	0.75	0	21.9185	21.4377	19.6102	22.3372	20.6545	20.4964	22.6625	20.3262	19.81
252	19	22.84	0.815549	1.04423	101	0.75	0	21.6519	20.6692	19.8487	21.8215	19.0553	20.2001	20.7614	18.5639	19.1814
252	20	22.3908	0.737705	1.05061	101	0.75	0	19.8	18.3723	18.7328	20.519	18.5899	18.7453	18.4915	18.0382	18.1833
252	21	22.2433	0.676493	1.05328	101	0.75	0	19.1896	17.8643	17.2937	19.9143	17.7194	18.4926	18.0547	17.403	17.1992
252	22	22.32	0.57656	1.04921	101	0.75	0	18.0362	18.2415	17.1845	18.9762	17.9902	18.3774	16.8923	17.1025	16.5506
252	23	20.9475	0.174827	1.06943	101	0.75	0	16.2969	16.3347	15.5107	17.6016	16.2809	17.278	15.3287	14.9479	15.8194
253	0	20.6275	0.164315	1.07451	101	0.75	0	18.0369	16.5996	16.1393	16.7256	15.9932	16.7944	16.5093	15.6589	16.3049
253	1	19.945	0.138271	1.08345	101	0.75	0	11.2968	9.40474	9.59208	11.1929	10.4309	11.6961	10.2545	10.3267	9.86455
253	2	19.9917	0.137283	1.08363	101	0.75	0	10.5471	9.45188	8.78463	10.1457	9.22893	10.6391	9.78429	9.11107	9.87424
253	3	19.7025	0.105849	1.08859	101	0.75	0	7.60398	6.44662	7.93305	7.21638	6.44682	7.28402	5.05719	4.70026	6.01392
253	4	19.06	0.0805619	1.09598	101	0.75	0	1.47837	1.35947	0.838972	1.37337	1.08528	1.99887	1.7847	0.86589	2.21006
253	5	19.295	0.0664798	1.09136	101	0.75	0	1.80374	1.22579	1.03097	1.32211	0.255572	0.904751	1.79886	0.548307	1.18148
253	6	20.0608	0.111482	6.97668	101	0.75	0	9.37773	8.89045	8.07521	8.20198	7.5085	7.71959	6.48221	8.53634	7.0522
253	7	21.7267	0.312043	113.475	101	0.75	0	11.411	11.8445	13.5543	12.7489	11.5228	13.2502	11.9204	10.5342	9.67582
253	8	22.7275	0.525189	253.487	101	0.75	0	15.1003	31.1913	52.9419	16.9678	23.2679	59.4405	28.9015	76.9221	96.6183
253	9	22.1242	0.36037	445.023	101	0.75	0	17.1669	30.753	54.516	17.7396	24.607	61.4113	31.6303	96.3249	114.33
253	10	22.6617	0.364933	627.285	101	0.75	0	17.9396	19.9148	27.9142	18.0059	19.51	20.9427	18.3093	28.6609	35.0266
253	11	22.405	0.298478	511.007	101	0.75	0	16.7737	20.0396	19.3877	18.1339	16.8198	30.1303	21.7945	29.1889	22.8931
253	12	21.9917	0.297125	447.073	101	0.75	0	20.3372	35.0391	52.5218	19.9943	26.5956	62.235	35.0795	84.2197	65.059
253	13	23.6783	0.612931	722.793	101	0.75	0	20.9283	33.9463	53.7237	22.1216	28.666	64.5585	36.4969	85.8863	104.32
253	14	25.3442	0.903821	847.985	101	0.75	0	20.6488	34.4569	56.9356	21.9578	28.7037	64.869	39.1214	86.4063	104.13
253	15	25.42	0.91629	604.165	101	0.75	0	21.2895	33.1981	53.4517	20.8553	27.7382	63.022	38.4025	83.2949	105.921
253	16	22.6117	0.369122	212.613	101	0.75	0	17.8853	25.8787	41.1936	18.9423	21.4726	35.9262	26.031	50.3421	66.5565
253	17	22.0417	0.387125	23.8751	101	0.75	0	17.8145	16.8412	17.1952	17.7348	17.5854	18.2402	20.5379	18.1049	16.9169
253	18	21.3667	0.364025	1.4437	101	0.75	0	20.6003	20.5814	18.8565	20.5927	20.3692	20.825	21.4617	20.1563	19.4299
253	19	20.7967	0.268481	1.06944	101	0.75	0	16.9624	15.33	15.3016	17.4995	14.1066	14.9064	14.7093	14.2181	14.2805
253	20	20.1975	0.158586	1.08107	101	0.75	0	16.0322	15.244	14.9314	17.0507	15.061	15.7222	15.9626	14.8281	14.9749
253	21	19.6058	0.203847	1.09396	101	0.75	0	14.0401	14.0186	13.925	14.7552	10.3659	12.7873	14.1179	13.9432	13.9247
253	22	18.6758	0.136048	1.10735	101	0.75	0	12.9817	11.816	9.42519	11.0638	11.405	12.7374	11.8263	11.1802	11.5822
253	23	19.3225	0.25074	1.10679	101	0.75	0	15.333	14.7306	16.2664	18.0701	15.9811	15.343	14.817	15.7336	15.2709
254	0	18.0975	0.143902	1.11676	101	0.75	0	8.07542	8.3384	8.33992	7.78051	6.86301	5.72941	6.99029	5.57376	7.49493
254	1	17.155	0.086191	1.12929	101	0.75	0	3.85596	3.68239	3.96466	6.30816	4.05972	5.32609	5.5743	3.7726	3.23294
254	2	16.7133	0.0709732	1.1358	101	0.75	0	3.9805	3.77629	3.50266	4.72982	3.54251	2.95975	3.52654	3.5719	2.67246
254	3	16.9633	0.0838145	1.13542	101	0.75	0	10.4269	12.3255	11.6502	10.9295	7.38342	6.98648	8.38694	8.28661	9.1162
254	4	19.2933	0.332242	1.11469	101	0.75	0	21.2012	20.0872	19.3253	20.2208	19.1361	19.37	18.2198	18.5331	19.1067
254	5	19.8	0.424138	1.10081	101	0.75	0	21.5491	20.9279	19.7604	20.8429	20.7573	20.3689	20.2784	20.2601	19.4753
254	6	19.3917	0.360447	7.81412	101	0.75	0	17.0588	17.2892	17.0005	18.5638	16.8317	16.8955	16.1114	13.8406	14.7529
254	7	22.8333	0.869153	199.411	101	0.75	0	17.3064	18.2956	17.9178	19.4735	17.3195	17.8456	16.8011	16.2843	16.3194
254	8	25.8625	1.38333	532.172	101	0.75	0	22.7391	34.5046	52.8126	22.026	28.894	59.3677	31.8951	60.5794	82.0602
254	9	27.0575	1.64992	1555.26	101	0.75	0	24.4525	23.5431	23.6989	24.6069	23.4814	27.608	23.5525	23.5739	22.4966
254	10	28.4875	2.03299	1811.05	101	0.75	0	24.595	24.7562	23.2764	27.2684	25.2417	26.7381	23.4229	23.1471	23.4644
254	11	29.4417	2.04861	1817.19	101	0.75	0	23.68	24.4644	22.3953	22.0419	23.4774	24.1145	24.2516	24.4683	24.9953
254	12	29.5292	2.07668	1528.48	101	0.75	0	24.2285	23.5421	28.9651	22.1795	24.1486	32.8328	29.9812	33.9166	40.5061
254	13	29.4958	2.00508	1521.54	101	0.75	0	23.8746	29.4989	39.7413	22.3107	26.9995	49.9435	32.9574	54.4825	77.0167
254	14	29.5492	2.103	1560.07	101	0.75	0	23.3027	35.4709	49.987	22.5377	29.773	66.7913	35.9219	74.8226	108.803
254	15	26.6992	1.61461	636.556	101	0.75	0	23.0257	37.301	55.7039	21.8697	30.2522	70.2484	39.6412	80.1983	117.756
254	16	27.5133	1.67715	553.663	101	0.75	0	23.1253	31.5254	45.3617	22.01	26.1452	42.7506	31.5188	52.9506	68.2214
254	17	24.71	1.16394	73.8899	101	0.75	0	22.1477	21.865	20.9262	21.4588	21.6631	21.159	22.3207	20.4021	20.4545
254	18	22.8717	0.969337	1.81943	101	0.75	0	22.8087	21.6825	20.178	21.3625	20.3268	20.7563	22.5676	21.2283	19.6897
254	19	21.8825	0.844261	1.06169	101	0.75	0	22.9044	21.5474	20.2669	21.8348	21.131	21.1757	22.6253	20.84	20.2883
254	20	21.2358	0.705996	1.07469	101	0.75	0	22.5032	20.9003	19.6694	20.9571	21.4145	20.002	20.7708	19.7561	19.5497
254	21	19.3208	0.421977	1.09754	101	0.75	0	11.4553	11.8834	11.2365	11.862	12.0046	11.525	11.5979	11.9893	10.4766
254	22	17.165	0.162055	1.12968	101	0.75	0	5.57599	5.79453	5.39765	5.76863	5.94614	5.80338	6.57176	6.30357	5.43036
254	23	16.7133	0.115997	1.14003	101	0.75	0	5.79018	5.1867	5.39121	5.91847	6.11009	5.66834	5.78865	5.71003	5.40527
255	0	17.2508	0.113951	1.13121	101	0.75	0	8.78753	6.49295	6.04318	6.77381	7.3434	6.48008	6.3934	6.2437	6.09346
255	1	17.4367	0.121808	1.1272	101	0.75	0	5.44973	5.89314	4.76557	6.6069	5.56405	4.81835	6.44962	5.46371	5.02526
255	2	16.6383	0.0869015	1.14061	101	0.75	0	4.46267	4.20167	4.42493	4.16532	5.34772	3.86122	4.39668	4.48132	4.14321
255	3	16.3533	0.0749537	1.14603	101	0.75	0	4.59658	4.42583	3.57036	4.31333	4.22054	3.74208	5.33045	4.68316	3.65315
255	4	16.0783	0.0671251	1.15088	101	0.75	0	4.22417	3.77098	3.50807	3.50375	2.89049	3.65671	3.45104	3.53769	3.14342
255	5	15.8717	0.0634243	1.15244	101	0.75	0	3.59511	4.86135	3.85574	4.52645	3.38115	3.31536	3.99702	3.27884	3.42508
255	6	16.1442	0.0615133	9.44555	101	0.75	0	3.46562	3.95037	3.46316	2.81325	3.37518	3.36802	3.51328	3.67282	2.84351
255	7	20.7817	0.43463	217.942	101	0.75	0	8.41212	11.9299	11.5006	8.41961	7.66736	7.52259	6.92094	5.31832	8.64524
255	8	25.4583	1.19195	600.431	101	0.75	0	19.8632	36.9944	57.2022	19.9377	28.2368	69.2147	36.2696	73.3296	107.885
255	9	27.41	1.62825	1639.07	101	0.75	0	22.503	38.1811	56.6094	21.6906	29.6977	72.8733	37.9495	81.3041	117.56
255	10	29.7883	2.25537	1788.93	101	0.75	0	23.8167	37.9853	54.3515	23.0146	31.2884	70.7591	39.5916	87.698	120.824
255	11	31.0308	2.72014	1968.85	101	0.75	0	24.5543	39.6167	53.3155	24.8272	33.2607	74.0516	42.4097	88.5938	120.676
255	12	31.5167	2.80684	2026.08	101	0.75	0	23.7831	38.865	53.9726	24.6113	33.2722	74.0282	43.3814	88.8939	116.837
255	13	31.7108	2.75127	1954.39	101	0.75	0	24.4683	40.3059	53.374	24.3793	33.5529	72.9564	44.4802	91.0693	114.717
255	14	31.7358	2.66023	2024.3	101	0.75	0	23.2999	38.4881	52.379	22.3767	32.4916	72.6784	43.1014	88.5784	114.29
255	15	30.5592	2.35886	1416.37	101	0.75	0	22.4654	37.8179	51.4012	23.2342	32.2212	72.1275	42.4112	88.162	116.918
255	16	29.9708	2.27723	634.865	101	0.75	0	22.0632	29.3507	36.9589	21.7051	26.8083	52.5055	36.9247	71.1529	63.4274
255	17	25.6433	1.24069	40.4323	101	0.75	0	21.9922	21.8284	23.2293	22.283	21.357	22.0066	24.9531	21.397	21.7492
255	18	23.3217	0.848521	1.78585	101	0.75	0	18.8364	18.454	19.7726	18.5368	17.6359	18.5163	20.5528	17.7403	18.0877
255	19	21.9658	0.680413	1.05865	101	0.75	0	14.6216	15.0059	15.5933	14.9535	14.6381	14.0939	15.8902	13.0146	13.4091
255	20	20.3133	0.419033	1.08182	101	0.75	0	11.0419	10.601	11.3726	13.0088	10.4471	10.7827	10.7075	10.8791	11.1589
255	21	18.9967	0.227823	1.10194	101	0.75	0	7.05829	7.6605	7.37007	7.4556	6.79588	6.4409	6.83028	6.49715	5.48089
255	22	18.3733	0.154176	1.11223	101	0.75	0	4.89718	4.22932	5.69235	4.25661	4.57397	3.17158	4.79953	4.11441	4.01216
255	23	19.0258	0.207736	1.10867	101	0.75	0	7.77019	6.9841	7.85756	8.02587	8.44914	6.99082	8.32579	8.85805	7.95234
256	0	19.1533	0.187876	1.10119	101	0.75	0	5.49816	6.00312	5.67525	4.87268	5.56058	6.508	5.94532	5.24593	3.96779
256	1	18.9633	0.148655	1.10342	101	0.75	0	5.45945	6.69674	5.53555	4.11773	4.9292	4.30387	4.73956	3.83912	3.3939
256	2	18.9258	0.125255	1.10436	101	0.75	0	7.43501	9.33424	8.28091	8.9565	8.27792	8.93775	8.37674	7.92024	7.36388
256	3	19.7033	0.201627	1.09747	101	0.75	0	16.796	16.0591	15.9682	14.5841	13.1096	11.8026	14.2072	12.0146	14.1378
256	4	19.3717	0.13039	1.09598	101	0.75	0	12.3437	13.4126	12.4089	10.5329	12.3451	11.3907	13.8674	11.7812	11.4824
256	5	18.6217	0.0966109	1.1066	101	0.75	0	6.56523	6.90577	8.46051	5.22797	7.77778	6.28137	7.23899	7.1052	6.01838
256	6	18.3642	0.0917743	10.0298	101	0.75	0	7.71056	8.28756	8.40349	6.79617	4.61516	5.54947	5.40943	4.90147	6.18678
256	7	22.085	0.580244	227.166	101	0.75	0	16.3205	15.5248	17.6929	15.5252	15.4643	17.8701	15.7279	18.5693	17.3842
256	8	25.1825	1.11272	593.277	101	0.75	0	20.8902	34.5789	44.726	21.0593	30.9355	70.8494	37.9087	78.3767	116.456
256	9	27.2867	1.46231	1683.38	101	0.75	0	21.7684	37.1341	47.8847	22.382	30.349	67.5354	38.6951	81.4909	111.12
256	10	29.0683	1.84254	1786.11	101	0.75	0	22.3123	37.5068	49.5025	22.7545	31.145	66.6759	39.8092	80.4943	116.016
256	11	30.3792	2.21036	1687.83	101	0.75	0	23.3417	37.783	51.1375	23.5841	32.4967	70.194	41.7741	86.9305	116.881
256	12	29.5033	2.08644	1214.14	101	0.75	0	23.1293	37.8919	51.0762	23.881	31.9857	70.464	42.4474	87.03	116.207
256	13	30.2508	2.26406	1653.49	101	0.75	0	23.4042	37.799	50.9123	24.0277	32.8524	69.4585	41.8016	84.6961	115.529
256	14	29.0925	1.97109	1126.84	101	0.75	0	24.1442	39.5638	51.1161	24.592	33.5476	70.5789	43.758	84.9201	119.849
256	15	29.5925	2.09002	1541.68	101	0.75	0	23.6518	37.7532	50.5645	23.9729	32.3494	69.4696	41.5551	81.5374	116.879
256	16	28.1925	1.77792	530.441	101	0.75	0	22.4845	29.4035	37.854	22.314	27.1224	48.5784	35.0663	64.3948	66.0527
256	17	24.8983	1.1537	47.6203	101	0.75	0	21.1724	22.0643	23.4131	22.1129	21.6113	20.9621	23.6728	21.4706	20.818
256	18	22.7833	0.80238	1.76014	101	0.75	0	19.2519	18.8501	20.7932	20.0086	18.0063	19.4825	21.1258	17.6185	17.365
256	19	21.8608	0.668557	1.06115	101	0.75	0	18.6911	18.2307	19.8026	19.7994	17.6739	17.3431	17.9229	16.2478	15.2721
256	20	20.8575	0.511351	1.07797	101	0.75	0	18.4799	18.4185	19.2566	19.0018	17.3505	17.8426	19.0231	17.2305	16.4482
256	21	20.8833	0.564736	1.07961	101	0.75	0	19.5271	19.6451	20.2687	19.9844	17.4408	17.9298	17.7558	18.0728	17.3332
256	22	20.5667	0.595988	1.08657	101	0.75	0	18.0297	17.4153	18.675	18.9904	18.0479	18.1482	18.447	17.5833	17.9062
256	23	19.7208	0.470319	1.09694	101	0.75	0	11.7875	12.7873	13.1829	12.9792	12.5091	10.8618	12.6284	11.9267	10.1108
257	0	18.1858	0.257214	1.11978	101	0.75	0	10.5255	9.97312	9.97288	10.9357	12.5404	12.8031	12.2562	10.5324	8.17561
257	1	18.1658	0.24809	1.12187	101	0.75	0	11.6181	11.2686	9.54098	8.74061	8.00351	9.78825	8.86677	9.14497	9.08315
257	2	18.4408	0.270896	1.12225	101	0.75	0	11.9907	12.815	15.3225	14.1591	13.3169	12.9663	10.3278	10.7537	10.6191
257	3	18.9858	0.317799	1.11223	101	0.75	0	14.3814	14.2602	12.2806	14.5861	12.1104	12.8551	12.6895	13.17	12.6764
257	4	20.405	0.472371	1.08567	101	0.75	0	16.8692	16.6216	17.8483	16.6665	14.9155	15.4045	14.8007	16.2114	16.092
257	5	20.3558	0.369088	1.08107	101	0.75	0	17.8286	18.3784	19.9251	18.1025	17.314	17.7446	17.8137	17.4667	16.4396
257	6	19.9342	0.232855	5.30538	101	0.75	0	17.7852	17.3701	19.0953	17.5188	17.1831	17.5008	17.3648	16.7176	16.6961
257	7	20.5075	0.241397	89.9323	101	0.75	0	18.3616	18.4773	19.5582	19.3035	19.2022	22.7256	19.9473	21.7458	20.4151
257	8	22.6542	0.478776	565.22	101	0.75	0	18.0433	30.8045	42.2446	18.5723	28.4199	66.1725	34.0007	81.8445	106.431
257	9	21.9925	0.414978	267.889	101	0.75	0	18.2164	32.3706	43.7088	18.146	26.7454	65.2069	34.7337	80.5209	105.729
257	10	21.4367	0.226402	543.778	101	0.75	0	17.0849	32.7976	42.5884	17.7999	26.6168	65.9207	34.3737	80.9648	114.634
257	11	24.98	0.714959	1545.33	101	0.75	0	19.1071	32.8235	45.4655	18.9026	27.3887	66.3504	35.1982	80.4446	109.782
257	12	22.8425	0.398662	467.899	101	0.75	0	18.9872	32.2438	46.4849	19.0961	27.6003	68.8155	36.499	78.7883	107.843
257	13	23.6983	0.535631	698.174	101	0.75	0	18.6084	32.9423	45.8298	19.2552	27.1002	64.4385	35.28	88.0094	115.495
257	14	25.2833	0.828385	787.239	101	0.75	0	18.4085	32.1479	44.6821	18.925	27.0196	65.9844	36.2173	84.3409	114.373
257	15	23.89	0.594969	499.047	101	0.75	0	17.4933	32.5123	43.2144	17.703	25.8582	67.398	34.0748	84.9214	118.45
257	16	24.1267	0.713416	266.328	101	0.75	0	17.6791	25.4277	31.4359	17.4109	22.0746	47.6169	28.1327	57.268	60.771
257	17	23.3517	0.664685	41.2129	101	0.75	0	16.4168	15.4595	16.6418	15.9582	15.4934	15.8167	18.5096	15.185	15.8716
257	18	21.5908	0.35056	1.6626	101	0.75	0	17.1967	16.1946	16.3049	16.5704	16.6653	16.6246	19.1211	17.079	15.9722
257	19	21.0625	0.264975	1.07378	101	0.75	0	16.0022	16.3522	17.6716	16.0389	15.8366	16.2966	18.0475	15.6267	14.9837
257	20	21.2117	0.284635	1.06835	101	0.75	0	16.0054	16.0357	17.2439	16.3211	15.7205	16.5187	18.1985	15.3983	15.011
257	21	20.5708	0.167782	1.07778	101	0.75	0	16.7157	17.4432	17.5732	16.4284	16.7271	16.586	17.8206	15.7462	14.931
257	22	20.7108	0.191316	1.07742	101	0.75	0	18.3439	18.8469	18.1548	17.166	18.1254	17.8608	17.3301	17.3559	16.8693
257	23	21.1008	0.253147	1.07233	101	0.75	0	18.8983	18.2206	19.6486	18.9302	19.0536	18.3844	19.1395	17.737	17.8094
258	0	20.1725	0.103587	1.08016	101	0.75	0	13.4659	13.6884	16.1449	13.6632	14.1645	13.7013	14.1361	14.3108	14.1447
258	1	20.0208	0.142594	1.08492	101	0.75	0	18.0339	18.2568	19.2694	18.2191	18.8024	18.1135	19.1126	17.8075	18.2812
258	2	19.6933	0.151894	1.09025	101	0.75	0	19.629	19.5934	21.3933	19.745	19.2324	19.5177	19.4079	18.4125	17.5141
258	3	19.6808	0.131258	1.09117	101	0.75	0	15.1462	14.4485	15.589	15.0008	14.8802	13.3042	13.4161	12.5833	11.3402
258	4	19.7717	0.127509	1.09339	101	0.75	0	17.6908	17.6401	19.9137	18.5473	18.887	17.9042	18.5082	16.8513	15.9961
258	5	20.0408	0.164186	1.09339	101	0.75	0	17.7881	16.3716	19.3222	18.3906	18.88	18.2529	17.0954	15.7729	14.9643
258	6	20.09	0.140356	10.2894	101	0.75	0	17.3923	17.5849	18.8775	17.9447	17.9465	17.8666	17.7076	17.7748	16.6082
258	7	20.7983	0.191819	121.355	101	0.75	0	17.5027	18.2983	18.9502	18.3315	18.5856	21.3863	18.0477	18.3978	18.6331
258	8	22.1867	0.344502	636.661	101	0.75	0	18.3877	31.0434	41.7141	19.3511	27.4591	68.0242	33.0501	78.8499	108.691
258	9	25.1458	0.763758	1250	101	0.75	0	19.5426	34.5256	43.8051	19.3559	28.7482	65.4681	33.9692	79.3338	112.056
258	10	27.46	1.24005	1676.17	101	0.75	0	20.6905	34.5078	47.3174	20.431	29.2232	64.2799	35.8402	73.8984	110.699
258	11	27.0342	1.252	906.703	101	0.75	0	20.3691	33.9934	45.5242	20.1301	28.3818	66.4236	36.481	77.4773	111.348
258	12	26.8675	1.18766	1458.14	101	0.75	0	20.5698	34.2371	44.3439	19.3418	28.6472	63.9217	37.6999	85.7817	110.135
258	13	25.8942	0.925027	1123.66	101	0.75	0	19.5963	33.0204	44.9284	19.1136	27.9315	63.5656	35.5965	74.6273	111.857
258	14	27.6683	1.30127	1157.1	101	0.75	0	19.8493	33.5136	42.3883	19.4953	28.6501	63.5838	36.6425	76.2973	112.343
258	15	25.6592	0.992875	544.318	101	0.75	0	18.3612	33.1235	44.1914	18.697	26.13	62.1982	34.8016	79.8482	110.075
258	16	22.425	0.36559	192.97	101	0.75	0	17.3792	24.2631	30.7882	17.4108	20.8433	45.2939	27.5674	61.0107	57.9835
258	17	22.1792	0.454483	45.0247	101	0.75	0	17.5519	16.5126	19.0129	16.9548	16.5239	15.8598	18.4392	14.8062	14.7946
258	18	21.6567	0.45328	1.62051	101	0.75	0	16.0306	16.7144	17.8725	14.908	15.4184	13.9313	17.2521	15.3649	14.78
258	19	21.4683	0.449328	1.07433	101	0.75	0	17.8945	16.9971	18.6608	18.1442	17.8976	16.8515	17.677	16.3873	16.9925
258	20	21.5592	0.448075	1.07142	101	0.75	0	16.5858	16.1987	17.9181	17.4673	16.6105	16.1362	17.4548	16.0316	15.1635
258	21	21.415	0.386908	1.07779	101	0.75	0	15.4353	15.7834	16.4343	15.5636	15.1448	14.6217	15.1466	14.4701	13.866
258	22	20.5658	0.167511	1.08712	101	0.75	0	16.6962	16.7136	17.4962	15.1845	15.6209	14.8323	14.665	14.9397	14.3464
258	23	20.095	0.115236	1.09136	101	0.75	0	16.3156	16.1799	16.7436	16.1194	15.6444	15.029	15.3431	13.9762	14.6531
259	0	20.1142	0.118929	1.09339	101	0.75	0	16.869	15.2441	15.3952	15.1299	14.2364	13.5695	13.5978	13.804	12.7421
259	1	20.1217	0.13263	1.09487	101	0.75	0	15.1849	14.7865	16.1934	15.1417	15.4227	14.9384	13.9518	14.3201	12.9226
259	2	20.2325	0.246863	1.09524	101	0.75	0	17.9855	16.4276	17.5233	17.6446	17.6126	17.3935	17.7769	18.176	17.5817
259	3	20.1475	0.229535	1.09617	101	0.75	0	20.7371	19.4952	21.0142	20.0887	20.292	19.3454	19.8577	18.696	18.3316
259	4	20.4158	0.278479	1.09154	101	0.75	0	19.9683	19.2936	20.3328	19.0746	17.9954	18.9587	18.9246	18.1186	17.6354
259	5	19.8317	0.174352	1.10156	101	0.75	0	19.3683	18.7565	20.1347	20.0362	20.2278	18.8987	19.8006	18.7853	18.1155
259	6	20.0375	0.191126	8.77963	101	0.75	0	14.546	13.8941	13.4894	12.4554	13.1582	13.2009	12.2661	12.9364	12.0756
259	7	21.8833	0.415157	192.829	101	0.75	0	14.6453	15.6294	15.103	14.4465	15.3785	16.9987	12.8978	14.5041	15.722
259	8	24.885	0.87456	619.424	101	0.75	0	20.3478	31.5955	42.1716	19.7555	29.4046	69.4958	35.0362	78.5992	112.857
259	9	25.1142	0.87507	930.42	101	0.75	0	20.2861	34.3884	46.5804	19.8154	28.9236	67.3596	35.6297	80.3514	114.128
259	10	28.2092	1.38627	1750.63	101	0.75	0	21.5616	33.8428	47.4913	20.4959	29.1518	64.1502	36.6162	76.457	113.906
259	11	29.3108	1.6415	1673.44	101	0.75	0	21.2204	26.3217	33.7303	20.7421	25.0423	34.2091	25.5451	40.48	57.3116
259	12	30.3908	1.95588	1861.31	101	0.75	0	20.5338	22.8508	25.0381	20.0854	19.9342	23.4934	22.2294	22.2258	21.9055
259	13	30.2683	1.9872	1504.99	101	0.75	0	20.5161	33.9801	46.5035	20.9737	28.1384	57.3021	36.062	75.6341	107.434
259	14	29.9242	1.93059	1514.76	101	0.75	0	20.3207	33.3417	43.3861	20.6602	28.5822	60.6965	35.0974	76.1742	108.465
259	15	29.065	1.79355	1068.58	101	0.75	0	20.0909	32.7189	43.1067	20.5155	27.633	61.6798	35.5117	79.4681	108.687
259	16	26.0842	1.19523	242.269	101	0.75	0	18.9387	24.362	29.9558	18.4688	22.8751	44.5116	29.4242	58.6464	59.7622
259	17	24.6533	0.948464	32.5412	101	0.75	0	17.5385	16.1227	18.7962	18.4117	17.0059	17.4412	18.4679	16.5009	16.7271
259	18	23.355	0.688486	1.73942	101	0.75	0	17.3583	16.8059	18.7492	18.5	17.3728	17.9818	18.7187	16.9707	16.766
259	19	22.1175	0.475641	1.05417	101	0.75	0	18.4019	16.3949	18.2831	17.7008	15.1432	16.4575	17.7433	16.5274	16.776
259	20	21.8242	0.505232	1.06421	101	0.75	0	18.7964	17.5902	20.0263	19.2909	17.9941	18.6911	18.2193	17.3637	17.6213
259	21	21.38	0.389246	1.07306	101	0.75	0	13.1444	13.8943	15.4907	14.0125	13.4708	14.7852	14.4802	13.7629	13.7496
259	22	20.6733	0.230708	1.08621	101	0.75	0	17.3204	16.4423	18.6408	18.4441	17.3236	16.9078	16.2485	15.7525	14.9845
259	23	20.6725	0.252919	1.0897	101	0.75	0	14.48	15.1796	14.4743	15.3468	13.9403	12.5422	15.0116	13.031	10.6511
260	0	20.7225	0.216517	1.0921	101	0.75	0	15.4384	15.9056	17.616	17.4526	16.7878	15.5865	15.2597	14.4525	14.0074
260	1	20.9608	0.252751	1.09099	101	0.75	0	15.7117	14.7648	17.864	17.8086	15.915	15.6304	15.6312	15.6125	15.8273
260	2	20.3083	0.181832	1.10362	101	0.75	0	13.2649	11.5351	11.3655	10.8964	10.3071	10.505	9.87904	11.8047	12.6602
260	3	20.2008	0.187224	1.10791	101	0.75	0	15.2074	15.0434	15.6075	14.0057	13.433	14.1056	12.2064	11.4689	10.9899
260	4	19.5325	0.102906	1.11355	101	0.75	0	9.06832	9.36658	10.5921	6.60655	7.41305	8.59221	10.0544	6.90138	7.6631
260	5	18.965	0.0718885	1.12186	101	0.75	0	2.73271	2.45086	3.5069	2.40573	2.78012	2.57743	2.15987	3.6238	2.17925
260	6	19.7558	0.113077	22.412	101	0.75	0	9.48946	8.53082	9.53984	8.82993	8.75075	7.66809	9.15436	10.1711	8.90702
260	7	23.5308	0.588334	242.441	101	0.75	0	15.9559	15.6929	17.4355	16.9736	16.4529	20.3761	16.6335	15.9957	15.3804
260	8	26.2817	1.05614	552.644	101	0.75	0	17.0625	29.8252	37.953	17.4517	26.0459	64.2358	32.9722	78.6802	109.29
260	9	27.6217	1.28246	1248.14	101	0.75	0	18.1505	32.2678	42.9921	18.719	26.6716	60.0987	33.8705	80.0772	112.137
260	10	27.7175	1.31506	1089.67	101	0.75	0	18.2724	33.0939	45.9119	18.5507	26.8127	56.8232	34.2137	87.7629	113.992
260	11	30.3717	1.88463	1629.33	101	0.75	0	19.3585	31.8774	44.576	19.1523	26.4245	58.2834	36.1576	79.5775	113.291
260	12	28.9617	1.60813	994.364	101	0.75	0	17.5744	32.2214	45.4039	18.253	25.8727	57.2051	35.4557	81.2496	107.203
260	13	30.0225	1.84171	1432.76	101	0.75	0	16.8569	30.776	41.3038	17.5407	25.1596	55.976	33.9993	80.2193	110.616
260	14	31.0583	2.0587	1598.91	101	0.75	0	16.0106	30.4422	41.4424	16.3571	24.2008	55.3459	34.4284	74.9287	108.283
260	15	29.065	1.63275	942.493	101	0.75	0	15.5094	29.6844	40.6025	16.1623	23.8194	59.6984	33.9304	79.5411	109.396
260	16	27.4492	1.32038	484.6	101	0.75	0	14.5138	20.6784	28.3861	15.3778	19.0625	39.5136	26.907	56.0001	56.801
260	17	25.8458	1.05632	78.2997	101	0.75	0	13.4911	12.8663	14.1479	13.5304	13.2099	13.0691	15.9637	11.5663	13.0263
260	18	24.5725	0.804233	1.78737	101	0.75	0	12.7501	12.2068	13.3334	13.5863	12.0103	12.3676	14.6355	11.6823	11.6015
260	19	23.7058	0.635044	1.03562	101	0.75	0	13.2411	12.4573	14.8678	13.8893	12.7306	13.4692	14.2623	13.2827	12.6362
260	20	23.3425	0.548475	1.04123	101	0.75	0	13.4265	12.5507	13.7987	13.736	12.698	12.9818	13.4862	12.8472	12.6976
260	21	23.3158	0.526464	1.04264	101	0.75	0	13.0417	12.9251	13.5934	13.4957	11.6698	12.5098	12.6108	12.2167	11.6748
260	22	22.4275	0.238691	1.05971	101	0.75	0	10.8159	10.8824	12.0412	11.2339	9.79249	11.0684	10.5648	9.61619	9.23897
260	23	22.3383	0.229751	1.06402	101	0.75	0	11.4535	9.81608	11.0448	10.6321	10.3488	10.565	10.6472	9.65193	9.3628
261	0	22.675	0.297733	1.06025	101	0.75	0	11.8598	11.7508	12.7111	11.0297	10.7333	10.8475	11.9184	10.5275	10.4724
261	1	22.9717	0.341698	1.05417	101	0.75	0	11.8494	11.9406	13.3297	12.557	12.2107	11.9656	12.1586	11.8913	11.3037
261	2	22.7775	0.295301	1.05649	101	0.75	0	12.4718	12.6523	13.9142	13.1051	11.9046	12.0921	12.4571	11.9678	11.4554
261	3	22.5017	0.202573	1.05882	101	0.75	0	11.0793	11.2783	11.9343	11.5954	10.9482	11.1077	11.1591	10.7826	10.0998
261	4	22.195	0.155178	1.07378	101	0.75	0	12.2858	11.6261	12.5814	13.0636	11.8181	12.0317	11.9929	10.9462	11.1591
261	5	22.1942	0.164558	1.07324	101	0.75	0	12.2257	12.7415	12.7653	12.9969	11.9403	12.3447	11.6211	11.275	11.3972
261	6	21.8333	0.120379	2.64257	101	0.75	0	11.3662	11.2864	11.8986	11.5815	11.6492	11.5494	10.8849	10.6477	10.4848
261	7	21.81	0.114437	30.8457	101	0.75	0	12.3264	11.9703	12.7011	11.7042	13.1119	15.1583	12.7704	14.3549	13.5789
261	8	22.3292	0.13042	104.538	101	0.75	0	11.6586	26.5122	33.9042	12.4765	21.3801	54.5244	26.8341	79.8063	114.012
261	9	23.0142	0.170134	178.422	101	0.75	0	11.0749	26.8531	35.934	12.183	19.9196	59.092	26.6065	79.0558	109.652
261	10	23.5058	0.171387	219.364	101	0.75	0	12.2776	29.3887	36.3189	12.1088	20.1301	60.7325	28.8996	85.7527	114.815
261	11	24.2017	0.25474	379.992	101	0.75	0	11.2054	27.0965	38.4156	11.7535	20.5104	61.0257	28.3518	81.2009	112.491
261	12	23.815	0.189407	226.286	101	0.75	0	10.8703	27.6607	36.1435	12.2888	20.7319	59.8537	29.0418	79.4365	117.243
261	13	23.5933	0.15953	129.96	101	0.75	0	9.65884	26.2021	36.182	10.6112	19.208	59.5237	28.178	81.2033	117.114
261	14	23.4583	0.169367	88.5987	101	0.75	0	10.3399	26.0956	34.4002	10.5283	20.5915	59.3494	27.4675	81.4478	119.042
261	15	23.2892	0.144126	73.4863	101	0.75	0	9.99601	26.2673	35.1543	10.6865	19.0158	63.3847	29.0023	83.724	115.331
261	16	23.1075	0.137197	33.0876	101	0.75	0	9.57712	17.9393	25.1065	10.6792	15.6583	40.2287	20.9363	58.422	61.1997
261	17	22.8875	0.118223	4.08952	101	0.75	0	8.07019	7.80573	8.15262	7.90409	8.01393	7.88632	9.01605	7.31309	7.29949
261	18	22.725	0.113094	1.17355	101	0.75	0	6.48109	7.391	7.36151	7.03164	6.95231	6.75865	7.61105	7.33203	7.24831
261	19	22.6717	0.147951	1.05328	101	0.75	0	8.86408	9.40231	10.2993	9.80704	8.78052	8.88525	9.63969	9.05318	8.75598
261	20	22.7883	0.190675	1.05345	101	0.75	0	9.24441	9.15316	10.4376	10.5193	9.49899	9.41779	9.85016	8.6122	8.8009
261	21	22.7308	0.206238	1.05274	101	0.75	0	10.3629	10.4569	10.774	10.7891	10.0785	10.5304	10.6638	9.52713	9.42678
261	22	22.7167	0.233906	1.05417	101	0.75	0	9.65932	10.8004	12.2379	11.2458	10.3759	10.6629	10.2187	10.2953	10.0742
261	23	22.7075	0.225974	1.0515	101	0.75	0	8.14027	8.99431	8.82827	7.27794	8.41086	7.24835	8.91495	7.68441	6.74662
262	0	22.5733	0.189239	1.04883	101	0.75	0	9.1513	10.6405	10.8894	10.507	7.43227	7.08047	7.53857	7.86202	7.3394
262	1	22.4708	0.169529	1.05328	101	0.75	0	10.0608	10.9191	11.0377	10.2498	9.58501	9.58964	9.64598	8.91507	9.47733
262	2	22.7192	0.248892	1.05096	101	0.75	0	11.9855	12.1695	11.9927	11.2658	11.4015	10.8755	11.4149	10.3883	10.9046
262	3	22.7517	0.252589	1.04865	101	0.75	0	10.6594	10.4365	11.4197	11.2662	10.291	10.1105	10.8496	9.26613	9.9211
262	4	22.8867	0.295597	1.04617	101	0.75	0	11.5657	11.5689	12.5842	12.8088	11.6861	11.6204	11.5612	10.608	10.242
262	5	22.4108	0.188133	1.04883	101	0.75	0	3.0607	4.1667	6.11427	4.32217	5.0784	4.91947	5.28254	2.40534	1.89335
262	6	21.8808	0.0872744	4.78618	101	0.75	0	2.72742	3.77076	4.85421	3.95024	3.95811	3.34961	3.7377	2.79152	2.70943
262	7	23.645	0.228519	243.211	101	0.75	0	9.88359	9.37488	11.5893	9.62391	11.4138	14.4442	11.233	13.3785	11.9587
262	8	23.7983	0.247024	132.485	101	0.75	0	10.4325	24.9909	32.1609	9.36966	21.0574	61.6807	29.1512	82.3018	110.533
262	9	23.8892	0.269575	412.494	101	0.75	0	12.2134	30.9373	39.5403	13.3203	21.712	63.9735	31.0312	86.4296	115.729
262	10	28.2017	1.09495	1419.95	101	0.75	0	14.2252	30.1961	42.5608	14.9341	23.6596	57.8043	34.2851	84.0564	111.182
262	11	29.98	1.613	1676.44	101	0.75	0	14.9432	30.1185	41.9264	15.1603	23.1547	60.3006	32.227	80.6969	110.814
262	12	28.97	1.38495	1230.4	101	0.75	0	14.4587	30.3398	41.2736	14.9145	23.5235	57.8408	33.6612	82.9407	107.452
262	13	28.9842	1.38511	1208.03	101	0.75	0	14.6839	29.7694	40.9287	14.9807	22.7806	57.1605	33.1234	81.0797	109.095
262	14	26.13	0.839703	444.218	101	0.75	0	14.8091	30.4324	38.2189	14.8788	23.37	59.1256	33.7482	83.3503	107.896
262	15	23.7017	0.331193	246.202	101	0.75	0	13.1386	29.6622	39.5474	15.6364	23.0553	62.5078	30.9717	77.515	109.794
262	16	24.1925	0.566579	301.321	101	0.75	0	13.9621	19.141	27.5112	13.3938	18.156	40.9711	24.1239	57.9033	57.4442
262	17	23.7417	0.543378	51.7884	101	0.75	0	12.7857	12.2032	12.895	13.3564	12.0598	11.3613	14.2555	11.4155	11.0622
262	18	22.8283	0.367719	1.77759	101	0.75	0	10.668	9.47232	11.7532	10.7083	9.81066	8.76793	12.1722	9.28354	9.04757
262	19	22.2075	0.235949	1.05079	101	0.75	0	2.70229	3.07169	3.36892	4.02896	2.93705	3.14546	4.79851	3.63791	1.87918
262	20	21.4775	0.142878	1.06187	101	0.75	0	0.43798	1.08252	1.0569	1.12956	0.998004	0.501576	1.92359	0.090951	0.695965
262	21	21.1583	0.11539	1.06943	101	0.75	0	0.0170019	0.216928	0.297149	-0.174507	0.0774245	-0.365092	0.525996	-0.500409	-0.479283
262	22	20.8325	0.102686	1.07651	101	0.75	0	0.397288	0.368885	0.241558	0.560416	0.166731	0.770687	0.294613	-0.262665	-0.0709088
262	23	20.5325	0.09353	1.08199	101	0.75	0	0.0349021	-0.027096	1.20656	0.310675	0.122888	0.442286	-0.192699	-0.309966	-0.699818
263	0	20.4975	0.0872147	1.08253	101	0.75	0	0.641649	0.80627	2.16017	-0.325766	-0.41721	-0.392025	0.447163	-0.388402	-0.446739
263	1	20.8133	0.128327	1.08016	101	0.75	0	6.78186	5.72285	6.90538	4.12126	4.80813	4.87245	7.92392	7.70684	6.0269
263	2	21.0975	0.193649	1.07688	101	0.75	0	5.17167	5.17084	6.85549	7.04993	9.10015	8.73392	5.67678	5.59501	3.81893
263	3	21.5692	0.258935	1.06946	101	0.75	0	12.1824	12.3377	13.1199	12.0407	12.2731	10.8232	10.6342	10.8194	10.9981
263	4	22.0433	0.395483	1.05971	101	0.75	0	15.1071	13.8883	14.3788	14.5662	13.4625	14.4384	14.8498	12.9369	13.2414
263	5	21.69	0.3862	1.06312	101	0.75	0	12.1272	9.07407	11.1802	11.0428	10.3213	11.0275	11.1549	7.78185	9.33357
263	6	21.0125	0.165035	4.3188	101	0.75	0	6.77536	5.89494	6.73975	6.59229	5.40556	8.32158	7.88346	6.46436	6.56904
263	7	22.9292	0.472168	169.858	101	0.75	0	16.898	15.0462	17.1122	16.8563	16.8477	19.2057	16.6828	18.0958	17.8196
263	8	25.7133	0.94333	580.55	101	0.75	0	18.2864	30.412	39.164	18.5786	27.3915	62.5676	32.8419	81.5719	114.34
263	9	27.2917	1.36488	699.165	101	0.75	0	19.7583	34.0067	45.1234	21.086	28.0943	60.7483	35.983	87.1719	116.819
263	10	28.1167	1.4674	1008.21	101	0.75	0	20.2048	34.8235	47.8396	20.1316	28.9361	62.3135	37.2791	93.3852	117.641
263	11	30.6283	2.0041	1584.43	101	0.75	0	20.2332	34.7017	49.3551	20.1984	28.8308	67.2462	37.8738	87.5607	117.21
263	12	31.3792	2.16083	1813.24	101	0.75	0	18.6611	33.5094	47.6412	19.5471	26.7376	64.5813	36.8215	88.8003	114.194
263	13	31.9975	2.26195	1969.19	101	0.75	0	18.6805	33.5154	46.2027	19.3096	27.8269	61.5062	36.7374	89.3029	114.709
263	14	30.8267	1.96982	1420.72	101	0.75	0	17.9584	32.9379	44.5657	18.799	26.502	60.8452	35.5995	89.7036	113.042
263	15	28.1667	1.38334	633.704	101	0.75	0	17.9931	33.4372	47.2427	18.7907	27.5761	65.4376	37.9282	88.0664	116.542
263	16	26.5392	1.13791	191.618	101	0.75	0	17.3457	24.6033	32.7205	18.1972	22.0575	44.4132	32.0584	66.2208	62.2357
263	17	25.3717	0.919709	18.6502	101	0.75	0	16.6727	16.0408	17.6445	16.7819	17.2648	16.9374	19.6438	16.0387	15.8542
263	18	24.7633	0.845057	1.26155	101	0.75	0	16.2317	14.4167	16.5711	16.3145	15.5459	15.9871	17.3701	14.3831	14.5276
263	19	24.34	0.764316	1.02031	101	0.75	0	13.9832	14.04	16.6153	16.0905	14.8068	15.9318	16.3404	13.8631	13.6279
263	20	23.9825	0.670564	1.02829	101	0.75	0	15.0133	14.6262	17.3009	16.5322	14.9084	15.1882	14.8229	13.6025	13.8967
263	21	23.1017	0.529782	1.04407	101	0.75	0	11.7319	10.9995	12.6028	11.9478	11.3655	11.449	11.4447	10.838	11.1413
263	22	22.7433	0.463181	1.05329	101	0.75	0	13.8955	13.0654	14.9148	15.0313	13.2001	12.5432	11.8659	12.0726	13.0489
263	23	23.28	0.551551	1.04352	101	0.75	0	15.7659	14.6672	16.2176	16.4592	15.3516	14.6162	14.0967	13.9371	14.1282
264	0	22.4067	0.415473	1.05672	101	0.75	0	9.26366	9.45804	10.0441	10.7736	8.76951	8.96104	9.61264	8.98641	8.14471
264	1	20.4267	0.165883	1.08786	101	0.75	0	2.93716	2.07593	2.86718	3.52693	3.24896	2.74553	3.30199	2.88334	2.33377
264	2	21.0367	0.185044	1.07871	101	0.75	0	4.82057	5.65906	6.96667	6.77138	6.21629	6.4271	6.73316	5.07897	4.49305
264	3	21.85	0.355707	1.06817	101	0.75	0	8.29762	7.4525	10.2594	9.93632	9.33764	10.7743	9.97831	8.8594	7.18886
264	4	20.9383	0.218171	1.07962	101	0.75	0	9.78802	8.69186	11.2486	9.61321	8.71791	8.80767	7.92901	6.62514	8.75883
264	5	21.9283	0.374438	1.06945	101	0.75	0	14.3125	13.204	14.0011	12.8574	13.0288	12.1605	10.1117	11.8868	12.1949
264	6	20.8342	0.215761	11.3229	101	0.75	0	5.03027	4.61705	3.85784	3.88107	4.77132	3.90041	3.47746	4.60742	4.56431
264	7	22.8808	0.448228	209.603	101	0.75	0	8.48215	8.51232	8.20251	9.39808	11.2224	13.1255	9.08508	10.7052	11.1848
264	8	26.4633	1.08785	605.203	101	0.75	0	16.9055	29.3171	37.2311	16.8031	25.9579	61.2051	31.6849	78.1201	108.1
264	9	28.5267	1.46237	1445.63	101	0.75	0	18.2564	32.5254	43.4488	17.8207	25.7796	61.7578	33.9884	83.1498	114.178
264	10	30.965	1.98746	1527.55	101	0.75	0	19.6	33.4217	47.6324	19.6252	27.5961	64.9121	37.3394	93.1157	116.793
264	11	32.4875	2.31977	2039.45	101	0.75	0	18.2792	32.3279	47.8305	18.9286	27.7166	65.3827	37.4478	85.7128	115.548
264	12	31.9333	2.13965	2116.08	101	0.75	0	17.1723	33.2218	45.9091	17.8292	27.0259	63.7151	37.2466	82.4168	112.45
264	13	31.9158	2.0765	2008.03	101	0.75	0	19.7863	34.0195	45.986	18.9757	27.6043	62.633	36.0244	80.4099	115.301
264	14	30.9133	1.92898	1527.91	101	0.75	0	18.7425	33.4899	47.8875	19.0869	26.3651	65.6458	36.2602	87.9298	115.892
264	15	30.0508	1.72766	1269.62	101	0.75	0	17.7701	33.6293	47.3972	18.7589	26.5317	61.5585	37.6351	86.5685	112.208
264	16	27.5492	1.21035	312.373	101	0.75	0	16.7987	22.9771	29.8888	17.9574	21.5995	45.8082	29.6185	64.4044	62.765
264	17	25.9808	0.919042	37.7767	101	0.75	0	15.4992	15.0273	17.1356	16.0666	15.6521	15.9885	18.348	14.629	15.7817
264	18	25.0625	0.723543	1.34298	101	0.75	0	14.6006	14.5135	16.4813	16.014	15.2453	15.5394	17.0092	14.3296	14.6948
264	19	24.7842	0.692957	1.00882	101	0.75	0	13.8056	13.0847	15.4408	14.6693	13.9292	14.5278	14.7184	12.9449	13.5611
264	20	24.51	0.662938	1.01378	101	0.75	0	13.2624	12.094	13.5535	12.5945	11.5244	11.56	11.4216	10.9471	12.2781
264	21	23.3142	0.470993	1.03235	101	0.75	0	7.77711	6.84508	9.75194	8.60578	7.55186	6.52218	7.6768	6.26289	7.28091
264	22	21.775	0.21931	1.05702	101	0.75	0	3.36954	3.05404	3.19787	2.99694	2.52833	3.13254	3.05423	2.3487	2.60895
264	23	21.4617	0.183795	1.06258	101	0.75	0	2.22373	1.83901	2.93702	2.49183	2.20053	2.16165	2.53315	2.07401	1.6412
265	0	21.3467	0.172735	1.06529	101	0.75	0	1.96292	1.7247	2.5094	2.54286	2.17786	3.5071	2.63156	2.23778	2.12225
265	1	20.4592	0.134486	1.08016	101	0.75	0	1.38095	1.07514	1.91642	1.76957	1.4399	1.0159	1.43747	0.902988	0.940717
265	2	19.8758	0.113113	1.09062	101	0.75	0	0.758984	0.767926	1.02269	0.886679	0.992377	0.564962	0.885246	0.230117	0.277028
265	3	19.5575	0.100989	1.09561	101	0.75	0	0.674314	0.356251	0.52379	0.484208	0.33451	0.0352172	0.349934	-0.161123	0.235211
265	4	19.375	0.0944048	1.09951	101	0.75	0	0.444012	0.812789	0.499558	1.30027	1.0475	0.993487	1.21711	0.201346	0.307292
265	5	19.2242	0.0907928	1.10364	101	0.75	0	1.00489	1.74279	1.28781	0.588594	1.11034	1.37122	1.02942	1.05108	1.13898
265	6	19.4783	0.105756	22.6113	101	0.75	0	1.03568	1.2274	0.739028	0.715974	1.18484	0.728382	0.679521	0.16316	0.271596
265	7	24.195	0.653968	311.243	101	0.75	0	7.6067	7.48941	9.1889	7.31508	10.0191	12.6653	9.78333	11.3754	9.79467
265	8	28.3383	1.47803	705.713	101	0.75	0	16.6631	28.3375	37.5162	16.9991	25.6862	63.7348	33.431	84.0898	112.005
265	9	29.3342	1.70645	1345.95	101	0.75	0	18.5955	32.5469	44.9697	19.0134	27.098	65.2736	35.5009	88.4481	115.697
265	10	31.565	2.13706	1848.05	101	0.75	0	18.88	33.8819	45.9518	19.0506	27.9777	65.7967	37.149	90.4858	117.115
265	11	32.0758	2.22047	2077.7	101	0.75	0	17.6208	24.4934	31.5038	17.9572	22.0264	44.6158	31.0761	62.8034	84.1415
265	12	32.1858	2.32473	2117.5	101	0.75	0	16.9961	16.8085	17.8041	16.9517	17.2464	17.8882	18.8754	16.9857	17.0908
265	13	32.4333	2.36426	2126.47	101	0.75	0	17.5296	20.5311	23.1722	17.0968	18.3538	21.6399	19.0812	19.4937	18.7484
265	14	32.7042	2.42114	2115.76	101	0.75	0	18.0783	32.0329	47.4385	18.9733	26.1618	61.5193	34.2966	83.7664	103.648
265	15	31.6708	2.17264	1559.09	101	0.75	0	18.1037	32.4484	47.0209	18.3235	26.2441	60.3772	36.2308	85.4936	113.331
265	16	28.9958	1.55832	645.711	101	0.75	0	17.2486	23.9582	32.1381	17.7862	21.7016	45.6171	31.1326	64	62.5489
265	17	26.5575	1.02932	63.6511	101	0.75	0	15.4744	15.0616	16.8092	16.1069	15.5278	15.875	18.1068	15.3426	15.5723
265	18	25.1183	0.717401	1.78142	101	0.75	0	13.4065	13.218	14.5385	14.0846	12.9071	14.5659	15.0208	13.4498	13.4355
265	19	23.4008	0.452479	1.0292	101	0.75	0	6.89303	7.15412	7.87324	9.19206	7.10209	6.82052	7.38327	6.42014	6.09171
265	20	21.6892	0.213239	1.0556	101	0.75	0	2.60626	2.17628	3.17649	2.87599	1.64495	2.42717	3.44999	2.42181	1.86085
265	21	21.12	0.166719	1.06582	101	0.75	0	1.26817	1.23701	2.42672	1.52476	1.25875	1.52914	1.50707	1.08871	1.07783
265	22	20.5658	0.139377	1.07596	101	0.75	0	0.706018	1.17671	1.12817	1.9092	1.18719	1.02643	1.12574	0.481928	0.59149
265	23	20.2017	0.11963	1.08235	101	0.75	0	0.71028	0.339739	2.09317	1.10973	0.518568	0.305926	0.843143	1.4164	0.38689
266	0	20.52	0.111322	1.07687	101	0.75	0	0.872717	1.06387	0.838807	1.25675	0.377662	0.423336	0.835506	0.460847	0.740138
266	1	21.085	0.121769	1.066	101	0.75	0	1.10984	1.96005	1.98912	2.46593	1.84205	2.10787	1.67446	1.16172	1.21408
266	2	20.6942	0.132748	1.07216	101	0.75	0	2.09846	1.94206	1.72456	2.23263	1.49598	2.03958	1.37082	1.7301	2.19029
266	3	19.9267	0.118022	1.08511	101	0.75	0	0.576185	1.63629	1.75364	1.42241	0.904961	1.19768	0.998769	0.978018	0.649989
266	4	20.4392	0.10696	1.07689	101	0.75	0	1.73277	1.53035	0.72734	0.735055	0.943043	0.479542	0.618408	0.269421	0.42874
266	5	20.9558	0.124109	1.06781	101	0.75	0	0.279387	0.703933	-0.165542	-0.115055	-0.181296	0.0500355	0.308249	-0.644166	-0.189993
266	6	21.3033	0.131133	9.83561	101	0.75	0	0.48389	0.41484	0.0602445	-0.0415753	-0.113596	0.0299777	-0.347863	-0.205738	-0.249752
266	7	23.2475	0.325019	179.558	101	0.75	0	3.75073	2.75407	3.64374	2.42334	3.83037	7.23666	3.77984	6.1954	5.16175
266	8	28.3983	1.32702	750.966	101	0.75	0	10.4413	23.3562	30.047	11.3585	19.65	55.139	27.7946	78.0565	104.812
266	9	29.2175	1.45911	932.436	101	0.75	0	12.1609	26.4636	36.0406	12.975	19.8651	56.0822	28.7843	82.0879	112.155
266	10	29.58	1.51868	921.623	101	0.75	0	14.0455	28.4152	38.6406	14.9836	22.6329	56.5125	32.3888	83.7392	111.272
266	11	32.145	2.1277	1547	101	0.75	0	14.3614	30.3052	43.1648	15.0051	23.1913	59.2197	34.0563	88.0379	113.742
266	12	33.7608	2.51946	2135.92	101	0.75	0	14.848	29.9736	42.0821	14.919	22.8411	62.8455	36.25	85.1695	107.866
266	13	33.7458	2.47379	2160.55	101	0.75	0	14.4707	28.8358	43.4796	15.0219	23.2923	56.8699	34.7119	83.8537	109.308
266	14	34.25	2.60278	2122.02	101	0.75	0	14.7961	29.1187	42.6038	15.0552	23.5748	58.8115	33.9774	83.3228	108.931
266	15	32.4133	2.0972	1418.13	101	0.75	0	12.996	27.4177	40.9959	13.1926	21.8222	57.9193	32.8265	79.8504	103.456
266	16	28.3542	1.141	297.271	101	0.75	0	12.3908	20.161	27.3758	14.1364	18.1686	41.216	27.4845	60.4721	61.6313
266	17	26.9275	0.845706	50.5153	101	0.75	0	12.0296	11.3187	12.5757	12.7247	12.1811	12.0591	15.3343	10.7238	11.5679
266	18	25.7033	0.628027	1.48451	101	0.75	0	9.33429	8.5699	10.1126	10.0992	9.11176	9.51648	11.9668	8.50233	8.69554
266	19	24.7475	0.447036	1.00526	101	0.75	0	5.0647	4.22344	5.5327	5.55374	4.56773	4.44168	6.21994	4.09198	4.04545
266	20	23.825	0.283799	1.0186	101	0.75	0	2.06732	1.62044	1.95776	1.85475	1.13394	1.86482	2.39958	1.97809	1.28025
266	21	22.9225	0.214683	1.03474	101	0.75	0	0.475671	0.732043	0.6421	0.0745887	0.324397	0.696475	0.948744	0.00977725	0.247754
266	22	22.4583	0.178938	1.04159	101	0.75	0	-0.421066	-0.0245528	-0.153283	0.0739885	-0.233661	0.0633804	0.0238289	-0.0248829	-0.0333529
266	23	22.1817	0.157914	1.04617	101	0.75	0	0.000301978	0.247004	0.446817	0.392239	-0.283401	-0.37465	-0.392003	-0.216414	-0.268547
267	0	22.0125	0.147972	1.04955	101	0.75	0	-0.277834	-0.348197	-0.491107	-0.469995	-0.675931	-0.0210193	-0.445343	-0.621232	-0.585874
267	1	21.4767	0.119911	1.05882	101	0.75	0	-0.575071	-0.654324	-0.0805867	-0.745596	-0.782432	-0.874529	-0.866516	-0.873156	-0.523846
267	2	22.1108	0.127855	1.04919	101	0.75	0	-0.773159	-0.773062	-0.43409	-0.679044	-0.881836	-0.407592	-0.752483	-0.921507	-0.861325
267	3	21.9067	0.125787	1.05167	101	0.75	0	-0.51828	0.0526148	0.0248942	-0.596047	-1.09097	-0.695234	-1.21319	-0.857851	-0.75784
267	4	21.8542	0.127997	1.05239	101	0.75	0	-0.549804	-0.481174	-0.207449	-0.593174	-1.18315	-0.314332	-0.711326	-1.03055	-0.782852
267	5	21.2758	0.118115	1.06593	101	0.75	0	-0.77778	-0.733427	-0.593737	-0.940916	-0.602859	-0.71801	-0.771509	-1.27539	-1.16282
267	6	20.8908	0.127903	24.5866	101	0.75	0	-0.508992	-0.550074	-0.201747	-0.540561	-0.673965	-0.222791	-0.972552	-1.2079	-0.682488
267	7	24.25	0.456826	198.864	101	0.75	0	2.88685	2.96383	2.77167	2.44696	3.52543	7.21011	3.99193	5.70177	5.09405
267	8	27.3633	1.08573	649.322	101	0.75	0	9.7759	24.9409	34.5257	11.0949	20.4292	57.6774	28.3606	81.3099	107.17
267	9	29.395	1.51815	1000.91	101	0.75	0	13.1354	28.2289	41.2422	13.5234	22.5349	61.1328	32.8507	88.8494	113.611
267	10	30.6683	1.76045	1511.35	101	0.75	0	14.2022	30.052	45.2762	14.1197	23.7284	60.7037	34.944	88.7769	110.24
267	11	32.4975	2.12932	2051.8	101	0.75	0	13.7737	28.9986	41.7369	13.8594	22.3738	60.643	34.7951	85.9436	109.591
267	12	32.1208	2.1012	1917.96	101	0.75	0	13.9227	29.0848	42.9228	13.8113	22.5144	63.1262	35.23	81.6874	107.795
267	13	33.5083	2.48821	2109.38	101	0.75	0	13.2135	29.7769	44.2028	14.0295	23.1162	63.922	35.6473	85.4736	111.383
267	14	32.4333	2.24813	1608.14	101	0.75	0	13.7611	29.8468	43.9391	14.3892	23.2747	62.3318	35.1482	83.1426	113.08
267	15	28.9658	1.46806	377.669	101	0.75	0	12.8442	30.784	45.8349	14.4262	23.4278	62.5722	35.0343	85.9126	112.31
267	16	26.6817	1.00483	184.4	101	0.75	0	12.5006	20.2644	28.7955	13.3463	17.6271	39.6087	27.678	61.1198	61.834
267	17	26.21	0.864558	55.9887	101	0.75	0	11.7208	11.922	12.5044	12.6349	11.9997	12.2884	16.0332	11.3687	11.6845
267	18	25.2092	0.692352	1.52773	101	0.75	0	10.0311	10.2062	11.5508	10.8339	10.1403	10.8952	13.5386	10.3011	10.2335
267	19	24.815	0.658014	1.00371	101	0.75	0	9.97558	9.34318	9.91301	10.1215	9.35297	9.60108	10.708	9.29738	9.71519
267	20	24.0158	0.451496	1.01465	101	0.75	0	5.00432	4.32027	4.95541	5.57905	4.42945	4.1574	4.76247	3.52275	3.79772
267	21	22.9433	0.27347	1.03002	101	0.75	0	2.21639	1.81036	2.30556	1.48171	2.10915	1.91965	2.41922	2.04242	1.76378
267	22	22.7108	0.24527	1.03562	101	0.75	0	1.08417	1.30968	1.59998	0.373716	0.519439	0.528696	1.25812	0.865102	0.653773
267	23	21.6967	0.178228	1.05168	101	0.75	0	0.828754	1.14535	0.942863	1.57224	0.488305	0.708562	1.09783	0.869379	0.117876
268	0	22.275	0.25202	1.04742	101	0.75	0	4.97196	5.17483	7.03224	7.27683	3.69396	2.36024	3.29974	5.75938	3.68613
268	1	22.1967	0.294735	1.04974	101	0.75	0	5.33939	4.97854	5.06232	5.81923	4.57716	4.89473	3.84753	4.05766	3.54809
268	2	20.6783	0.150132	1.07179	101	0.75	0	1.09876	1.13985	1.81807	1.84363	1.4418	1.16481	2.09855	0.996241	0.675379
268	3	19.9708	0.115787	1.0829	101	0.75	0	0.399059	0.197362	0.761835	0.885051	0.0486011	0.19902	0.20019	0.52349	0.275167
268	4	19.6117	0.103946	1.0897	101	0.75	0	0.993967	0.434656	0.362718	0.808498	0.30123	0.506265	0.21458	-0.304002	0.131605
268	5	19.2942	0.0948494	1.09965	101	0.75	0	0.533663	0.365321	0.449668	0.541353	-0.284211	0.24939	0.447448	0.0833363	0.1464
268	6	19.6358	0.116053	26.7999	101	0.75	0	0.0194326	0.177639	0.691989	0.405435	0.723888	0.611281	0.69574	0.209111	-0.44977
268	7	24.755	0.689483	337.73	101	0.75	0	4.922	4.82694	5.15925	3.8825	5.7549	9.82553	5.74784	7.53279	6.00107
268	8	28.6342	1.54082	678.082	101	0.75	0	13.9624	27.5605	36.1692	14.7241	23.5096	60.5328	31.8341	85.4619	105.35
268	9	29.3742	1.72299	1110.09	101	0.75	0	16.1161	31.7263	44.8628	17.4062	24.3365	61.4374	33.4426	88.9216	108.671
268	10	31.1317	2.0885	1577.91	101	0.75	0	16.6451	32.3552	46.0316	17.7734	26.454	64.6485	36.2232	89.7349	112.886
268	11	32.2242	2.20838	2067.65	101	0.75	0	17.1407	31.7726	47.3815	17.6649	25.1256	62.0818	35.9739	88.9859	111.115
268	12	31.9825	2.13839	1997.69	101	0.75	0	16.9469	31.1199	45.3403	17.4986	25.1667	64.6019	37.4744	81.4535	107.382
268	13	32.8708	2.3961	2078.97	101	0.75	0	16.5755	32.2325	46.0929	17.6703	26.9956	64.2013	38.9634	79.5048	105.981
268	14	32.7483	2.36098	1774.22	101	0.75	0	15.1482	29.9486	44.1529	16.0402	25.4544	64.8878	36.8223	81.0547	103.354
268	15	29.6667	1.63033	930.885	101	0.75	0	14.9954	25.1553	29.6436	15.0817	20.5599	43.8301	29.9813	57.8981	72.795
268	16	28.0242	1.30169	284.879	101	0.75	0	13.7809	14.5927	14.8877	13.8993	15.3596	14.586	18.4448	13.398	13.6347
268	17	26.2233	0.957526	45.5521	101	0.75	0	12.6308	13.0808	13.3525	13.1759	12.7273	13.8576	15.3013	11.5372	12.0954
268	18	25.0442	0.729553	1.43646	101	0.75	0	11.3143	10.7605	12.1694	11.4214	10.7977	11.3945	11.0901	9.78596	10.0251
268	19	24.61	0.644617	1.00524	101	0.75	0	8.32269	9.86184	9.87737	9.39993	9.8713	9.7389	9.30742	8.50421	8.12218
268	20	23.2708	0.401453	1.02467	101	0.75	0	4.50217	4.30181	4.66605	4.3502	4.14144	5.19582	4.35987	3.99708	4.36662
268	21	22.0008	0.242689	1.04582	101	0.75	0	2.59783	2.59822	3.04535	2.77413	2.66981	3.01882	2.94575	2.06433	2.17693
268	22	21.8558	0.2117	1.04865	101	0.75	0	2.17924	2.27179	2.51225	2.05298	2.51187	1.70461	2.18443	1.80944	2.95806
268	23	21.905	0.211214	1.04884	101	0.75	0	1.83895	1.55814	1.71971	1.67733	1.61807	1.87338	1.4563	1.5702	1.34052
269	0	20.8975	0.166205	1.06691	101	0.75	0	1.87429	1.78269	1.34169	2.28998	1.56876	2.12595	1.62721	1.32731	1.76064
269	1	20.6767	0.13784	1.07034	101	0.75	0	1.25781	1.22852	1.5022	1.27422	0.86436	1.02975	1.35592	0.919051	0.67354
269	2	20.6967	0.14053	1.07016	101	0.75	0	0.160696	0.690033	0.83168	1.05246	0.835281	0.959247	0.428776	0.494892	0.312498
269	3	20.1283	0.120578	1.07961	101	0.75	0	0.276722	0.734163	0.540895	0.315271	0.0386382	0.712458	0.151207	0.572809	0.0797622
269	4	19.8025	0.111412	1.08455	101	0.75	0	-0.0258027	0.529669	0.616157	0.33595	0.65937	0.453191	0.485079	-0.244765	0.185165
269	5	19.4383	0.100072	1.0986	101	0.75	0	0.151675	0.233752	1.08312	0.180754	-0.119358	0.517992	-0.054305	-0.390022	0.189234
269	6	19.7725	0.124079	26.0641	101	0.75	0	0.0292935	0.110695	0.621289	-0.18018	0.493181	0.356746	-0.155945	-0.128721	-0.780241
269	7	22.8617	0.373596	203.581	101	0.75	0	2.61199	2.94321	3.36322	2.75967	4.609	7.88549	3.64583	5.28141	3.94191
269	8	28.7483	1.46429	688.404	101	0.75	0	14.3197	26.5287	38.5123	15.0058	24.8708	64.644	31.7251	86.7943	106.026
269	9	29.7408	1.78364	1400.94	101	0.75	0	18.2406	32.5336	49.8324	20.0153	27.6244	69.7109	36.7705	93.5244	113.198
269	10	31.9667	2.32527	1985.19	101	0.75	0	19.484	34.8654	50.3438	20.5044	28.5771	68.6733	39.1121	87.2992	111.693
269	11	32.1858	2.40904	2080.3	101	0.75	0	19.7125	33.5065	51.536	20.518	27.9452	66.4615	38.4475	85.4304	110.935
269	12	32.3833	2.42452	2113.21	101	0.75	0	18.4265	22.5408	28.8497	19.1752	20.5889	47.0101	30.4147	46.561	52.1892
269	13	31.6717	2.22948	1694.64	101	0.75	0	18.6754	33.3016	47.855	19.279	27.2684	64.3691	39.1951	90.7059	112.585
269	14	31.3158	2.17849	1360.31	101	0.75	0	18.1304	33.3019	48.2544	19.1122	27.3653	70.0845	38.5271	92.5982	115.246
269	15	32.5808	2.47174	1708.95	101	0.75	0	17.6422	32.2404	48.2781	19.0085	27.2174	67.4097	38.9635	91.28	114.072
269	16	29.5058	1.68866	501.996	101	0.75	0	17.295	23.7814	31.5694	19.0183	22.0759	47.0406	32.8481	69.6857	65.3743
269	17	26.485	1.04122	31.6776	101	0.75	0	15.0006	17.135	17.09	16.7496	15.7855	15.4925	18.2006	15.3821	14.242
269	18	23.8517	0.509005	1.8118	101	0.75	0	6.74777	6.85386	8.07422	7.73492	7.18497	7.52682	9.24648	5.80999	6.34837
269	19	22.9392	0.332079	1.02863	101	0.75	0	4.00881	3.90993	4.31397	5.02639	4.11889	4.14949	5.57737	3.67392	4.08808
269	20	22.5625	0.264788	1.03597	101	0.75	0	3.30718	2.306	4.61474	3.6519	2.48489	2.31674	3.65585	2.85742	3.87256
269	21	22.07	0.209922	1.0437	101	0.75	0	1.38125	1.76615	2.57069	2.39482	1.99023	1.62458	2.41457	1.41768	0.948684
269	22	21.805	0.173362	1.04936	101	0.75	0	1.29377	1.31241	0.860188	0.689018	0.765091	1.32711	1.41239	0.724399	0.693024
269	23	21.2825	0.153147	1.05846	101	0.75	0	0.742629	0.385014	1.07543	1.05519	0.945023	0.483308	0.958452	0.108093	0.363108
270	0	20.82	0.133401	1.06708	101	0.75	0	0.50823	-0.0572548	0.168861	0.517571	0.332559	-0.0502178	0.275707	0.104868	-0.350816
270	1	20.3283	0.117198	1.07505	101	0.75	0	0.381758	0.37896	-0.250211	0.593755	0.501238	0.0846341	0.538299	0.388938	-0.182481
270	2	20.1317	0.108226	1.0787	101	0.75	0	0.0230486	0.625115	0.127524	0.0487736	-0.112411	0.0303858	-0.0159928	-0.688602	-0.167792
270	3	19.8583	0.10323	1.08363	101	0.75	0	-0.363149	-0.602147	-0.974323	-0.58943	-0.897485	-0.525759	-0.331955	-1.29714	-0.917456
270	4	19.5417	0.0975048	1.08841	101	0.75	0	-0.770953	-0.558949	-0.797571	-0.881618	-0.824564	-0.857851	-0.79358	-1.11356	-1.01808
270	5	19.315	0.0926416	1.10055	101	0.75	0	-0.817662	-0.574906	-0.790444	-1.17859	-0.920832	-1.06763	-1.043	-1.17287	-1.00924
270	6	20.0133	0.118431	29.5144	101	0.75	0	-0.411253	-0.597495	-0.808975	-0.511153	-0.722729	-1.23796	-1.2011	-1.25982	-1.3427
270	7	24.8242	0.6635	333.761	101	0.75	0	2.21144	2.41689	2.431	1.85854	3.41869	2.37633	3.18861	6.13521	4.79816
270	8	28.8475	1.44095	801.28	101	0.75	0	13.4466	29.2451	39.2837	15.0548	24.0677	15.719	35.9511	104.873	122.109
270	9	29.3767	1.62353	1073.12	101	0.75	0	16.7562	34.2799	49.2445	18.7776	28.7339	18.2987	39.4565	108.149	135.68
270	10	31.0658	1.98972	1337.82	101	0.75	0	18.0719	34.9895	54.711	19.479	29.6323	22.2669	40.8002	105.045	133.871
270	11	33.2333	2.41263	2059.07	101	0.75	0	17.8158	32.6817	48.5247	18.8697	26.8142	66.5992	39.1293	91.0545	113.031
270	12	32.9817	2.35079	2137.31	101	0.75	0	17.3154	31.0451	49.9302	17.8466	27.0121	63.6344	38.6384	86.2305	106.639
270	13	32.7467	2.27855	1971.81	101	0.75	0	18.5615	33.546	48.3009	18.9579	27.45	66.8848	40.9241	92.9725	105.53
270	14	32.87	2.27892	2007.47	101	0.75	0	18.3569	31.997	44.4623	19.1234	25.7264	65.2633	39.2804	86.375	104.632
270	15	32.8908	2.32514	1871.4	101	0.75	0	16.5597	30.6869	44.5193	17.6152	24.3505	60.6453	36.5365	82.4992	101.516
270	16	29.5092	1.59345	527.714	101	0.75	0	15.5425	21.673	30.315	16.6217	19.885	42.0108	29.0788	59.3493	64.0315
270	17	26.2808	0.953353	29.4665	101	0.75	0	14.5758	14.111	14.4416	14.2914	13.9484	14.3605	17.1572	14.0008	14.282
270	18	24.9458	0.655309	1.67185	101	0.75	0	9.70065	9.83667	10.3478	10.5076	9.11586	10.1389	11.7728	8.32761	8.78378
270	19	23.1592	0.370816	1.02778	101	0.75	0	5.6835	5.47763	6.45067	5.24144	4.6838	4.8745	5.8939	4.32054	4.17326
270	20	22.1133	0.237871	1.04512	101	0.75	0	1.67185	3.26977	4.45224	3.37812	1.94366	2.34643	2.93513	1.7271	1.71947
270	21	21.765	0.192648	1.05203	101	0.75	0	1.59185	1.75389	2.07322	1.95785	1.53434	1.81297	1.91447	1.15412	1.53524
270	22	21.6942	0.170644	1.05345	101	0.75	0	1.5238	1.30511	1.24363	2.09949	1.11877	0.965204	1.08008	0.865477	1.35806
270	23	21.1875	0.1502	1.06151	101	0.75	0	0.667622	1.30961	1.08825	1.10532	0.633337	0.658049	0.973712	0.431175	0.128454
271	0	20.5558	0.125079	1.07233	101	0.75	0	0.555269	0.615017	0.549447	0.655251	-0.00250384	0.32805	0.384759	0.0187799	0.0254343
271	1	20.2117	0.109836	1.07943	101	0.75	0	0.52301	0.451957	0.556575	1.05871	0.264394	-0.026871	0.38662	0.136077	-0.103258
271	2	19.9533	0.0995021	1.08363	101	0.75	0	0.178689	0.176979	0.104718	0.431783	0.138687	-0.196713	0.0973053	-0.438291	-0.166442
271	3	19.5842	0.0946332	1.08988	101	0.75	0	-0.38216	0.00570356	-0.910179	-0.23841	-0.317146	-0.508474	-0.236887	-0.197846	-0.679592
271	4	19.2542	0.0888889	1.09469	101	0.75	0	-0.274893	-0.418583	-0.0492275	-0.490672	-0.6917	-0.502442	-0.490506	-0.566241	-0.693186
271	5	18.8167	0.0869005	1.11312	101	0.75	0	-0.705384	-0.404426	-0.374223	-0.995239	-0.876644	-0.755717	-0.742625	-0.745206	-0.913315
271	6	19.2	0.109865	32.9399	101	0.75	0	-0.0241702	0.260883	0.227303	-0.455126	-0.469095	-0.813708	-0.409213	-0.465262	0.00492333
271	7	24.5075	0.662044	335.007	101	0.75	0	3.67725	3.85784	4.5791	4.67343	6.14587	4.89515	4.7202	7.10993	5.57799
271	8	28.6017	1.53999	755.658	101	0.75	0	14.1451	26.6323	35.7002	14.3035	23.5935	46.2036	31.5114	85.9505	110.353
271	9	30.7767	2.09537	1837.95	101	0.75	0	18.0091	31.4423	45.6126	18.7735	25.9136	60.3376	36.6919	92.0198	108.365
271	10	32.9025	2.56255	1982.65	101	0.75	0	19.6329	32.7115	50.2708	20.5158	28.9736	60.6022	37.9714	92.6105	108.109
271	11	33.79	2.82068	2085.23	101	0.75	0	19.9705	34.1053	52.1039	20.9079	29.0174	69.4005	42.2991	92.4435	110.929
271	12	34.0425	3.19215	2129.37	101	0.75	0	22.4013	36.6088	53.7203	22.8829	31.1037	70.1708	44.8613	96.0491	110.404
271	13	34.2258	3.27747	2149.26	101	0.75	0	23.1378	35.8211	52.6313	22.9548	30.8407	71.2321	43.3007	95.6625	113.185
271	14	34.4308	3.26965	2134.45	101	0.75	0	21.2613	34.6189	50.6999	21.9188	29.2955	70.2435	39.9584	92.5339	110.774
271	15	33.5175	2.74186	1659.74	101	0.75	0	18.9052	32.8711	48.0614	19.4508	26.7875	64.5202	39.4179	88.0131	105.935
271	16	28.53	1.43644	153.633	101	0.75	0	17.6961	24.5228	33.8001	18.6787	22.4961	46.3763	32.8113	68.6369	70.357
271	17	26.6133	1.0824	29.703	101	0.75	0	16.221	15.121	16.564	16.7407	15.7906	16.1429	18.9163	15.5259	15.5955
271	18	23.8117	0.569216	1.93598	101	0.75	0	7.70355	7.91363	8.04999	7.76853	7.5431	8.56132	10.1288	7.52334	7.56062
271	19	21.8733	0.299133	1.04672	101	0.75	0	5.42755	5.97513	6.29815	6.24848	5.92249	5.81365	6.76766	5.5946	5.68114
271	20	21.8083	0.319404	1.05364	101	0.75	0	5.89155	7.38489	8.8411	8.36058	5.79449	5.50031	6.8195	5.62742	7.06953
271	21	20.6758	0.193729	1.06727	101	0.75	0	3.19037	3.59361	3.46728	3.85709	3.00574	2.84165	2.88481	3.32042	3.33662
271	22	20.1567	0.151001	1.07615	101	0.75	0	2.29047	2.16471	2.27278	2.68809	1.78941	1.88545	2.00604	2.28553	2.54551
271	23	19.9558	0.126216	1.08016	101	0.75	0	1.80559	1.69159	1.87508	1.22991	1.08943	1.10134	1.38291	1.36231	0.742104
272	0	20.0075	0.114522	1.07979	101	0.75	0	0.670317	1.08229	1.77245	0.788215	1.30144	0.606146	1.25138	1.02141	0.661098
272	1	19.9192	0.110003	1.08107	101	0.75	0	1.10196	1.31457	1.92127	1.60432	1.04153	0.817249	1.26607	1.19102	0.941908
272	2	19.6783	0.106765	1.08437	101	0.75	0	1.23426	1.76456	1.50733	1.58307	1.13165	1.43201	1.64435	1.0174	1.6785
272	3	19.2917	0.0945989	1.09117	101	0.75	0	1.52008	1.39365	1.4868	1.3223	1.27659	1.25341	1.2613	1.03753	0.921328
272	4	19.195	0.0856628	1.09357	101	0.75	0	1.35237	2.55575	2.1864	1.90394	1.32295	1.57364	1.60148	1.22555	0.76985
272	5	19.0475	0.0846264	1.10573	101	0.75	0	0.941692	1.78044	1.40641	2.05356	0.991117	1.02142	1.62703	1.4494	0.853682
272	6	19.7617	0.118318	23.7421	101	0.75	0	2.10737	2.05321	2.33692	1.53855	2.32351	1.6115	2.24527	1.99059	1.49067
272	7	24.4667	0.685878	310.191	101	0.75	0	10.8059	9.62816	11.2281	11.8227	11.9935	15.5988	12.4655	11.9571	11.2944
272	8	28.5617	1.47703	754.691	101	0.75	0	18.311	28.8512	40.0842	18.5062	25.7992	62.3864	33.4851	81.1335	98.0946
272	9	29.9475	1.76239	1338.41	101	0.75	0	19.9224	32.1065	48.2057	20.2477	27.162	59.7737	35.9987	83.9872	107.686
272	10	29.6342	1.7927	861.323	101	0.75	0	21.8536	34.4396	50.1061	22.4953	29.3805	64.8371	40.8909	92.579	105.658
272	11	29.3142	1.75898	754.804	101	0.75	0	21.8673	35.0615	49.6511	21.6966	29.4375	63.7854	39.8506	87.8691	110.34
272	12	30.5375	1.98557	1204.47	101	0.75	0	21.889	35.6334	51.0212	22.5242	29.7249	67.7539	42.6869	92.3662	105.824
272	13	30.4358	1.96736	841.762	101	0.75	0	22.001	34.9228	50.2651	22.8912	29.4672	64.5651	43.2673	91.5964	106.867
272	14	31.1042	2.09336	1279.54	101	0.75	0	20.8645	34.6167	49.7149	22.3021	28.9154	66.2901	41.6399	88.4205	107.537
272	15	32.0417	2.39054	1418.69	101	0.75	0	20.6763	33.8905	49.0093	21.5645	28.731	65.4256	40.0691	88.6509	106.554
272	16	30.8508	2.16123	725.613	101	0.75	0	19.6709	25.8594	34.5171	20.5769	23.4625	47.7767	33.826	67.338	66.7161
272	17	26.9742	1.34167	30.5664	101	0.75	0	16.7934	17.0855	18.6423	17.0022	17.0481	17.4552	20.0069	15.6902	16.8225
272	18	24.9667	0.921886	1.93327	101	0.75	0	16.9447	16.9886	17.1441	16.4442	15.7966	17.3868	18.86	15.769	15.8804
272	19	24.2158	0.776814	1.02032	101	0.75	0	16.2987	16.3794	17.2995	15.9535	16.0587	16.4817	17.2925	14.8891	15.3294
272	20	23.5492	0.669134	1.03055	101	0.75	0	15.2765	15.6886	16.3673	15.6804	14.874	15.8166	15.1224	14.4155	15.1391
272	21	23.5133	0.643073	1.03334	101	0.75	0	16.5284	15.7129	16.9417	16.0546	15.4806	16.0568	15.2673	15.3635	15.897
272	22	22.6392	0.509238	1.04443	101	0.75	0	11.636	12.0952	13.4509	12.5743	12.1737	12.7564	11.8878	11.8183	12.0681
272	23	20.4517	0.207407	1.07144	101	0.75	0	5.56097	6.19632	5.97031	5.76175	6.40904	5.65118	5.17815	4.76909	4.48954
273	0	20.045	0.143093	1.07687	101	0.75	0	4.39276	4.33489	5.21769	3.76503	4.35336	4.15053	4.14331	3.89543	3.72157
273	1	20.6875	0.164916	1.06744	101	0.75	0	4.22258	4.46051	4.91977	5.46226	4.40705	4.96262	5.06578	4.84123	4.68214
273	2	20.3433	0.145022	1.07124	101	0.75	0	3.44496	3.64235	4.23843	3.30347	4.24797	2.99306	3.49422	3.22132	4.32625
273	3	20.6433	0.144981	1.0669	101	0.75	0	3.58083	4.12388	3.56278	3.64209	4.22572	3.05435	3.04627	3.89246	3.17155
273	4	20.2233	0.13374	1.07325	101	0.75	0	3.27676	4.47777	4.94828	4.7295	4.13646	2.86268	3.83596	3.5788	3.62101
273	5	19.6333	0.106109	1.09736	101	0.75	0	3.72793	3.641	3.85784	3.03447	3.3456	2.60994	3.86246	3.48836	3.58811
273	6	19.9042	0.115658	21.2582	101	0.75	0	2.01024	2.11107	3.73668	3.27185	2.6031	2.93692	1.68148	2.15672	1.28555
273	7	24.7442	0.729868	309.42	101	0.75	0	13.8754	14.8523	15.0687	14.568	14.497	13.9532	13.2088	17.0843	13.702
273	8	27.6283	1.32936	586.656	101	0.75	0	21.8176	32.8566	43.3248	22.0399	30.467	53.6374	40.051	99.5116	109.928
273	9	30.7392	2.06483	1657.15	101	0.75	0	25.6997	33.6437	54.3846	26.0917	33.3955	70.8592	43.7107	96.3694	108.473
273	10	30.6725	1.99459	1335.45	101	0.75	0	26.8267	35.948	44.85	27.3297	34.2765	72.9725	46.3643	99.7974	117.479
273	11	31.2275	2.12234	1652	101	0.75	0	27.2731	40.5329	45.8463	27.0937	34.9903	47.573	49.2394	106.015	126.445
273	12	31.5675	2.26567	1721.61	101	0.75	0	26.468	39.2862	56.4087	26.6882	33.8938	65.8071	45.6611	92.5094	108.913
273	13	31.3033	2.23828	1558.04	101	0.75	0	25.5862	36.5891	50.372	26.8243	32.8339	62.8533	44.7291	89.8305	104.352
273	14	29.6883	1.89673	899.155	101	0.75	0	25.0776	32.8324	41.6927	26.552	29.7928	56.5466	40.6895	72.8606	78.3537
273	15	26.9008	1.38415	316.336	101	0.75	0	25.6601	37.6454	54.3062	25.4323	32.5268	66.1395	44.8029	91.2798	108.281
273	16	26.2925	1.26143	158.048	101	0.75	0	23.6452	30.1197	40.8645	25.0895	28.3323	50.2415	38.9116	72.115	69.5602
273	17	25.1208	1.04376	27.238	101	0.75	0	22.603	22.2428	23.3846	23.225	21.8275	23.3139	25.7014	21.579	22.5134
273	18	24.1142	0.919673	1.63243	101	0.75	0	22.0818	22.5784	23.339	23.6921	21.5638	23.3484	24.3387	20.4948	21.501
273	19	23.5367	0.820093	1.02446	101	0.75	0	20.1582	20.4456	21.61	21.3153	20.3879	20.369	20.7213	18.3451	18.2727
273	20	23.6842	0.794299	1.02083	101	0.75	0	20.2777	19.8877	21.7525	20.2298	20.069	22.2768	21.0888	19.2772	20.1578
273	21	23.8892	0.929816	1.01962	101	0.75	0	24.1716	23.6491	24.649	24.1024	23.1504	24.0104	23.0147	21.698	22.8077
273	22	23.2975	0.757923	1.02533	101	0.75	0	19.2802	19.2965	20.6179	19.4037	18.3584	19.2623	18.7387	17.9549	18.0544
273	23	23.3067	0.748334	1.02637	101	0.75	0	21.4609	21.4044	22.23	21.8913	20.5176	20.8942	20.1839	19.6597	20.1439
274	0	23.7017	0.86789	1.02221	101	0.75	0	24.1109	25.0482	25.9803	24.7931	23.4122	25.0252	23.508	22.4683	23.6406
274	1	23.7967	0.923038	1.02135	101	0.75	0	25.316	26.2297	25.5256	25.9006	24.2445	26.2876	24.5083	22.9606	23.9303
274	2	23.7092	0.912091	1.02152	101	0.75	0	25.8632	25.459	26.6545	26.3751	24.8251	26.9859	24.6494	23.2012	24.4246
274	3	23.6358	0.926502	1.0236	101	0.75	0	25.1238	25.3597	25.8264	25.4598	23.9779	25.4757	23.8358	24.0453	25.0331
274	4	23.5108	0.97991	1.02585	101	0.75	0	25.546	24.6913	26.1713	24.6678	24.985	26.0725	23.7847	24.3138	25.0336
274	5	23.5017	1.01596	1.03725	101	0.75	0	23.6957	24.4725	25.212	24.4799	23.7163	24.8127	22.7654	22.8303	23.4237
274	6	23.1875	0.902561	27.1161	101	0.75	0	18.3037	19.6374	18.504	18.7149	17.3212	19.6669	18.0008	16.2297	17.8548
274	7	24.6592	1.11881	162.386	101	0.75	0	20.1391	19.793	20.3998	19.8553	20.3084	23.1124	19.0544	20.3765	21.2993
274	8	26.9592	1.47783	550.886	101	0.75	0	23.2386	33.1423	45.2605	22.6253	30.4844	66.8783	39.0669	89.845	108.204
274	9	26.9317	1.4367	639.62	101	0.75	0	24.69	36.2948	55.857	24.4429	31.6609	65.7858	41.6842	98.3239	115.762
274	10	26.3892	1.29539	611.626	101	0.75	0	24.2418	36.2601	53.3825	25.1122	30.6889	60.9977	41.9419	96.7359	110.325
274	11	29.1475	1.89405	1059.2	101	0.75	0	24.4024	25.4662	28.2624	24.7256	28.5018	26.3342	26.1765	25.9846	28.2735
274	12	30.715	2.2816	1186.01	101	0.75	0	23.2328	27.8028	24.3411	27.1117	28.453	23.8495	24.9035	22.1813	22.353
274	13	28.7983	1.83112	862.108	101	0.75	0	23.3385	25.6093	24.2912	21.7999	24.9891	23.1912	28.8068	24.3372	23.4354
274	14	27.6583	1.5935	576.6	101	0.75	0	21.2215	22.0052	22.4752	20.5022	23.1505	23.136	23.8889	25.1563	23.4899
274	15	27.185	1.47586	510.934	101	0.75	0	22.2277	24.4478	27.6894	20.4134	21.9769	24.8201	22.2108	23.6257	34.3224
274	16	25.9817	1.23185	178.586	101	0.75	0	21.1622	27.2782	35.5548	20.3592	25.4637	48.8911	32.2783	66.6395	65.3959
274	17	25.0983	1.04551	40.027	101	0.75	0	19.7688	19.2103	20.6721	18.6487	19.5438	19.4182	19.3019	18.1155	17.7624
274	18	24.3375	0.928618	1.46175	101	0.75	0	18.8236	17.952	19.0756	18.4391	18.1854	18.5463	19.0229	17.5055	16.864
274	19	24.1758	0.85693	1.01206	101	0.75	0	17.9365	17.7328	19.5802	17.1769	17.7128	19.0042	19.228	17.6524	16.8315
274	20	23.7517	0.73831	1.01963	101	0.75	0	18.5255	17.5801	19.4034	17.0814	17.7373	17.9866	17.8218	16.7511	17.1383
274	21	22.4633	0.515982	1.03741	101	0.75	0	13.7232	14.0022	14.8133	12.0822	13.2718	13.4404	13.4132	12.5446	12.0983
274	22	21.335	0.307657	1.0531	101	0.75	0	7.68816	9.30242	10.5986	8.95541	9.17829	8.81404	7.88476	7.7006	7.75832
274	23	20.0092	0.19595	1.07544	101	0.75	0	7.02599	6.83349	7.72842	6.69753	6.39855	7.20597	6.86006	6.94285	6.6918
275	0	19.0492	0.142412	1.09229	101	0.75	0	5.96021	5.58095	6.8133	5.86325	5.70282	6.09837	6.65336	5.89845	5.65705
275	1	18.4517	0.119841	1.10286	101	0.75	0	5.78016	6.39101	6.12397	5.58024	6.49136	6.39623	6.44561	5.54208	4.80465
275	2	18.0967	0.104459	1.10885	101	0.75	0	5.46744	6.73498	5.42608	6.50499	5.85632	5.18485	5.38183	5.29636	5.6496
275	3	17.7383	0.0968464	1.11562	101	0.75	0	4.82762	5.31826	5.35595	4.93734	4.29391	4.58072	4.46923	4.58065	4.3597
275	4	17.4142	0.0858568	1.12224	101	0.75	0	4.7397	5.44774	5.08911	6.09953	4.24818	5.02439	5.37336	4.99972	4.38977
275	5	17.6	0.0986999	1.14867	101	0.75	0	5.49072	5.3994	5.85884	6.42109	6.87704	5.60804	5.72292	6.19806	4.9959
275	6	18.1317	0.128807	37.6078	101	0.75	0	4.66709	5.22155	5.2328	4.64734	4.36521	4.73642	5.54526	4.08438	3.82381
275	7	23.7442	0.761083	329.373	101	0.75	0	11.9745	12.4298	11.3307	9.26181	9.56846	14.3868	9.78291	12.7062	10.6999
275	8	27.9117	1.58785	752.267	101	0.75	0	21.8817	32.5144	43.4984	20.2852	28.2937	64.9928	37.8111	84.1378	99.3706
275	9	29.7383	1.95347	1572.75	101	0.75	0	23.8152	35.8122	50.2463	22.2063	29.0099	65.1285	39.5315	84.4509	100.541
275	10	30.0083	2.02824	1077.31	101	0.75	0	23.8169	36.2418	51.1888	21.391	30.1895	67.5425	42.3391	87.9862	104.395
275	11	31.1733	2.23108	1476.68	101	0.75	0	23.2794	36.7462	52.5173	21.8833	29.9028	68.0269	43.4597	89.3397	105.517
275	12	31.6733	2.39987	1843.91	101	0.75	0	22.0196	35.7277	51.4782	21.4883	29.6939	66.8918	43.0865	87.1204	99.3102
275	13	32.39	2.58507	2069.7	101	0.75	0	22.2874	35.9324	53.3768	21.2541	29.3801	63.8509	43.1616	89.7148	99.8594
275	14	33.0508	2.66474	2027.06	101	0.75	0	22.1675	34.0695	50.8752	21.0342	28.759	64.9863	42.7823	85.7343	99.6433
275	15	30.5592	2.11144	851.593	101	0.75	0	21.0577	34.5055	50.7156	19.9263	28.6426	64.4598	41.4853	88.3381	101.382
275	16	27.185	1.42335	176.759	101	0.75	0	20.2268	26.2386	35.3211	19.3951	24.1061	46.3867	34.569	67.5826	66.7931
275	17	25.8533	1.19984	26.6239	101	0.75	0	18.8931	18.3646	19.9593	17.2635	18.1755	18.9666	21.3598	17.7966	17.6485
275	18	24.3775	0.948299	1.77244	101	0.75	0	16.8338	15.632	16.4272	14.3248	15.8458	15.3408	17.3075	14.3438	14.7026
275	19	23.025	0.704847	1.03352	101	0.75	0	15.0565	14.6274	14.6511	13.8549	14.277	14.3159	15.1918	12.8396	12.8448
275	20	22.9967	0.692268	1.03667	101	0.75	0	13.0479	12.7631	14.8207	12.9623	13.7454	13.1996	13.0008	12.5237	12.2512
275	21	21.7775	0.460695	1.05044	101	0.75	0	11.3692	11.3521	12.6897	11.666	12.3739	9.85585	10.6391	9.72433	9.07722
275	22	20.5408	0.284842	1.06945	101	0.75	0	7.55554	7.38084	9.31433	7.51468	7.69451	6.5591	6.83138	7.13431	6.8998
275	23	20.7917	0.302131	1.07198	101	0.75	0	9.69608	9.1022	11.0092	10.3582	9.40784	11.8797	9.50809	11.2515	8.20291
276	0	20.6808	0.304014	1.07306	101	0.75	0	9.00789	8.80144	10.3862	9.54333	10.3692	12.3655	10.277	8.37026	6.68971
276	1	19.915	0.212875	1.08199	101	0.75	0	9.55068	8.65398	10.0498	8.20075	9.70671	8.15664	6.6776	6.55375	6.32013
276	2	21.0908	0.3999	1.07124	101	0.75	0	15.7954	15.5483	15.7187	11.6797	12.7248	14.3757	13.7439	14.1523	13.8811
276	3	21.7567	0.53399	1.0624	101	0.75	0	17.5279	17.4604	17.9267	17.2666	16.4267	17.241	17.1668	16.475	15.7602
276	4	20.8783	0.392578	1.06854	101	0.75	0	11.5651	10.9892	12.4745	10.8702	11.106	10.0841	11.6207	11.0795	9.80376
276	5	19.3492	0.175366	1.10715	101	0.75	0	7.2914	7.74833	7.85613	6.79093	7.10545	5.80071	6.22687	5.58244	5.13254
276	6	20.6467	0.307925	36.0997	101	0.75	0	12.1248	11.2321	12.1324	10.6366	9.5787	10.5432	9.23495	8.18604	10.0557
276	7	25.1383	0.918342	256.56	101	0.75	0	17.1369	16.3999	17.911	16.1565	16.992	20.514	17.1225	18.4002	17.2237
276	8	27.6258	1.38186	809.904	101	0.75	0	18.8039	28.9387	40.7904	17.7354	26.4011	60.8349	34.5681	81.3089	93.5991
276	9	30.6083	2.16911	1523.13	101	0.75	0	21.0816	32.4312	49.2089	19.3806	27.6249	62.8036	37.6684	78.3855	98.5403
276	10	31.2167	2.30817	1347.17	101	0.75	0	20.6598	32.5286	46.6175	19.8267	28.0562	60.1255	37.9412	87.3237	98.1165
276	11	31.6392	2.42631	1522.63	101	0.75	0	21.2851	32.8175	46.1001	20.0054	27.9249	58.3738	38.5784	81.0809	98.4079
276	12	31.1608	2.23692	1392.61	101	0.75	0	21.3668	32.9599	46.656	20.0867	27.2319	59.9861	40.6541	85.7884	101.459
276	13	31.8992	2.41186	1865.48	101	0.75	0	21.907	32.4447	48.4477	20.4764	27.7989	57.2431	38.9726	75.3853	93.3176
276	14	32.3533	2.67919	2002.74	101	0.75	0	23.433	33.4327	46.9354	21.6741	28.5183	57.5941	40.1536	78.1334	93.1042
276	15	32.5592	2.80891	1765.45	101	0.75	0	24.1132	34.6186	49.3443	22.3095	28.9	60.8089	40.9024	77.3396	94.7653
276	16	30.375	2.28937	727.828	101	0.75	0	23.2725	27.6618	36.1578	21.6366	25.9669	46.8971	35.522	60.3944	62.424
276	17	26.98	1.4823	49.868	101	0.75	0	22.8385	21.6366	22.8102	20.5106	21.9942	22.1952	23.3793	20.6754	19.8776
276	18	25.2925	1.13301	2.10243	101	0.75	0	21.7003	21.254	22.6192	20.3005	20.4266	21.5727	23.3889	21.2065	20.3829
276	19	24.7392	1.03619	1.01155	101	0.75	0	22.3321	21.6674	22.7175	20.3382	20.1652	21.284	21.9932	20.1237	19.416
276	20	24.4875	0.945403	1.01515	101	0.75	0	20.0813	19.6773	22.4011	19.5517	19.2616	20.6256	20.6359	19.3705	18.5506
276	21	24.495	0.967926	1.01498	101	0.75	0	22.5479	21.7066	23.2293	21.3086	21.1984	22.4715	22.1073	21.4072	20.5366
276	22	24.54	1.10354	1.01395	101	0.75	0	25.0432	24.5458	25.1008	22.4207	23.6918	24.343	23.7695	22.6976	22.528
276	23	24.4	1.11515	1.01601	101	0.75	0	26.015	24.8435	26.3381	23.3133	24.5312	25.0952	24.5451	24.0448	23.8785
277	0	23.95	1.02177	1.02343	101	0.75	0	24.9306	24.4871	25.6781	22.5842	23.0787	24.1921	23.3666	23.1639	22.2996
277	1	23.775	1.01583	1.02741	101	0.75	0	25.3193	24.127	26.4051	23.396	23.9563	25.3524	24.27	24.0296	23.3829
277	2	23.8283	1.01189	1.02498	101	0.75	0	26.0835	25.8347	26.78	23.7496	24.7039	25.2737	25.4555	24.7462	24.1751
277	3	23.7542	1.02635	1.02429	101	0.75	0	26.0196	26.2964	28.204	24.9434	25.0631	26.4807	25.0698	24.1403	24.6885
277	4	23.5708	0.917018	1.03144	101	0.75	0	26.7014	25.4545	27.1121	24.0937	24.663	25.5322	24.7133	24.4729	24.8114
277	5	23.1517	0.965897	1.0659	101	0.75	0	26.3759	25.5779	27.2689	24.5993	24.4044	25.333	25.2748	24.1207	24.4151
277	6	23.9308	1.02953	37.626	101	0.75	0	26.1953	24.8363	27.038	23.6755	23.6828	25.1528	25.1722	24.3905	23.581
277	7	26.2892	1.35347	301.749	101	0.75	0	26.9113	25.2937	27.6181	24.66	25.9692	30.271	26.9263	28.4566	27.5709
277	8	28.5158	1.81307	854.719	101	0.75	0	27.9811	37.5252	49.2502	26.2848	34.3018	68.3338	43.2357	91.5142	103.143
277	9	29.9725	2.23759	1428.91	101	0.75	0	29.682	39.8822	54.2406	27.2141	33.9974	63.2054	44.4045	87.6847	105.188
277	10	31.2242	2.56715	1654.25	101	0.75	0	28.3861	38.5385	53.9199	26.8012	33.3593	65.2135	45.235	89.6881	97.5729
277	11	30.5975	2.32941	1313.75	101	0.75	0	27.134	37.8768	51.4268	24.8231	32.2794	63.9051	44.6134	82.3564	101.002
277	12	31.3492	2.51486	1521.77	101	0.75	0	27.7246	37.6244	51.3898	25.369	32.3947	62.8386	44.3752	84.6722	97.1531
277	13	30.5067	2.23931	1171.57	101	0.75	0	26.2066	36.3139	50.6172	23.9112	31.1043	63.1263	43.1267	82.2466	96.8869
277	14	30.1583	2.1677	1089.37	101	0.75	0	25.7954	36.1248	49.9786	24.2803	31.3448	62.1199	42.4572	79.7992	95.1158
277	15	30.95	2.42573	1299.45	101	0.75	0	25.3726	36.0008	49.5396	23.4126	30.7364	61.4972	43.3334	80.432	97.0018
277	16	28.4692	1.79185	390.453	101	0.75	0	23.5822	28.8585	36.7579	23.5505	27.8057	49.0786	37.7967	61.5158	65.2148
277	17	26.6008	1.41943	74.0292	101	0.75	0	23.8028	23.2248	23.6341	21.8587	22.1495	22.8264	25.0703	21.945	21.4643
277	18	24.5692	1.0151	1.47532	101	0.75	0	23.8119	22.379	23.8308	21.7538	21.8757	22.9811	24.3077	21.5659	22.1117
277	19	24.1217	1.04687	1.02516	101	0.75	0	23.8757	22.7806	23.7592	20.9572	21.4341	23.1312	23.6526	22.1673	21.3218
277	20	23.9533	1.04049	1.0295	101	0.75	0	24.1593	22.1416	23.7934	21.688	22.5117	22.7057	23.1595	21.7778	21.3631
277	21	23.545	0.879355	1.03737	101	0.75	0	22.4715	22.6844	22.9912	21.7289	21.8809	22.2701	22.9519	20.8511	20.8869
277	22	23.49	0.920861	1.03736	101	0.75	0	23.3885	22.6131	23.3573	21.4787	22.0467	22.9857	21.8803	21.3775	21.3486
277	23	23.5475	0.905721	1.03351	101	0.75	0	21.58	22.3198	24.7393	21.4969	21.5518	22.8603	22.4331	20.5731	21.7663
278	0	23.355	0.915918	1.03509	101	0.75	0	23.6773	23.7636	24.9788	21.9118	22.4482	23.1824	22.8025	21.811	22.5197
278	1	22.9158	0.88247	1.04282	101	0.75	0	21.7653	21.2764	23.8037	20.9312	21.4885	23.1431	22.0722	20.9075	21.0067
278	2	23.4358	0.851394	1.03317	101	0.75	0	24.1858	23.3388	24.7582	22.5605	22.561	22.9996	22.1844	22.7551	22.0373
278	3	23.4458	0.935244	1.03316	101	0.75	0	24.501	22.9455	24.842	22.1794	22.9245	23.4458	22.4308	22.5827	22.1287
278	4	23.4367	0.961757	1.03614	101	0.75	0	24.5716	23.7789	25.4099	21.4081	22.8098	23.3917	22.2265	21.6071	21.8621
278	5	23.3	0.880869	1.07971	101	0.75	0	23.6688	23.285	25.3124	21.7873	21.4598	23.7711	22.1132	21.9232	21.0145
278	6	23.2767	0.819733	35.3073	101	0.75	0	21.766	21.1682	22.9707	20.3058	20.2227	22.0701	20.0145	20.6702	19.9545
278	7	26.8975	1.48833	331.689	101	0.75	0	22.9694	22.7202	24.6589	21.8343	22.6841	27.932	23.2892	24.3964	23.3577
278	8	28.0033	1.65481	637.611	101	0.75	0	25.5888	35.2359	46.5841	24.0163	32.1792	67.3664	40.7977	84.6668	101.69
278	9	29.5792	2.06851	1247.78	101	0.75	0	26.8652	37.6	52.8754	24.7148	32.1391	69.9817	42.2659	85.2748	105.553
278	10	30.9775	2.36771	1446.78	101	0.75	0	26.8351	38.3583	53.3084	25.0001	32.7012	67.6691	44.0043	87.8239	105.323
278	11	31.2067	2.31717	1329.63	101	0.75	0	26.5081	38.9069	54.6554	25.2935	33.2624	65.3592	45.6289	88.6959	103.279
278	12	30.4467	2.10449	1352.92	101	0.75	0	26.9884	38.1063	53.9755	25.6095	32.4169	68.0394	46.6085	91.2807	102.763
278	13	31.7683	2.48947	1715.11	101	0.75	0	26.9123	38.1849	53.7374	26.0171	32.8928	65.0747	47.2847	89.5297	106.077
278	14	30.3825	2.26203	975.32	101	0.75	0	27.3492	38.3381	55.2042	25.9338	33.0692	66.8231	46.8103	89.3043	103.603
278	15	28.8925	1.90586	628.654	101	0.75	0	26.6764	38.0926	54.1722	25.7283	32.7417	66.1844	46.2434	92.3359	107.426
278	16	27.1875	1.5247	239.908	101	0.75	0	25.4339	30.7703	40.521	24.4037	28.0769	49.9346	39.0351	65.9553	70.0442
278	17	25.6308	1.22974	33.9079	101	0.75	0	25.5563	24.2493	25.1236	22.9455	23.3874	25.0651	27.7429	24.0366	22.7679
278	18	24.6292	1.03817	1.96513	101	0.75	0	23.7407	22.3582	24.1814	21.0453	21.9523	23.2939	25.1379	22.1006	21.6562
[truncated: 281 more rows]
