# Supplementary material for: Examining ozone effects on the tropical C4 crop Sorghum bicolor
Source: PeerJ journal article supplement (doi:10.7717/peerj.18844), 2025-01-20
Supplement: Data_set_S2.zip [file Data_set_S2.zip]

## Sheet: Metadata
Chlorophyll content index (CCI) measurements by a portable chlorophyll meter (MC-100)
	Parameter	Description
	Exp_ID	Experiment ID
	Plant_ID	unique plant ID
	CCI	chlorophyll content index (CCI)
	Tracking	Leaf tracking
	Datetime	local time

## Sheet: SB1_Data
Exp_ID	Plant_ID	CCI	Tracking	Datetime
SB1	2	26.2	T	2020-08-11 10:41:11
SB1	2	30.6	T	2020-08-11 10:41:11
SB1	2	35.6	T	2020-08-11 10:41:11
SB1	2	33.4	T	2020-08-11 10:41:11
SB1	2	35.7	T	2020-08-11 10:41:11
SB1	2	44.6	T	2020-08-11 10:41:11
SB1	1	31.7	T	2020-08-11 10:42:26
SB1	1	36.8	T	2020-08-11 10:42:26
SB1	1	25.5	T	2020-08-11 10:42:26
SB1	1	32.8	T	2020-08-11 10:42:26
SB1	1	36.4	T	2020-08-11 10:42:26
SB1	1	28.4	T	2020-08-11 10:42:26
SB1	3	28	T	2020-08-11 10:43:31
SB1	3	30.1	T	2020-08-11 10:43:31
SB1	3	38.1	T	2020-08-11 10:43:31
SB1	3	36.1	T	2020-08-11 10:43:31
SB1	3	32.1	T	2020-08-11 10:43:31
SB1	3	28	T	2020-08-11 10:43:31
SB1	5	25.3	T	2020-08-11 10:44:39
SB1	5	27.3	T	2020-08-11 10:44:39
SB1	5	31.4	T	2020-08-11 10:44:39
SB1	5	21.3	T	2020-08-11 10:44:39
SB1	5	26	T	2020-08-11 10:44:39
SB1	5	27.5	T	2020-08-11 10:44:39
SB1	4	18.5	T	2020-08-11 10:45:47
SB1	4	21.8	T	2020-08-11 10:45:47
SB1	4	26.9	T	2020-08-11 10:45:47
SB1	4	23.8	T	2020-08-11 10:45:47
SB1	4	37	T	2020-08-11 10:45:47
SB1	4	30.2	T	2020-08-11 10:45:47
SB1	6	25.8	T	2020-08-11 10:47:00
SB1	6	33.6	T	2020-08-11 10:47:00
SB1	6	35.3	T	2020-08-11 10:47:00
SB1	6	36.8	T	2020-08-11 10:47:00
SB1	6	33.2	T	2020-08-11 10:47:00
SB1	6	29.3	T	2020-08-11 10:47:00
SB1	8	37.9	T	2020-08-11 10:47:47
SB1	8	41.2	T	2020-08-11 10:47:47
SB1	8	31.9	T	2020-08-11 10:47:47
SB1	8	19	T	2020-08-11 10:47:47
SB1	8	25.9	T	2020-08-11 10:47:47
SB1	8	30.4	T	2020-08-11 10:47:47
SB1	7	41.4	T	2020-08-11 10:48:38
SB1	7	34	T	2020-08-11 10:48:38
SB1	7	44.6	T	2020-08-11 10:48:38
SB1	7	20.9	T	2020-08-11 10:48:38
SB1	7	34	T	2020-08-11 10:48:38
SB1	7	40.6	T	2020-08-11 10:48:38
SB1	9	24.6	T	2020-08-11 10:49:48
SB1	9	31.5	T	2020-08-11 10:49:48
SB1	9	41.9	T	2020-08-11 10:49:48
SB1	9	40.8	T	2020-08-11 10:49:48
SB1	9	30.9	T	2020-08-11 10:49:48
SB1	9	25	T	2020-08-11 10:49:48
SB1	10	36.3	T	2020-08-11 10:50:51
SB1	10	46.3	T	2020-08-11 10:50:51
SB1	10	42.7	T	2020-08-11 10:50:51
SB1	10	36.7	T	2020-08-11 10:50:51
SB1	10	34.3	T	2020-08-11 10:50:51
SB1	10	37.4	T	2020-08-11 10:50:51
SB1	11	34.1	T	2020-08-11 10:51:37
SB1	11	39.2	T	2020-08-11 10:51:37
SB1	11	42.1	T	2020-08-11 10:51:37
SB1	11	42.7	T	2020-08-11 10:51:37
SB1	11	34.4	T	2020-08-11 10:51:37
SB1	11	29.7	T	2020-08-11 10:51:37
SB1	12	22.7	T	2020-08-11 10:53:54
SB1	12	33.6	T	2020-08-11 10:53:54
SB1	12	40.1	T	2020-08-11 10:53:54
SB1	12	26.9	T	2020-08-11 10:53:54
SB1	12	26	T	2020-08-11 10:53:54
SB1	12	24.7	T	2020-08-11 10:53:54
SB1	14	29.5	T	2020-08-11 10:54:56
SB1	14	31.6	T	2020-08-11 10:54:56
SB1	14	30.3	T	2020-08-11 10:54:56
SB1	14	18	T	2020-08-11 10:54:56
SB1	14	20.2	T	2020-08-11 10:54:56
SB1	14	29.5	T	2020-08-11 10:54:56
SB1	13	29.2	T	2020-08-11 10:55:49
SB1	13	37	T	2020-08-11 10:55:49
SB1	13	49.4	T	2020-08-11 10:55:49
SB1	13	41	T	2020-08-11 10:55:49
SB1	13	33.6	T	2020-08-11 10:55:49
SB1	13	36.4	T	2020-08-11 10:55:49
SB	15	36	T	2020-08-11 10:56:51
SB	15	35.4	T	2020-08-11 10:56:51
SB	15	35	T	2020-08-11 10:56:51
SB	15	39.6	T	2020-08-11 10:56:51
SB	15	34.6	T	2020-08-11 10:56:51
SB	15	38.6	T	2020-08-11 10:56:51
SB1	16	35.5	T	2020-08-11 10:57:26
SB1	16	33.6	T	2020-08-11 10:57:26
SB1	16	35.7	T	2020-08-11 10:57:26
SB1	16	30.5	T	2020-08-11 10:57:26
SB1	16	32	T	2020-08-11 10:57:26
SB1	16	32.6	T	2020-08-11 10:57:26
SB1	17	40.6	T	2020-08-11 10:58:12
SB1	17	44	T	2020-08-11 10:58:12
SB1	17	53.5	T	2020-08-11 10:58:12
SB1	17	28.9	T	2020-08-11 10:58:12
SB1	17	39.7	T	2020-08-11 10:58:12
SB1	17	51.1	T	2020-08-11 10:58:12
SB1	18	31.5	T	2020-08-11 10:59:21
SB1	18	35.8	T	2020-08-11 10:59:21
SB1	18	37.3	T	2020-08-11 10:59:21
SB1	18	41.7	T	2020-08-11 10:59:21
SB1	18	44.2	T	2020-08-11 10:59:21
SB1	18	34	T	2020-08-11 10:59:21
SB1	20	35.5	T	2020-08-11 11:00:06
SB1	20	40.8	T	2020-08-11 11:00:06
SB1	20	43.9	T	2020-08-11 11:00:06
SB1	20	42.1	T	2020-08-11 11:00:06
SB1	20	34.6	T	2020-08-11 11:00:06
SB1	20	39.3	T	2020-08-11 11:00:06
SB1	19	27	T	2020-08-11 11:00:48
SB1	19	33.6	T	2020-08-11 11:00:48
SB1	19	43.4	T	2020-08-11 11:00:48
SB1	19	41.3	T	2020-08-11 11:00:48
SB1	19	35	T	2020-08-11 11:00:48
SB1	19	26.9	T	2020-08-11 11:00:48
SB1	21	19	T	2020-08-11 11:01:38
SB1	21	29.4	T	2020-08-11 11:01:38
SB1	21	35.6	T	2020-08-11 11:01:38
SB1	21	38	T	2020-08-11 11:01:38
SB1	21	35.5	T	2020-08-11 11:01:38
SB1	21	31.3	T	2020-08-11 11:01:38
SB1	22	19.4	T	2020-08-11 11:02:24
SB1	22	28.6	T	2020-08-11 11:02:24
SB1	22	34.4	T	2020-08-11 11:02:24
SB1	22	42.5	T	2020-08-11 11:02:24
SB1	22	30.7	T	2020-08-11 11:02:24
SB1	22	21.6	T	2020-08-11 11:02:24
SB1	23	37.9	T	2020-08-11 11:02:57
SB1	23	41.2	T	2020-08-11 11:02:57
SB1	23	39.9	T	2020-08-11 11:02:57
SB1	23	34	T	2020-08-11 11:02:57
SB1	23	42.2	T	2020-08-11 11:02:57
SB1	23	44.3	T	2020-08-11 11:02:57
SB1	24	25.7	T	2020-08-11 11:03:45
SB1	24	37.5	T	2020-08-11 11:03:45
SB1	24	41.6	T	2020-08-11 11:03:45
SB1	24	38.2	T	2020-08-11 11:03:45
SB1	24	28.5	T	2020-08-11 11:03:45
SB1	24	19.9	T	2020-08-11 11:03:45
SB1	25	46.3	T	2020-08-11 11:04:19
SB1	25	45.5	T	2020-08-11 11:04:19
SB1	25	48.7	T	2020-08-11 11:04:19
SB1	25	42.7	T	2020-08-11 11:04:19
SB1	25	36.9	T	2020-08-11 11:04:19
SB1	25	31.8	T	2020-08-11 11:04:19
SB1	26	17.9	T	2020-08-11 11:04:47
SB1	26	24.6	T	2020-08-11 11:04:47
SB1	26	34.2	T	2020-08-11 11:04:47
SB1	26	22.9	T	2020-08-11 11:04:47
SB1	26	18.8	T	2020-08-11 11:04:47
SB1	26	19.5	T	2020-08-11 11:04:47
SB1	27	29.3	T	2020-08-11 11:05:11
SB1	27	38.6	T	2020-08-11 11:05:11
SB1	27	40.2	T	2020-08-11 11:05:11
SB1	27	39.9	T	2020-08-11 11:05:11
SB1	27	40.1	T	2020-08-11 11:05:11
SB1	27	30.4	T	2020-08-11 11:05:11
